# Supplementary material for: Benzyladenine Effects On Polyamine Contents And Proteomic Profiles During In Vitro Shoot Development And On Ex Vitro Rooting In Dalbergia Nigra (Vell.) Allemão Ex Benth. (Fabaceae)
Source: Research Square preprint supplement (doi:10.21203/rs.3.rs-1419531/v1), 2022-03-16
Supplement: Supplementary file 1 [file 8cbbaa1be58c81972799ad90.xlsx]

## Sheet: All identified proteins
Table S1 Complete list of all identified proteins in 45-day-old shoots of Dalbergia nigra obtained from apical and cotyledonary nodal segments used as explants and the benziladenine (BA) concentrations, comparing the effect of BA concentration in the same tipe of explant (BA2.5_Apical/BA0_Apical and BA2.5_Cotyledonary/BA0_Cotyledonary comparisons), and the effect of explant (Apical and Cotyledona…
Accession	reported peptides	max score	Description	Description Blast2Go	Biological Process	Normalized Total Ion Count (Tic)												Average				T-Test				Log2 Fold Change				Differential accumulation
						BA0_Apical_1	BA0_Apical_2	BA0_Apical_3	BA2.5_Apical_1	BA2.5_Apical_2	BA2.5_Apical_3	BA0_Cotyledonary_1	BA0_Cotyledonaryr_2	BA0_Cotyledonary_3	BA2.5_Cotyledonary_1	BA2.5_Cotyledonary_2	BA2.5_Cotyledonary_3	BA0_Apical	BA2.5_Apical	BA0_Cotyledonary	BA2.5_Cotyledonary	BA2.5_Apical/BA0_Apical	BA2.5_Cotyledonary/BA0_Cotyledonary	BA2.5_Cotyledonary/BA2.5_Apical	BA0_Cotyledonary/BA0_Apical	BA2.5_Apical/BA0_Apical	BA2.5_Cotyledonary/BA0_Cotyledonary	BA2.5_Cotyledonary/BA2.5_Apical	BA0_Cotyledonary/BA0_Apical	BA2.5_Apical/BA0_Apical	BA2.5_Cotyledonary/BA0_Cotyledonary	BA2.5_Cotyledonary/BA2.5_Apical	BA0_Cotyledonary/BA0_Apical
A0A445BSX1	5	23596.6	Uncharacterized protein	photosystem II 32 kDa protein	P:generation of precursor metabolites and energy; P:photosynthesis;	9332.51	9649.97	12150.4	44889.7	50139.2	35598.1	30612.1	51086.8	44966.7	69980.5	70975.8	68206	10377.6	43542.4	42221.9	69720.8	0.00158056	0.0108882	0.0037689	0.00655021	2.06894	0.723598	0.679169	2.02451	UP	UP	UP	UP
A0A444YLN0	11	2384.3	AAA domain-containing protein	26S proteasome regulatory subunit 7	P:nucleobase-containing compound metabolic process; P:catabolic process; P:biosynthetic process; P:cellular component organization; P:protein metabolic process;	19125.3	18640	23001	61771.4	58237.2	72673.9	21326.9	19613.8	20605.3	135289	121835	91929.9	20255.4	64227.5	20515.3	116351	0.000646042	0.00171348	0.0182646	0.867952	1.66488	2.50371	0.857223	0.018393	UP	UP	UP	UNCHANGED
A0A444Y820	3	6271.15	Histone H2A	histone H2A	P:cellular component organization;	57569.4	114506	126988	257778	184359	224133	49789.2	128543	219947	363968	340372	350089	99687.8	222090	132760	351476	0.0152863	0.0116363	0.00438612	0.570664	1.15565	1.40461	0.662284	0.413328	UP	UP	UP	UNCHANGED
A0A445DYS8	3	715.581	Usp domain-containing protein	universal stress protein PHOS32		23738	23994.9	15068.9	38567.8	31286.9	33410.7	25737.4	31655.5	29373.5	51830.5	62038.6	57614.5	20933.9	34421.8	28922.2	57161.2	0.0208092	0.00117527	0.00342151	0.0786885	0.71748	0.982861	0.731713	0.466332	UP	UP	UP	UNCHANGED
A0A444YGB9	4	2793.51	Uncharacterized protein	pre-mRNA-splicing factor ATP-dependent RNA helicase DEAH7-like	P:response to stress; P:catabolic process; P:cellular process; P:response to chemical	25925.3	37408.7	29170.5	57899.7	44935.7	69202.7	18255	27563.7	35016	143560	147388	125629	30834.8	57346	26944.9	138859	0.0273002	0.000173036	0.00109837	0.54778	0.895132	2.36554	1.27585	-0.194549	UP	UP	UP	UNCHANGED
A0A444Y7Y0	22	12228.3	Elongation factor 1-alpha	elongation factor 1-alpha		28527.6	43192.6	54416.4	447045	428696	430503	49588	69992.2	69272.6	466750	393491	420059	42045.5	435415	62950.9	426767	2.03389e-06	8.45554e-05	0.716655	0.105838	3.37237	2.76115	-0.028942	0.582276	UP	UP	UNCHANGED	UNCHANGED
A0A444Y3F0	7	6505.69	Uncharacterized protein	glyceraldehyde-3-phosphate dehydrogenase B, chloroplastic	P:carbohydrate metabolic process; P:cellular process; P:response to chemical	3392.51	3899.87	3455.49	8717.31	7909.03	7613.37	4152.03	3873.42	5016.24	7336.47	6043.82	7613.94	3582.62	8079.9	4347.23	6998.08	0.000253417	0.0111149	0.138408	0.114025	1.17332	0.686862	-0.207379	0.27908	UP	UP	UNCHANGED	UNCHANGED
A0A444YKD2	7	6148.01	Aldo_ket_red domain-containing protein	probable aldo-keto reductase 1	P:metabolic process	23454.1	46480.7	21847.3	124565	118124	142084	37399.4	36898	22720.6	123821	132845	86987.9	30594	128258	32339.3	114551	0.000800395	0.00517585	0.433201	0.860251	2.06772	1.82463	-0.16305	0.0800397	UP	UP	UNCHANGED	UNCHANGED
A0A445A0E8	7	8434.98	Uncharacterized protein	glyceraldehyde-3-phosphate dehydrogenase B, chloroplastic	P:carbohydrate metabolic process;	50786.5	46303.3	48534.6	81592.1	94066.3	79433.9	36943.3	37876.7	36838	80124.1	80453	65827.3	48541.5	85030.8	37219.3	75468.1	0.00153275	0.00137899	0.223049	0.00106153	0.808767	1.01982	-0.172117	-0.383167	UP	UP	UNCHANGED	UNCHANGED
A0A445A3Z4	28	22356.7	Uncharacterized protein	dolichol kinase EVAN isoform X1	P:lipid metabolic process; P:biosynthetic process;	13995.7	15693.8	12139.3	33560.2	29481.8	38863	14967.1	27466.5	28881.4	42011.4	50982.6	57218.5	13942.9	33968.3	23771.7	50070.9	0.00231661	0.0135879	0.0359653	0.0962942	1.28466	1.07473	0.559781	0.769708	UP	UP	UNCHANGED	UNCHANGED
A0A445A5D9	3	2909.22	Aldedh domain-containing protein	aldehyde dehydrogenase family 2 member C4	P:metabolic process	9780.37	11139.5	10614.8	23856.7	24962.9	32269.2	12399.4	10621.7	13997.9	30577.7	23383.1	30336.3	10511.5	27029.6	12339.6	28099	0.00346319	0.00349564	0.777617	0.157349	1.36257	1.18722	0.0559811	0.231328	UP	UP	UNCHANGED	UNCHANGED
A0A445DLN8	16	8534.86	FMN hydroxy acid dehydrogenase domain-containing protein	peroxisomal (S)-2-hydroxy-acid oxidase	P:metabolic process; P:cellular process;	111711	60833.9	46861.2	468037	319491	493533	109878	130356	185471	350588	399707	214557	73135.4	427020	141902	321617	0.00358938	0.0397351	0.24559	0.083397	2.54566	1.18045	-0.40896	0.956248	UP	UP	UNCHANGED	UNCHANGED
A0A445C479	7	537.088	Uncharacterized protein	protein argonaute 4		60191.7	82335	68596.8	115016	115595	133592	44018.1	69053.6	68352.6	102733	111238	109099	70374.5	121401	60474.7	107690	0.00454417	0.00540356	0.106761	0.397488	0.786652	0.832479	-0.172893	-0.21872	UP	UP	UNCHANGED	UNCHANGED
A0A445BGF3	21	26125.2	Pyruvate kinase	pyruvate kinase 1, cytosolic	P:carbohydrate metabolic process; P:generation of precursor metabolites and energy; P:nucleobase-containing compound metabolic process; P:catabolic process;	81473.6	106468	78456.7	149231	144781	171758	79004.7	65291.2	84400.2	194071	195319	206139	88799.6	155257	76232	198510	0.00549573	5.81464e-05	0.00925411	0.299138	0.80603	1.38074	0.354556	-0.220156	UP	UP	UNCHANGED	UNCHANGED
A0A445A993	2	861.435	Uncharacterized protein	calreticulin-3	P:response to stress; P:signal transduction; P:response to chemical;	1830.58	9003.94	5435.1	20124.1	23765.1	17254.3	2184.47	7728.63	12772.9	25241	22241.5	37169.5	5423.21	20381.2	7562.01	28217.3	0.00591298	0.0197292	0.187365	0.593535	1.91002	1.89974	0.469344	0.479623	UP	UP	UNCHANGED	UNCHANGED
A0A444ZKM6	9	4555.5	Peroxidase	cationic peroxidase 1-like	P:response to stress; P:catabolic process; P:cellular process; P:response to chemical;	13597.8	13256.9	11335.4	30324.3	30052	22132.5	16384	11724.1	6949.72	22173.6	22808	23387.3	12730	27502.9	11685.9	22789.6	0.00600779	0.0155572	0.156879	0.729345	1.11135	0.963604	-0.271208	-0.123462	UP	UP	UNCHANGED	UNCHANGED
A0A444Y8T2	11	1640.39	Lipoxygenase	seed linoleate 9S-lipoxygenase-2	P:lipid metabolic process; P:biosynthetic process; P:cellular process;	35086	34748.1	43095.8	114067	123766	80976	36275.5	60504.4	61795.1	111877	109481	104815	37643.3	106270	52858.3	108724	0.00658653	0.00284057	0.860691	0.156559	1.49727	1.04047	0.0329406	0.489737	UP	UP	UNCHANGED	UNCHANGED
A0A445DE06	2	5357.99	RRM domain-containing protein	glycine-rich RNA-binding protein GRP1A		5032.62	10521.5	11491.5	20239.8	20039.2	18519.6	6686.88	6419.33	5704.26	11757.2	15767.6	15915.6	9015.22	19599.5	6270.16	14480.1	0.00707358	0.00414885	0.0250973	0.248116	1.12038	1.2075	-0.436746	-0.52386	UP	UP	UNCHANGED	UNCHANGED
A0A444ZU45	4	547.236	Tr-type G domain-containing protein	eukaryotic peptide chain release factor GTP-binding subunit ERF3A isoform X1	P:cellular component organization;	8251.97	26853.3	33126.2	54009.2	59474.8	59849.9	10415.2	20920.9	35027	62593.7	57628.4	58231.6	22743.8	57778	22121	59484.5	0.0104353	0.00689331	0.524669	0.954798	1.34504	1.4271	0.0419951	-0.0400568	UP	UP	UNCHANGED	UNCHANGED
A0A444Z3W1	12	17984.7	AAA domain-containing protein	Cell division control protein 48 homolog D	P:transport; P:response to stress; P:cell cycle; P:catabolic process; P:pollination; P:cellular component organization; P:cell growth; P:protein metabolic process; P:cell differentiation; P:response to chemical; P:anatomical structure development;	80898.2	104430	42279.2	177608	188430	147540	81487.7	75241.5	75046.7	166681	162116	163238	75869.2	171193	77258.6	164011	0.0120551	4.2625e-06	0.590912	0.942936	1.17404	1.08603	-0.0618266	0.0261823	UP	UP	UNCHANGED	UNCHANGED
A0A444WNT6	7	3311.94	Aldo_ket_red domain-containing protein	probable aldo-keto reductase 2	P:metabolic process	46286.5	48671.7	47792.1	67010.6	93468.4	91862.4	51273.3	39818.7	31985.5	68431.4	68157.7	81534	47583.5	84113.8	41025.8	72707.7	0.0131429	0.0113079	0.302015	0.309863	0.821882	0.825576	-0.210234	-0.213927	UP	UP	UNCHANGED	UNCHANGED
A0A445EGE3	7	5235.34	40S ribosomal protein SA	40S ribosomal protein SA isoform X1	P:translation; P:cellular component organization;	108431	207937	164270	274955	283122	302220	113662	101409	150965	201040	211567	227019	160213	286766	122012	213209	0.0133553	0.00547086	0.00264822	0.304038	0.839883	0.80524	-0.427607	-0.392964	UP	UP	UNCHANGED	UNCHANGED
A0A445DTN4	23	14508.4	Tubulin beta chain	tubulin beta-1 chain	P:cell cycle; P:cellular component organization;	75162	80551	91384	138416	133987	108255	63720.6	78911	104589	157768	143956	179086	82365.7	126886	82406.8	160270	0.0134499	0.00771794	0.074023	0.997599	0.623418	0.959668	0.33697	0.00072018	UP	UP	UNCHANGED	UNCHANGED
A0A445BBS5	15	6529.21	Uncharacterized protein	pyruvate decarboxylase 1		39306	76078.4	74879.1	223811	167738	303706	11516	48638.5	42648.4	349708	400411	301734	63421.2	231752	34267.6	350618	0.015094	0.000501913	0.0710034	0.155231	1.86954	3.35498	0.597319	-0.888118	UP	UP	UNCHANGED	UNCHANGED
A0A445EVE4	4	1417.96	TPT domain-containing protein	glucose-6-phosphate/phosphate translocator 1, chloroplastic	P:transport;	63604.6	59431.3	67292.9	141391	224199	146750	33610	53847.5	46723.5	113202	122963	110270	63443	170780	44727	115478	0.0161626	0.000557491	0.11018	0.0420185	1.4286	1.3684	-0.564514	-0.504314	UP	UP	UNCHANGED	UNCHANGED
A0A445BH28	3	923.586	Uncharacterized protein	probable glutathione S-transferase		67310.3	68858.3	24266.5	122805	104025	114598	42420.7	32575	57482.7	115008	109671	92591.3	53478.4	113809	44159.4	105757	0.018	0.00340693	0.405834	0.598307	1.08959	1.25996	-0.105864	-0.276234	UP	UP	UNCHANGED	UNCHANGED
A0A444YIE4	18	2157.48	Sucrose synthase	sucrose synthase 2	P:carbohydrate metabolic process; P:cellular process	80827.5	132770	177527	260169	230868	312562	66090.2	90606.7	90714.5	362617	329365	356889	130375	267866	82470.4	349623	0.020125	3.44597e-05	0.0347212	0.175255	1.03885	2.08385	0.384289	-0.660715	UP	UP	UNCHANGED	UNCHANGED
A0A445CKC1	9	12254.9	Uncharacterized protein	protein FAR1-RELATED SEQUENCE 5-like	P:nucleobase-containing compound metabolic process; P:translation;	7344	58134.7	78160.7	119063	119581	128132	7200.5	16449.3	60574	84664	86484	150546	47879.8	122259	28074.6	107231	0.025005	0.0437268	0.529634	0.500123	1.35245	1.93339	-0.18921	-0.77015	UP	UP	UNCHANGED	UNCHANGED
A0A445EE69	6	5165.5	Uncharacterized protein	glutathione S-transferase L3		111026	139862	76945	166094	174571	177246	63386	18946.7	78481.3	136936	115114	171443	109278	172637	53604.7	141164	0.026624	0.0225488	0.133246	0.0943427	0.659741	1.39695	-0.290364	-1.02757	UP	UP	UNCHANGED	UNCHANGED
A0A445C0I2	2	1733.93	Uncharacterized protein	beta-glucosidase 12-like	P:carbohydrate metabolic process	4391.6	3858.03	18250.1	46745.4	74262.7	33145.7	5068.61	16968.1	14242.7	22372.8	27606.3	33207.8	8833.24	51384.6	12093.1	27729	0.0305452	0.0305364	0.131195	0.611674	2.54032	1.19721	-0.889942	0.453172	UP	UP	UNCHANGED	UNCHANGED
A0A445E7V8	13	7269.14	S5 DRBM domain-containing protein	40S ribosomal protein S2-4	P:translation;	180316	289782	223527	363161	379204	312159	235429	296755	303138	458941	406211	430258	231209	351508	278441	431803	0.0332056	0.00438352	0.0337966	0.286743	0.604362	0.633005	0.296818	0.268175	UP	UP	UNCHANGED	UNCHANGED
A0A445CD99	3	8766.55	Chlorophyll a-b binding protein, chloroplastic	chlorophyll a-b binding protein CP26, chloroplastic-like	P:generation of precursor metabolites and energy; P:cellular protein modification process; P:photosynthesis;	163620	164783	101755	390903	234180	288011	126175	75413.9	69886.1	258946	290882	260110	143386	304364	90491.6	269979	0.0332268	0.000980996	0.506235	0.1264	1.0859	1.57699	-0.172951	-0.664048	UP	UP	UNCHANGED	UNCHANGED
A0A445B7R0	8	10481.1	Uncharacterized protein	ribulose-1,5-bisphosphate carboxylase/oxygenase large subunit	P:carbohydrate metabolic process; P:biosynthetic process; P:photosynthesis;	1940.26	3483.7	3384.97	4359.57	4447.39	5237.64	2879.54	3983.51	4254.2	5465.26	6423.23	6016.63	2936.31	4681.53	3705.75	5968.37	0.0379206	0.0108968	0.0308347	0.303586	0.672976	0.687573	0.350356	0.33576	UP	UP	UNCHANGED	UNCHANGED
A0A445AFG1	9	21755.9	Uncharacterized protein	60S ribosomal protein L23	P:translation;	97317.8	108351	108427	337480	323405	328643	55056.3	102824	95667.4	154242	174796	200670	104699	329843	84516.1	176569	2.16212e-06	0.0100828	0.000400445	0.25823	1.65554	1.06293	-0.901547	-0.308945	UP	UP	DOWN	UNCHANGED
A0A445A989	2	1354.09	Lipoxygenase	linoleate 13S-lipoxygenase 2-1, chloroplastic	P:lipid metabolic process; P:biosynthetic process; P:cellular process	69044.5	81578	77604	116670	129558	131486	30246	41263	41696.2	85262.6	83480.4	89824.1	76075.5	125905	37735	86189	0.00110608	0.000321158	0.00138081	0.00188867	0.726828	1.1916	-0.546757	-1.01153	UP	UP	UNCHANGED	DOWN
A0A445E6U4	6	4018.11	Uncharacterized protein	40S ribosomal protein S23	P:translation;	87349	81613	98192.3	151179	166747	180878	22698	33018.7	53708	138255	134883	167722	89051.4	166268	36474.9	146953	0.00143475	0.00133973	0.22585	0.00703801	0.900801	2.01038	-0.178153	-1.28774	UP	UP	UNCHANGED	DOWN
A0A444XPT6	8	7159.57	Aldo_ket_red domain-containing protein	probable aldo-keto reductase 1	P:metabolic process	22878.5	19877	26875.6	60282.4	60650.3	75700.2	19251.9	12874.4	12419.9	57003.5	64307.5	41987.4	23210.4	65544.3	14848.7	54432.8	0.00149996	0.00464737	0.251892	0.0492451	1.4977	1.87414	-0.267994	-0.644429	UP	UP	UNCHANGED	DOWN
A0A445ALI9	10	1753.43	Glucose-6-phosphate 1-dehydrogenase	glucose-6-phosphate 1-dehydrogenase, cytoplasmic isoform	P:carbohydrate metabolic process; P:generation of precursor metabolites and energy	27027.2	29648.1	23391.6	43390.8	40561.5	42395.7	14216.2	13275.4	16617.7	35771.9	45040.4	50913.2	26689	42116	14703.1	43908.5	0.0015041	0.0029506	0.709803	0.00441371	0.658125	1.57838	0.0601317	-0.860123	UP	UP	UNCHANGED	DOWN
A0A445DHP6	5	6140.99	Peroxidase	peroxidase 16	P:response to stress; P:catabolic process; P:cellular process; P:response to chemical;	96432.5	107251	100939	186898	167493	157927	50590.1	59440.9	56304.1	147458	146663	126667	101541	170773	55445	140263	0.00158979	0.000309954	0.0489048	0.000346137	0.750014	1.339	-0.283947	-0.872933	UP	UP	UNCHANGED	DOWN
A0A444ZAV9	9	6071.94	Malate dehydrogenase	malate dehydrogenase, glyoxysomal	P:carbohydrate metabolic process; P:generation of precursor metabolites and energy;	47166.8	48862	55700.3	78738.9	81054.3	93856.7	36510.4	21613.9	25979.9	63156.8	71926	61387.2	50576.4	84550	28034.7	65490	0.0032081	0.0024169	0.0290449	0.0117711	0.741341	1.22406	-0.368529	-0.851249	UP	UP	UNCHANGED	DOWN
A0A445B4C1	12	7133.56	Aspartate aminotransferase	aspartate aminotransferase 1	P:biosynthetic process; P:cellular process	175007	154769	153795	278235	213595	350412	99221.5	72547.7	86013.3	310480	343323	240558	161190	280748	85927.5	298120	0.0407267	0.00246104	0.744776	0.00189908	0.800509	1.7947	0.086621	-0.907572	UP	UP	UNCHANGED	DOWN
A0A445EBP2	10	6572.95	Uncharacterized protein	heme-binding-like protein At3g10130, chloroplastic		154383	106025	142670	248805	179458	307498	90236.7	85490.3	87608	295646	295900	206027	134360	245253	87778.3	265857	0.0493863	0.00401205	0.687341	0.0334059	0.868174	1.59872	0.116379	-0.614162	UP	UP	UNCHANGED	DOWN
A0A445AV80	7	9832.44	Xyloglucan endotransglucosylase/hydrolase	probable xyloglucan endotransglucosylase/hydrolase protein 23	P:carbohydrate metabolic process; P:cellular component organization;	128218	172463	143511	322801	329120	355109	61091.3	42612.7	75773	172924	189248	157835	148064	335677	59825.7	173335	0.000326183	0.0010057	0.000267604	0.00543921	1.18085	1.53473	-0.953507	-1.30739	UP	UP	DOWN	DOWN
A0A445BUY6	19	19739.3	Uncharacterized protein	eukaryotic initiation factor 4A-10		10575.7	11050.3	11577.3	95405.4	95906.9	125993	5119.24	4251.7	3915.13	25948.1	27218.7	22570.4	11067.8	105768	4428.69	25245.7	0.00072555	0.000130457	0.0013966	0.000134877	3.25647	2.51109	-2.0668	-1.32141	UP	UP	DOWN	DOWN
A0A444Z6T1	6	26545.2	Uncharacterized protein	ADP-ribosylation factor	P:biosynthetic process; P:cellular process	46325.9	40638.9	48164.9	119606	130286	99963.6	18788.9	23005.8	17167.7	73168.6	57691.5	47299.8	45043.2	116619	19654.1	59386.6	0.0014503	0.00674246	0.00793169	0.000885178	1.37242	1.59531	-0.973588	-1.19648	UP	UP	DOWN	DOWN
A0A444ZDQ5	3	9704.53	Peroxidase	Peroxidase 15	P:response to stress; P:catabolic process; P:cellular process; P:response to chemical;	0	0	0	157513	154866	96782.3	15051	6491.77	17265.4	153130	68281.8	86598.7	-	136387	12936.1	102670	-	0.0259806	0.358322	-	-	2.98855	-0.409691	-	Unique BA2.5_Apical	UP	UNCHANGED	Unique BA0_Cotyledonary
A0A445CFP3	27	24933.8	Uncharacterized protein	eukaryotic initiation factor 4A-15		183975	194013	245861	0	0	0	119361	126751	121267	201986	200808	187837	207949	-	122460	196877	-	0.000122946	-	0.0114329	-	0.684985	-	-0.763925	Unique BA0_Apical	UP	Unique BA2.5_Cotyledonary	DOWN
A0A444XX54	5	587.183	Uncharacterized protein	elongation factor 1-gamma		25443.7	27004	26780.5	24463.4	23426.5	24557.7	29597.9	37347.8	32350.4	55814.5	55038.8	53845.9	26409.4	24149.2	33098.7	54899.7	0.020428	0.000738003	1.40998e-06	0.0448626	-0.129076	0.730023	1.18482	0.325725	UNCHANGED	UP	UP	UNCHANGED
A0A444XUY6	29	9668.77	TRANSKETOLASE_1 domain-containing protein	transketolase, chloroplastic	P:generation of precursor metabolites and energy;	42729.9	51766.4	91332.5	28808.8	28087.1	26583	35412.1	47685.5	51561	111275	110373	111793	61942.9	27826.3	44886.2	111147	0.0844372	0.000171006	4.50853e-08	0.338333	-1.15449	1.30812	1.99795	-0.464668	UNCHANGED	UP	UP	UNCHANGED
A0A445D9X3	3	1156.27	HGTP_anticodon domain-containing protein	glycine--tRNA ligase, mitochondrial 1	P:nucleobase-containing compound metabolic process; P:translation;	41432.5	38219.5	44966	39155.5	30365.5	34768	29910.3	42029.3	32221.5	62001.7	79432.3	47540.3	41539.3	34763	34720.4	62991.4	0.10155	0.0466701	0.0418866	0.179365	-0.256925	0.859373	0.857603	-0.258695	UNCHANGED	UP	UP	UNCHANGED
A0A444ZT36	3	394.647	LRRNT_2 domain-containing protein	polygalacturonase inhibitor 2		26203.6	29193.5	17158.7	36396.7	27715.9	39724.8	16173.7	21583.7	11547.1	171168	153543	101070	24185.3	34612.5	16434.8	141927	0.109838	0.00411593	0.0073579	0.169938	0.517164	3.11032	2.03578	-0.557371	UNCHANGED	UP	UP	UNCHANGED
A0A445ER05	2	2583.07	Germin-like protein	rhicadhesin receptor	P:transport; P:multicellular organism development; P:cellular process;	134431	82926.8	79169.2	70719.7	60195.2	56897.7	133454	113539	113418	226325	302194	205009	98842.4	62604.2	120137	244509	0.118891	0.0146881	0.00363785	0.325806	-0.658871	1.02521	1.96556	0.281479	UNCHANGED	UP	UP	UNCHANGED
A0A444ZRH3	4	2266.14	FAS1 domain-containing protein	fasciclin-like arabinogalactan protein 11	P:cellular process;	80371.3	85294	64226.5	156645	87101.3	109178	100528	178101	197683	280001	291385	259959	76630.6	117641	158771	277115	0.128867	0.0189267	0.00208488	0.0536849	0.618403	0.803539	1.23609	1.05095	UNCHANGED	UP	UP	UNCHANGED
A0A444ZDN9	2	798.475	Peroxidase	peroxidase A2	P:response to stress; P:catabolic process; P:cellular process; P:response to chemical;	436873	396364	327340	360182	283778	311487	335782	364806	346978	566467	553644	602526	386859	318482	349188	574212	0.154437	0.000183829	0.000663826	0.318276	-0.280595	0.717578	0.850371	-0.147802	UNCHANGED	UP	UP	UNCHANGED
A0A445AFH3	6	2840.9	NmrA domain-containing protein	NADH dehydrogenase [ubiquinone] 1 alpha subcomplex subunit 9, mitochondrial	P:biosynthetic process; P:cellular process	97703	90059	84209	93455.3	100703	100096	80110.7	89241.7	72631	158431	176964	154523	90657	98084.9	80661.1	163306	0.177496	0.000605363	0.000868106	0.181718	0.113612	1.01763	0.735477	-0.168545	UNCHANGED	UP	UP	UNCHANGED
A0A445C009	3	4140.39	Bet_v_1 domain-containing protein	MLP-like protein 34	P:response to stress	3184.12	3144.77	3346.73	3358.59	5184.08	3785.53	3840.06	3487.13	3384.63	8174.9	7515.37	5999.44	3225.21	4109.4	3570.61	7229.9	0.186192	0.00513678	0.021187	0.0843114	0.349535	1.01781	0.815049	0.146778	UNCHANGED	UP	UP	UNCHANGED
A0A444WYK7	3	2913.35	Uncharacterized protein	ras-related protein RABA1f	P:transport; P:signal transduction;	10187.6	10521	3515.57	12850.5	9272.61	15592.5	15661	11118.3	10984.1	31264.1	26435.9	24502.9	8074.74	12571.9	12587.8	27401	0.19895	0.00425077	0.00548861	0.176249	0.638713	1.1222	1.12403	0.640539	UNCHANGED	UP	UP	UNCHANGED
A0A445BNU6	13	3976.97	Lipoxygenase	seed linoleate 9S-lipoxygenase-3	P:lipid metabolic process; P:biosynthetic process; P:cellular process;	81825.7	119915	172641	97434.1	97882.3	73870.5	92523	137085	120831	194727	192636	197723	124794	89729	116813	195029	0.271272	0.00395668	0.000198789	0.799295	-0.475901	0.739483	1.12004	-0.0953451	UNCHANGED	UP	UP	UNCHANGED
A0A445D565	5	19170	Uncharacterized protein	NADH-plastoquinone oxidoreductase subunit I	P:generation of precursor metabolites and energy; P:photosynthesis;	926.276	1022.66	2237.63	376.771	1172.8	890.897	1669	2373.42	726.689	7904.37	6816.19	6356.89	1395.52	813.488	1589.7	7025.82	0.293777	0.00119779	0.000270093	0.775652	-0.778612	2.14391	3.11047	0.187951	UNCHANGED	UP	UP	UNCHANGED
A0A445B0H8	5	1621.91	Aldedh domain-containing protein	betaine aldehyde dehydrogenase 1, chloroplastic	P:metabolic process	4784.52	3296.2	17402.7	2672.5	3009.27	4555.84	2941.73	3057.97	4406.92	7246.39	8893.59	5814.42	8494.47	3412.54	3468.87	7318.13	0.32305	0.0186914	0.0212426	0.326579	-1.31568	1.07701	1.10063	-1.29206	UNCHANGED	UP	UP	UNCHANGED
A0A445C9G1	2	439.195	Peptidase A1 domain-containing protein	aspartyl protease AED3	P:catabolic process; P:protein metabolic process	255328	190831	142420	182371	142170	151110	150681	160560	157223	244910	258370	247257	196193	158550	156154	250179	0.341484	4.95445e-05	0.00205979	0.289652	-0.307331	0.679987	0.65802	-0.329298	UNCHANGED	UP	UP	UNCHANGED
A0A445A437	2	2879.8	CN hydrolase domain-containing protein	bifunctional nitrilase/nitrile hydratase NIT4A	P:catabolic process; P:cellular process; P:response to chemical	48186	94254	46582	43580.5	57605	40423.5	58418	32265	45330	78986	98538	103939	63007.3	47203	45337.7	93821	0.392334	0.0105614	0.00724832	0.366262	-0.416641	1.0492	0.991032	-0.47481	UNCHANGED	UP	UP	UNCHANGED
A0A445DAZ1	23	7534.34	6-phosphogluconate dehydrogenase, decarboxylating	6-phosphogluconate dehydrogenase, decarboxylating 3	P:carbohydrate metabolic process; P:generation of precursor metabolites and energy; P:catabolic process;	53771	52916.5	40886.8	51455.9	47849.3	34641.8	52614.3	55387.1	40112.9	90844.5	86578.1	95057.4	49191.4	44649	49371.4	90826.7	0.528515	0.00143955	0.00123412	0.97849	-0.13978	0.87944	1.02449	0.00526914	UNCHANGED	UP	UP	UNCHANGED
A0A444YZP2	3	644.776	Phosphotransferase	hexokinase-1	P:carbohydrate metabolic process; P:generation of precursor metabolites and energy; P:nucleobase-containing compound metabolic process; P:catabolic process; P:cellular homeostasis;	8554.11	11763.5	11951.6	7361.75	15085.6	15138.8	5788.38	15334.9	10198.3	26452.6	21044.5	21432.3	10756.4	12528.7	10440.5	22976.4	0.562323	0.0184182	0.0284842	0.920447	0.220043	1.13796	0.874919	-0.0429966	UNCHANGED	UP	UP	UNCHANGED
A0A444X9R4	4	743.128	Peroxidase	peroxidase 44-like	P:response to stress; P:catabolic process; P:cellular process; P:response to chemical;	86872	67784.5	117841	95682	81000.3	78132.6	75751.6	67765.1	66897	178350	188864	172394	90832.7	84938.3	70137.9	179869	0.724159	3.9404e-05	0.000197598	0.236012	-0.0967958	1.35868	1.08246	-0.373017	UNCHANGED	UP	UP	UNCHANGED
A0A444YMQ2	14	33463.3	Uncharacterized protein	probable mediator of RNA polymerase II transcription subunit 37c		24706.3	22590.2	24205.2	23481.3	25222.5	21364.8	30335.1	36990.2	29464.8	52943.4	50239.4	44728.6	23833.9	23356.2	32263.4	49303.8	0.728984	0.00734974	0.000620511	0.0266521	-0.029208	0.611803	1.07789	0.436883	UNCHANGED	UP	UP	UNCHANGED
A0A445C6Y4	16	1580.61	UBA_e1_C domain-containing protein	ubiquitin-activating enzyme E1 1	P:cellular protein modification process; P:response to stress; P:catabolic process;	66587.7	69142.9	73775.6	89071.2	91825.4	89167.4	52429.5	54735.9	46718.2	85552.1	109846	80240.6	69835.4	90021.3	51294.5	91879.7	0.000912523	0.0125604	0.849094	0.00430525	0.366308	0.840941	0.0294798	-0.445153	UNCHANGED	UP	UNCHANGED	UNCHANGED
A0A444WXS0	31	6993.43	Uncharacterized protein	heat shock 70 kDa protein, mitochondrial	P:nucleobase-containing compound metabolic process; P:response to stress; P:biosynthetic process; P:response to abiotic stimulus; P:response to chemical;	285366	290200	244881	404513	389899	387763	191058	192216	242986	308742	363337	291597	273482	394058	208753	321225	0.00140249	0.015132	0.0307381	0.0442905	0.526961	0.621788	-0.294823	-0.38965	UNCHANGED	UP	UNCHANGED	UNCHANGED
A0A444WY58	23	10482.7	Uncharacterized protein	quinone oxidoreductase PIG3 isoform X2	P:metabolic process	202050	233779	233376	356648	324598	323415	202541	197165	224063	275321	344117	326547	223068	334887	207923	315329	0.00178801	0.00842859	0.449054	0.319685	0.586187	0.600808	-0.0868171	-0.101438	UNCHANGED	UP	UNCHANGED	UNCHANGED
A0A444ZUU5	16	3946.61	UDP-glucose 6-dehydrogenase	UDP-glucose 6-dehydrogenase 4	P:biosynthetic process;	144200	124821	162921	213099	230926	207943	83832.2	107253	135513	232233	211414	180970	143980	217323	108866	208206	0.00488366	0.00923806	0.608585	0.131347	0.593965	0.935453	-0.0618301	-0.403318	UNCHANGED	UP	UNCHANGED	UNCHANGED
A0A444ZBG5	7	3983.62	Uncharacterized protein	nitrile-specifier protein 5	P:biosynthetic process; P:cellular process;	210976	178404	181335	240670	260218	265372	129279	124865	129891	251717	259678	221702	190238	255420	128012	244365	0.00709559	0.000568589	0.467822	0.00409493	0.425063	0.932764	-0.0638312	-0.571533	UNCHANGED	UP	UNCHANGED	UNCHANGED
A0A444WUY4	17	8388.47	Phosphoserine aminotransferase	phosphoserine aminotransferase 2, chloroplastic-like	P:biosynthetic process; P:cellular process;	428250	404723	372174	477856	467991	506887	394822	361873	324106	714382	684492	604553	401716	484245	360267	667809	0.0145716	0.00134838	0.00619205	0.187588	0.269562	0.890368	0.463698	-0.157107	UNCHANGED	UP	UNCHANGED	UNCHANGED
A0A445BGZ8	27	6452.45	Uncharacterized protein	chaperonin CPN60-2, mitochondrial	P:transport; P:cellular component organization;	235872	266415	273733	339480	317708	303235	181764	201569	143013	399057	399012	361361	258673	320141	175448	386477	0.0171914	0.00058189	0.0155116	0.0159599	0.307577	1.13933	0.271674	-0.560084	UNCHANGED	UP	UNCHANGED	UNCHANGED
A0A445AD89	2	512.722	Glycosyltransferase	hydroquinone glucosyltransferase		175614	128378	144330	214226	241356	192541	176854	150790	112583	256575	264568	193212	149440	216041	146742	238118	0.0281903	0.0355289	0.453596	0.913219	0.531734	0.698396	0.140375	-0.0262877	UNCHANGED	UP	UNCHANGED	UNCHANGED
A0A444Y833	7	2073.59	Protein disulfide-isomerase	protein disulfide isomerase-like 1-4	P:response to stress; P:cellular homeostasis;	112492	143359	100479	183741	141075	176290	128009	79621.6	124696	165925	188177	173820	118777	167035	110775	175974	0.0580692	0.0182175	0.575506	0.711781	0.491901	0.667726	0.0752078	-0.100616	UNCHANGED	UP	UNCHANGED	UNCHANGED
A0A445ALK5	7	721.63	Uncharacterized protein	phospholipase D alpha 1	P:lipid metabolic process; P:catabolic process; P:cellular process;	46969.1	69645	48794.6	68713	81373.4	82542.9	42439.5	53030.5	85581.4	154075	89912.5	137131	55136.2	77543.1	60350.5	127040	0.0581028	0.0451141	0.0658914	0.743691	0.491999	1.07384	0.712209	0.130365	UNCHANGED	UP	UNCHANGED	UNCHANGED
A0A445E5A7	9	8284.97	Ribosomal_S7 domain-containing protein	40S ribosomal protein S5	P:translation; P:cellular component organization;	235970	247003	189831	274076	287597	260758	135953	145945	183546	251728	251520	255910	224268	274144	155148	253053	0.0597507	0.00254713	0.0554034	0.038357	0.289707	0.705789	-0.115495	-0.531576	UNCHANGED	UP	UNCHANGED	UNCHANGED
A0A444ZYV6	13	3199.88	Glutathione peroxidase	FT-interacting protein 3	P:response to stress; P:metabolic process; P:cellular process; P:response to chemical;	143681	179275	192726	257544	197066	243728	119619	135569	125761	214754	211986	221834	171894	232779	126983	216191	0.0601192	8.41189e-05	0.421294	0.0430003	0.437442	0.767677	-0.106653	-0.436888	UNCHANGED	UP	UNCHANGED	UNCHANGED
A0A445D3V5	28	6119.11	Pyruvate kinase	pyruvate kinase, cytosolic isozyme	P:carbohydrate metabolic process; P:generation of precursor metabolites and energy; P:nucleobase-containing compound metabolic process; P:catabolic process;	160799	184229	179848	236586	197233	279425	146038	104344	138730	320714	301759	305433	174959	237748	129704	309302	0.0645364	0.000219093	0.0428766	0.0372047	0.44242	1.25379	0.379582	-0.431791	UNCHANGED	UP	UNCHANGED	UNCHANGED
A0A445BRP0	22	13678.6	Catalase	catalase	P:response to stress; P:catabolic process; P:cellular process; P:response to chemical	506241	939074	923716	1.19034e+06	1.1265e+06	1.12774e+06	346638	635390	749867	919144	913050	1.0615e+06	789677	1.14819e+06	577298	964565	0.0666919	0.0402308	0.0255296	0.316631	0.540028	0.740562	-0.251411	-0.451946	UNCHANGED	UP	UNCHANGED	UNCHANGED
A0A445DBF2	19	6934.48	UDP-glucose 6-dehydrogenase	UDP-glucose 6-dehydrogenase 1	P:nucleobase-containing compound metabolic process; P:biosynthetic process;	67574.6	69348.6	68871	95716.6	73209.5	102279	54594	58685	45017.9	147546	133208	93235.3	68598.1	90401.6	52765.6	124663	0.0687577	0.012714	0.137367	0.0178971	0.39818	1.24036	0.463612	-0.378569	UNCHANGED	UP	UNCHANGED	UNCHANGED
A0A445A755	6	3916.3	PHB domain-containing protein	prohibitin-1, mitochondrial	P:protein metabolic process;	47084.8	41355.3	50612.3	38486.3	41285.8	34029.5	39531.1	11939.3	29331.2	50902.7	62573.8	54353.1	46350.8	37933.9	26933.9	55943.2	0.0699512	0.0296858	0.0113281	0.0842417	-0.289108	1.05454	0.560477	-0.783172	UNCHANGED	UP	UNCHANGED	UNCHANGED
A0A444YP93	22	45816.7	Fructose-bisphosphate aldolase	fructose-bisphosphate aldolase 6, cytosolic	P:carbohydrate metabolic process; P:generation of precursor metabolites and energy; P:nucleobase-containing compound metabolic process; P:catabolic process;	1.16769e+06	1.12541e+06	1.06648e+06	1.3494e+06	1.16496e+06	1.37047e+06	899747	912594	887107	1.4667e+06	1.52835e+06	1.44621e+06	1.11986e+06	1.29494e+06	899816	1.48042e+06	0.0707279	2.29371e-05	0.0565187	0.00189883	0.209566	0.718306	0.193123	-0.315616	UNCHANGED	UP	UNCHANGED	UNCHANGED
A0A444XYJ3	5	2915.26	Aminotran_1_2 domain-containing protein	probable aminotransferase TAT2	P:catabolic process; P:biosynthetic process; P:cellular process;	24575.4	23610.2	20940.1	47110.2	32789.3	70998.9	19953.3	28628	24318	102237	108165	43820.3	23041.9	50299.5	24299.8	84740.8	0.0716548	0.0431512	0.214419	0.66891	1.12628	1.80211	0.752514	0.0766833	UNCHANGED	UP	UNCHANGED	UNCHANGED
A0A445BVQ0	8	2772.49	Uncharacterized protein	ADP,ATP carrier protein, mitochondrial	P:transport;	29958.5	43407	56295.4	65248.6	73572.5	55930	24905.1	25492.1	42975.3	62028.8	60773.4	70212	43220.3	64917.1	31124.2	64338.1	0.076783	0.00742199	0.926457	0.277921	0.586888	1.04764	-0.0129247	-0.473674	UNCHANGED	UP	UNCHANGED	UNCHANGED
A0A445DL53	13	7101.13	AAA domain-containing protein	26S proteasome regulatory subunit 8 homolog A	P:nucleobase-containing compound metabolic process; P:catabolic process; P:biosynthetic process; P:cellular component organization; P:protein metabolic process;	45753.9	143951	75574.3	166531	146401	155562	31844.6	83612	114598	146640	150575	148507	88426.4	156165	76684.9	148574	0.0843081	0.0409457	0.269637	0.771499	0.820518	0.954168	-0.0718849	-0.205535	UNCHANGED	UP	UNCHANGED	UNCHANGED
A0A444Y4D9	3	1852.01	DUF3700 domain-containing protein	stem-specific protein TSJT1		53355	71553	40368.5	86191.5	66660.5	93603	50201	3117	31350.5	123640	145368	92399.3	55092.2	82151.7	28222.8	120469	0.0889506	0.0109691	0.0917311	0.1767	0.576443	2.09373	0.552304	-0.964984	UNCHANGED	UP	UNCHANGED	UNCHANGED
A0A444YWB9	4	2317.09	Epimerase domain-containing protein	3-oxo-Delta(4,5)-steroid 5-beta-reductase	P:metabolic process	67170	71176.3	66415	144060	85021.3	226105	61726	60630.3	57478.7	104433	116569	107525	68253.8	151729	59945	109509	0.111038	0.000211501	0.362037	0.0130504	1.15252	0.869335	-0.47045	-0.187269	UNCHANGED	UP	UNCHANGED	UNCHANGED
A0A445EW60	16	1819.58	Alpha-1,4 glucan phosphorylase	alpha-glucan phosphorylase, H isozyme	P:carbohydrate metabolic process; P:generation of precursor metabolites and energy; P:response to stress; P:catabolic process; P:response to abiotic stimulus; P:response to chemical;	96601.7	171944	210815	225740	235517	222683	53598.7	78326.7	113837	153857	156270	147796	159787	227980	81920.8	152641	0.113419	0.0160775	8.26659e-05	0.108528	0.512759	0.89784	-0.578766	-0.963848	UNCHANGED	UP	UNCHANGED	UNCHANGED
A0A444YS81	14	3246.98	V-type proton ATPase subunit C	V-type proton ATPase subunit C	P:transport;	352850	342747	418426	443182	396041	485197	280959	267925	265198	468293	447814	431938	371341	441474	271361	449348	0.115711	0.00010498	0.791162	0.0145094	0.249583	0.727622	0.0255072	-0.452532	UNCHANGED	UP	UNCHANGED	UNCHANGED
A0A445EVE9	4	929.054	Citrate synthase	citrate synthase, glyoxysomal	P:carbohydrate metabolic process; P:generation of precursor metabolites and energy;	52361.3	68277	91653.7	146504	108890	81101.3	36000	57618	56273.7	114522	101665	114358	70764	112165	49963.9	110182	0.134586	0.00182025	0.923588	0.195098	0.664536	1.14093	-0.0257369	-0.50213	UNCHANGED	UP	UNCHANGED	UNCHANGED
A0A445ADN6	12	3393.85	Malic enzyme	NAD-dependent malic enzyme 59 kDa isoform, mitochondrial	P:metabolic process; P:cellular process;	82236.6	90413	63679	114817	96804.2	87102.6	57805	80975.9	94984.2	122697	118927	118784	78776.2	99574.6	77921.7	120136	0.140426	0.0180379	0.0666669	0.952281	0.338017	0.62457	0.270818	-0.0157352	UNCHANGED	UP	UNCHANGED	UNCHANGED
A0A445D0R5	3	380.516	Aldedh domain-containing protein	aldehyde dehydrogenase family 2 member B7, mitochondrial isoform X2	P:metabolic process	22095.3	20513.4	49326	50346.9	55996.2	41185.9	24343.7	19822	34342.7	47991.4	45887.8	48702.3	30644.9	49176.3	26169.5	47527.2	0.146359	0.00813355	0.726661	0.686018	0.682318	0.860866	-0.0492117	-0.22776	UNCHANGED	UP	UNCHANGED	UNCHANGED
A0A445CF35	6	1481.07	Citrate synthase	citrate synthase, mitochondrial	P:carbohydrate metabolic process; P:generation of precursor metabolites and energy;	82496	73252.7	60586.5	98949.7	74525.7	92103.3	56412	46471.3	43627	103841	113639	73033.3	72111.7	88526.2	48836.8	96837.7	0.164367	0.0201129	0.59059	0.0352357	0.295871	0.9876	0.129463	-0.562266	UNCHANGED	UP	UNCHANGED	UNCHANGED
A0A445AKT4	5	1916.79	Ferritin	ferritin-2, chloroplastic	P:transport; P:response to stress; P:multicellular organism development; P:photosynthesis; P:cellular homeostasis; P:response to chemical;	57914	159466	179259	178870	184907	226634	65624	59531	136405	173554	151303	179443	132213	196804	87186.8	168100	0.185762	0.0362907	0.172211	0.373274	0.573895	0.947138	-0.227439	-0.600682	UNCHANGED	UP	UNCHANGED	UNCHANGED
A0A445BXQ0	18	1749.28	Uncharacterized protein	phosphoenolpyruvate carboxylase 2	P:generation of precursor metabolites and energy; P:multicellular organism development;	34104.4	51304.6	33555.2	50003.4	49297.5	45535.1	27347.7	30593.5	36587	53816.9	45280.8	51577.9	39654.7	48278.7	31509.4	50225.2	0.223349	0.00734131	0.539833	0.273645	0.283894	0.67263	0.0570255	-0.331711	UNCHANGED	UP	UNCHANGED	UNCHANGED
A0A445DW95	5	1248.41	Epimerase domain-containing protein	cinnamoyl-CoA reductase 1	P:metabolic process	153025	154534	74357.3	189841	203348	132582	76325.3	46713.7	54347	122383	111473	140112	127306	175257	59128.7	124656	0.23384	0.00577447	0.0950367	0.0711048	0.461179	1.07602	-0.491522	-1.10637	UNCHANGED	UP	UNCHANGED	UNCHANGED
A0A445A8R7	4	570.278	Dolichyl-diphosphooligosaccharide--protein glycosyltransferase 48 kDa subunit	dolichyl-diphosphooligosaccharide--protein glycosyltransferase 48 kDa subunit	P:cellular protein modification process; P:biosynthetic process;	53175.7	72840.3	50708.3	70080	65884.3	70632	44045.7	70085.7	45234.3	77723	84770.3	81307	58908.1	68865.4	53121.9	81266.8	0.236751	0.0321516	0.00800185	0.626819	0.225314	0.613359	0.238885	-0.14916	UNCHANGED	UP	UNCHANGED	UNCHANGED
A0A445DRP4	9	19609.4	Flavodoxin-like domain-containing protein	NAD(P)H dehydrogenase (quinone) FQR1	P:metabolic process	359498	353468	483962	415159	479175	513627	301447	198935	322337	390518	462257	402191	398976	469320	274240	418322	0.242886	0.0309486	0.233992	0.0943494	0.234272	0.609176	-0.165958	-0.540863	UNCHANGED	UP	UNCHANGED	UNCHANGED
A0A445E8V9	3	262.103	AAA domain-containing protein	hypothetical protein Ahy_A02g006164 isoform A		67470.9	102085	131346	130394	111238	143103	53809.3	80793.7	91893.6	123862	132110	117405	100301	128245	75498.9	124459	0.247475	0.0154477	0.729152	0.315826	0.354568	0.721145	-0.0432285	-0.409805	UNCHANGED	UP	UNCHANGED	UNCHANGED
A0A445AWN5	6	18751.8	Bet_v_1 domain-containing protein	pathogenesis-related protein 2-like	P:cellular protein modification process; P:response to stress; P:signal transduction; P:response to biotic stimulus; P:response to endogenous stimulus; P:response to chemical	69462.6	104046	132746	102915	137198	213323	23199.4	37520.3	65735	118283	133570	212356	102085	151145	42151.6	154736	0.259876	0.0237923	0.938523	0.0538031	0.566166	1.87615	0.0338765	-1.27611	UNCHANGED	UP	UNCHANGED	UNCHANGED
A0A445BLL2	15	12615.7	Pyruvate dehydrogenase E1 component subunit beta	pyruvate dehydrogenase E1 component subunit beta, mitochondrial	P:nucleobase-containing compound metabolic process; P:biosynthetic process	86767.7	119736	111276	108311	130758	123371	64893.3	68902.5	77157.2	104851	115256	108566	105927	120813	70317.7	109558	0.278756	0.00114584	0.196622	0.0276976	0.189711	0.639731	-0.141089	-0.591108	UNCHANGED	UP	UNCHANGED	UNCHANGED
A0A445BPS9	2	339.143	Uncharacterized protein	mitochondrial-processing peptidase subunit alpha	P:transport; P:cellular component organization; P:protein metabolic process;	358901	322099	444665	407889	410135	720232	440333	435252	436504	771611	832225	758324	375221	512752	437363	787387	0.279025	0.000104961	0.0609491	0.162465	0.450518	0.848241	0.618812	0.221089	UNCHANGED	UP	UNCHANGED	UNCHANGED
A0A445BE06	15	1438.67	Transket_pyr domain-containing protein	2-oxoglutarate dehydrogenase, mitochondrial	P:generation of precursor metabolites and energy;	49127	127244	201540	171570	186552	185444	29105.9	59797.5	107449	136901	147097	148555	125970	181189	65450.9	144184	0.280284	0.027012	0.0036305	0.289046	0.524411	1.13943	-0.32958	-0.944597	UNCHANGED	UP	UNCHANGED	UNCHANGED
A0A445DY27	2	1156.52	Glycosyltransferase	scopoletin glucosyltransferase		89675	102927	116155	146292	110163	107132	69037.5	72946	76234	123166	127979	114777	102919	121196	72739.2	121974	0.282186	0.000357554	0.955664	0.0189468	0.235829	0.745769	0.00923554	-0.500705	UNCHANGED	UP	UNCHANGED	UNCHANGED
A0A445BPL8	3	1259.88	M20_dimer domain-containing protein	IAA-amino acid hydrolase ILR1-like 4	P:metabolic process; P:cellular process;	29797.7	16435.3	29513.5	36162.2	22874.3	47497.4	16120.5	17873.1	15446.9	35039.5	43223	26205.2	25248.9	35511.3	16480.2	34822.6	0.287406	0.0209626	0.940343	0.121105	0.492061	1.07929	-0.0282558	-0.615486	UNCHANGED	UP	UNCHANGED	UNCHANGED
A0A444XG75	27	44442.7	Uncharacterized protein	actin-1		172348	170383	174596	160838	159613	176694	136385	130045	121555	212609	231564	203997	172442	165715	129328	216057	0.29841	0.00070776	0.00687079	0.000643587	-0.0574092	0.740372	0.382709	-0.415073	UNCHANGED	UP	UNCHANGED	UNCHANGED
A0A444ZLA4	24	4513.91	Uncharacterized protein	2,3-bisphosphoglycerate-independent phosphoglycerate mutase	P:carbohydrate metabolic process; P:catabolic process; P:cellular process;	232313	248272	300705	289436	270469	300907	190126	229411	187174	388370	455082	354085	260430	286938	202237	399179	0.303746	0.00379826	0.0222317	0.0783311	0.139842	0.980988	0.476299	-0.364848	UNCHANGED	UP	UNCHANGED	UNCHANGED
A0A445E7J0	3	495.505	ATP-grasp domain-containing protein	phosphoribosylamine--glycine ligase isoform X1	P:nucleobase-containing compound metabolic process; P:biosynthetic process	20323	22920	35125.5	39454.7	29831	29078.5	16891.5	14723	15091	30292	42695	39395.3	26122.8	32788.1	15568.5	37460.8	0.303886	0.00437049	0.402186	0.0840121	0.327859	1.26675	0.192211	-0.746681	UNCHANGED	UP	UNCHANGED	UNCHANGED
A0A444Z235	5	1316.27	PPIase cyclophilin-type domain-containing protein	peptidyl-prolyl cis-trans isomerase CYP38, chloroplastic	P:cellular protein modification process	178327	211165	180212	200922	192884	231172	202006	158523	141348	278894	241809	251210	189901	208326	167292	257304	0.307982	0.0132164	0.0384432	0.341362	0.133591	0.621103	0.304633	-0.182879	UNCHANGED	UP	UNCHANGED	UNCHANGED
A0A444YY24	27	23473	Uncharacterized protein	enolase	P:carbohydrate metabolic process; P:generation of precursor metabolites and energy; P:nucleobase-containing compound metabolic process; P:catabolic process;	480531	475834	371429	540997	430271	528374	331666	259167	291149	674182	675630	749680	442598	499880	293994	699831	0.315212	0.000238847	0.00963488	0.0228478	0.175585	1.25122	0.485423	-0.590211	UNCHANGED	UP	UNCHANGED	UNCHANGED
A0A445BVN0	6	589.744	Uncharacterized protein	Glutelin type-A 1		144786	128220	68495.3	145713	143657	132703	97963.7	78869.3	82011	126578	138625	134957	113834	140691	86281.3	133387	0.317173	0.00241162	0.246613	0.313369	0.305598	0.628494	-0.0769133	-0.39981	UNCHANGED	UP	UNCHANGED	UNCHANGED
A0A445AXE4	6	1210.55	TPT domain-containing protein	beta-glucosidase 46	P:carbohydrate metabolic process; P:transport;	86109.2	105748	497489	96614.1	94200	82960.3	61400	75104.5	68954.9	114925	132151	106795	229782	91258.1	68486.5	117957	0.359777	0.00426658	0.0357793	0.295168	-1.33224	0.784372	0.370238	-1.74638	UNCHANGED	UP	UNCHANGED	UNCHANGED
A0A445B8N9	3	2769.13	Uncharacterized protein	alcohol dehydrogenase 1-like	P:metabolic process;	269146	144450	191038	245902	198176	304695	66858.9	3895.06	130757	421377	405239	261430	201545	249591	67170.3	362682	0.370513	0.00919631	0.129868	0.059847	0.308465	2.43281	0.53914	-1.5852	UNCHANGED	UP	UNCHANGED	UNCHANGED
A0A445A9L1	12	871.629	Uncharacterized protein	UDP-glucuronic acid decarboxylase 6		213856	176252	156910	210039	174298	230134	150576	130759	124381	262996	260961	245802	182339	204824	135239	256587	0.390462	0.000222938	0.0396079	0.0634366	0.167756	0.923938	0.325064	-0.431118	UNCHANGED	UP	UNCHANGED	UNCHANGED
A0A444ZT56	5	7061	Uncharacterized protein	60S ribosomal protein L35a-1	P:translation;	9488.5	62638.3	136194	87628	113179	111738	8233.5	18230.5	42213.7	72956	72828.7	122132	69440.4	104182	22892.6	89305.4	0.408451	0.0261076	0.463849	0.288812	0.585254	1.96387	-0.222281	-1.6009	UNCHANGED	UP	UNCHANGED	UNCHANGED
A0A445CSS4	19	13150.9	Uncharacterized protein	tubulin alpha-3 chain	P:cell cycle; P:cellular component organization;	133371	131438	146196	132908	132096	133337	121603	103324	102234	174437	180152	170951	137002	132780	109054	175180	0.41485	0.000637286	9.69874e-05	0.0231495	-0.0451555	0.683797	0.399795	-0.329157	UNCHANGED	UP	UNCHANGED	UNCHANGED
A0A445A532	3	1120.94	Amine oxidase	primary amine oxidase	P:metabolic process;	67163.2	41347.7	14098.1	61774.6	46407.1	50579.6	26018.3	21981.9	30672.6	41523.2	47137.8	68891.4	40869.7	52920.5	26224.3	52517.4	0.493063	0.0392838	0.968274	0.398914	0.372795	1.00189	-0.0110291	-0.640128	UNCHANGED	UP	UNCHANGED	UNCHANGED
A0A445CD88	4	8699.47	Chlorophyll a-b binding protein, chloroplastic	chlorophyll a-b binding protein CP26, chloroplastic-like	P:generation of precursor metabolites and energy; P:cellular protein modification process; P:photosynthesis;	43998.5	72476.5	104756	65796.4	54278.6	61481.7	32130.7	39154.8	46485.7	98357.1	84308.6	85843.8	73743.6	60518.9	39257.1	89503.2	0.500334	0.00116996	0.00652096	0.128392	-0.285132	1.18899	0.564554	-0.909565	UNCHANGED	UP	UNCHANGED	UNCHANGED
A0A444XEU6	7	2451.39	Malic enzyme	NAD-dependent malic enzyme 62 kDa isoform, mitochondrial	P:metabolic process; P:cellular process;	85461.7	101075	65349.3	88031	118948	79006.3	39984.3	38899.3	64167.3	97585	98571.3	95614.7	83961.9	95328.6	47683.7	97257	0.514477	0.00393658	0.881339	0.0517565	0.183174	1.02831	0.0288937	-0.816239	UNCHANGED	UP	UNCHANGED	UNCHANGED
A0A445CNX2	8	2040.32	DUF4005 domain-containing protein	probable ribose-5-phosphate isomerase 3, chloroplastic	P:generation of precursor metabolites and energy	40595.8	38438.3	9910.64	36902.2	38361.7	34440.1	16929.1	17788.9	23209.4	47981.3	42683.3	46222.1	29648.3	36568	19309.1	45628.9	0.525237	0.000466345	0.00939557	0.363089	0.302633	1.24066	0.319368	-0.618664	UNCHANGED	UP	UNCHANGED	UNCHANGED
A0A444Y5S7	3	2233.07	Peroxidase	peroxidase P7	P:response to stress; P:catabolic process; P:cellular process; P:response to chemical;	151555	186420	114332	198184	182588	131078	52209	68788.5	125270	203671	157733	174234	150769	170617	82089	178546	0.53207	0.0203374	0.760765	0.0865341	0.178422	1.12103	0.0655364	-0.877076	UNCHANGED	UP	UNCHANGED	UNCHANGED
A0A444XBS7	4	1832.11	Uncharacterized protein	V-type proton ATPase subunit D	P:transport;	49500.3	99119.3	76433	104696	88441	67138.7	24274.7	57629.3	62793	79615.7	80620.3	90016	75017.6	86758.4	48232.3	83417.3	0.549766	0.0482728	0.783442	0.226236	0.209776	0.790347	-0.056657	-0.637228	UNCHANGED	UP	UNCHANGED	UNCHANGED
A0A445EC33	10	1972.55	Aldo_ket_red domain-containing protein	NADPH-dependent aldo-keto reductase, chloroplastic	P:metabolic process;	124664	74419.1	64534.4	82991.7	108543	107828	70357.4	43233	45912.4	154239	127496	84481	87872.6	99787.5	53167.6	122072	0.590939	0.0354834	0.368137	0.166025	0.183446	1.19911	0.2908	-0.724866	UNCHANGED	UP	UNCHANGED	UNCHANGED
A0A445CG11	7	1670.7	Annexin	annexin D1	P:transport; P:response to stress; P:response to abiotic stimulus; P:response to endogenous stimulus; P:response to chemical	82484.7	153669	178166	200557	157577	119607	31610.3	54335.3	120904	136497	162915	200828	138107	159247	68950	166747	0.598484	0.0401478	0.814439	0.152944	0.205484	1.27404	0.0663916	-1.00216	UNCHANGED	UP	UNCHANGED	UNCHANGED
A0A444WNM3	9	7994.98	Uncharacterized protein	allene oxide cyclase, chloroplastic	P:response to stress; P:signal transduction; P:circadian rhythm; P:biosynthetic process; P:response to light stimulus; P:response to external stimulus; P:response to biotic stimulus; P:response to endogenous stimulus; P:response to chemical	213358	173387	331326	216241	224807	210113	137908	122268	131283	236686	252702	204310	239357	217053	130486	231233	0.663788	0.00251884	0.393942	0.0842338	-0.141113	0.825448	0.0912946	-0.875266	UNCHANGED	UP	UNCHANGED	UNCHANGED
A0A445AVY7	8	1682.39	Uncharacterized protein	pyrophosphate-energized vacuolar membrane proton pump	P:transport;	52988	86406.7	119358	102711	96843.3	85090	40087.3	71204.1	87985.3	117047	107925	108313	86250.9	94881.3	66425.6	111095	0.686112	0.0357316	0.0533507	0.450783	0.137585	0.74198	0.227595	-0.376801	UNCHANGED	UP	UNCHANGED	UNCHANGED
A0A444YVR7	3	4005.51	Oxidored_q6 domain-containing protein	NADH dehydrogenase [ubiquinone] iron-sulfur protein 7, mitochondrial	P:generation of precursor metabolites and energy; P:transport; P:cellular component organization;	127118	181996	237019	181675	155775	172552	61912	96746	105583	179379	211806	220255	182044	170001	88080.3	203813	0.730685	0.00316408	0.0812942	0.0524158	-0.0987486	1.21036	0.261709	-1.0474	UNCHANGED	UP	UNCHANGED	UNCHANGED
A0A445BAT0	3	715.807	PKS_ER domain-containing protein	probable cinnamyl alcohol dehydrogenase 1	P:metabolic process	114503	105370	108578	92813	88238.3	131960	79086	71598.3	79145.7	124404	152454	116415	109484	104337	76610	131091	0.734134	0.00828256	0.20439	0.000855245	-0.069461	0.77496	0.329311	-0.51511	UNCHANGED	UP	UNCHANGED	UNCHANGED
A0A445DJW8	3	1159.84	Uncharacterized protein	dihydroxy-acid dehydratase, chloroplastic	P:biosynthetic process; P:cellular process;	92871	74716	51290	73955.7	78863.3	78464.7	61037.3	50241.5	64027	107943	115106	97288	72959	77094.6	58435.3	106779	0.750463	0.00191025	0.00537545	0.318008	0.079543	0.869718	0.469929	-0.320246	UNCHANGED	UP	UNCHANGED	UNCHANGED
A0A445DUT8	4	454.424	Uncharacterized protein	asparagine--tRNA ligase, cytoplasmic 1	P:nucleobase-containing compound metabolic process; P:translation	46133	56861	75796.3	53141.3	62754.7	71226	27845.7	71567.7	47566.3	93190	97287	81099	59596.8	62374	48993.2	90525.3	0.797416	0.0374167	0.0168787	0.527185	0.0657105	0.885739	0.537377	-0.282652	UNCHANGED	UP	UNCHANGED	UNCHANGED
A0A445E3Q0	7	3416.72	NmrA domain-containing protein	isoflavone reductase homolog PCBER	P:biosynthetic process; P:cellular process; P:secondary metabolic process; P:response to chemical	189950	138522	39133.4	141865	141651	117897	72062.1	71080	50556.5	200638	178510	196005	122535	133805	64566.2	191718	0.814484	0.000197434	0.00513783	0.265487	0.126932	1.57013	0.518858	-0.924345	UNCHANGED	UP	UNCHANGED	UNCHANGED
A0A444Z2W0	14	2344.47	Uncharacterized protein	phosphoglucomutase, cytoplasmic	P:carbohydrate metabolic process; P:generation of precursor metabolites and energy; P:catabolic process; P:biosynthetic process;	283630	222693	317995	295414	249493	263288	195847	193993	154958	287960	302763	273066	274773	269398	181599	287930	0.87082	0.00256972	0.313317	0.0393072	-0.0284976	0.664958	0.0959761	-0.59748	UNCHANGED	UP	UNCHANGED	UNCHANGED
A0A444Y3L6	15	1104.25	Uncharacterized protein	phosphoenolpyruvate carboxylase	P:generation of precursor metabolites and energy; P:multicellular organism development; P:photosynthesis;	27813.8	54478.7	59557.9	53048	46715.4	46785.9	14758.5	32625.7	38113	61666.6	67368	61542.8	47283.5	48849.8	28499.1	63525.8	0.883881	0.00869144	0.00671151	0.195778	0.0470162	1.15643	0.37899	-0.730421	UNCHANGED	UP	UNCHANGED	UNCHANGED
A0A445BP96	19	3516.66	Uncharacterized protein	probable mediator of RNA polymerase II transcription subunit 37c	P:response to stress; P:response to abiotic stimulus; P:cellular process; P:response to chemical;	35593.3	53052.7	56485.3	49945.7	51573.3	40724.7	26540	31262.3	40279.3	61206.7	45466.7	59755.7	48377.1	47414.6	32693.9	55476.3	0.901425	0.0240581	0.253697	0.108715	-0.0289946	0.762851	0.226542	-0.565304	UNCHANGED	UP	UNCHANGED	UNCHANGED
A0A444WVT0	7	622.198	Uncharacterized protein	phosphoenolpyruvate carboxykinase (ATP)	P:carbohydrate metabolic process; P:biosynthetic process;	22059	22285.7	69902.9	47399.4	37811.7	34784.8	29648.8	21013.9	27685.3	45788.3	50454.6	53318.9	38082.5	39998.7	26116	49853.9	0.9124	0.00224435	0.0881404	0.499193	0.0708214	0.932774	0.317756	-0.544197	UNCHANGED	UP	UNCHANGED	UNCHANGED
A0A445DNP8	7	1255.11	Alpha-1,4 glucan phosphorylase	alpha-1,4 glucan phosphorylase L-2 isozyme, chloroplastic/amyloplastic-like	P:carbohydrate metabolic process; P:generation of precursor metabolites and energy; P:catabolic process;	58095.4	55461.6	82835.8	66059.7	68612	59314.1	35917.9	49734.1	40721.9	77939.6	78262.6	71369	65464.2	64661.9	42124.6	75857.1	0.934338	0.00188744	0.0349535	0.0721531	-0.0177906	0.84862	0.230368	-0.636043	UNCHANGED	UP	UNCHANGED	UNCHANGED
A0A445AKN0	5	828.547	Inosine-5'-monophosphate dehydrogenase	inosine-5'-monophosphate dehydrogenase	P:nucleobase-containing compound metabolic process; P:biosynthetic process;	71472.3	66240.3	42752.7	71685.7	46495	60481.7	55697	52239.7	50907.7	99788.7	94902	75463.7	60155.1	59554.1	52948.1	90051.4	0.960654	0.00801706	0.0427831	0.465626	-0.0144862	0.76617	0.596548	-0.184108	UNCHANGED	UP	UNCHANGED	UNCHANGED
A0A445BN58	8	23773.3	Ribosomal_L7Ae domain-containing protein	60S ribosomal protein L30	0	131710	182825	271633	199076	187180	202132	110291	128197	171746	206796	212400	220715	195389	196129	136744	213304	0.986511	0.0149003	0.047942	0.260352	0.00545214	0.641426	0.121105	-0.51487	UNCHANGED	UP	UNCHANGED	UNCHANGED
A0A444WWG8	2	990.995	Thioredoxin reductase	thioredoxin reductase NTRB-like	P:response to stress; P:metabolic process; P:cellular process; P:response to chemical;	6061	15894	12734.1	15248.2	15329.9	17296.7	4575	3999.56	6137.4	6694.7	8545.02	7568.24	11563	15958.3	4903.98	7602.65	0.21359	0.0316576	0.000619132	0.0882557	0.464783	0.632548	-1.06973	-1.23749	UNCHANGED	UP	DOWN	UNCHANGED
A0A444YL50	5	1969.75	Peptidase A1 domain-containing protein	aspartyl protease family protein 2	P:catabolic process; P:response to abiotic stimulus; P:protein metabolic process;	12796.7	8418.92	11849.5	7457.87	6257.72	8200.23	4746	5695.85	4301.23	13718.3	14416.3	12115.4	11021.7	7305.27	4914.36	13416.7	0.0618783	0.000434478	0.00231175	0.0118048	-0.593335	1.44895	0.877017	-1.16527	UNCHANGED	UP	UP	DOWN
A0A444YT00	9	7383.94	Glyceraldehyde-3-phosphate dehydrogenase	glyceraldehyde-3-phosphate dehydrogenase, cytosolic	P:carbohydrate metabolic process; P:generation of precursor metabolites and energy; P:nucleobase-containing compound metabolic process; P:catabolic process;	96157	66390	69036.1	82508	70390.7	66089.9	32195.9	44445.6	45386.8	189226	144821	143521	77194.3	72996.2	40676.1	159189	0.714984	0.00161547	0.00549568	0.0247757	-0.0806735	1.96849	1.12485	-0.924313	UNCHANGED	UP	UP	DOWN
A0A445CME4	10	6755.48	Uncharacterized protein	bifunctional protein FolD 2	P:metabolic process; P:cellular process;	78232.3	79743.8	82108.1	63446.7	60852.5	70867	38124.2	28925.2	34402.8	48907.2	61148.9	58153.5	80028.1	65055.4	33817.4	56069.9	0.00951368	0.00810422	0.131592	9.0656e-05	-0.298837	0.729458	-0.214444	-1.24274	UNCHANGED	UP	UNCHANGED	DOWN
A0A444YMD0	2	23394.3	Pyruvate kinase	pyruvate kinase 1, cytosolic-like	P:carbohydrate metabolic process; P:generation of precursor metabolites and energy; P:nucleobase-containing compound metabolic process; P:catabolic process;	26628.6	30983.1	20367.3	40599.9	37263.4	39991.2	12948.7	11890.5	13577.6	32311.6	31104.7	29422.6	25993	39284.8	12805.6	30946.3	0.0149354	4.84555e-05	0.00325275	0.0134056	0.59585	1.27299	-0.344206	-1.02135	UNCHANGED	UP	UNCHANGED	DOWN
T2B9M0	15	18049.3	Fructose-bisphosphate aldolase	fructose-bisphosphate aldolase, cytoplasmic isozyme	P:carbohydrate metabolic process; P:generation of precursor metabolites and energy; P:nucleobase-containing compound metabolic process; P:catabolic process;	561282	552404	703023	474255	413712	415515	447550	355250	391604	691449	621781	551857	605570	434494	398135	621695	0.0314721	0.00990189	0.014078	0.0203896	-0.478956	0.642952	0.516871	-0.605036	UNCHANGED	UP	UNCHANGED	DOWN
A0A445BSX5	24	18043.3	Uncharacterized protein	vacuolar protein sorting-associated protein 45 homolog	P:transport; P:metabolic process; P:cellular process;	712136	805399	940295	1.08425e+06	991248	1.09738e+06	425262	316731	402969	1.12822e+06	1094123	1.1991e+06	819277	1.05763e+06	381654	1.14048e+06	0.0324863	7.43547e-05	0.142834	0.00410101	0.368409	1.5793	0.10881	-1.10209	UNCHANGED	UP	UNCHANGED	DOWN
A0A445BF10	19	4143.64	D-3-phosphoglycerate dehydrogenase	D-3-phosphoglycerate dehydrogenase 1, chloroplastic	P:biosynthetic process; P:cellular process;	264531	267401	276880	318992	282290	330035	163672	188886	162894	298412	326143	275239	269604	310439	171818	299931	0.0519265	0.00166469	0.637012	0.00046587	0.203467	0.803755	-0.0496764	-0.649964	UNCHANGED	UP	UNCHANGED	DOWN
A0A445BZ60	4	1060.13	Amine oxidase	primary amine oxidase	P:metabolic process;	70136.8	62425.3	53773.9	101937	74379.2	85052.1	37882.4	30070	38555.3	67337.5	74943.9	103947	62112	87122.8	35502.6	82076.1	0.0548772	0.0153935	0.73199	0.00817022	0.488177	1.20904	-0.0860872	-0.80695	UNCHANGED	UP	UNCHANGED	DOWN
A0A444XVW9	8	2333.8	1,2-dihydroxy-3-keto-5-methylthiopentene dioxygenase	putative acetyl-ornithine/Acetyl-lysine deacetylase	P:biosynthetic process; P:cellular process	96568	135330	106046	142149	149798	141014	78239.7	62288.7	67257	106500	109429	115815	112648	144320	69261.8	110581	0.0574619	0.00163001	0.000977242	0.0260977	0.357454	0.674978	-0.384166	-0.70169	UNCHANGED	UP	UNCHANGED	DOWN
A0A445BH25	27	6145.1	Uncharacterized protein	chaperonin CPN60-2, mitochondrial	P:transport; P:cellular component organization;	17361.9	19086.1	13120.6	12511.3	12234.4	12208.8	8085.51	7463.57	6929.69	15940.5	15074	10958	16522.9	12318.2	7492.92	13990.8	0.0769276	0.014477	0.338485	0.00745598	-0.423677	0.90088	0.183693	-1.14086	UNCHANGED	UP	UNCHANGED	DOWN
A0A445DF95	11	7220.7	Uncharacterized protein	pyruvate decarboxylase 2		48991	94238.5	101502	133566	104383	157736	14554.7	31561.3	31325.2	170448	167594	126636	81577.3	131895	25813.7	154893	0.0893156	0.00106255	0.333611	0.0325526	0.693148	2.58506	0.231882	-1.66003	UNCHANGED	UP	UNCHANGED	DOWN
A0A445CZL2	9	2112.56	PfkB domain-containing protein	probable fructokinase-7 isoform X1	P:carbohydrate metabolic process;	35735.4	43032.7	60142.6	58723.3	63282.3	67596.3	24492.3	20049	24913.1	50027.5	62642.3	49546.7	46303.6	63200.7	23151.5	54072.2	0.0924405	0.00247095	0.141596	0.0352098	0.448816	1.22378	-0.225053	-1.00002	UNCHANGED	UP	UNCHANGED	DOWN
A0A445AKQ2	12	5935.42	Uncharacterized protein	pyruvate decarboxylase 2		33556.9	83069.1	57560.4	126718	94821.1	223694	12262.6	15117.2	20481.1	239243	255496	203928	58062.1	148411	15953.6	232889	0.0939625	0.000147809	0.112332	0.043911	1.35393	3.86768	0.650042	-1.86371	UNCHANGED	UP	UNCHANGED	DOWN
A0A445AAY3	3	331.367	Uncharacterized protein	bifunctional aspartokinase/homoserine dehydrogenase 1, chloroplastic	P:biosynthetic process;	41180.3	47700	61145	38481.7	36638	40751.7	34868.3	31952.3	25966.5	46956	60189.7	46604	50008.4	38623.8	30929.1	51249.9	0.130477	0.0172295	0.0524958	0.0413571	-0.372682	0.728586	0.40806	-0.693209	UNCHANGED	UP	UNCHANGED	DOWN
A0A445A8Z5	4	3019.16	GLOBIN domain-containing protein	non-symbiotic hemoglobin 1	P:transport; P:response to chemical;	71186.7	76316.7	41309.7	100344	69625.3	110506	24497.5	19567.5	15914.7	128547	125895	146252	62937.7	93491.9	19993.2	133565	0.136562	7.78046e-05	0.0444177	0.0185202	0.570918	2.73996	0.514626	-1.65441	UNCHANGED	UP	UNCHANGED	DOWN
A0A445E1C3	37	20356.5	Aconitate hydratase	aconitate hydratase, cytoplasmic	P:generation of precursor metabolites and energy;	269248	279107	320015	306800	340278	321244	175122	200832	189118	296837	305906	253802	289456	322774	188357	285515	0.14306	0.00537288	0.118101	0.00421021	0.157179	0.600095	-0.176957	-0.619874	UNCHANGED	UP	UNCHANGED	DOWN
A0A445DV40	5	799.71	Importin N-terminal domain-containing protein	importin subunit beta-1	P:transport;	11125.1	7702.98	11367.2	8204.37	7502.2	7947.79	6215.94	7168.62	4137.54	10035.9	14578.2	9856.98	10065.1	7884.79	5840.7	11490.3	0.143585	0.034034	0.0816994	0.0465041	-0.352217	0.976209	0.543278	-0.785148	UNCHANGED	UP	UNCHANGED	DOWN
A0A444ZQ70	14	7339.53	PHB domain-containing protein	hypersensitive-induced response protein-like protein 2		69729.6	59249.7	52474.3	83496.2	78403.3	62867.2	20945.6	16850	19176.2	63833.8	70643	68278.7	60484.5	74922.2	18990.6	67585.2	0.144688	3.07941e-05	0.323238	0.00129574	0.308828	1.83142	-0.148687	-1.67128	UNCHANGED	UP	UNCHANGED	DOWN
A0A445AIW1	9	2428.9	Uncharacterized protein	alcohol dehydrogenase 1	P:catabolic process; P:cellular process; P:response to chemical;	63393.6	69543.7	66409.7	84930.5	65937.7	109571	28730.3	35865.6	40433.9	231643	204640	117083	66449	86813.2	35009.9	184455	0.185606	0.0126321	0.0568332	0.00121292	0.385666	2.39743	1.08729	-0.924483	UNCHANGED	UP	UNCHANGED	DOWN
A0A445BH36	8	1350.28	ATP-dependent 6-phosphofructokinase	ATP-dependent 6-phosphofructokinase 4, chloroplastic isoform X1	P:carbohydrate metabolic process; P:generation of precursor metabolites and energy; P:nucleobase-containing compound metabolic process; P:catabolic process;	83923.4	77300.1	89850.1	80407.1	77980.6	63570.9	50678	25699.9	53381.6	89342.9	94178.8	101283	83691.2	73986.2	43253.1	94934.8	0.203064	0.00547743	0.0291714	0.0132185	-0.17782	1.13413	0.35968	-0.952271	UNCHANGED	UP	UNCHANGED	DOWN
A0A445CSV5	11	1679.37	Glutamate dehydrogenase	glutamate dehydrogenase 1	P:metabolic process; P:cellular process	42527.6	47667.2	67827.7	42363.2	45580.5	38715.5	22658.6	18500.9	22698.5	43722.3	40504.8	44489.9	52674.2	42219.7	21286	42905.7	0.259895	0.000307806	0.78298	0.0161178	-0.319179	1.01126	0.0232512	-1.30719	UNCHANGED	UP	UNCHANGED	DOWN
A0A445BS87	3	7735.83	Cytochrome b5 heme-binding domain-containing protein	cytochrome b5	P:metabolic process;	130180	133518	136420	143384	195456	135436	63734	76590.7	88366	145368	139015	137397	133373	158092	76230.2	140594	0.261193	0.00102182	0.408709	0.0014665	0.245296	0.883095	-0.169232	-0.807032	UNCHANGED	UP	UNCHANGED	DOWN
A0A444YTD7	2	4221.87	Uncharacterized protein	heat shock cognate 70 kDa protein 2	P:response to stress; P:response to abiotic stimulus; P:cellular process; P:response to chemical;	156049	95413.9	172205	168873	173832	172151	72581.3	75217.2	44005.6	213505	117102	134776	141223	171619	63934.7	155128	0.264105	0.0434076	0.60792	0.0383904	0.281238	1.27879	-0.145752	-1.1433	UNCHANGED	UP	UNCHANGED	DOWN
A0A445B9L1	17	13188.1	Glyceraldehyde-3-phosphate dehydrogenase	Glyceraldehyde-3-phosphate dehydrogenase, cytosolic	P:carbohydrate metabolic process; P:generation of precursor metabolites and energy; P:nucleobase-containing compound metabolic process; P:catabolic process;	538751	526211	706624	670098	618901	705310	336126	343584	370576	727819	693815	694851	590529	664770	350095	705495	0.306202	2.03718e-05	0.212183	0.0152398	0.170847	1.01089	0.0857821	-0.75426	UNCHANGED	UP	UNCHANGED	DOWN
A0A444WTQ7	8	2966.41	PEROXIDASE_4 domain-containing protein	peroxidase 51	P:response to stress; P:catabolic process; P:cellular process; P:response to chemical;	109860	125923	95795.7	140747	130305	103454	46289	58600	72150	83979.3	88006	100101	110526	124836	59013	90695.4	0.367914	0.0236052	0.0479594	0.0108913	0.175642	0.619997	-0.460927	-0.905283	UNCHANGED	UP	UNCHANGED	DOWN
A0A445ETS0	3	2110.76	NmrA domain-containing protein	isoflavone reductase homolog	P:metabolic process	97787.7	92095.7	76232	92785.3	74054	79008.3	39380	65877.5	56184.3	109314	115071	119054	88705.1	81949.2	53813.9	114480	0.473337	0.00181376	0.0065926	0.0257453	-0.114287	1.08904	0.482291	-0.721037	UNCHANGED	UP	UNCHANGED	DOWN
A0A445DS99	4	943.271	Uncharacterized protein	alanine--glyoxylate aminotransferase 2 homolog 1, mitochondrial		48685.7	55847	78878.5	58051	58346	47847.3	31549	24597.7	32726	55741.3	55259	53304	61137.1	54748.1	29624.2	54768.1	0.547688	0.000681868	0.995752	0.0290255	-0.159238	0.886559	0.000526934	-1.04527	UNCHANGED	UP	UNCHANGED	DOWN
A0A445E7K7	28	28018.4	Pyruvate kinase	pyruvate kinase 1, cytosolic	P:carbohydrate metabolic process; P:generation of precursor metabolites and energy; P:nucleobase-containing compound metabolic process; P:catabolic process;	172920	138722	144164	152111	145727	181964	75654.6	74791	83925.1	156141	158663	151477	151935	159934	78123.6	155427	0.630985	2.75967e-05	0.711928	0.00256883	0.0740196	0.992409	-0.0412389	-0.959628	UNCHANGED	UP	UNCHANGED	DOWN
A0A445DCW4	10	2775.38	Uncharacterized protein	probable polygalacturonase	P:carbohydrate metabolic process; P:cellular component organization;	190364	149464	167324	150458	202345	120448	55389.1	52241.3	50336.7	92982.9	97720.9	108490	169051	157750	52655.7	99731.1	0.693777	0.000615034	0.0758215	0.000618165	-0.0998149	0.921453	-0.661527	-1.68279	UNCHANGED	UP	UNCHANGED	DOWN
A0A444X4X2	14	3469.99	Peroxidase	peroxidase P7-like	P:response to stress; P:catabolic process; P:cellular process; P:response to chemical;	304057	302405	372455	367995	346277	295969	145866	132170	136085	249909	270581	264679	326306	336747	138040	261723	0.756393	7.40649e-05	0.0277978	0.00130328	0.0454412	0.922952	-0.363625	-1.24114	UNCHANGED	UP	UNCHANGED	DOWN
A0A445D8X4	9	1720.07	Pyruvate dehydrogenase E1 component subunit alpha	pyruvate dehydrogenase E1 component subunit alpha, mitochondrial	P:nucleobase-containing compound metabolic process; P:biosynthetic process;	110750	118208	173164	133585	115377	134803	77962.6	64796.5	68437.2	153922	238302	153666	134041	127922	70398.7	181963	0.78181	0.0172099	0.134448	0.0338125	-0.0674126	1.37003	0.508386	-0.929052	UNCHANGED	UP	UNCHANGED	DOWN
A0A445C521	10	10862.2	Peroxidase	peroxidase P7	P:response to stress; P:catabolic process; P:cellular process; P:response to chemical;	307948	280125	280334	350093	291002	252247	150914	107822	125291	238780	268959	255683	289469	297781	128009	254474	0.794873	0.00115722	0.219289	0.000486377	0.040842	0.991269	-0.226733	-1.17716	UNCHANGED	UP	UNCHANGED	DOWN
A0A444X4V5	3	1592.25	Superoxide dismutase	superoxide dismutase [Mn], mitochondrial	P:reproduction; P:response to stress; P:metabolic process; P:response to external stimulus; P:response to biotic stimulus; P:embryo development; P:post-embryonic development; P:cellular process; P:response to chemical;	157402	199558	110452	227210	140379	126876	37891	37127.7	70899.3	220130	126110	238450	155804	164821	48639.3	194896	0.835218	0.016087	0.556212	0.0187478	0.0811722	2.00251	0.241804	-1.67954	UNCHANGED	UP	UNCHANGED	DOWN
A0A445CFR2	5	4015.11	NmrA domain-containing protein	isoflavone reductase		197698	200199	263460	208187	231659	216335	130259	110103	134532	207092	205073	215426	220452	218727	124964	209197	0.942777	0.000499725	0.276789	0.0138208	-0.0113372	0.743345	-0.0642692	-0.818952	UNCHANGED	UP	UNCHANGED	DOWN
A0A445BR63	8	10868.2	NmrA domain-containing protein	isoflavone reductase-like protein	P:metabolic process	443005	420189	295815	388038	411145	365007	276877	235952	251037	389613	394542	455718	386336	388064	254622	413291	0.972813	0.00288058	0.371535	0.0495009	0.00643591	0.698798	0.0908642	-0.601498	UNCHANGED	UP	UNCHANGED	DOWN
A0A445EUA8	5	798.486	Phospholipase D	phospholipase D alpha 1	P:lipid metabolic process; P:catabolic process; P:cellular process;	98621.5	136897	135417	167625	152324	187223	4594.09	5518.4	6544.21	76244.6	79160.9	79477.8	123645	169057	5552.23	78294.4	0.0476723	4.05038e-07	0.000865667	0.000706957	0.451306	3.81777	-1.11053	-4.477	UNCHANGED	UP	DOWN	DOWN
A0A445B176	2	1219.55	Peptidase A1 domain-containing protein	aspartyl protease AED3	P:catabolic process; P:protein metabolic process	60515.7	37921.2	61138.4	20413.1	16857	17799.8	19573.1	20970.4	17509.3	69634.9	89196.1	57396.9	53191.8	18356.6	19350.9	72076	0.0106785	0.00480198	0.00449813	0.0117547	-1.5349	1.89712	1.97322	-1.4588	DOWN	UP	UP	DOWN
A0A445D4K6	3	3989.76	Eukaryotic translation initiation factor 6	Eukaryotic translation initiation factor 6-2	P:transport; P:cellular component organization;	42889.6	47354.1	31608.6	26777.1	21582.3	26845	1501.43	2793.11	2405.99	7019.23	6821.46	9301.73	40617.4	25068.1	2233.51	7714.14	0.0358524	0.00342911	0.00082368	0.00122462	-0.696245	1.78819	-1.70028	-4.18471	DOWN	UP	DOWN	DOWN
A0A445EAI9	2	1054.74	Uncharacterized protein	beta-glucosidase 11	P:carbohydrate metabolic process	0	0	0	0	0	0	7259.23	3080.89	2188.28	8206.81	11113.1	11087.2	-	-	4176.13	10135.7	-	0.0315259	-	-	-	1.27921	-	-	-	UP	Unique BA2.5_Cotyledonary	Unique BA0_Cotyledonary
A0A445B0R4	15	2416.59	Pyrophosphate--fructose 6-phosphate 1-phosphotransferase subunit alpha	pyrophosphate--fructose 6-phosphate 1-phosphotransferase subunit alpha 2	P:carbohydrate metabolic process; P:generation of precursor metabolites and energy; P:nucleobase-containing compound metabolic process; P:catabolic process; P:photosynthesis;	10122.4	9364.27	15479.3	26133.1	21132.3	26611.9	0	0	0	18780.1	22189	15305.2	11655.3	24625.7	-	18758.1	0.0075781	-	0.0911463	-	1.07918	-	-0.392653	-	UP	Unique BA2.5_Cotyledonary	UNCHANGED	Unique BA0_Apical
A0A444XRQ3	11	686.903	Coatomer subunit alpha	coatomer subunit alpha-2-like	P:transport;	13681.6	30659.6	19207.7	46244.4	51924.6	43149.8	0	0	0	36802.2	32361.8	33139.3	21183	47106.3	-	34101.1	0.00994319	-	0.0111012	-	1.15302	-	-0.466101	-	UP	Unique BA2.5_Cotyledonary	UNCHANGED	Unique BA0_Apical
A0A444YN65	9	2746.05	Ribos_L4_asso_C domain-containing protein	60S ribosomal protein L4	P:translation;	964.195	10233.9	34362.7	45397.9	63707.4	58655.7	0	0	0	30159.9	24646.4	100214	15187	55920.4	-	51673.3	0.0230063	-	0.872984	-	1.88054	-	-0.113955	-	UP	Unique BA2.5_Cotyledonary	UNCHANGED	Unique BA0_Apical
A0A445BF91	19	19186.2	Tubulin alpha chain	tubulin alpha chain	P:cell cycle; P:cellular component organization;	9498.49	8204.12	11506.8	18945.6	14854.4	14778.2	0	0	0	10307.3	10507.8	9583.08	9736.47	16192.7	-	10132.7	0.0183672	-	0.0125139	-	0.733876	-	-0.676324	-	UP	Unique BA2.5_Cotyledonary	DOWN	Unique BA0_Apical
A0A444X6X7	7	4803.32	Aspartate aminotransferase	aspartate aminotransferase, cytoplasmic	P:biosynthetic process; P:cellular process	0	0	0	23588.4	18382.8	31654.7	0	0	0	33376	37471.3	27568.6	-	24542	-	32805.3	-	-	0.161101	-	-	-	0.418675	-	Unique BA2.5_Apical	Unique BA2.5_Cotyledonary	UNCHANGED	-
A0A444XTJ0	4	2707.51	Uncharacterized protein	polypyrimidine tract-binding protein homolog 3 isoform X1	P:nucleobase-containing compound metabolic process;	30770.5	37401.6	38717.9	0	0	0	0	0	0	14025.2	15864.2	16040.2	35630	-	-	15309.8	-	-	-	-	-	-	-	-	Unique BA0_Apical	Unique BA2.5_Cotyledonary	Unique BA2.5_Cotyledonary	Unique BA0_Apical
A0A445CNX6	2	566.91	Aldo_ket_red domain-containing protein	probable aldo-keto reductase 1	P:metabolic process	2468.25	820.408	798.168	0	0	0	0	0	0	4300	641.668	2583.22	1362.28	-	-	2508.3	-	-	-	-	-	-	-	-	Unique BA0_Apical	Unique BA2.5_Cotyledonary	Unique BA2.5_Cotyledonary	Unique BA0_Apical
A0A445CSM6	4	2728.01	60S ribosomal protein L6	hypothetical protein Ahy_A06g029154 isoform D	P:translation;	1889.33	7208.78	21999.1	0	0	0	0	0	0	22339.4	25630.8	49101.8	10365.7	-	-	32357.3	-	-	-	-	-	-	-	-	Unique BA0_Apical	Unique BA2.5_Cotyledonary	Unique BA2.5_Cotyledonary	Unique BA0_Apical
A0A445E8M5	2	1669.69	Uncharacterized protein	hydroxyisourate hydrolase	P:carbohydrate metabolic process;	139437	122496	579457	0	0	0	0	0	0	588189	168230	588117	280464	-	-	448179	-	-	-	-	-	-	-	-	Unique BA0_Apical	Unique BA2.5_Cotyledonary	Unique BA2.5_Cotyledonary	Unique BA0_Apical
A0A444WYB4	3	4717.74	PfkB domain-containing protein	plasma membrane H+-ATPase	P:transport; P:cellular homeostasis;	3435.38	3314.92	6758.89	3527.2	3382.22	3135.2	0	0	0	8568.64	8284.16	8335.13	4503.06	3348.2	-	8395.98	0.366166	-	3.96322e-06	-	-0.427519	-	1.32631	-	UNCHANGED	Unique BA2.5_Cotyledonary	UP	Unique BA0_Apical
A0A445ERW6	4	3039.36	Uncharacterized protein	GTP-binding protein YPTM2	P:transport; P:signal transduction;	58891	52427.7	41208.6	40790.4	34698	25469.2	0	0	0	48375.7	38032.7	39735.3	50842.4	33652.6	-	42047.9	0.0653333	-	0.200624	-	-0.595317	-	0.321318	-	UNCHANGED	Unique BA2.5_Cotyledonary	UNCHANGED	Unique BA0_Apical
A0A445D343	4	2790.86	Uncharacterized protein	probable caffeoyl-CoA O-methyltransferase At4g26220	P:metabolic process	4582.62	5321.48	1874.17	6981.34	6678.8	6077.04	0	0	0	5368.49	3398.73	4313.92	3926.09	6579.06	-	4360.38	0.0701411	-	0.024178	-	0.744788	-	-0.593428	-	UNCHANGED	Unique BA2.5_Cotyledonary	UNCHANGED	Unique BA0_Apical
A0A445A3B6	2	415.442	Aminotran_1_2 domain-containing protein	probable aminotransferase TAT2	P:catabolic process; P:biosynthetic process; P:cellular process;	3941.87	6549.31	8685.83	23451.7	11181	36489.1	0	0	0	50993.3	46593.4	27566.5	6392.34	23707.3	-	41717.7	0.0803429	-	0.153743	-	1.89091	-	0.815332	-	UNCHANGED	Unique BA2.5_Cotyledonary	UNCHANGED	Unique BA0_Apical
A0A444YVU6	7	4179.78	Uncharacterized protein	vacuolar-processing enzyme	P:nucleobase-containing compound metabolic process; P:catabolic process; P:biosynthetic process; P:protein metabolic process;	87613.7	68708.9	135389	46021.6	58198.4	46221.3	0	0	0	75725.2	71459	74297.2	97237.1	50147.1	-	73827.1	0.0806088	-	0.00494189	-	-0.955341	-	0.557984	-	UNCHANGED	Unique BA2.5_Cotyledonary	UNCHANGED	Unique BA0_Apical
A0A445CI73	5	1723.02	14_3_3 domain-containing protein	14-3-3-like protein D		3055.55	3235.73	3696.25	2894.24	2344.33	3012.1	0	0	0	2369.11	2523.23	3043.17	3329.18	2750.22	-	2645.17	0.10805	-	0.735243	-	-0.275618	-	-0.0561853	-	UNCHANGED	Unique BA2.5_Cotyledonary	UNCHANGED	Unique BA0_Apical
A0A445EF39	4	3936.38	Uncharacterized protein	photosystem II CP47 chlorophyll apoprotein	P:generation of precursor metabolites and energy; P:cellular protein modification process; P:photosynthesis;	5964.17	11461.5	16691.7	11380.5	10852.1	9734.26	0	0	0	7691.51	7676.78	6658.58	11372.4	10655.6	-	7342.29	0.83034	-	0.00505162	-	-0.0939315	-	-0.537309	-	UNCHANGED	Unique BA2.5_Cotyledonary	UNCHANGED	Unique BA0_Apical
A0A445B8L2	6	4828.93	Peroxidase	peroxidase P7	P:response to stress; P:catabolic process; P:cellular process; P:response to chemical;	63866.8	50389.9	35921.9	46560.6	50530.3	53140.4	0	0	0	47219.3	39166.8	58333.8	50059.6	50077.1	-	48240	0.998413	-	0.770187	-	0.000505502	-	-0.0539225	-	UNCHANGED	Unique BA2.5_Cotyledonary	UNCHANGED	Unique BA0_Apical
A0A444Z945	3	700.097	RmlD_sub_bind domain-containing protein	bifunctional dTDP-4-dehydrorhamnose 3,5-epimerase/dTDP-4-dehydrorhamnose reductase	P:nucleobase-containing compound metabolic process; P:biosynthetic process	0	0	0	0	0	0	0	0	0	47452.3	44673.2	38652.6	-	-	-	43592.7	-	-	-	-	-	-	-	-	-	Unique BA2.5_Cotyledonary	Unique BA2.5_Cotyledonary	-
A0A444YEA1	3	18781.2	Uncharacterized protein	pathogenesis-related protein 2-like	P:biological_process	3631.13	4515.18	2468.17	14329.7	20925.9	22326.9	5931.9	7440.12	29274.9	0	0	0	3538.16	19194.2	14215.6	-	0.00349594	-	-	0.230982	2.4396	-	-	2.00641	UP	Unique BA0_Cotyledonary	Unique BA2.5_Apical	UNCHANGED
A0A444ZNM5	4	1488.27	Uncharacterized protein	Heat shock 70 kDa 4 -like protein		0	0	0	1691.78	2814.88	1437.32	2963.22	3132.24	2414.62	0	0	0	-	1981.33	2836.7	-	-	-	-	-	-	-	-	-	Unique BA2.5_Apical	Unique BA0_Cotyledonary	Unique BA2.5_Apical	Unique BA0_Cotyledonary
A0A445ASQ8	11	1179.85	Elongation factor G, chloroplastic	elongation factor G-2, chloroplastic	P:cellular component organization;	0	0	0	6234.02	5932.16	5258.75	16589.2	18839.2	15976.4	0	0	0	-	5808.31	17134.9	-	-	-	-	-	-	-	-	-	Unique BA2.5_Apical	Unique BA0_Cotyledonary	Unique BA2.5_Apical	Unique BA0_Cotyledonary
A0A445BV01	14	6731.85	Lipoxygenase	linoleate 9S-lipoxygenase	P:lipid metabolic process; P:biosynthetic process; P:cellular process;	0	0	0	83695.7	87791	75789	28284.2	47542.7	47011.9	0	0	0	-	82425.2	40946.3	-	-	-	-	-	-	-	-	-	Unique BA2.5_Apical	Unique BA0_Cotyledonary	Unique BA2.5_Apical	Unique BA0_Cotyledonary
A0A444XUW9	11	1028.52	Uncharacterized protein	formate--tetrahydrofolate ligase	P:nucleobase-containing compound metabolic process; P:biosynthetic process;	61617.9	41202	20991.7	0	0	0	25021.5	61970.4	17204.3	0	0	0	41270.5	-	34732.1	-	-	-	-	0.736384	-	-	-	-0.248843	Unique BA0_Apical	Unique BA0_Cotyledonary	-	UNCHANGED
A0A444YVV0	7	4242.1	Uncharacterized protein	vacuolar-processing enzyme	P:nucleobase-containing compound metabolic process; P:catabolic process; P:biosynthetic process; P:protein metabolic process;	31050.1	24396.4	48072.4	0	0	0	49783	50001.4	53546.6	0	0	0	34506.3	-	51110.3	-	-	-	-	0.0810677	-	-	-	0.566754	Unique BA0_Apical	Unique BA0_Cotyledonary	-	UNCHANGED
A0A445ELC9	4	1321.62	Glutamine synthetase	glutamine synthetase leaf isozyme, chloroplastic	P:biosynthetic process; P:cellular process;	37444	31797.9	21824.4	25404	23263.3	16917.7	66009.8	71630.2	71135.2	0	0	0	30355.4	21861.7	69591.7	-	0.179632	-	-	0.00132648	-0.473552	-	-	1.19696	UNCHANGED	Unique BA0_Cotyledonary	Unique BA2.5_Apical	UP
A0A445CH39	9	11314.8	Uncharacterized protein	ubiquitin-NEDD8-like protein RUB2	P:cellular protein modification process; P:catabolic process;	17305.8	38223.6	42936.2	48551.7	30149.9	43221.3	24320.5	32112.8	59137.2	0	0	0	32821.9	40641	38523.5	-	0.460537	-	-	0.687291	0.308276	-	-	0.231081	UNCHANGED	Unique BA0_Cotyledonary	Unique BA2.5_Apical	UNCHANGED
A0A445CLD1	2	2958.54	Uncharacterized protein	ras-related protein RABA4d	P:transport; P:signal transduction;	22218.2	19237.4	26614.9	16244.9	14285.3	4395.69	10325.9	6956.6	5016.04	0	0	0	22690.2	11642	7432.85	-	0.0599649	-	-	0.00448486	-0.962734	-	-	-1.61008	UNCHANGED	Unique BA0_Cotyledonary	Unique BA2.5_Apical	DOWN
A0A445AXL4	3	1111.13	Uncharacterized protein	L-ascorbate oxidase homolog	P:carbohydrate metabolic process; P:nucleobase-containing compound metabolic process; P:transport;	81785.5	70040	61475.8	50434.2	29013.9	27030.5	98178.1	126647	81130.3	0	0	0	71100.4	35492.9	101985	-	0.0201748	-	-	0.100596	-1.00233	-	-	0.520428	DOWN	Unique BA0_Cotyledonary	Unique BA2.5_Apical	UNCHANGED
A0A444ZQF9	10	3674.49	Uncharacterized protein	subtilisin-like protease Glyma18g48580	P:protein metabolic process;	362404	297258	331166	83690.2	94050.6	64567.9	148044	147863	156836	0	0	0	330276	80769.6	150915	-	0.000271603	-	-	0.000708324	-2.03179	-	-	-1.12994	DOWN	Unique BA0_Cotyledonary	Unique BA2.5_Apical	DOWN
A0A444XUU3	4	348.315	Uncharacterized protein	alpha-xylosidase 1	P:carbohydrate metabolic process; P:cellular process	0	0	0	0	0	0	50076.6	50349	44521.6	0	0	0	-	-	48315.8	-	-	-	-	-	-	-	-	-	-	Unique BA0_Cotyledonary	-	Unique BA0_Cotyledonary
A0A444ZIA2	2	6020.7	PEROXIDASE_4 domain-containing protein	peroxidase 16	P:response to stress; P:catabolic process; P:cellular process; P:response to chemical;	0	0	0	0	0	0	15865.6	11000.3	18124.1	0	0	0	-	-	14996.7	-	-	-	-	-	-	-	-	-	-	Unique BA0_Cotyledonary	-	Unique BA0_Cotyledonary
A0A445BXG9	9	2946.75	Uncharacterized protein	ADP,ATP carrier protein 1, mitochondrial	P:transport; P:response to chemical;	0	0	0	0	0	0	2167.91	2587.04	2949.54	0	0	0	-	-	2568.16	-	-	-	-	-	-	-	-	-	-	Unique BA0_Cotyledonary	-	Unique BA0_Cotyledonary
A0A445DYY0	2	1616.95	Uncharacterized protein	putative beta-glucosidase 41 isoform X1	P:carbohydrate metabolic process	0	0	0	0	0	0	8211.07	26045.1	7497.79	0	0	0	-	-	13918	-	-	-	-	-	-	-	-	-	-	Unique BA0_Cotyledonary	-	Unique BA0_Cotyledonary
A0A445DZL2	8	3957.71	Uncharacterized protein	ras-related protein RABB1b	P:transport; P:signal transduction;	0	0	0	0	0	0	6097.95	5404.37	4188.47	0	0	0	-	-	5230.26	-	-	-	-	-	-	-	-	-	-	Unique BA0_Cotyledonary	-	Unique BA0_Cotyledonary
A0A445E4W3	7	915.843	Uncharacterized protein	4-hydroxy-3-methylbut-2-en-1-yl diphosphate synthase (ferredoxin), chloroplastic	P:lipid metabolic process; P:biosynthetic process; P:cellular process;	0	0	0	0	0	0	3301.45	3635.16	3338.22	0	0	0	-	-	3424.94	-	-	-	-	-	-	-	-	-	-	Unique BA0_Cotyledonary	-	Unique BA0_Cotyledonary
A0A445EE30	2	3705.67	Uncharacterized protein	probable methyltransferase PMT2	P:metabolic process;	0	0	0	0	0	0	422.302	1147.56	603.129	0	0	0	-	-	724.332	-	-	-	-	-	-	-	-	-	-	Unique BA0_Cotyledonary	-	Unique BA0_Cotyledonary
D8KXZ2	4	1357.7	Beta-ketoacyl-ACP reductase 1-1	3-oxoacyl-[acyl-carrier-protein] reductase 4	P:lipid metabolic process; P:biosynthetic process; P:cellular process;	0	0	0	0	0	0	64926.4	75713.5	140605	0	0	0	-	-	93748.2	-	-	-	-	-	-	-	-	-	-	Unique BA0_Cotyledonary	-	Unique BA0_Cotyledonary
A0A445CL16	4	865.084	zf-GRF domain-containing protein	dirigent protein 22-like		220988	182591	135942	539910	574118	596524	308117	338387	351715	526531	342755	400682	179840	570184	332740	423323	0.000190768	0.179581	0.0606408	0.00530525	1.66471	0.347363	-0.42967	0.88768	UP	UNCHANGED	UNCHANGED	UP
A0A444XE84	3	1701.38	PKS_ER domain-containing protein	2-alkenal reductase (NADP(+)-dependent) isoform X1	P:metabolic process	2823.72	1912.35	1948.02	4974.09	5717.46	4278.5	4167.11	4195.69	3101.71	3138.19	3297.16	3597.36	2228.03	4990.02	3821.5	3344.24	0.00568518	0.282157	0.0196322	0.0270367	1.16328	-0.192463	-0.577368	0.77837	UP	UNCHANGED	UNCHANGED	UP
A0A445B020	7	3383.12	PHB domain-containing protein	hypersensitive-induced reaction 1 protein		18133.9	17630.9	21594.7	35095.4	55237.6	34955.9	32031.9	41593	34916.4	51520	38885.3	47103.2	19119.8	41763	36180.5	45836.2	0.0298002	0.107016	0.624261	0.00527584	1.12715	0.341276	0.134263	0.920141	UP	UNCHANGED	UNCHANGED	UP
A0A445BQM2	23	37844.9	Uncharacterized protein	heat shock 70 kDa protein	P:response to stress; P:metabolic process; P:response to abiotic stimulus; P:cellular process; P:response to chemical;	204214	177332	160980	354032	262573	243116	266480	259025	329935	197629	267682	280623	180842	286573	285147	248645	0.044059	0.346167	0.425812	0.0155416	0.664175	-0.197618	-0.204818	0.656975	UP	UNCHANGED	UNCHANGED	UP
A0A445D2U1	15	19303.2	Malic enzyme	NADP-dependent malic enzyme	P:metabolic process; P:cellular process;	93730	105403	112242	169869	184276	165918	163170	119395	135173	144869	157064	152057	103792	173355	139246	151330	0.000859849	0.414323	0.0290033	0.0631818	0.740037	0.120061	-0.196028	0.423948	UP	UNCHANGED	UNCHANGED	UNCHANGED
A0A444XCH2	30	3616.02	Uncharacterized protein	heat shock 70 kDa protein 15	P:metabolic process;	161180	172714	149228	305617	279837	259990	162827	241213	191942	229990	193252	259232	161041	281815	198661	227491	0.00124242	0.388001	0.0793511	0.189993	0.807321	0.195505	-0.308934	0.302881	UP	UNCHANGED	UNCHANGED	UNCHANGED
A0A445EX70	5	2056.92	Uncharacterized protein	60S ribosomal protein L7-2 isoform X1	P:nucleobase-containing compound metabolic process;	2242	12306.5	5449	55821	78503.3	76920.3	2288.5	5199	13610	28436	48703.5	114539	6665.83	70414.9	7032.5	63892.9	0.0012754	0.0958815	0.820998	0.939098	3.40102	3.18355	-0.140224	0.0772524	UP	UNCHANGED	UNCHANGED	UNCHANGED
A0A445CD40	3	352.169	Aamy domain-containing protein	1,4-alpha-glucan-branching enzyme 1, chloroplastic/amyloplastic	P:carbohydrate metabolic process; P:generation of precursor metabolites and energy; P:biosynthetic process	74203.7	201780	100093	421481	497241	530377	55686.7	162433	322510	304343	313181	519605	125359	483033	180210	379043	0.00210436	0.130323	0.250048	0.561592	1.94606	1.07268	-0.349761	0.523614	UP	UNCHANGED	UNCHANGED	UNCHANGED
A0A444ZXL4	2	1241.37	Ribosomal_L6e_N domain-containing protein	60S ribosomal protein L6	P:translation; P:cellular component organization;	1832.48	5138.26	11627.6	23159.2	31189.9	31931.4	2885	1552.67	9427.63	11358.5	10799.1	30599.9	6199.44	28760.1	4621.77	17585.9	0.00495596	0.135521	0.190096	0.696947	2.21386	1.9279	-0.709655	-0.423695	UP	UNCHANGED	UNCHANGED	UNCHANGED
A0A445AJH5	12	2318.57	Aldo_ket_red domain-containing protein	NADPH-dependent aldo-keto reductase, chloroplastic	P:metabolic process;	64187.1	58522.8	56454.6	126985	93680.9	113030	83145	107721	48355.6	134494	125137	99508.4	59721.5	111232	79740.5	119713	0.00656996	0.118263	0.583342	0.313449	0.897249	0.586199	0.106012	0.417062	UP	UNCHANGED	UNCHANGED	UNCHANGED
A0A445ACY5	7	2444.77	14_3_3 domain-containing protein	14-3-3-like protein D	P:metabolic process	25317.5	28395.2	31742.1	70190	52719.1	53251.3	39119.2	24311.8	50520.2	38592.7	38146.1	46341.6	28484.9	58720.1	37983.7	41026.8	0.0074138	0.724296	0.0489183	0.290782	1.04366	0.111185	-0.517289	0.415184	UP	UNCHANGED	UNCHANGED	UNCHANGED
A0A444YGE5	10	2310.26	MHD domain-containing protein	AP-4 complex subunit mu	P:transport;	27889.3	34180.2	22992.8	49824.5	43471	46481	17220	42913.4	42673.9	32825.2	32984.7	34602.3	28354.1	46592.2	34269.1	33470.7	0.008041	0.930047	0.00240139	0.551927	0.716532	-0.0340066	-0.477187	0.273351	UP	UNCHANGED	UNCHANGED	UNCHANGED
A0A445DLC2	4	1303.21	Uncharacterized protein	histidine kinase 3 isoform X1	P:nucleobase-containing compound metabolic process; P:cellular protein modification process; P:signal transduction;	21812.7	36156	28132	49643.7	46590	48566	15301.3	20365.5	37111.5	38509.7	19799.7	51527	28700.2	48266.6	24259.4	36612.1	0.00996542	0.336622	0.276243	0.599047	0.749962	0.593774	-0.398703	-0.242515	UP	UNCHANGED	UNCHANGED	UNCHANGED
A0A445CIG2	5	3615.71	BHLH domain-containing protein	60S ribosomal protein L8-3	P:translation; P:transport;	26220.3	53063.3	108851	172542	236300	257835	13247.7	27365	71696.3	69175.7	72155	249926	62711.5	222226	37436.3	130419	0.0106964	0.209851	0.230779	0.447469	1.82522	1.80064	-0.768875	-0.744292	UP	UNCHANGED	UNCHANGED	UNCHANGED
A0A445C4I2	2	249.927	Uncharacterized protein	ubiquitin carboxyl-terminal hydrolase 12-like isoform X1	P:cellular protein modification process; P:catabolic process;	9021	8419	12312	43859.5	59456.5	30986.5	5595.5	5810	10362	9622	8285	52767	9917.33	44767.5	7255.83	23558	0.0138183	0.329387	0.274606	0.247993	2.17443	1.699	-0.926235	-0.450811	UP	UNCHANGED	UNCHANGED	UNCHANGED
A0A445ALA3	3	2716.15	Ribosomal_L2_C domain-containing protein	60S ribosomal protein L8-3	P:translation;	3543	15338.5	28271.4	49060.4	95548.9	76863.9	4893	7378.24	13377.8	13794.3	14742.4	67144.9	15717.6	73824.4	8549.68	31893.9	0.0190475	0.26006	0.132027	0.397429	2.23172	1.89934	-1.21082	-0.878441	UP	UNCHANGED	UNCHANGED	UNCHANGED
A0A444ZWP4	2	1312.03	40S ribosomal protein S6	40S ribosomal protein S6	P:translation;	34386	54990	87332	119646	163298	194495	17393	4935	67369.5	68846	75640.5	155133	58902.7	159146	29899.2	99873.2	0.0196759	0.105963	0.167405	0.302421	1.43395	1.73999	-0.672186	-0.978228	UP	UNCHANGED	UNCHANGED	UNCHANGED
A0A445CM51	6	2479.87	Uncharacterized protein	60S ribosomal protein L21-1	P:translation;	12778.5	30256	111536	148898	191986	207598	11540.5	19956.5	66132.3	75519	84747.7	241267	51523.6	182828	32543.1	133844	0.0201575	0.146851	0.435394	0.614844	1.82718	2.04013	-0.449927	-0.662882	UP	UNCHANGED	UNCHANGED	UNCHANGED
A0A445BGH5	12	4901.69	40S ribosomal protein S4	40S ribosomal protein S4-1	P:translation;	16226.3	45841.3	121986	159031	233683	224556	7541.5	21212.3	60145	79291	88319.3	245067	61351.3	205757	29632.9	137559	0.0213195	0.126597	0.310124	0.418751	1.74577	2.21478	-0.580886	-1.04989	UP	UNCHANGED	UNCHANGED	UNCHANGED
A0A444XEA3	4	7987.47	Uncharacterized protein	60S ribosomal protein L37a	P:translation; P:signal transduction;	20926.7	85824	112780	161916	199477	180255	11459.7	34890.3	112445	102967	125927	194379	73177	180549	52931.6	141091	0.0215814	0.0982404	0.252293	0.646699	1.30293	1.41443	-0.355768	-0.467262	UP	UNCHANGED	UNCHANGED	UNCHANGED
A0A444YJV3	4	6525.82	Ribosomal_L18e/L15P domain-containing protein	60S ribosomal protein L18	P:translation;	20072.2	26641	50867.2	67383.1	138487	148265	3830	19669.5	27370.5	34788.5	39923.6	144199	32526.8	118045	16956.7	72970.5	0.0345327	0.197807	0.361789	0.252323	1.85963	2.10546	-0.693949	-0.939778	UP	UNCHANGED	UNCHANGED	UNCHANGED
A0A444ZQZ6	4	1308.88	Uncharacterized protein	calreticulin-3	P:response to stress; P:signal transduction; P:response to chemical;	34020.3	55668.7	25587.3	65677.9	82937.3	62595.1	39619.7	39905.6	48092.4	58250	52426.7	68403.7	38425.4	70403.4	42539.2	59693.4	0.0434501	0.0342543	0.244936	0.683605	0.873584	0.488779	-0.238073	0.146732	UP	UNCHANGED	UNCHANGED	UNCHANGED
A0A444YIB7	4	6683.23	Ribosomal_L18e/L15P domain-containing protein	60S ribosomal protein L18	P:translation;	20072.2	26641	50867.2	57059.9	113612	121633	3830	19669.5	27370.5	31379	36010.9	130067	32526.8	97434.9	16956.7	65818.9	0.0440702	0.211564	0.452577	0.252323	1.58281	1.95665	-0.565937	-0.939778	UP	UNCHANGED	UNCHANGED	UNCHANGED
A0A444Z1W0	2	383.925	Uncharacterized protein	protein argonaute 1	P:metabolic process; P:cellular process;	10950	22725.5	21533.5	34926.5	31928	26725.5	14267.5	38778.5	40430	40908	37564.5	34120.5	18403	31193.3	31158.7	37531	0.0450845	0.503715	0.109977	0.239982	0.761297	0.268449	0.266845	0.759693	UP	UNCHANGED	UNCHANGED	UNCHANGED
A0A444ZLL1	9	6329.2	Uncharacterized protein	heat shock cognate 70 kDa protein	P:response to stress; P:response to abiotic stimulus; P:cellular process; P:response to chemical;	359312	136859	293115	630733	454254	459310	327947	265320	382498	345507	424529	496364	263095	514765	325255	422133	0.0456718	0.153947	0.270705	0.448918	0.96833	0.376129	-0.286217	0.305985	UP	UNCHANGED	UNCHANGED	UNCHANGED
A0A445D3X6	6	3203.18	Succinate--CoA ligase [ADP-forming] subunit alpha, mitochondrial	succinate--CoA ligase [ADP-forming] subunit alpha, mitochondrial	P:generation of precursor metabolites and energy; P:nucleobase-containing compound metabolic process; P:biosynthetic process;	97994.3	163931	70947.3	193267	197958	181700	164418	187472	136268	174787	182828	168642	110958	190975	162719	175419	0.0461908	0.454945	0.0702138	0.173876	0.783374	0.108421	-0.122576	0.552376	UP	UNCHANGED	UNCHANGED	UNCHANGED
A0A0A6ZDS7	9	1390.86	60s ribosomal protein L1	60S ribosomal protein L3	P:translation; P:cellular component organization;	74632.3	148907	147465	188829	236645	190345	43902.7	73964.7	91591.7	105237	59616	175296	123668	205273	69819.7	113383	0.0486589	0.297562	0.0685483	0.128795	0.731071	0.699498	-0.85634	-0.824767	UP	UNCHANGED	UNCHANGED	UNCHANGED
A0A444ZCB5	2	973.835	Uncharacterized protein	DUF1682 family protein		6420.5	18400	23973	32490.5	32639	28408	8395	12288	20176.5	19910.5	21815.5	29275.5	16264.5	31179.2	13619.8	23667.2	0.0497025	0.088935	0.0772251	0.693078	0.938856	0.797178	-0.397695	-0.256017	UP	UNCHANGED	UNCHANGED	UNCHANGED
A0A445BU41	18	9886.06	Uncharacterized protein	NADP-dependent malic enzyme isoform X2	P:metabolic process; P:cellular process;	12847.3	10252.5	11438.3	33706.4	36623.4	33077.8	17973.6	15812.7	18204.8	19575.9	19436.3	16930.7	11512.7	34469.2	17330.4	18647.7	6.51246e-05	0.3153	0.000339606	0.00553493	1.58208	0.105693	-0.886314	0.590076	UP	UNCHANGED	DOWN	UNCHANGED
A0A445EL83	6	1012.38	Glucose-1-phosphate adenylyltransferase	glucose-1-phosphate adenylyltransferase large subunit 3, chloroplastic/amyloplastic isoform X1	P:carbohydrate metabolic process; P:generation of precursor metabolites and energy; P:biosynthetic process;	49102.4	61995.3	50213.3	158582	156911	177245	58657	66801.3	61629.2	66385.3	70291.3	59713.7	53770.3	164246	62362.5	65463.4	0.00013804	0.470906	0.000164574	0.145508	1.61098	0.0700099	-1.3271	0.213868	UP	UNCHANGED	DOWN	UNCHANGED
A0A445CSH3	5	2732.15	60S ribosomal protein L6	60S ribosomal protein L6-1	P:translation;	16098.9	15335.3	33671.2	69148.5	89254.1	90481.8	9536.87	15398.4	28343.5	30552.5	29588.6	61943.5	21701.8	82961.5	17759.6	40694.9	0.00258728	0.128383	0.0290145	0.654618	1.93463	1.19625	-1.02759	-0.289214	UP	UNCHANGED	DOWN	UNCHANGED
A0A445A9X6	21	19599.5	Uncharacterized protein	actin		68709.5	33486.7	101266	195686	212147	188489	59388.3	52730.6	46518.1	37740.4	105678	34451.3	67820.8	198774	52879	59289.8	0.00324447	0.798587	0.00452742	0.49493	1.55133	0.165088	-1.74527	-0.359034	UP	UNCHANGED	DOWN	UNCHANGED
A0A444YS21	3	1425.93	Cytochrome b-c1 complex subunit Rieske, mitochondrial	cytochrome b-c1 complex subunit Rieske-4, mitochondrial	P:generation of precursor metabolites and energy;	47698.5	68476	53814	95586.5	103673	94496	28668.7	28541	61786	57164.7	48836.7	72512	56662.8	97918.5	39665.2	59504.4	0.00374857	0.203202	0.00692211	0.250602	0.789179	0.585123	-0.718584	-0.514528	UP	UNCHANGED	DOWN	UNCHANGED
A0A444ZXF0	3	754.077	Inos-1-P_synth domain-containing protein	inositol-3-phosphate synthase	P:carbohydrate metabolic process; P:lipid metabolic process; P:biosynthetic process; P:cellular process;	45605.7	35956.3	32537	62313.3	71069	58273.7	65911.3	48605.3	48792.3	40174.3	39557	29219.7	38033	63885.3	54436.3	36317	0.00894444	0.0549531	0.00601866	0.0775017	0.748233	-0.583925	-0.81484	0.517318	UP	UNCHANGED	DOWN	UNCHANGED
A0A445CFQ1	30	24965.5	Uncharacterized protein	eukaryotic initiation factor 4A-2-like	P:nucleobase-containing compound metabolic process; P:cellular protein modification process; P:signal transduction; P:response to endogenous stimulus; P:regulation of gene expression, epigenetic; P:response to chemical;	150484	148483	221451	280065	285397	301364	109534	115839	111614	97851.4	97216.7	89425.4	173473	288942	112329	94831.1	0.00966489	0.0059674	9.76995e-06	0.0639461	0.73607	-0.244296	-1.60735	-0.626983	UP	UNCHANGED	DOWN	UNCHANGED
A0A445D410	2	1744.66	Uncharacterized protein	cyanogenic beta-glucosidase isoform X1	P:carbohydrate metabolic process	3216.9	6035.75	1430.01	11079.3	12026.8	17463.9	1227.59	2492.09	5066.97	1898.89	5188.9	3629.68	3560.89	13523.4	2928.89	3572.49	0.0142239	0.685328	0.0107075	0.736703	1.92514	0.286579	-1.92045	-0.281885	UP	UNCHANGED	DOWN	UNCHANGED
A0A444XAV0	2	6258.3	Uncharacterized protein	probable mediator of RNA polymerase II transcription subunit 37c	P:response to stress; P:response to abiotic stimulus; P:cellular process; P:response to chemical;	12972	15189	17786	20079	26570	23270	13163	6218.14	12073	12279	13131	7537.73	15315.7	23306.3	10484.7	10982.6	0.026685	0.866136	0.00852634	0.132887	0.605714	0.0669289	-1.08551	-0.546721	UP	UNCHANGED	DOWN	UNCHANGED
A0A444XR10	3	1847.17	Iso_dh domain-containing protein	26S proteasome regulatory subunit 7	P:catabolic process; P:cellular process; P:protein metabolic process;	20868.5	33049.3	51377.3	60858.2	66950.1	67476.4	14928.8	32448.4	26244.6	27427.8	28959.3	25076.6	35098.4	65094.9	24540.6	27154.6	0.030214	0.64478	9.43777e-05	0.36091	0.891141	0.146024	-1.26135	-0.516234	UP	UNCHANGED	DOWN	UNCHANGED
A0A444ZKN7	11	3038.63	Peroxidase	Peroxidase 68	P:response to stress; P:catabolic process; P:cellular process; P:response to chemical;	61668.1	53979.8	47798.4	154102	151348	123055	32964.7	13707.7	22856.6	30715.2	29986.7	31387.4	54482.1	142835	23176.3	30696.4	0.00117442	0.248747	0.000350405	0.0102971	1.3905	0.405419	-2.21821	-1.23313	UP	UNCHANGED	DOWN	DOWN
A0A444YBP0	2	2080.03	Peroxidase	cationic peroxidase 1	P:response to stress; P:catabolic process; P:cellular process; P:response to chemical;	41370.1	31002.1	45772	78343	84565	62850	26062.4	18834.7	16965.8	27835.2	31422	32288.1	39381.4	75252.7	20621	30515.1	0.0100424	0.0328557	0.00247031	0.0223621	0.934229	0.56541	-1.30222	-0.9334	UP	UNCHANGED	DOWN	DOWN
A0A445DC87	10	3713.12	Uncharacterized protein	subtilisin-like protease Glyma18g48580	P:protein metabolic process;	0	0	0	94668.3	105427	70964.6	172935	173389	179541	246217	256440	250241	-	90353.3	175288	250966	-	3.22408e-05	0.000110804	-	-	0.517761	1.47384	-	Unique BA2.5_Apical	UNCHANGED	UP	Unique BA0_Cotyledonary
A0A445B2S1	5	2656.3	Uncharacterized protein	UDP-arabinopyranose mutase 1	P:nucleobase-containing compound metabolic process;	0	0	0	60372.1	49012.8	52874.5	45156.8	27352.2	45340.3	46947.7	36862.9	40009.5	-	54086.5	39283.1	41273.4	-	0.780202	0.0456766	-	-	0.0713029	-0.390057	-	Unique BA2.5_Apical	UNCHANGED	UNCHANGED	Unique BA0_Cotyledonary
A0A445CE58	2	23917.3	Pyruvate kinase	pyruvate kinase 1, cytosolic	P:carbohydrate metabolic process; P:generation of precursor metabolites and energy; P:nucleobase-containing compound metabolic process; P:catabolic process;	0	0	0	21770.5	21800.5	15053	21855.8	19453.6	16268.7	24687.5	24030.1	42177.2	-	19541.3	19192.7	30298.3	-	0.145696	0.165624	-	-	0.65868	0.632706	-	Unique BA2.5_Apical	UNCHANGED	UNCHANGED	Unique BA0_Cotyledonary
A0A445EV57	3	1474.27	Cytochrome c domain-containing protein	cytochrome c1-2, heme protein, mitochondrial	P:generation of precursor metabolites and energy; P:nucleobase-containing compound metabolic process; P:transport; P:biosynthetic process;	0	0	0	26414.6	23452.8	20287.3	15639.7	10743.2	25413.8	23271.9	19669.1	24615.1	-	23384.9	17265.5	22518.7	-	0.313314	0.726082	-	-	0.383228	-0.0544535	-	Unique BA2.5_Apical	UNCHANGED	UNCHANGED	Unique BA0_Cotyledonary
A0A445B1Z1	6	887.303	Glucose-6-phosphate 1-dehydrogenase	glucose-6-phosphate 1-dehydrogenase, cytoplasmic isoform	P:carbohydrate metabolic process; P:generation of precursor metabolites and energy	24778.4	26646.8	19274.3	0	0	0	52071	48989.1	63127.3	30208.2	39766.5	47176.9	23566.5	-	54729.1	39050.5	-	0.0740613	-	0.00296874	-	-0.486967	-	1.21557	Unique BA0_Apical	UNCHANGED	Unique BA2.5_Cotyledonary	UP
A0A445D7T0	9	10423.5	Uncharacterized protein	glutamate--glyoxylate aminotransferase 2	P:biosynthetic process	2258.72	1515.31	1602.56	0	0	0	5773.62	6996.46	6730.62	5993.62	5667.48	5934.08	1792.2	-	6500.23	5865.06	-	0.173997	-	0.000429317	-	-0.148346	-	1.85876	Unique BA0_Apical	UNCHANGED	Unique BA2.5_Cotyledonary	UP
A0A444WNH1	16	3633.72	Uncharacterized protein	Aldo/keto reductase	P:metabolic process;	79972.6	64365.3	100815	0	0	0	78513.3	65112.9	61758.1	96634.1	94409.2	92875.1	81717.6	-	68461.4	94639.5	-	0.00747937	-	0.32173	-	0.467151	-	-0.255357	Unique BA0_Apical	UNCHANGED	Unique BA2.5_Cotyledonary	UNCHANGED
A0A444Y1W9	2	1084.93	Uncharacterized protein	beta-glucosidase 12-like	P:carbohydrate metabolic process;	17991.1	2702.44	7209.63	0	0	0	1399.88	4440.34	1278.27	9899.76	3794.76	16634.1	9301.05	-	2372.83	10109.5	-	0.114822	-	0.210654	-	2.09103	-	-1.97078	Unique BA0_Apical	UNCHANGED	Unique BA2.5_Cotyledonary	UNCHANGED
A0A444YZ37	14	2353.24	Uncharacterized protein	nuclear pore complex protein GP210 isoform X2		4838.76	7029.14	4822.4	0	0	0	7706.05	8087.9	8369.21	6900.8	6128.17	7230.54	5563.43	-	8054.39	6753.17	-	0.0264575	-	0.0302792	-	-0.254209	-	0.533799	Unique BA0_Apical	UNCHANGED	Unique BA2.5_Cotyledonary	UNCHANGED
A0A444Z0F7	2	1514.97	40S ribosomal protein S7	40S ribosomal protein S7	P:nucleobase-containing compound metabolic process; P:translation;	123.315	830.734	2004.38	0	0	0	2310	2652.52	5104.38	1608.79	656.917	1896.74	986.142	-	3355.63	1387.48	-	0.108708	-	0.0843098	-	-1.27411	-	1.76672	Unique BA0_Apical	UNCHANGED	Unique BA2.5_Cotyledonary	UNCHANGED
A0A444ZCQ1	5	947.211	Lipoyl-binding domain-containing protein	dihydrolipoyllysine-residue succinyltransferase component of 2-oxoglutarate dehydrogenase complex 1, mitochondrial isoform X2	P:generation of precursor metabolites and energy;	135316	102760	255632	0	0	0	93753.2	97394.3	84057.4	71347.6	103691	92609.9	164569	-	91735	89216.3	-	0.818687	-	0.193564	-	-0.040165	-	-0.843151	Unique BA0_Apical	UNCHANGED	Unique BA2.5_Cotyledonary	UNCHANGED
A0A445AX76	4	1217.95	Glutamine synthetase	glutamine synthetase leaf isozyme, chloroplastic	P:biosynthetic process; P:cellular process;	24168.4	22039.2	12554.9	0	0	0	12445.8	14651.2	14157.4	9898.5	36576.7	26687.7	19587.5	-	13751.5	24387.6	-	0.245163	-	0.183328	-	0.826565	-	-0.510351	Unique BA0_Apical	UNCHANGED	Unique BA2.5_Cotyledonary	UNCHANGED
A0A445BAI7	4	1364.4	FabA domain-containing protein	(3R)-hydroxymyristoyl-[acyl-carrier-protein] dehydratase	P:lipid metabolic process; P:biosynthetic process; P:cellular process;	17683.9	9594.21	29135.3	0	0	0	8836.36	12350.7	6167.42	22681	49761.8	16582.3	18804.5	-	9118.17	29675	-	0.118032	-	0.178569	-	1.70243	-	-1.04426	Unique BA0_Apical	UNCHANGED	Unique BA2.5_Cotyledonary	UNCHANGED
A0A445AFE6	8	21755.9	Uncharacterized protein	60S ribosomal protein L23	P:translation;	152473	169759	169879	0	0	0	65890.1	123058	114493	102210	115830	132976	164037	-	101147	117005	-	0.470178	-	0.0283007	-	0.210122	-	-0.697571	Unique BA0_Apical	UNCHANGED	Unique BA2.5_Cotyledonary	DOWN
A0A445DRP9	5	1434.74	Malate dehydrogenase	malate dehydrogenase 2, peroxisomal	P:carbohydrate metabolic process; P:generation of precursor metabolites and energy;	73452.5	69985.5	60860.2	50368.6	52912.2	54963.7	127058	112971	124177	75410.2	82805.6	85965	68099.4	52748.1	121402	81393.6	0.0182469	0.00166732	0.00108466	0.000731528	-0.368522	-0.576805	0.625795	0.834078	UNCHANGED	UNCHANGED	UP	UP
A0A444ZLJ1	6	4433.43	Uncharacterized protein	fasciclin-like arabinogalactan protein 10		139194	105164	51466.7	73609	52725.3	49618.7	185755	224611	164853	147630	128894	137381	98608.2	58651	191740	137968	0.207802	0.0426449	0.00102773	0.0396303	-0.749552	-0.474811	1.23411	0.95937	UNCHANGED	UNCHANGED	UP	UP
A0A444WXY5	5	2933.04	Uncharacterized protein	soluble inorganic pyrophosphatase 6, chloroplastic	P:response to stress; P:metabolic process; P:response to external stimulus; P:response to biotic stimulus; P:cellular process; P:response to chemical;	21670	10220.3	5362.31	10816.9	10936.8	5103.77	39016	28533	33291.7	27743.4	25864	14623.5	12417.5	8952.48	33613.6	22743.6	0.541883	0.0998352	0.0381317	0.0205633	-0.472019	-0.56358	1.3451	1.43667	UNCHANGED	UNCHANGED	UP	UP
A0A445DQJ5	28	52143.2	ATPase_AAA_core domain-containing protein	ribulose bisphosphate carboxylase/oxygenase activase, chloroplastic	P:response to stress; P:response to abiotic stimulus;	196843	158038	132129	188365	178163	144034	449214	366908	395867	296630	308890	337489	162337	170187	403996	314336	0.751001	0.0292692	0.0013358	0.00138566	0.0681309	-0.362033	0.885187	1.31535	UNCHANGED	UNCHANGED	UP	UP
A0A445C8P8	19	10127.6	Malic enzyme	NADP-dependent malic enzyme	P:metabolic process; P:cellular process;	45206	51514.8	55652.1	70206	76266.1	68880.5	155161	81848.4	128413	128269	96036.6	87694.3	50791	71784.2	121807	104000	0.00521233	0.511406	0.0625588	0.0304251	0.499094	-0.228016	0.534848	1.26196	UNCHANGED	UNCHANGED	UNCHANGED	UP
A0A445C2V5	7	20990.7	Fructose-bisphosphate aldolase	fructose-bisphosphate aldolase, cytoplasmic isozyme 1	P:carbohydrate metabolic process; P:generation of precursor metabolites and energy; P:nucleobase-containing compound metabolic process; P:catabolic process;	28781.2	28149	31537.5	38507.5	33631.3	41213.6	50166.2	49123.3	52486.9	31277.1	36900.8	36090.6	29489.2	37784.1	50592.1	34756.2	0.0276497	0.00142217	0.344734	0.000125756	0.357592	-0.541643	-0.120512	0.778724	UNCHANGED	UNCHANGED	UNCHANGED	UP
A0A444XB73	5	872.236	Uncharacterized protein	putative complex I intermediate-associated protein	P:cellular component organization;	51513.3	44592	38315.3	32776.3	39165.3	21428	62120	76108.3	68922.7	44329.7	51331.3	43382.7	44806.9	31123.2	69050.3	46347.9	0.100664	0.00880018	0.0574059	0.0120082	-0.525729	-0.575145	0.574512	0.623928	UNCHANGED	UNCHANGED	UNCHANGED	UP
A0A444YRR3	10	9036.69	Gp_dh_N domain-containing protein	glyceraldehyde-3-phosphate dehydrogenase A, chloroplastic	P:carbohydrate metabolic process;	251345	242814	249559	212577	246459	203170	363095	413399	396130	270493	265877	278558	247906	220735	390875	271643	0.1125	0.00143221	0.0203429	0.000673902	-0.167478	-0.524995	0.299394	0.656911	UNCHANGED	UNCHANGED	UNCHANGED	UP
A0A445B8R4	4	1632.53	Uncharacterized protein	probable lactoylglutathione lyase, chloroplastic	P:metabolic process	25350.3	20107.2	18375	22976.2	29393.2	22472.7	35192.9	30612.9	31616.8	20416.1	29654.3	29730.9	21277.5	24947.3	32474.2	26600.4	0.296503	0.15821	0.686837	0.0112403	0.229559	-0.287845	0.0925628	0.609967	UNCHANGED	UNCHANGED	UNCHANGED	UP
A0A445CG54	4	1950.06	Uncharacterized protein	cytochrome c oxidase subunit 6b-1	P:generation of precursor metabolites and energy; P:transport;	82338.3	82594	42641.5	73901.7	89515	96763	147101	136357	115108	93304.3	122715	150732	69191.3	86726.6	132855	122250	0.30423	0.60758	0.118168	0.0173373	0.325884	-0.120015	0.495292	0.941191	UNCHANGED	UNCHANGED	UNCHANGED	UP
A0A445B6R7	13	7017.35	Uncharacterized protein	caffeoyl-CoA O-methyltransferase	P:biosynthetic process; P:cellular process; P:secondary metabolic process	57631.7	61072.3	56029.8	73126.2	56757	61971.1	92169.5	96027.8	88908.3	71424.4	64693.4	68669.1	58244.6	63951.4	92368.5	68262.3	0.321785	0.00105248	0.45437	0.000177301	0.134853	-0.436312	0.0941117	0.665276	UNCHANGED	UNCHANGED	UNCHANGED	UP
A0A445AAD7	41	26158.5	Uncharacterized protein	cell division cycle protein 48 homolog	P:transport; P:response to stress; P:cell cycle; P:catabolic process; P:cellular component organization; P:protein metabolic process; P:response to chemical;	99911.7	131059	89583.3	108415	114710	90332.2	185153	164990	167193	164408	152317	148494	106851	104486	172445	155073	0.877882	0.0952454	0.00442772	0.00942458	-0.0323012	-0.153191	0.569643	0.690533	UNCHANGED	UNCHANGED	UNCHANGED	UP
A0A444YIC8	11	6789.49	Uncharacterized protein	bifunctional protein FolD 2	P:metabolic process; P:cellular process;	27058.9	21138.2	18049.3	22400.5	21174.6	22356.7	39412.5	32691.1	35833.9	25866.5	28586.5	30639.2	22082.1	21977.3	35979.2	28364.1	0.970597	0.0330568	0.0113587	0.0132939	-0.00686657	-0.343097	0.368051	0.704282	UNCHANGED	UNCHANGED	UNCHANGED	UP
A0A444X1G0	6	4861.84	Peroxidase	peroxidase P7-like	P:response to stress; P:catabolic process; P:cellular process; P:response to chemical;	31245.6	24652.3	18170.5	22283.5	24775	26935.1	70754.6	37992.6	51797.5	35457.8	29542.5	43803.8	24689.5	24664.5	53514.9	36268	0.995333	0.17124	0.0559387	0.0477921	-0.00145766	-0.561242	0.55626	1.11604	UNCHANGED	UNCHANGED	UNCHANGED	UP
A0A445EP01	3	2689.11	Peroxidase	peroxidase N	P:response to stress; P:catabolic process; P:cellular process; P:response to chemical;	188811	170876	184440	142236	140323	114301	201353	194062	183369	221832	218064	230170	181376	132287	192928	223355	0.00949411	0.00860452	0.000715393	0.19889	-0.455312	0.211277	0.755672	0.0890834	UNCHANGED	UNCHANGED	UP	UNCHANGED
A0A445CEI5	18	17959.1	Phosphoglycerate kinase	phosphoglycerate kinase, chloroplastic	P:carbohydrate metabolic process; P:generation of precursor metabolites and energy; P:nucleobase-containing compound metabolic process; P:catabolic process; P:biosynthetic process; P:response to chemical;	527562	437364	439476	353128	291257	313313	735113	703527	669818	689976	566594	507065	468134	319233	702819	587878	0.0128606	0.114261	0.00912028	0.00262831	-0.552313	-0.257636	0.880909	0.586232	UNCHANGED	UNCHANGED	UP	UNCHANGED
A0A444Y9V3	23	3023.8	Serine hydroxymethyltransferase	serine hydroxymethyltransferase, mitochondrial-like	P:catabolic process; P:biosynthetic process; P:response to endogenous stimulus; P:cellular process; P:response to chemical	101151	101817	85159	75395.6	71018.1	47238.6	139098	113194	133964	135606	144359	143644	96042.2	64550.8	128752	141203	0.0377972	0.212471	0.00112783	0.0271873	-0.573234	0.133176	1.12926	0.422853	UNCHANGED	UNCHANGED	UP	UNCHANGED
A0A445CK24	12	2810.56	AAA domain-containing protein	26S proteasome regulatory subunit 10B homolog A	P:nucleobase-containing compound metabolic process; P:response to stress; P:catabolic process; P:biosynthetic process; P:cellular component organization; P:protein metabolic process; P:response to chemical;	64354.7	69281.8	53178.5	52891.8	33512.4	29512.7	54874.7	62871.2	62789.7	83002.8	86278.4	75794.9	62271.7	38639	60178.5	81692	0.0523204	0.00618315	0.00539611	0.720586	-0.688519	0.440947	1.08014	-0.0493271	UNCHANGED	UNCHANGED	UP	UNCHANGED
A0A445ABP0	5	1315.49	Uncharacterized protein	probable polygalacturonase	P:carbohydrate metabolic process; P:cellular component organization;	116927	105017	90186.3	62399.4	86853.1	44591.1	63538.3	89634.1	87027.3	100985	96316.1	111027	104044	64614.5	80066.6	102776	0.0529018	0.0723717	0.0425439	0.102075	-0.687257	0.360229	0.66957	-0.377916	UNCHANGED	UNCHANGED	UP	UNCHANGED
A0A444ZU59	2	483.552	Semialdhyde_dh domain-containing protein	Aspartate-semialdehyde dehydrogenase	P:biosynthetic process; P:cellular process	48410	52814	38913	62582.5	76484.5	57451	85524	61506.5	23334	140767	115644	90393.5	46712.3	65506	56788.2	115602	0.0551877	0.0644917	0.0326365	0.616154	0.487824	1.0255	0.819463	0.281787	UNCHANGED	UNCHANGED	UP	UNCHANGED
A0A445CWQ9	14	1470.04	AA_TRNA_LIGASE_II domain-containing protein	aspartate--tRNA ligase 2, cytoplasmic	P:nucleobase-containing compound metabolic process; P:translation;	94113.3	73973.7	63489	59474.3	48898.3	47512.3	60414.3	64788	48757.7	86113.3	102343	67164.7	77192	51961.7	57986.7	85207.1	0.0607869	0.0725381	0.0374517	0.132271	-0.571004	0.555253	0.713526	-0.41273	UNCHANGED	UNCHANGED	UP	UNCHANGED
A0A445CXA1	17	2617.47	Glycine cleavage system P protein	glycine dehydrogenase (decarboxylating), mitochondrial	P:catabolic process; P:cellular process;	133868	161618	190937	124207	121077	96748.1	195180	214816	210376	179696	168707	171982	162141	114011	206791	173462	0.0610332	0.00794901	0.00303713	0.0633673	-0.508078	-0.253552	0.60545	0.350924	UNCHANGED	UNCHANGED	UP	UNCHANGED
A0A445B448	7	4151.15	Proteasome subunit beta	proteasome subunit beta type-6	P:response to stress; P:cell death; P:catabolic process; P:response to external stimulus; P:response to biotic stimulus; P:protein metabolic process; P:response to chemical;	209426	135414	145968	108496	104060	99958.7	213194	186149	151724	204660	176214	131797	163603	104172	183689	170890	0.0628519	0.667785	0.0353266	0.528878	-0.651236	-0.104194	0.714109	0.167067	UNCHANGED	UNCHANGED	UP	UNCHANGED
A0A445A5R1	7	914.56	Uncharacterized protein	sulfite reductase [ferredoxin], chloroplastic	P:nucleobase-containing compound metabolic process; P:biosynthetic process; P:cellular component organization;	217347	199975	439865	109898	83581.3	71052.7	272707	266101	221633	201600	180556	211720	285729	88177.2	253480	197959	0.0646446	0.0397568	0.00170602	0.703599	-1.69617	-0.356674	1.16672	-0.172774	UNCHANGED	UNCHANGED	UP	UNCHANGED
A0A445BSR3	3	5832.73	UBIQUITIN_CONJUGAT_2 domain-containing protein	Ubiquitin-conjugating enzyme E2 10	P:cellular protein modification process; P:catabolic process	116378	72933.3	109712	69710	66939	54366.3	110931	179412	113550	121267	142702	111113	99674.6	63671.8	134631	125027	0.0656367	0.712416	0.00418702	0.252424	-0.646571	-0.10677	0.973516	0.433715	UNCHANGED	UNCHANGED	UP	UNCHANGED
A0A445CH92	2	3196.68	Uncharacterized protein	photosystem II 10 kDa polypeptide, chloroplastic	P:photosynthesis;	141138	124607	247884	71015	97542	50532	252002	301500	277288	217101	184293	236902	171209	73029.7	276930	212765	0.0745992	0.0376402	0.00242424	0.0622032	-1.22921	-0.380257	1.54271	0.693758	UNCHANGED	UNCHANGED	UP	UNCHANGED
A0A444YWA9	9	1916.03	Polyadenylate-binding protein	polyadenylate-binding protein 2-like		96489.4	83916.6	223730	30954.9	26736.9	26125.1	65046.7	48901.5	48516.2	46218.9	47195.5	40685.4	134712	27939	54154.8	44699.9	0.0752015	0.179111	0.00270283	0.147839	-2.26953	-0.276817	0.677992	-1.31472	UNCHANGED	UNCHANGED	UP	UNCHANGED
A0A445DIG0	16	5764.66	6-phosphogluconate dehydrogenase, decarboxylating	6-phosphogluconate dehydrogenase, decarboxylating 2, chloroplastic	P:carbohydrate metabolic process; P:generation of precursor metabolites and energy; P:response to stress; P:catabolic process; P:response to abiotic stimulus; P:response to endogenous stimulus; P:response to chemical;	138175	143932	89891.3	91335.9	79862.3	77144.4	131249	134753	160228	115522	156009	113474	123999	82780.9	142077	128335	0.0801102	0.45404	0.0349115	0.40454	-0.582963	-0.146755	0.632545	0.196336	UNCHANGED	UNCHANGED	UP	UNCHANGED
A0A445BMH6	22	3799.55	Lipoxygenase	linoleate 9S-lipoxygenase	P:lipid metabolic process; P:biosynthetic process; P:cellular process	27544.1	85354.2	100199	20276.1	17939.7	22551.2	40165.3	70785.7	66876.4	40367.4	72752.1	62907	71032.6	20255.7	59275.8	58675.5	0.0841352	0.966863	0.0165362	0.651999	-1.81016	-0.0146848	1.53443	-0.261038	UNCHANGED	UNCHANGED	UP	UNCHANGED
A0A444Z003	5	566.929	Aldedh domain-containing protein	aldehyde dehydrogenase family 2 member C4	P:metabolic process	39183.1	38307	49978.5	22053.7	37208	29031.7	36656.4	42671.2	47306.8	46837.7	49786.7	43835.7	42489.5	29431.1	42211.5	46820	0.0862803	0.261671	0.0208992	0.95709	-0.529765	0.14949	0.669782	-0.00947288	UNCHANGED	UNCHANGED	UP	UNCHANGED
A0A445D557	4	36816.6	Uncharacterized protein	Photosystem II D2 protein	P:generation of precursor metabolites and energy; P:photosynthesis;	74820.2	90626.3	130081	61934.1	70543.5	52784.1	73804.1	108166	101021	135796	126084	143859	98509.2	61753.9	94330.4	135247	0.0996176	0.0247023	0.000535786	0.840664	-0.673729	0.519798	1.13099	-0.0625354	UNCHANGED	UNCHANGED	UP	UNCHANGED
A0A445E3K4	15	2220.5	Uncharacterized protein	coatomer subunit gamma-2	P:cellular protein modification process; P:transport;	85108.7	93996	93108.7	88719.3	67551	70577.7	130669	123389	76390.7	175385	131727	146321	90737.8	75616	110150	151144	0.103233	0.126687	0.00637178	0.32323	-0.263012	0.456459	0.999162	0.279691	UNCHANGED	UNCHANGED	UP	UNCHANGED
A0A445D9V5	3	995.487	Uncharacterized protein	2,3-dimethylmalate lyase isoform X2		32486.5	20019	48317	19338.5	17775	15934.5	25449.5	47526.5	19573	29633	37463.5	37550	33607.5	17682.7	30849.7	34882.2	0.125674	0.674137	0.00357556	0.82681	-0.926447	0.177235	0.980154	-0.123528	UNCHANGED	UNCHANGED	UP	UNCHANGED
A0A444XIS0	2	833.441	Protoporphyrinogen oxidase	protoporphyrinogen oxidase 1, chloroplastic	P:biosynthetic process; P:cellular process;	39003	25213	15422	15591	13783	10521	63418	55547	28126	23548	25142	23956	26546	13298.3	49030.3	24215.3	0.131319	0.0813461	0.00218721	0.151272	-0.997249	-1.01775	0.864675	0.88518	UNCHANGED	UNCHANGED	UP	UNCHANGED
A0A445DW24	3	1808.67	Thioredoxin domain-containing protein	peroxiredoxin Q, chloroplastic	P:metabolic process; P:cellular homeostasis; P:response to chemical;	34870.5	28149.9	43533.7	29039.4	28879.2	22723.1	26428.6	29647.8	30591.8	52697.2	33328	45186.7	35518	26880.6	28889.4	43737.3	0.153641	0.0619763	0.0485596	0.2253	-0.401987	0.598323	0.702299	-0.298011	UNCHANGED	UNCHANGED	UP	UNCHANGED
A0A445EUM0	6	2074.04	Proteasome subunit alpha type	proteasome subunit alpha type-7	P:catabolic process; P:cellular process; P:protein metabolic process;	99480.7	80255	69570.7	79019.7	53191	51843.7	85470.3	46400.7	86849.7	99944.3	97957	104846	83102.1	61351.4	72906.9	100916	0.155315	0.105105	0.0120719	0.555961	-0.437788	0.469023	0.717981	-0.18883	UNCHANGED	UNCHANGED	UP	UNCHANGED
A0A444Y240	2	5065.54	Uncharacterized protein	PsbA	P:generation of precursor metabolites and energy; P:photosynthesis;	63364	71348	116750	47926	69163	31176	103873	196525	126734	91000	108272	80959	83820.8	49421.7	142378	93410.5	0.15943	0.166418	0.0317009	0.145463	-0.762165	-0.608065	0.918441	0.76434	UNCHANGED	UNCHANGED	UP	UNCHANGED
A0A445B682	5	2728.4	PHB domain-containing protein	stomatin-like protein 2, mitochondrial	P:cellular process;	43123.2	25301.3	35824.8	27473.8	21956.1	28102.1	36563.3	26315.6	16939.6	41321.3	48535.2	35461.3	34749.8	25844	26606.2	41772.6	0.182523	0.0899748	0.0200627	0.34835	-0.427175	0.650796	0.692728	-0.385242	UNCHANGED	UNCHANGED	UP	UNCHANGED
A0A444XDG9	22	19483.6	Uncharacterized protein	eukaryotic initiation factor 4A-10		352483	181410	250678	213802	183034	165799	386375	374392	330655	287424	357902	252899	261524	187545	363807	299408	0.225156	0.141601	0.0300443	0.123141	-0.479707	-0.281059	0.674878	0.47623	UNCHANGED	UNCHANGED	UP	UNCHANGED
A0A444XSB2	3	889.905	Carboxypeptidase	serine carboxypeptidase-like	P:catabolic process; P:cellular process; P:protein metabolic process;	80547.8	49686.4	42862.8	35796.8	45705.9	40401.4	96104.5	93391.1	79377.2	78962.1	91038.5	69580.7	57699	40634.7	89624.3	79860.4	0.226204	0.29392	0.00457627	0.0657741	-0.505834	-0.166409	0.974769	0.635343	UNCHANGED	UNCHANGED	UP	UNCHANGED
A0A444XBL2	5	9488.04	Uncharacterized protein	photosystem I reaction center subunit V, chloroplastic	P:generation of precursor metabolites and energy; P:photosynthesis;	124168	68609	352018	68076.7	94067	71466	234523	358816	460322	176766	194516	208735	181598	77869.9	351220	193339	0.299474	0.0748304	0.000724438	0.193148	-1.22161	-0.861245	1.31199	0.951625	UNCHANGED	UNCHANGED	UP	UNCHANGED
A0A444XYG1	15	2853.04	Plasma membrane ATPase	plasma membrane ATPase 4	P:transport; P:cellular homeostasis;	10718.7	35842.7	46625.1	17499.5	22546.3	17100.4	8931.97	39886.5	59639.8	70687.4	43980.6	46870.1	31062.1	19048.7	36152.7	53846	0.327571	0.357016	0.0157756	0.793474	-0.705462	0.574735	1.49914	0.218948	UNCHANGED	UNCHANGED	UP	UNCHANGED
A0A444ZZK7	5	2952.85	Nucleoside diphosphate kinase	nucleoside diphosphate kinase III, chloroplastic/mitochondrial	P:nucleobase-containing compound metabolic process; P:response to stress; P:biosynthetic process;	155863	105244	194061	123925	117205	130872	167059	200900	127221	188585	195875	194578	151723	124000	165060	193012	0.346782	0.261736	0.000109173	0.709997	-0.291091	0.225704	0.638349	0.121553	UNCHANGED	UNCHANGED	UP	UNCHANGED
A0A444ZWP1	5	907.824	Uncharacterized protein	Actin-3		413603	350745	50372	252255	116060	124641	331636	331584	262967	334662	331275	267937	271573	164319	308729	311292	0.42344	0.939137	0.0401902	0.761599	-0.724844	0.0119253	0.92177	0.185	UNCHANGED	UNCHANGED	UP	UNCHANGED
A0A444YD85	4	5187.08	Uncharacterized protein	probable aquaporin PIP-type 7a	P:transport; P:response to stress; P:response to abiotic stimulus; P:response to chemical;	95736.7	62013.7	58819.3	58641.3	74018	47212.3	109550	186932	89745.3	156483	161334	106893	72189.9	59957.2	128742	141570	0.435603	0.727976	0.0128055	0.151103	-0.267863	0.137027	1.23951	0.834619	UNCHANGED	UNCHANGED	UP	UNCHANGED
A0A445BRZ5	2	538.783	GHMP_kinases_N domain-containing protein	4-diphosphocytidyl-2-C-methyl-D-erythritol kinase, chloroplastic/chromoplastic	P:lipid metabolic process; P:biosynthetic process;	40015	29567	6278	17960	16096	19334	38674	42166.5	36209	28470	34720	38030	25286.7	17796.7	39016.5	33740	0.496124	0.18433	0.00571518	0.246395	-0.50677	-0.209624	0.922853	0.625707	UNCHANGED	UNCHANGED	UP	UNCHANGED
A0A444XEA9	10	3818.37	Uncharacterized protein	2-alkenal reductase (NADP(+)-dependent)	P:metabolic process	64416	39008.2	55802.3	48647.9	47868.7	49305.8	64886.2	48828.6	36122.1	75939.5	91846.8	68773.8	53075.5	48607.5	49945.6	78853.4	0.582056	0.0548309	0.0114403	0.793332	-0.126869	0.658813	0.697995	-0.087688	UNCHANGED	UNCHANGED	UP	UNCHANGED
A0A444X9J0	3	1616.95	Uncharacterized protein	beta-glucosidase 12	P:carbohydrate metabolic process; P:response to stress; P:catabolic process; P:response to abiotic stimulus; P:cellular process; P:secondary metabolic process	4578.85	9574.05	9182.22	7245.38	5584.71	7629.99	9404.26	9129.01	9114.54	9528.03	10388.4	12314.5	7778.37	6820.02	9215.94	10743.7	0.607545	0.139188	0.0192883	0.421457	-0.189692	0.221284	0.655638	0.244662	UNCHANGED	UNCHANGED	UP	UNCHANGED
A0A444Z7K3	9	7543.13	Cysteine synthase	cysteine synthase	P:biosynthetic process; P:cellular process;	15344.6	16951	19492	16081.7	19252.2	18879.4	36961.8	19198.5	32750.1	53830.6	50745.4	30958	17262.5	18071.1	29636.8	45178	0.63329	0.157412	0.020006	0.0873895	0.0660387	0.608232	1.32194	0.779744	UNCHANGED	UNCHANGED	UP	UNCHANGED
A0A444ZR23	2	2289.95	PsaL domain-containing protein	photosystem I reaction center subunit XI, chloroplastic	P:photosynthesis;	297876	262932	63227	199602	180462	159227	376648	806675	1007777	317210	310501	315073	208012	179764	730366	314261	0.722129	0.089088	0.000340999	0.0592928	-0.210564	-1.21666	0.805865	1.81196	UNCHANGED	UNCHANGED	UP	UNCHANGED
A0A445DJZ6	2	663.629	Uncharacterized protein	L-ascorbate oxidase homolog	P:transport; P:metabolic process;	68851.4	91546.2	38080	75467	65704	44114.7	68619	84092.9	66858.9	119716	108098	84518	66159.2	61761.9	73190.2	104111	0.819517	0.0575878	0.0380945	0.690764	-0.0992257	0.508397	0.753331	0.145709	UNCHANGED	UNCHANGED	UP	UNCHANGED
A0A445EVF8	5	2565.61	Peroxidase	peroxidase 4	P:response to stress; P:catabolic process; P:cellular process; P:response to chemical;	110904	110372	151694	131046	130057	101705	162590	175631	170639	209698	241802	167459	124323	120936	169620	206319	0.849416	0.168483	0.0223339	0.0332451	-0.0398542	0.282573	0.770635	0.448208	UNCHANGED	UNCHANGED	UP	UNCHANGED
A0A444XD91	15	3611.33	Uncharacterized protein	heat shock cognate 70 kDa protein-like	P:response to stress; P:response to abiotic stimulus; P:cellular process; P:response to chemical;	6919.43	9601.4	5194.09	5360.67	9388.8	7788.01	18311.1	12350.3	33425.2	21760.8	16349.8	30045.5	7238.31	7512.49	21362.2	22718.7	0.882186	0.864009	0.0215197	0.0920133	0.0536393	0.0888198	1.59652	1.56134	UNCHANGED	UNCHANGED	UP	UNCHANGED
A0A444ZDP0	6	8926.26	Peroxidase	peroxidase A2	P:response to stress; P:catabolic process; P:cellular process; P:response to chemical;	163750	15510	15065.3	61633.6	57204.7	58221.8	148626	122018	16756.2	188757	223109	128499	64775.2	59020	95800.1	180122	0.913055	0.159351	0.0119259	0.652189	-0.134238	0.910871	1.60969	0.564586	UNCHANGED	UNCHANGED	UP	UNCHANGED
A0A444WV29	5	1391.81	Thioredoxin reductase	thioredoxin reductase NTRB-like	P:response to stress; P:metabolic process; P:cellular process; P:response to chemical;	116780	118039	120682	91353.2	86383.4	88014.5	109456	117731	120369	108291	108470	102364	118501	88583.7	115852	106375	8.74645e-05	0.0696296	0.00200708	0.489324	-0.419782	-0.123126	0.264043	-0.0326119	UNCHANGED	UNCHANGED	UNCHANGED	UNCHANGED
A0A445A8G8	17	16882.1	Fructose-bisphosphate aldolase	fructose-bisphosphate aldolase 1, chloroplastic	P:carbohydrate metabolic process; P:generation of precursor metabolites and energy; P:nucleobase-containing compound metabolic process; P:catabolic process;	967413	944491	978976	678973	720868	656568	1.06661e+06	976533	999945	854914	815266	811250	963627	685470	1.01436e+06	827143	0.000202011	0.00351453	0.0037772	0.153178	-0.491382	-0.294364	0.271045	0.0740272	UNCHANGED	UNCHANGED	UNCHANGED	UNCHANGED
A0A444YF68	14	3259.86	Lipoyl-binding domain-containing protein	dihydrolipoyllysine-residue succinyltransferase component of 2-oxoglutarate dehydrogenase complex 2, mitochondrial	P:generation of precursor metabolites and energy;	177029	177934	179389	252503	234787	256717	165368	165124	160655	205206	195568	202542	178118	248002	163716	201105	0.000492359	0.000328435	0.00302992	0.00101499	0.477523	0.296757	-0.302403	-0.121637	UNCHANGED	UNCHANGED	UNCHANGED	UNCHANGED
A0A445DMM1	7	1079.8	Fn3_like domain-containing protein	beta-xylosidase/alpha-L-arabinofuranosidase 2	P:carbohydrate metabolic process; P:catabolic process; P:cellular process;	79319.7	75712.3	78423.3	58373.7	53812	50467.3	57933	53947	56696.7	56201.3	52139.7	53916.7	77818.4	54217.7	56192.2	54085.9	0.000740742	0.27433	0.961644	0.000173857	-0.521349	-0.0551182	-0.00351078	-0.469742	UNCHANGED	UNCHANGED	UNCHANGED	UNCHANGED
A0A444ZMJ2	15	4250.99	Cysteine synthase	bifunctional L-3-cyanoalanine synthase/cysteine synthase 1, mitochondrial	P:biosynthetic process; P:cellular process;	202596	197227	212755	146838	141915	158461	196414	138086	186164	118658	135898	175929	204193	149071	173555	143495	0.00118516	0.290816	0.767959	0.173895	-0.453928	-0.274389	-0.0550013	-0.234541	UNCHANGED	UNCHANGED	UNCHANGED	UNCHANGED
A0A444WWZ3	7	4319.47	MPN domain-containing protein	26S proteasome non-ATPase regulatory subunit 14 homolog	P:cellular protein modification process; P:catabolic process;	121114	123753	114736	96770.7	89291	90712.7	104980	105171	103733	93492	100862	86937	119868	92258.1	104628	93763.7	0.0014341	0.0549831	0.761345	0.00494443	-0.377694	-0.158165	0.0233532	-0.196175	UNCHANGED	UNCHANGED	UNCHANGED	UNCHANGED
A0A445C4E1	22	2580.64	3-hydroxy-3-methylglutaryl coenzyme A reductase	T-complex protein 1 subunit eta	P:nucleobase-containing compound metabolic process; P:lipid metabolic process; P:biosynthetic process;	208457	211698	203121	183554	174490	171713	214204	190603	193304	146553	163003	184565	207758	176585	199370	164707	0.00202956	0.0595917	0.362703	0.346325	-0.234542	-0.275548	-0.100463	-0.0594564	UNCHANGED	UNCHANGED	UNCHANGED	UNCHANGED
A0A445EJG0	18	19662.9	Uncharacterized protein	malate dehydrogenase, chloroplastic	P:carbohydrate metabolic process; P:generation of precursor metabolites and energy	261751	261282	284547	190937	208945	213184	239719	207434	216616	229734	252415	191074	269193	204355	221256	224407	0.00321858	0.884274	0.354407	0.0175621	-0.397564	0.0204014	0.135041	-0.282924	UNCHANGED	UNCHANGED	UNCHANGED	UNCHANGED
A0A445EJP9	3	2674.2	Uncharacterized protein	A0A445EJP9_ARAHY Uncharacterized protein OS=Arachis hypogaea OX=3818 GN=Ahy_A01g000115 PE=4 SV=1		26626.7	27425	23879.8	19344.3	19813.4	18894.4	28109.3	17671.5	20873.5	17133.3	16180	15739.4	25977.2	19350.7	22218.1	16350.9	0.00390321	0.132694	0.00359276	0.314205	-0.424857	-0.442365	-0.243016	-0.225508	UNCHANGED	UNCHANGED	UNCHANGED	UNCHANGED
A0A444Y1Z8	42	19615.5	Tr-type G domain-containing protein	elongation factor 2 isoform X2		28893.7	29837.6	26955	38583.7	39693.2	35221.3	36933.8	35207.2	35356.7	32214	34010.5	34542	28562.1	37832.7	35832.6	33588.8	0.00430902	0.0662782	0.0490016	0.00199139	0.405533	-0.0932896	-0.171652	0.32717	UNCHANGED	UNCHANGED	UNCHANGED	UNCHANGED
A0A445BQ71	7	655.962	Coatomer subunit beta'	coatomer subunit beta'-2	P:transport;	159190	178117	183503	127461	122015	132468	149933	139371	162117	147471	155673	200027	173603	127315	150473	167724	0.00436593	0.382463	0.0716646	0.0792104	-0.447392	0.156577	0.397685	-0.206284	UNCHANGED	UNCHANGED	UNCHANGED	UNCHANGED
A0A445A372	7	959.45	Uncharacterized protein	mitochondrial-processing peptidase subunit alpha	P:transport; P:cellular component organization; P:protein metabolic process;	54461.1	48407.6	44719	66185.8	69367.2	63600.7	44102.4	40506.3	40856.6	65773.3	58765.6	57100.3	49195.9	66384.6	41821.8	60546.4	0.00642998	0.00293751	0.136254	0.0736829	0.43231	0.533787	-0.132806	-0.234284	UNCHANGED	UNCHANGED	UNCHANGED	UNCHANGED
A0A444XZY0	4	1703.98	Uncharacterized protein	beta-glucosidase 42	P:carbohydrate metabolic process; P:catabolic process; P:cellular process	289832	301330	251879	381489	351465	373136	312725	306327	314167	344118	371109	377880	281014	368697	311073	364369	0.00730775	0.00732028	0.767111	0.117959	0.391794	0.228149	-0.0170343	0.146611	UNCHANGED	UNCHANGED	UNCHANGED	UNCHANGED
A0A445E6W9	27	5885.81	TRANSKETOLASE_1 domain-containing protein	transketolase, chloroplastic	P:generation of precursor metabolites and energy;	136614	159911	167541	109527	108498	102740	154284	210345	175023	124232	122883	111996	154689	106922	179884	119704	0.00744919	0.0231988	0.044238	0.251755	-0.532814	-0.587599	0.162913	0.217699	UNCHANGED	UNCHANGED	UNCHANGED	UNCHANGED
A0A445ALB1	5	2151.59	Peroxidase	peroxidase P7-like	P:response to stress; P:catabolic process; P:cellular process; P:response to chemical;	130220	130533	138852	110110	102723	116731	74168	102595	89942.4	119024	119102	122748	133202	109855	88901.8	120291	0.00910121	0.0195105	0.0690684	0.00700748	-0.278017	0.43625	0.130938	-0.583329	UNCHANGED	UNCHANGED	UNCHANGED	UNCHANGED
A0A444WRN4	5	1957.5	Uncharacterized protein	gamma carbonic anhydrase 1, mitochondrial	P:metabolic process	121182	116478	109363	132807	130664	133822	103340	92565.7	98142	141538	146484	124883	115675	132431	98016	137635	0.00925571	0.00541734	0.474512	0.0189402	0.195169	0.489757	0.0556053	-0.238982	UNCHANGED	UNCHANGED	UNCHANGED	UNCHANGED
A0A445DJR7	6	4549.18	Fumarylacetoacetase	fumarylacetoacetase	P:catabolic process; P:cellular process	83538.3	93080.3	99112.7	72129.3	62724.3	66966.3	76598.3	89530.7	92435.7	94202.7	101526	80898.3	91910.4	67273.3	86188.2	92208.9	0.00958869	0.480906	0.0196761	0.438174	-0.450194	0.0974151	0.454871	-0.0927381	UNCHANGED	UNCHANGED	UNCHANGED	UNCHANGED
A0A445EUV7	12	11238	Ferredoxin--NADP reductase, chloroplastic	ferredoxin--NADP reductase, leaf isozyme, chloroplastic	P:metabolic process;	95294.2	86721.3	103959	70467.7	74406.4	67791.7	106128	102587	116813	89061.2	99025.8	98227.9	95324.9	70888.6	108509	95438.3	0.0101746	0.0705757	0.00275808	0.11486	-0.4273	-0.18518	0.429015	0.186895	UNCHANGED	UNCHANGED	UNCHANGED	UNCHANGED
A0A444YHE1	2	1613.91	LRRNT_2 domain-containing protein	polygalacturonase inhibitor-like		110255	95424.5	116532	76928.5	63695.5	76708.5	78032.5	80265.3	61621.5	121348	122143	79939.4	107404	72444.1	73306.5	107810	0.0101937	0.084686	0.0726812	0.0165174	-0.568102	0.55648	0.573551	-0.551031	UNCHANGED	UNCHANGED	UNCHANGED	UNCHANGED
A0A445DP66	3	974.478	Tr-type G domain-containing protein	eukaryotic translation initiation factor 2 subunit gamma isoform X1	P:cellular component organization;	23351.7	22765	23449.5	24827.7	26410.3	26621.3	28622.3	31107	17050	29022	31580.7	24563	23188.7	25953.1	25593.1	28388.6	0.0102679	0.590975	0.316082	0.608817	0.162484	0.149554	0.129402	0.142332	UNCHANGED	UNCHANGED	UNCHANGED	UNCHANGED
A0A444WW04	39	4612.66	Serine hydroxymethyltransferase	probable cytosolic oligopeptidase A	P:biosynthetic process; P:cellular process; P:protein metabolic process;	73097.7	82804.1	81572.3	64576.8	61255.3	54940.8	89628.3	132613	116762	82374	78780	74723.5	79158	60257.6	113001	78625.8	0.0104593	0.0542338	0.0068859	0.0587813	-0.393591	-0.523262	0.383859	0.513529	UNCHANGED	UNCHANGED	UNCHANGED	UNCHANGED
A0A445DA00	14	24150.9	Ribulose bisphosphate carboxylase small chain	ribulose bisphosphate carboxylase small chain 1, chloroplastic	P:photosynthesis;	1.25945e+06	1.17321e+06	1.46293e+06	922857	889160	764488	1.49301e+06	1.2719e+06	1.41606e+06	1.04611e+06	1.06176e+06	1.10249e+06	1.29853e+06	858835	1.39366e+06	1.07012e+06	0.0111151	0.00844522	0.0143569	0.426569	-0.596428	-0.381107	0.317315	0.101995	UNCHANGED	UNCHANGED	UNCHANGED	UNCHANGED
A0A444WQ52	4	2615.18	Uncharacterized protein	photosystem II 22 kDa protein, chloroplastic		384382	331435	356644	266088	268936	209972	421743	439381	535100	326292	345990	332205	357487	248332	465408	334829	0.0112681	0.0216172	0.0125379	0.0482665	-0.525619	-0.475071	0.431154	0.380606	UNCHANGED	UNCHANGED	UNCHANGED	UNCHANGED
A0A444X3D0	14	2753.84	Polyadenylate-binding protein	polyadenylate-binding protein 8		110375	113054	120115	138743	129228	130265	142949	130179	109024	162410	173188	140347	114515	132745	127384	158648	0.012106	0.08663	0.0627382	0.28002	0.213129	0.316645	0.25717	0.153654	UNCHANGED	UNCHANGED	UNCHANGED	UNCHANGED
A0A444YEU5	6	4565.33	Uncharacterized protein	ribose-phosphate pyrophosphokinase 4	P:nucleobase-containing compound metabolic process; P:biosynthetic process;	101753	111595	98799.4	83481.4	83927	71151.5	82150.1	78312.2	78823.1	63377.4	67183.5	63928.4	104049	79520	79761.8	64829.7	0.0126087	0.000906972	0.027889	0.00389253	-0.387875	-0.299042	-0.294661	-0.383495	UNCHANGED	UNCHANGED	UNCHANGED	UNCHANGED
A0A445B2V7	13	6109.03	UDP-glucose 6-dehydrogenase	UDP-glucose 6-dehydrogenase 1	P:nucleobase-containing compound metabolic process; P:biosynthetic process;	60697.6	61584.4	55283.7	77775.4	69542.1	81058.2	73656.7	84007.2	78445.3	87734.7	95583.3	67289.1	59188.6	76125.2	78703	83535.7	0.0127791	0.617804	0.461264	0.00550719	0.363056	0.0859734	0.134018	0.411101	UNCHANGED	UNCHANGED	UNCHANGED	UNCHANGED
A0A445DK46	34	11208.4	Uncharacterized protein	stromal 70 kDa heat shock-related protein, chloroplastic	P:response to stress; P:response to abiotic stimulus; P:cellular process; P:response to chemical;	460583	467646	537926	385002	372423	329249	538725	589658	565686	393160	402759	386363	488718	362225	564690	394094	0.0133772	0.000383574	0.143383	0.0573711	-0.432119	-0.518918	0.121655	0.208455	UNCHANGED	UNCHANGED	UNCHANGED	UNCHANGED
A0A445A9D0	5	4483.22	EF1_GNE domain-containing protein	elongation factor 1-beta		251626	250493	221128	190678	180485	148601	281973	221920	259247	203011	173644	204308	241082	173254	254380	193654	0.0136472	0.0395053	0.275173	0.545402	-0.476634	-0.393501	0.160592	0.0774584	UNCHANGED	UNCHANGED	UNCHANGED	UNCHANGED
A0A445ENL7	8	6058.86	Peroxidase	peroxidase 16	P:response to stress; P:catabolic process; P:cellular process; P:response to chemical;	349535	363440	380979	299222	280482	229514	274731	319264	300190	293416	332715	289846	364651	269739	298061	305326	0.0139624	0.719457	0.226891	0.0134924	-0.434953	0.0347393	0.178785	-0.290907	UNCHANGED	UNCHANGED	UNCHANGED	UNCHANGED
A0A444ZV53	16	4125.55	Aldedh domain-containing protein	aldehyde dehydrogenase family 2 member B7, mitochondrial	P:metabolic process	316244	300117	308041	252565	255119	205123	266294	270088	278614	230230	238290	236577	308134	237603	271665	235032	0.0140202	0.00112839	0.883336	0.00350598	-0.375006	-0.208972	-0.0156918	-0.181726	UNCHANGED	UNCHANGED	UNCHANGED	UNCHANGED
A0A445BE90	13	2879.14	Uncharacterized protein	glycerate dehydrogenase	P:metabolic process;	129517	134791	152331	103485	99731.7	74626.7	209746	112232	195586	87598	93064.7	128819	138880	92614.6	172521	103161	0.0153018	0.10383	0.540626	0.341493	-0.584523	-0.741884	0.155581	0.312941	UNCHANGED	UNCHANGED	UNCHANGED	UNCHANGED
A0A445CHG7	31	9335.19	Uncharacterized protein	ruBisCO large subunit-binding protein subunit beta, chloroplastic	P:transport; P:cellular component organization;	347985	343197	286663	256681	241558	225000	384118	341088	322728	310272	291882	290920	325948	241080	349311	297691	0.0174131	0.0551484	0.00699507	0.43268	-0.435133	-0.230697	0.304307	0.0998707	UNCHANGED	UNCHANGED	UNCHANGED	UNCHANGED
A0A445CD15	15	8477.98	Glyceraldehyde-3-phosphate dehydrogenase	glyceraldehyde-3-phosphate dehydrogenase B, chloroplastic	P:carbohydrate metabolic process;	441188	451718	406281	375011	368899	330258	407981	349598	437625	426087	386741	438397	433062	358056	398402	417075	0.018723	0.569692	0.0479767	0.302024	-0.274389	0.0660828	0.220122	-0.120351	UNCHANGED	UNCHANGED	UNCHANGED	UNCHANGED
A0A445C9C1	8	815.22	Glucose-6-phosphate isomerase	glucose-6-phosphate isomerase 1, chloroplastic	P:carbohydrate metabolic process; P:generation of precursor metabolites and energy; P:nucleobase-containing compound metabolic process; P:catabolic process; P:biosynthetic process;	85766	75046	92870.7	58413.7	67686	56616.3	85289.3	60133.7	74486.7	69215	72091	64469.7	84560.9	60905.3	73303.2	68591.9	0.0189835	0.569719	0.133146	0.276415	-0.473422	-0.0958386	0.171469	-0.206114	UNCHANGED	UNCHANGED	UNCHANGED	UNCHANGED
A0A444ZBY6	13	1989.62	Uncharacterized protein	DEAD-box ATP-dependent RNA helicase 37		79320.3	88943.7	73271.3	65868.4	56398	55394.4	69178	66044.3	72287.3	69658.3	69942.3	71766	80511.8	59220.3	69169.9	70455.6	0.0196657	0.539644	0.0298446	0.0818774	-0.443109	0.0265693	0.250622	-0.219056	UNCHANGED	UNCHANGED	UNCHANGED	UNCHANGED
A0A445DTP7	7	3283.81	Glutathione peroxidase	probable phospholipid hydroperoxide glutathione peroxidase	P:response to stress; P:metabolic process; P:cellular process; P:response to chemical;	294919	273303	329755	237485	178307	215076	278614	234978	253187	165555	171801	238185	299326	210289	255593	191847	0.0201924	0.0736278	0.558622	0.102761	-0.509342	-0.413893	-0.13242	-0.227869	UNCHANGED	UNCHANGED	UNCHANGED	UNCHANGED
A0A444WZ23	15	19794.5	Chlorophyll a-b binding protein, chloroplastic	chlorophyll a-b binding protein CP24 10A, chloroplastic	P:generation of precursor metabolites and energy; P:cellular protein modification process; P:response to light stimulus; P:photosynthesis;	266895	265227	312275	232869	209712	200071	399773	380446	436703	261134	291275	306209	281466	214217	405641	286206	0.0210311	0.00485786	0.0118993	0.00533077	-0.393884	-0.50315	0.417976	0.527243	UNCHANGED	UNCHANGED	UNCHANGED	UNCHANGED
A0A444ZM98	17	15748.2	Pyruvate dehydrogenase E1 component subunit beta	pyruvate dehydrogenase E1 component subunit beta, mitochondrial	P:nucleobase-containing compound metabolic process; P:biosynthetic process	288990	304944	297093	315506	330828	317464	286306	251636	244311	288202	291829	271290	297009	321266	260751	283774	0.0219492	0.185472	0.00920719	0.0577153	0.113262	0.12207	-0.179028	-0.187836	UNCHANGED	UNCHANGED	UNCHANGED	UNCHANGED
A0A445CE24	7	11980.9	RRM domain-containing protein	glycine-rich RNA-binding, abscisic acid-inducible protein		380168	358185	303066	258787	271208	230742	392041	343406	312317	280242	274635	265234	347140	253579	349254	273370	0.0224188	0.0324578	0.195382	0.951417	-0.453081	-0.353423	0.108421	0.00876284	UNCHANGED	UNCHANGED	UNCHANGED	UNCHANGED
A0A444XDI9	41	19615.5	Tr-type G domain-containing protein	elongation factor 2 isoform X2		499638	524171	477703	435193	460058	445321	506421	500616	502742	474656	490512	492224	500504	446857	503259	485797	0.0244445	0.040413	0.0130087	0.848553	-0.163568	-0.0509476	0.120541	0.00792022	UNCHANGED	UNCHANGED	UNCHANGED	UNCHANGED
A0A445A8H5	3	11410	Uncharacterized protein	glycine-rich protein 2		452546	380355	384875	332420	311279	279679	397805	410355	362283	364215	315926	372269	405925	307792	390148	350803	0.0245843	0.158536	0.139034	0.595943	-0.399257	-0.153358	0.188706	-0.0571937	UNCHANGED	UNCHANGED	UNCHANGED	UNCHANGED
A0A445DPP7	2	1419.64	Uncharacterized protein	signal recognition particle receptor subunit beta		78006	77105.5	63668.5	57801	41665	50417.5	81028.5	87533	68333	57818.5	60556	56923.5	72926.7	49961.2	78964.8	58432.7	0.0250717	0.0232641	0.151686	0.454607	-0.545639	-0.434435	0.225968	0.114764	UNCHANGED	UNCHANGED	UNCHANGED	UNCHANGED
A0A445DTR2	7	984.812	Glutamate--cysteine ligase	glutamate--cysteine ligase, chloroplastic isoform X1	P:biosynthetic process; P:cellular process;	70813.7	63076	66483.7	53004.3	47832.7	59131.3	47803.7	55521.7	46693.3	56018.7	58963	58829.7	66791.1	53322.8	50006.2	57937.1	0.0272362	0.0541052	0.246691	0.00926626	-0.324904	0.21238	0.119736	-0.417548	UNCHANGED	UNCHANGED	UNCHANGED	UNCHANGED
A0A444YX87	3	473.68	Pyruvate kinase	plastidial pyruvate kinase 2	P:carbohydrate metabolic process; P:generation of precursor metabolites and energy; P:nucleobase-containing compound metabolic process; P:catabolic process;	26109	28162	23432	21328	18986	15593	24305.7	23686.5	19463.7	14371	20727	9941.5	25901	18635.7	22485.3	15013.2	0.0280335	0.0983052	0.364643	0.170492	-0.474941	-0.582752	-0.311838	-0.204027	UNCHANGED	UNCHANGED	UNCHANGED	UNCHANGED
A0A444XII0	5	1353.17	Protein kinase domain-containing protein	pto-interacting protein 1-like	P:cellular protein modification process; P:signal transduction;	117332	122387	153254	87609	99533	86041	122025	101890	115782	103633	104120	106469	130991	91061	113232	104741	0.0292341	0.230835	0.0346681	0.234767	-0.52456	-0.112466	0.201916	-0.210177	UNCHANGED	UNCHANGED	UNCHANGED	UNCHANGED
A0A444ZYG1	6	2720.32	Uncharacterized protein	gamma carbonic anhydrase-like 2, mitochondrial	P:metabolic process	111097	93279.7	103019	84736.7	79677.7	87381.7	107897	109921	97179	103724	104793	96419	102465	83932	104999	101645	0.0300783	0.519013	0.00695011	0.716277	-0.287845	-0.0468347	0.27625	0.0352397	UNCHANGED	UNCHANGED	UNCHANGED	UNCHANGED
A0A445DBZ0	19	7487.13	Uncharacterized protein	hypersensitive-induced response protein-like protein 2	P:cellular protein modification process	301447	254806	233730	201041	191304	152384	223042	183445	203655	253005	283467	270662	263328	181577	203381	269045	0.0305025	0.0104514	0.00718592	0.0599486	-0.536281	0.403663	0.567267	-0.372676	UNCHANGED	UNCHANGED	UNCHANGED	UNCHANGED
A0A445AHD7	6	1168.85	Uncharacterized protein	3-ketoacyl-CoA thiolase 2, peroxisomal		88077.7	105999	91406.3	71770.3	79878.3	64736.7	73834	67230.7	89732	66029.7	65119.7	79726.3	95161	72128.4	76932.2	70291.9	0.030612	0.462467	0.789628	0.10289	-0.399802	-0.13023	-0.0372101	-0.306782	UNCHANGED	UNCHANGED	UNCHANGED	UNCHANGED
A0A445CRH1	15	31671.6	Thioredoxin domain-containing protein	2-Cys peroxiredoxin BAS1, chloroplastic	P:response to stress; P:catabolic process; P:cellular homeostasis; P:response to chemical	579747	519487	606851	461936	453477	344787	624580	690873	634573	507493	525290	489753	568695	420067	650009	507512	0.0313277	0.0034755	0.088911	0.0696736	-0.437036	-0.357018	0.272823	0.192804	UNCHANGED	UNCHANGED	UNCHANGED	UNCHANGED
A0A445DDE6	4	1467.92	Uncharacterized protein	DEAD-box ATP-dependent RNA helicase 8	P:cellular component organization;	25918	30026	30818.3	22298	19457	24629.3	25862.3	26259	31163	24028	23837	20742.5	28920.8	22128.1	27761.4	22869.2	0.0333159	0.0716586	0.707112	0.638312	-0.386226	-0.279679	0.0475235	-0.0590237	UNCHANGED	UNCHANGED	UNCHANGED	UNCHANGED
A0A445CH21	13	25104.6	Proteasome endopeptidase complex	proteasome subunit alpha type-2-A	P:catabolic process; P:cellular process; P:protein metabolic process;	311096	280602	322729	255203	217799	263072	300071	256170	235132	258569	233083	250808	304809	245358	263791	247487	0.034017	0.472211	0.899803	0.147545	-0.313016	-0.0920448	0.0124608	-0.20851	UNCHANGED	UNCHANGED	UNCHANGED	UNCHANGED
A0A445CYF4	5	1158.18	Glutathione reductase	glutathione reductase, cytosolic	P:generation of precursor metabolites and energy; P:cellular homeostasis; P:response to chemical;	89783.7	99342.7	103087	87137.3	83104.7	79439.7	69320	56748.3	75360.3	66564.3	65428	83678.3	97404.3	83227.2	67142.9	71890.2	0.0354771	0.587341	0.146702	0.0110362	-0.22693	0.098561	-0.21126	-0.536751	UNCHANGED	UNCHANGED	UNCHANGED	UNCHANGED
A0A445E2J6	8	1636.21	Uncharacterized protein	gamma aminobutyrate transaminase 1, mitochondrial	P:biosynthetic process; P:cellular process	93067.7	79823.3	86589	127344	129932	99618	86235	93664	83690	95419.7	105281	81776.3	86493.3	118965	87863	94159	0.0357423	0.445211	0.104568	0.791857	0.459872	0.0998432	-0.337362	0.0226668	UNCHANGED	UNCHANGED	UNCHANGED	UNCHANGED
A0A444Y8D3	9	8305.52	Uncharacterized protein	triosephosphate isomerase, cytosolic	P:carbohydrate metabolic process; P:generation of precursor metabolites and energy; P:nucleobase-containing compound metabolic process; P:catabolic process; P:biosynthetic process;	421842	383032	403483	355303	340324	376346	424642	384088	360973	489034	494335	479675	402786	357324	389901	487682	0.0412714	0.00688308	0.000321617	0.585006	-0.172779	0.322832	0.448706	-0.046905	UNCHANGED	UNCHANGED	UNCHANGED	UNCHANGED
A0A444Z0T8	19	6230.07	WD_REPEATS_REGION domain-containing protein	guanine nucleotide-binding protein subunit beta-like protein	P:translation; P:cellular protein modification process;	315737	285132	341432	269726	242179	267174	397234	339371	341706	271308	295642	250488	314100	259693	359437	272479	0.0423118	0.0193543	0.461942	0.14334	-0.274418	-0.399593	0.0693391	0.194514	UNCHANGED	UNCHANGED	UNCHANGED	UNCHANGED
A0A444ZW85	9	4445.32	Cysteine synthase	cysteine synthase, chloroplastic/chromoplastic	P:biosynthetic process; P:pollination; P:cellular component organization; P:cell growth; P:cell differentiation; P:anatomical structure development;	134746	125580	131156	120548	124184	116494	197834	121073	186711	98763.8	115819	102988	130494	120409	168539	105857	0.0438526	0.0626874	0.0597992	0.189527	-0.116044	-0.67097	-0.185826	0.369099	UNCHANGED	UNCHANGED	UNCHANGED	UNCHANGED
A0A444YNV1	12	4235.85	Uncharacterized protein	triosephosphate isomerase, chloroplastic	P:carbohydrate metabolic process; P:generation of precursor metabolites and energy; P:nucleobase-containing compound metabolic process; P:catabolic process; P:biosynthetic process;	35527.6	31287.5	34403.4	46953.5	47978.5	37449.7	29255.4	33205.4	24830.4	31133.1	28576.3	31089	33739.5	44127.2	29097.1	30266.1	0.0441811	0.671875	0.0159979	0.164403	0.387231	0.0568313	-0.543965	-0.213565	UNCHANGED	UNCHANGED	UNCHANGED	UNCHANGED
A0A445D891	11	5119.28	Thiamine thiazole synthase, chloroplastic	thiamine thiazole synthase 2, chloroplastic	P:biosynthetic process; P:cellular process;	105469	99561.5	121151	92860.3	88498.2	78593.3	132640	86154.6	100626	95679.3	106076	110946	108727	86650.6	106473	104234	0.045626	0.884355	0.0464372	0.889088	-0.32743	-0.0306717	0.266541	-0.0302178	UNCHANGED	UNCHANGED	UNCHANGED	UNCHANGED
A0A444XD25	9	3756.25	Uncharacterized protein	probable mediator of RNA polymerase II transcription subunit 37c	P:response to stress; P:response to abiotic stimulus; P:cellular process; P:response to chemical;	31354	26995.3	26121	24699.6	17317.4	17568	22087.5	26962	14640.8	32391.5	26758.6	26849.7	28156.7	19861.7	21230.1	28666.6	0.046433	0.139324	0.044868	0.152864	-0.503494	0.433257	0.529383	-0.407368	UNCHANGED	UNCHANGED	UNCHANGED	UNCHANGED
A0A445CMJ0	21	2084.15	Sucrose synthase	sucrose synthase 2	P:carbohydrate metabolic process; P:cellular process	91248.3	93294.6	120695	66801.3	72292	79346	75394.5	110151	85994.5	67962.4	66731.3	56511.8	101746	72813.1	90513.3	63735.2	0.0465491	0.0700419	0.151725	0.467206	-0.4827	-0.506041	-0.192109	-0.168768	UNCHANGED	UNCHANGED	UNCHANGED	UNCHANGED
A0A444ZMP3	3	1623.59	Mitogen-activated protein kinase	mitogen-activated protein kinase homolog MMK2	P:cellular protein modification process; P:signal transduction;	32012	38481	34444.5	30341.3	29403.8	28573.6	40028	27074	27886.5	25559	38145	23149.7	34979.2	29439.6	31662.8	28951.2	0.0471296	0.687143	0.92187	0.510339	-0.24874	-0.129166	-0.0241319	-0.143706	UNCHANGED	UNCHANGED	UNCHANGED	UNCHANGED
A0A445DY22	17	11768.1	Uncharacterized protein	probable lactoylglutathione lyase, chloroplastic		284613	261100	220917	208185	201986	171657	270625	228524	263585	176680	176177	187591	255543	193942	254245	180149	0.047254	0.00542857	0.31033	0.957119	-0.39794	-0.497025	-0.106437	-0.00735118	UNCHANGED	UNCHANGED	UNCHANGED	UNCHANGED
A0A444X9W2	11	3402.01	Uncharacterized protein	beta-glucosidase BoGH3B-like isoform X1	P:carbohydrate metabolic process	52278.2	49187.5	58914.7	45825.6	40090.9	31114.6	49606.6	47016.1	48292.5	32519.3	59071.6	52378.6	53460.1	39010.4	48305.1	47989.8	0.048624	0.970482	0.377238	0.157127	-0.454605	-0.00944678	0.29887	-0.146288	UNCHANGED	UNCHANGED	UNCHANGED	UNCHANGED
A0A444XDM4	9	6479.8	Uncharacterized protein	ras-related protein RABD2a	P:transport; P:signal transduction; P:response to chemical;	83915.9	76544	87668.3	68570.3	68020.3	47634.7	95630.2	74352.1	91127.2	73703	65277.7	67489.4	82709.4	61408.4	87036.5	68823.4	0.0491211	0.0587146	0.369299	0.582847	-0.429614	-0.338722	0.164461	0.0735692	UNCHANGED	UNCHANGED	UNCHANGED	UNCHANGED
A0A445AFA1	8	1397.81	Succinate--CoA ligase [ADP-forming] subunit beta, mitochondrial	succinate--CoA ligase [ADP-forming] subunit beta, mitochondrial	P:generation of precursor metabolites and energy; P:nucleobase-containing compound metabolic process;	203437	204319	206678	147792	185950	180735	164618	141621	140995	167804	183144	136788	204812	171492	149078	162579	0.0498067	0.438172	0.648671	0.00206106	-0.256154	0.125068	-0.0770061	-0.458228	UNCHANGED	UNCHANGED	UNCHANGED	UNCHANGED
A0A445EEI6	2	350.236	Uncharacterized protein	glycerol-3-phosphate dehydrogenase SDP6, mitochondrial isoform X2	P:metabolic process; P:cellular process;	577665	480154	371520	360082	165670	204444	468566	391583	329287	472692	444856	325050	476446	243399	396479	414199	0.0502856	0.784552	0.0841896	0.328292	-0.968991	0.063082	0.767003	-0.26507	UNCHANGED	UNCHANGED	UNCHANGED	UNCHANGED
A0A445AXK1	8	3893.05	Uncharacterized protein	putative lactoylglutathione lyase	P:catabolic process; P:cellular process	124713	97901.5	88637.3	72723.2	66735	30496.4	136226	133282	115120	93791.5	87281.9	94627.2	103751	56651.5	128209	91900.2	0.0508023	0.00656204	0.058085	0.125783	-0.872933	-0.48036	0.697953	0.305381	UNCHANGED	UNCHANGED	UNCHANGED	UNCHANGED
A0A444WW71	6	3144.55	Pectin acetylesterase	pectin acetylesterase 8	P:cellular component organization;	103352	107289	92178.3	89316.5	72451.5	84972.8	99774.6	125330	96689.3	111152	98091	97438.5	100940	82246.9	107265	102227	0.0511202	0.644647	0.0414816	0.566669	-0.295458	-0.069393	0.313746	0.0876809	UNCHANGED	UNCHANGED	UNCHANGED	UNCHANGED
A0A445CA13	14	6504.2	PEROXIDASE_4 domain-containing protein	probable L-ascorbate peroxidase 6, chloroplastic/mitochondrial isoform X1	P:response to stress; P:catabolic process; P:cellular process; P:response to chemical;	439146	464919	375871	354162	361300	341056	254619	240556	409951	288335	299469	435777	426645	352173	301709	341194	0.0515365	0.61286	0.829502	0.107321	-0.276753	0.177437	-0.0456911	-0.499881	UNCHANGED	UNCHANGED	UNCHANGED	UNCHANGED
A0A445BX16	8	11663.7	Rieske domain-containing protein	cytochrome b6-f complex iron-sulfur subunit, chloroplastic	P:generation of precursor metabolites and energy;	129272	175136	229853	93437.3	101576	99565.1	207165	102639	361113	134790	111448	213390	178087	98192.7	223639	153209	0.0519904	0.434444	0.149932	0.601729	-0.858895	-0.545668	0.641815	0.328588	UNCHANGED	UNCHANGED	UNCHANGED	UNCHANGED
A0A190CSF1	19	19279	Eukaryotic translation initiation factor 4A	eukaryotic initiation factor 4A-11		128144	138837	173215	187026	177577	192161	150791	150318	150836	157373	158806	151932	146732	185588	150648	156037	0.0526359	0.0622398	0.00341617	0.78765	0.33892	0.0507054	-0.250216	0.0379994	UNCHANGED	UNCHANGED	UNCHANGED	UNCHANGED
A0A445ED69	6	893.008	Carboxypeptidase	serine carboxypeptidase-like 45	P:catabolic process; P:cellular process; P:protein metabolic process;	39657	26645.7	38391.4	22509.3	24587	13043.9	42405.7	30841	30754.3	24287.1	35602.6	33167.3	34898	20046.7	34667	31019	0.0529035	0.519853	0.0906845	0.969445	-0.799777	-0.160411	0.629785	-0.0095819	UNCHANGED	UNCHANGED	UNCHANGED	UNCHANGED
A0A444YZJ8	12	1891.66	ATP-dependent 6-phosphofructokinase	ATP-dependent 6-phosphofructokinase 3	P:carbohydrate metabolic process; P:generation of precursor metabolites and energy; P:nucleobase-containing compound metabolic process; P:catabolic process;	50192.7	55280.9	43053.7	57609	60738.1	60166.7	54737.9	44772.6	59159.8	51019.8	52924.6	53470.6	49509.1	59504.6	52890.1	52471.6	0.0529692	0.927477	0.00443292	0.574562	0.265307	-0.0114598	-0.181463	0.095304	UNCHANGED	UNCHANGED	UNCHANGED	UNCHANGED
A0A445AMM7	15	1341.04	UBA_e1_C domain-containing protein	ubiquitin-activating enzyme E1 1	P:cellular protein modification process; P:response to stress; P:catabolic process;	99540.6	122346	121425	141892	140710	129516	104255	160755	172674	166428	202066	155966	114437	137373	145895	174820	0.0529828	0.316667	0.0611625	0.232556	0.263537	0.260945	0.347775	0.350367	UNCHANGED	UNCHANGED	UNCHANGED	UNCHANGED
A0A445AVN4	5	2425.94	Ribosomal_S17_N domain-containing protein	40S ribosomal protein S11	P:translation;	6517.59	26014.1	78889.1	81841.8	111729	112133	4679.43	10506.3	21808.8	35705.2	42692.5	93605.9	37140.2	101901	12331.5	57334.5	0.0531375	0.0761852	0.0990533	0.326304	1.45612	2.21705	-0.829699	-1.59063	UNCHANGED	UNCHANGED	UNCHANGED	UNCHANGED
A0A444XNX3	2	3091.62	Uncharacterized protein	ras-related protein RABA5a	P:transport; P:signal transduction	105399	100373	68754.1	64165.6	55371.1	59243	118828	99697.2	96698	89367.7	85479.4	69301.7	91508.8	59593.2	105074	81382.9	0.0531737	0.0627802	0.0305993	0.368659	-0.618762	-0.368614	0.449578	0.199431	UNCHANGED	UNCHANGED	UNCHANGED	UNCHANGED
A0A444Y1X8	14	4927.26	Isocitrate dehydrogenase [NADP]	isocitrate dehydrogenase [NADP]	P:generation of precursor metabolites and energy;	27262.6	25953.6	44425.4	16643	16353.5	16196.3	25181.1	24249.8	21569.3	19573.7	21399.1	20307.9	32547.2	16397.6	23666.8	20426.9	0.0533677	0.0548007	0.00179963	0.215981	-0.989052	-0.212389	0.31699	-0.459673	UNCHANGED	UNCHANGED	UNCHANGED	UNCHANGED
A0A445C5M8	11	10195.5	60S acidic ribosomal protein P0	60S acidic ribosomal protein P0	P:translation; P:cellular component organization	335889	323640	241958	403755	372814	376786	408738	317689	301711	334792	356170	396155	300496	384452	342713	362372	0.0538391	0.631114	0.34088	0.396494	0.355458	0.0804723	-0.085329	0.189657	UNCHANGED	UNCHANGED	UNCHANGED	UNCHANGED
A0A445BNG4	3	1091.99	Uncharacterized protein	probable linoleate 9S-lipoxygenase 5	P:lipid metabolic process; P:biosynthetic process; P:cellular process	66880.7	90496.8	126563	162199	187112	129417	76048.3	120433	89315.6	81611	133106	124476	94646.8	159576	95265.6	113064	0.0543485	0.437402	0.114103	0.97869	0.753619	0.247115	-0.497102	0.00940167	UNCHANGED	UNCHANGED	UNCHANGED	UNCHANGED
A0A445AM31	4	3879.89	Uncharacterized protein	ribose-phosphate pyrophosphokinase 4	P:nucleobase-containing compound metabolic process; P:biosynthetic process;	15025.3	13480.8	8833.29	20443.8	22100.5	15900.7	15198.2	22277.4	18766.9	25815.7	18713.3	26542.4	12446.5	19481.7	18747.5	23690.5	0.0552951	0.200342	0.247371	0.0848047	0.646385	0.337608	0.282188	0.590965	UNCHANGED	UNCHANGED	UNCHANGED	UNCHANGED
A0A445B3H6	15	3739.1	Glucose-6-phosphate isomerase	glucose-6-phosphate isomerase, cytosolic	P:carbohydrate metabolic process; P:generation of precursor metabolites and energy; P:nucleobase-containing compound metabolic process; P:response to stress; P:catabolic process; P:biosynthetic process; P:response to external stimulus; P:response to biotic stimulus; P:response to chemical;	157482	155557	158015	153264	138103	143775	126891	122579	121667	170863	183370	178045	157018	145047	123712	177426	0.0558702	0.000171966	0.00479355	4.75698e-05	-0.114404	0.520227	0.290694	-0.343937	UNCHANGED	UNCHANGED	UNCHANGED	UNCHANGED
A0A444WZ47	4	432.37	Uncharacterized protein	dynamin-related protein 3A		23166.7	33824.3	28320	37833	36191.5	36250	19548.7	34949.7	14356	30155.5	42432	15316	28437	36758.2	22951.4	29301.2	0.0561668	0.559374	0.39636	0.471529	0.370296	0.352373	-0.327107	-0.309184	UNCHANGED	UNCHANGED	UNCHANGED	UNCHANGED
A0A445DF26	7	766.842	Uncharacterized protein	aminoacylase-1 isoform X1	P:cellular process; P:protein metabolic process; P:response to chemical;	56852.3	59612	51776.7	61457.3	78742	72258	55631.3	37546.7	48095.3	50977.7	48346.3	59049	56080.3	70819.1	47091.1	52791	0.0563337	0.406776	0.0394016	0.191443	0.336644	0.164837	-0.423847	-0.25204	UNCHANGED	UNCHANGED	UNCHANGED	UNCHANGED
A0A445C7D2	5	24824.4	ATP-synt_ab domain-containing protein	ATP synthase beta subunit	P:nucleobase-containing compound metabolic process; P:transport; P:biosynthetic process;	18239.8	17144.9	25341.4	12324.7	14249.7	13185.8	16275.7	12258.4	15304.8	12532.3	15037.1	15395.2	20242	13253.4	14613	14321.5	0.0564804	0.856216	0.370096	0.118518	-0.610992	-0.0290637	0.111825	-0.470103	UNCHANGED	UNCHANGED	UNCHANGED	UNCHANGED
A0A445E6W3	2	3064.45	V-type proton ATPase subunit G	V-type proton ATPase subunit G	P:transport;	33568.5	84276.5	84147.5	121955	108526	109868	21111	20822	88204.5	71345.5	90806	132625	67330.8	113450	43379.2	98258.8	0.0570688	0.12936	0.459394	0.441421	0.752713	1.17958	-0.207393	-0.634265	UNCHANGED	UNCHANGED	UNCHANGED	UNCHANGED
A0A444WPU1	5	24617.4	ATP-synt_ab domain-containing protein	ATP synthase beta subunit	P:nucleobase-containing compound metabolic process; P:transport; P:biosynthetic process;	215524	222183	248121	206187	188591	161825	271888	128550	305427	187505	99169.6	261624	228609	185534	235289	182766	0.0572769	0.504691	0.957394	0.909431	-0.301197	-0.364433	-0.0216868	0.0415486	UNCHANGED	UNCHANGED	UNCHANGED	UNCHANGED
A0A445BAE6	28	57587.9	Uncharacterized protein	actin-7		424175	373697	378481	341109	359103	339906	403100	369874	343274	509120	499218	505637	392118	346706	372082	504658	0.0579781	0.00164438	2.09876e-05	0.444239	-0.177573	0.439684	0.541593	-0.0756639	UNCHANGED	UNCHANGED	UNCHANGED	UNCHANGED
A0A444X0X3	8	4287.99	PHB domain-containing protein	prohibitin-1, mitochondrial		83794.9	74385.3	77660.7	100621	108644	85022.9	81368.2	18864.6	38621.5	75280.6	88864.2	88822.3	78613.6	98095.8	46284.8	84322.3	0.0593867	0.115737	0.171479	0.158054	0.319412	0.865377	-0.218276	-0.764242	UNCHANGED	UNCHANGED	UNCHANGED	UNCHANGED
A0A444ZRU7	24	9998.74	Adenosylhomocysteinase	adenosylhomocysteinase	P:metabolic process; P:cellular process;	288246	311607	319906	357963	368431	323239	252639	390383	267391	409332	371093	370680	306587	349878	303471	383701	0.05979	0.15267	0.145231	0.947756	0.190556	0.338425	0.133133	-0.0147358	UNCHANGED	UNCHANGED	UNCHANGED	UNCHANGED
A0A445EUE2	9	2527.4	VWFA domain-containing protein	26S proteasome non-ATPase regulatory subunit 4 homolog isoform X1	P:catabolic process; P:cellular component organization; P:protein metabolic process;	130167	114986	113736	108747	104161	97383.3	140193	121413	86560.3	108060	107205	93467.7	119630	103430	116056	102911	0.0599713	0.467968	0.932594	0.839836	-0.209919	-0.173418	-0.00725905	-0.0437596	UNCHANGED	UNCHANGED	UNCHANGED	UNCHANGED
A0A142F3D2	11	1661.72	Glutamate dehydrogenase	glutamate dehydrogenase 1	P:metabolic process; P:cellular process	84662.7	94894.4	135029	64473.1	69369.5	58921.5	133332	108866	133566	93234.7	86373.5	94871.5	104862	64254.7	125255	91493.2	0.0605257	0.0171525	0.00239771	0.306682	-0.706619	-0.453127	0.509862	0.25637	UNCHANGED	UNCHANGED	UNCHANGED	UNCHANGED
A0A444ZQI3	20	3171.5	Protein kinase domain-containing protein	MDIS1-interacting receptor like kinase 2-like	P:cellular protein modification process;	131500	118101	125754	113048	106356	86108.2	105553	110832	112772	141636	132579	126779	125118	101837	109719	133665	0.060531	0.0077253	0.0256537	0.0256243	-0.297021	0.284808	0.392348	-0.189482	UNCHANGED	UNCHANGED	UNCHANGED	UNCHANGED
A0A445AGZ0	7	30679.6	Photosystem II protein D1	photosystem II protein D1	P:generation of precursor metabolites and energy; P:cellular protein modification process; P:response to stress; P:photosynthesis; P:response to chemical;	525051	599172	758639	435994	483978	353476	519122	804430	759276	517453	489285	509370	627621	424483	694276	505369	0.0613588	0.10088	0.106865	0.58443	-0.564187	-0.458172	0.251632	0.145617	UNCHANGED	UNCHANGED	UNCHANGED	UNCHANGED
A0A445CMY6	2	403.117	Uncharacterized protein	uncharacterized protein LOC112695666		72666	48860	45310	28792	39199.5	21601	38251.5	48685	47685	45899	60029	35050	55612	29864.2	44873.8	46992.7	0.0615457	0.803225	0.125155	0.308382	-0.896981	0.0665612	0.65402	-0.309522	UNCHANGED	UNCHANGED	UNCHANGED	UNCHANGED
A0A444Z848	4	1505.89	Uncharacterized protein	porphobilinogen deaminase, chloroplastic	P:cellular protein modification process; P:biosynthetic process;	552332	693100	918787	456121	480462	329877	564744	458460	561402	315150	284726	450713	721406	422153	528202	350196	0.0620452	0.0450096	0.356801	0.160427	-0.773046	-0.592926	-0.269602	-0.449723	UNCHANGED	UNCHANGED	UNCHANGED	UNCHANGED
A0A445BKN6	17	6457.5	AAA domain-containing protein	26S proteasome regulatory subunit 6A homolog	P:nucleobase-containing compound metabolic process; P:catabolic process; P:biosynthetic process; P:cellular component organization; P:protein metabolic process;	142882	124674	141844	124848	119224	117192	114268	100581	122738	104250	113666	119345	136467	120421	112529	112420	0.064402	0.98958	0.182141	0.0521001	-0.18046	-0.00139243	-0.0991853	-0.278253	UNCHANGED	UNCHANGED	UNCHANGED	UNCHANGED
A0A445BTW6	2	1619.46	GRAM domain-containing protein	GEM-like protein 1		83246.5	67868.5	64504	58140.5	54663	58403.5	94582	101920	93446	73248	75355.5	82849	71873	57069	96649.2	77150.8	0.0659275	0.00778141	0.00311564	0.0175237	-0.332743	-0.325076	0.434974	0.427307	UNCHANGED	UNCHANGED	UNCHANGED	UNCHANGED
A0A445DNG7	4	458.365	26S proteasome non-ATPase regulatory subunit 1 homolog	26S proteasome non-ATPase regulatory subunit 1 homolog A	P:catabolic process; P:cellular process; P:protein metabolic process;	76364	101157	89614	107544	105409	108245	67556.3	93967	96548.3	94759.3	104994	94035.7	89045	107066	86023.9	97929.7	0.066892	0.296144	0.0660478	0.809141	0.265891	0.187009	-0.12868	-0.0497973	UNCHANGED	UNCHANGED	UNCHANGED	UNCHANGED
A0A445DXV8	14	15672.5	Malic enzyme	NADP-dependent malic enzyme	P:metabolic process; P:cellular process;	394733	413727	423264	388637	378332	341650	444811	353531	481617	392591	447107	380452	410574	369540	426653	406716	0.0681605	0.66871	0.210735	0.701178	-0.151914	-0.0690391	0.138295	0.0554193	UNCHANGED	UNCHANGED	UNCHANGED	UNCHANGED
A0A444XXV6	10	1220.15	Uncharacterized protein	Phospholipase D alpha 1	P:lipid metabolic process; P:catabolic process; P:cellular process;	81818	82175.8	73904.9	64620.4	62760.8	33524.8	119233	128854	105723	85452.3	75627.5	83198.4	79299.6	53635.3	117937	81426.1	0.0695584	0.00761805	0.0571588	0.00591289	-0.564131	-0.534452	0.602308	0.572629	UNCHANGED	UNCHANGED	UNCHANGED	UNCHANGED
A0A444XX32	5	2184.01	PfkB domain-containing protein	probable fructokinase-7	P:carbohydrate metabolic process;	172952	147416	83076	186845	204351	231934	82926.3	176384	136294	187145	411121	228627	134481	207710	131868	275631	0.0698042	0.123721	0.387059	0.948537	0.627166	1.06365	0.408169	-0.0283118	UNCHANGED	UNCHANGED	UNCHANGED	UNCHANGED
A0A445D826	8	7318.16	Cysteine synthase	cysteine synthase	P:biosynthetic process; P:cellular process;	4707.96	4837.4	6117.04	4262.11	3913.33	4097.23	6042.21	3318.74	2912.79	4596.51	4430.94	1812	5220.8	4090.89	4091.25	3613.15	0.070296	0.738098	0.626409	0.354853	-0.351857	-0.179283	-0.179156	-0.351731	UNCHANGED	UNCHANGED	UNCHANGED	UNCHANGED
A0A445BPA0	8	3550.13	Uncharacterized protein	heat shock cognate 70 kDa protein-like		23344.9	33522.9	38204	38916.3	47506.3	53542.7	32564	32105.4	42579.2	30712.4	33031.5	70686.3	31690.6	46655.1	35749.5	44810.1	0.0702965	0.535978	0.898881	0.505855	0.557979	0.325898	-0.0582124	0.173869	UNCHANGED	UNCHANGED	UNCHANGED	UNCHANGED
A0A445E060	13	1228.12	26S proteasome non-ATPase regulatory subunit 2 homolog	26S proteasome non-ATPase regulatory subunit 2 homolog A	P:catabolic process; P:cellular process; P:protein metabolic process;	142002	208485	181651	217532	238154	225152	107580	148124	122761	165374	193149	178838	177379	226946	126155	179120	0.0704057	0.020712	0.00884321	0.0864746	0.355512	0.505732	-0.34142	-0.49164	UNCHANGED	UNCHANGED	UNCHANGED	UNCHANGED
A0A445CCR6	26	27248.1	Tubulin beta chain	tubulin beta chain	P:cell cycle; P:cellular component organization;	360215	304763	538456	255464	204698	214371	348309	355014	288406	296217	319717	299980	401145	224844	330577	305305	0.0710527	0.32218	0.00943186	0.392	-0.835197	-0.114735	0.441324	-0.279138	UNCHANGED	UNCHANGED	UNCHANGED	UNCHANGED
A0A444X9B6	5	6655.1	Uncharacterized protein	allene oxide cyclase, chloroplastic	P:biosynthetic process; P:cellular process	239250	202267	385389	137023	146341	133698	160988	134758	157074	119460	113494	113042	275635	139020	150940	115332	0.0713553	0.0134203	0.00535224	0.0919303	-0.987464	-0.388182	-0.269505	-0.868788	UNCHANGED	UNCHANGED	UNCHANGED	UNCHANGED
A0A444X7K4	6	2291.49	ATP synthase subunit gamma	ATP synthase subunit gamma, mitochondrial	P:nucleobase-containing compound metabolic process; P:transport; P:biosynthetic process;	83339.3	78143.3	68454.7	68468.3	64051.3	56169	69065	59426.7	59476.3	71090.7	67143.3	73195	76645.8	62896.2	62656	70476.3	0.0718256	0.0996308	0.131757	0.0610153	-0.285233	0.169686	0.164166	-0.290754	UNCHANGED	UNCHANGED	UNCHANGED	UNCHANGED
A0A445ARD2	15	3771.42	Uncharacterized protein	fumarate hydratase 1, mitochondrial	P:generation of precursor metabolites and energy;	187792	231931	144029	239868	249375	268041	132049	115692	150322	139790	184253	212788	187917	252428	132687	178944	0.0729982	0.120123	0.0321627	0.112866	0.425777	0.431474	-0.496369	-0.502066	UNCHANGED	UNCHANGED	UNCHANGED	UNCHANGED
A0A445BN79	5	5926.9	40S ribosomal protein S8	40S ribosomal protein S8	P:translation;	45178	73751	58218	101088	260723	158380	31920	43071	52847.7	67761	68485	195227	59049	173397	42612.9	110491	0.0734245	0.187919	0.37487	0.183578	1.5541	1.37457	-0.650151	-0.470623	UNCHANGED	UNCHANGED	UNCHANGED	UNCHANGED
A0A444YG83	23	3849.04	Uncharacterized protein	prolyl endopeptidase	P:carbohydrate metabolic process; P:cellular process; P:protein metabolic process;	31456.3	37167.7	39040.2	30318	13731.4	25005.9	39449.7	60160.7	53745.7	25114	32099	44896.3	35888.1	23018.4	51118.7	34036.4	0.0755721	0.112598	0.21976	0.080118	-0.640714	-0.58677	0.56429	0.510346	UNCHANGED	UNCHANGED	UNCHANGED	UNCHANGED
A0A445DRS8	4	808.914	Uncharacterized protein	methylmalonate-semialdehyde dehydrogenase [acylating], mitochondrial	P:nucleobase-containing compound metabolic process; P:catabolic process;	109517	88014	69026	123101	115790	113715	93195.3	130377	75634.3	130076	136582	123285	88852.4	117535	99735.6	129981	0.0757631	0.142323	0.0597822	0.614058	0.403611	0.382122	0.145207	0.166696	UNCHANGED	UNCHANGED	UNCHANGED	UNCHANGED
A0A444Y4H6	3	310.584	Glutamine amidotransferase type-1 domain-containing protein	probable phosphoribosylformylglycinamidine synthase, chloroplastic/mitochondrial	P:nucleobase-containing compound metabolic process; P:biosynthetic process;	21639.7	27263.7	30857.7	33659	31671.3	34542.7	26112.3	35256	40025.7	41722.3	54019.7	47340	26587	33291	33798	47694	0.0757653	0.0621541	0.0169408	0.213909	0.324411	0.49687	0.518676	0.346217	UNCHANGED	UNCHANGED	UNCHANGED	UNCHANGED
A0A445DJL9	9	1854.41	Uncharacterized protein	ATP synthase gamma chain, chloroplastic	P:nucleobase-containing compound metabolic process; P:transport; P:biosynthetic process;	233463	207025	172419	178767	139498	131511	177210	163305	218479	135021	134125	130408	204302	149925	186331	133185	0.0766769	0.0330164	0.317537	0.499386	-0.446461	-0.484444	-0.170818	-0.132835	UNCHANGED	UNCHANGED	UNCHANGED	UNCHANGED
A0A445BAQ8	44	5330.39	Uncharacterized protein	DNA polymerase V	P:DNA metabolic process; P:transport; P:biosynthetic process;	137653	133604	130609	180347	303543	194267	123614	123348	106179	186767	172865	136653	133955	226053	117713	165428	0.0775714	0.0407397	0.219839	0.0567077	0.754909	0.49093	-0.450451	-0.186472	UNCHANGED	UNCHANGED	UNCHANGED	UNCHANGED
A0A445EWB1	5	1045.17	Uncharacterized protein	DNA damage-inducible protein 1	P:protein metabolic process; P:response to chemical;	81697	80378.3	71762.5	72660.3	64913.3	69260.7	95436	88937	77064.7	74830.3	73838	70881.7	77945.9	68944.8	87145.9	73183.3	0.0789196	0.0643129	0.170009	0.212928	-0.177033	-0.251917	0.0860738	0.160959	UNCHANGED	UNCHANGED	UNCHANGED	UNCHANGED
A0A444Y1E4	5	1476.57	Uncharacterized protein	DUF642 family protein	P:DNA metabolic process;	98081.6	92474.7	73466.1	77221.6	61801.8	61112	95577.4	96740.8	87222.4	57500.3	81046.6	90502.3	88007.5	66711.8	93180.2	76349.7	0.0797627	0.176258	0.435461	0.554509	-0.399684	-0.2874	0.194681	0.0823973	UNCHANGED	UNCHANGED	UNCHANGED	UNCHANGED
A0A444WQ31	7	14004.5	Uncharacterized protein	photosystem II CP43 chlorophyll apoprotein	P:generation of precursor metabolites and energy; P:cellular protein modification process; P:photosynthesis;	323848	391219	415756	320872	315739	265775	323143	437088	427700	389354	401584	377958	376941	300796	395977	389632	0.0798385	0.872668	0.00922114	0.698387	-0.325555	-0.0233057	0.373328	0.0710785	UNCHANGED	UNCHANGED	UNCHANGED	UNCHANGED
A0A445EBZ3	10	3661.11	Ribos_L4_asso_C domain-containing protein	60S ribosomal protein L4	P:translation;	5621.2	49280.7	277077	247518	361689	379161	4660.33	15521.7	82890.7	91412.4	87673.1	305446	110660	329456	34357.6	161510	0.0798858	0.169722	0.112967	0.4331	1.57396	2.23293	-1.02846	-1.68743	UNCHANGED	UNCHANGED	UNCHANGED	UNCHANGED
A0A444Y324	9	1358.23	Uncharacterized protein	trifunctional UDP-glucose 4,6-dehydratase/UDP-4-keto-6-deoxy-D-glucose 3,5-epimerase/UDP-4-keto-L-rhamnose-reductase RHM1	P:nucleobase-containing compound metabolic process	45111.3	44407.3	49313.7	72456.3	51254.3	85240.7	28655	39948.3	40403.7	48601.4	44359.1	62334.2	46277.4	69650.4	36335.7	51764.9	0.0801936	0.0810506	0.188583	0.0740848	0.589823	0.510588	-0.428158	-0.348923	UNCHANGED	UNCHANGED	UNCHANGED	UNCHANGED
A0A444Z9I7	16	8538.37	NmrA domain-containing protein	isoflavone reductase	P:response to stress; P:metabolic process	360505	368103	444484	328013	339720	283466	373254	291339	381721	283992	278323	337877	391031	317066	348771	300064	0.0807688	0.230933	0.542465	0.343494	-0.302498	-0.21701	-0.0795141	-0.165001	UNCHANGED	UNCHANGED	UNCHANGED	UNCHANGED
A0A445C1N1	9	2607.86	Peptidase A1 domain-containing protein	aspartyl protease family protein 2	P:catabolic process; P:protein metabolic process	235059	202728	204040	200702	165970	158713	190835	192523	161409	193972	187524	171404	213942	175128	181589	184300	0.0809965	0.834071	0.563771	0.0912853	-0.288809	0.0213797	0.0736421	-0.236546	UNCHANGED	UNCHANGED	UNCHANGED	UNCHANGED
A0A445EQB3	2	1672.21	S10_plectin domain-containing protein	40S ribosomal protein S10-1		24771.3	39388.7	17374	44624	40908.5	65280	12681	20846.5	35515.3	27862.7	49024.3	69544	27178	50270.8	23014.3	48810.3	0.0813722	0.134157	0.923148	0.677487	0.887282	1.08466	-0.042535	-0.23991	UNCHANGED	UNCHANGED	UNCHANGED	UNCHANGED
A0A445C1V2	25	1912.68	UVR domain-containing protein	chaperone protein ClpC, chloroplastic	P:protein metabolic process	57125	142309	121581	175843	199751	146762	63920.7	142544	161167	204299	197315	187532	107005	174119	122544	196382	0.0879902	0.0707943	0.238272	0.712857	0.702392	0.680366	0.173593	0.195619	UNCHANGED	UNCHANGED	UNCHANGED	UNCHANGED
A0A444ZI83	16	1353.21	Plasma membrane ATPase	plasma membrane ATPase 4	P:transport; P:cellular homeostasis;	24508	23446.7	38522.5	17789.1	19503.6	15681.6	10512.5	25117.4	30541.1	18846.1	16771	21463.1	28825.7	17658.1	22057	19026.7	0.0884725	0.647142	0.477998	0.429296	-0.707028	-0.213208	0.107699	-0.386121	UNCHANGED	UNCHANGED	UNCHANGED	UNCHANGED
A0A445CZP0	27	3780.29	HATPase_c domain-containing protein	heat shock protein 90-5, chloroplastic	P:transport; P:response to stress; P:response to abiotic stimulus; P:cellular process; P:response to chemical;	88929.7	130675	113864	85584	87830.3	63220.5	89976	135476	147072	105755	113110	99063.2	111156	78878.3	124175	105976	0.0892186	0.366557	0.0374774	0.572867	-0.49489	-0.228632	0.42604	0.159782	UNCHANGED	UNCHANGED	UNCHANGED	UNCHANGED
A0A444XC38	3	1213.18	Aminotran_1_2 domain-containing protein	aromatic aminotransferase ISS1-like isoform X1	P:biosynthetic process; P:cellular process	27869.5	59289.7	28458	86361.3	77928.7	50464	28530.7	32477	31416	60702.7	71032.3	36504.5	38539.1	71584.7	30807.9	56079.8	0.0924008	0.0701655	0.356947	0.500223	0.893329	0.864182	-0.352169	-0.323021	UNCHANGED	UNCHANGED	UNCHANGED	UNCHANGED
A0A445C3A3	9	1771.54	Phosphatidate cytidylyltransferase	Phosphatidate cytidylyltransferase 3	P:nucleobase-containing compound metabolic process; P:lipid metabolic process; P:transport; P:biosynthetic process;	109946	97171	130212	94492.1	84668.2	91786	97689.8	97640.1	79560.1	92643.6	100091	85693	112443	90315.4	91630	92809.2	0.0926029	0.879961	0.649567	0.140771	-0.316149	0.018448	0.0392957	-0.295302	UNCHANGED	UNCHANGED	UNCHANGED	UNCHANGED
A0A444ZY15	7	1605.76	Uncharacterized protein	phosphoribosylformylglycinamidine cyclo-ligase, chloroplastic/mitochondrial	P:nucleobase-containing compound metabolic process; P:biosynthetic process;	79600.7	84698.7	104884	66368.7	68449.3	78122	91391.3	67211.7	83812.3	71456.7	95637.3	105165	89727.9	70980	80805.1	90753.1	0.0927896	0.464474	0.13738	0.443938	-0.338144	0.167501	0.354535	-0.15111	UNCHANGED	UNCHANGED	UNCHANGED	UNCHANGED
A0A445D9X7	10	3603.92	14_3_3 domain-containing protein	14-3-3-like protein A		56557	81886.8	74548.2	61732.5	43549.3	45446.5	51110.4	29606.7	70268.2	67440.9	54582	82901.1	70997.4	50242.8	50328.5	68308	0.0938313	0.277508	0.145625	0.212513	-0.498849	0.44068	0.443138	-0.496391	UNCHANGED	UNCHANGED	UNCHANGED	UNCHANGED
A0A445DTK9	5	2618.25	Ribosomal_S17_N domain-containing protein	40S ribosomal protein S11	P:translation;	7610.91	28788.6	100526	99137.8	108059	117063	3170.35	7465.03	20507.2	30571.8	38672.5	92348.8	45641.9	108087	10380.9	53864.4	0.0942836	0.0962047	0.0539459	0.28503	1.24376	2.37541	-1.00478	-2.13643	UNCHANGED	UNCHANGED	UNCHANGED	UNCHANGED
A0A445E214	3	566.81	WD_REPEATS_REGION domain-containing protein	protein transport protein SEC31 homolog B	P:transport; P:cellular component organization;	87382	82646.7	126331	30555	29152.5	85389	27574	80971	63769.7	101233	112268	80051.7	98786.6	48365.5	57438.2	97850.8	0.0946246	0.0924986	0.0759634	0.119748	-1.03034	0.768572	1.01661	-0.782304	UNCHANGED	UNCHANGED	UNCHANGED	UNCHANGED
A0A444ZBS6	19	12975.1	Adenosylhomocysteinase	adenosylhomocysteinase	P:metabolic process; P:cellular process;	489425	560169	576231	612524	650800	579159	393548	533556	427722	566931	580347	540467	541942	614161	451609	562582	0.0991396	0.0641888	0.0959432	0.144326	0.18048	0.316989	-0.126555	-0.263065	UNCHANGED	UNCHANGED	UNCHANGED	UNCHANGED
A0A444YMI9	28	34361	Uncharacterized protein	probable mediator of RNA polymerase II transcription subunit 37c	P:response to stress; P:response to abiotic stimulus; P:cellular process; P:response to chemical;	189206	204299	274777	156663	180367	154616	168835	185770	182774	184184	183224	163161	222761	163882	179126	176856	0.100142	0.805182	0.293404	0.179868	-0.442835	-0.0183972	0.10992	-0.314518	UNCHANGED	UNCHANGED	UNCHANGED	UNCHANGED
A0A445DI38	11	1984.25	AAA domain-containing protein	ATP-dependent zinc metalloprotease FTSH 2, chloroplastic	P:generation of precursor metabolites and energy; P:catabolic process; P:response to light stimulus; P:photosynthesis; P:cellular component organization; P:protein metabolic process;	103108	114691	103444	127211	117451	112872	124393	150028	151215	142512	113394	127751	107081	119178	141879	127885	0.100626	0.313009	0.407134	0.0218296	0.154416	-0.149806	0.101736	0.405958	UNCHANGED	UNCHANGED	UNCHANGED	UNCHANGED
A0A444ZT52	10	5802.7	Uncharacterized protein	40S ribosomal protein S14	P:nucleobase-containing compound metabolic process; P:translation; P:cellular component organization;	40644.7	111838	112250	149223	137573	132296	19393.3	71339.3	144307	126917	127031	151803	88244	139698	78346.4	135250	0.101831	0.20047	0.669456	0.830586	0.662738	0.787692	-0.0466758	-0.17163	UNCHANGED	UNCHANGED	UNCHANGED	UNCHANGED
A0A444X9V2	21	7009.41	Uncharacterized protein	5-methyltetrahydropteroyltriglutamate--homocysteine methyltransferase	P:biosynthetic process; P:cellular process;	197973	201180	278986	282271	272147	348041	195358	169491	215878	245112	285745	241262	226046	300820	193576	257373	0.103623	0.0310316	0.192122	0.335572	0.412281	0.410964	-0.225039	-0.223722	UNCHANGED	UNCHANGED	UNCHANGED	UNCHANGED
A0A445DK56	4	2812.38	Uncharacterized protein	ras-related protein RABA2a	P:transport; P:signal transduction	16759.9	12232.3	8033.17	18155.8	16181.3	19762.7	12837.5	6794.17	12472.5	11284	11652.8	15754.7	12341.8	18033.3	10701.4	12897.2	0.104933	0.416417	0.0438858	0.634215	0.547109	0.269254	-0.483606	-0.205751	UNCHANGED	UNCHANGED	UNCHANGED	UNCHANGED
A0A445BPM4	19	7122.06	Iso_dh domain-containing protein	putative disease resistance protein At3g14460	P:metabolic process	84621.4	89605.5	77245.5	79615.2	72792.6	66658.2	79286.2	66547.4	67739	62892.8	69747.6	81891	83824.1	73022	71190.9	71510.5	0.105663	0.965184	0.83251	0.0802289	-0.199034	0.0064622	-0.0301768	-0.235673	UNCHANGED	UNCHANGED	UNCHANGED	UNCHANGED
A0A445EX07	28	94942.1	Uncharacterized protein	ribulose-1,5-bisphosphate carboxylase/oxygenase large subunit	P:carbohydrate metabolic process; P:biosynthetic process; P:photosynthesis;	1.33244e+06	1394377	2.03523e+06	1.21223e+06	1125487	935562	1.43396e+06	1.75841e+06	1.61551e+06	1.40491e+06	1.44927e+06	1.54183e+06	1.58735e+06	1.09109e+06	1.60262e+06	1.46533e+06	0.106506	0.250228	0.0147618	0.95299	-0.540848	-0.129206	0.425457	0.0138155	UNCHANGED	UNCHANGED	UNCHANGED	UNCHANGED
A0A444YWX9	5	2234.39	GFO_IDH_MocA domain-containing protein	uncharacterized oxidoreductase At4g09670	P:metabolic process	97074.3	83718	92898.7	131182	100344	105995	123861	112235	102642	95446.3	118293	90244.3	91230.3	112507	112913	101328	0.106943	0.334857	0.432037	0.0410306	0.302429	-0.156177	-0.150983	0.307623	UNCHANGED	UNCHANGED	UNCHANGED	UNCHANGED
A0A445CKV5	25	5630.71	Elongation factor Tu	elongation factor Tu, mitochondrial		179495	205970	178277	155254	177816	160389	186729	156679	252694	184627	193552	172177	187914	164486	198701	183452	0.107379	0.627106	0.108862	0.735354	-0.192106	-0.115197	0.157434	0.0805251	UNCHANGED	UNCHANGED	UNCHANGED	UNCHANGED
A0A445BJK2	12	58854.9	Uncharacterized protein	ribulose-1,5-bisphosphate carboxylase/oxygenase large subunit	P:translation; P:lipid metabolic process; P:photosynthesis;	619751	539824	599467	482033	566459	457939	719085	770028	701493	480920	571836	441021	586347	502144	730202	497925	0.107472	0.00608692	0.937811	0.0103835	-0.223654	-0.552366	-0.0121711	0.316541	UNCHANGED	UNCHANGED	UNCHANGED	UNCHANGED
A0A445C427	12	8222.32	Uncharacterized protein	Desiccation protectant protein Lea14-like	P:response to stress; P:response to abiotic stimulus; P:response to chemical;	264675	277269	315208	305016	325217	338047	226806	285850	246029	313427	306094	325355	285717	322760	252895	314959	0.108343	0.027354	0.522042	0.228155	0.175874	0.316622	-0.0353013	-0.176049	UNCHANGED	UNCHANGED	UNCHANGED	UNCHANGED
A0A445E893	5	4607.47	Uncharacterized protein	60S ribosomal protein L22-2	P:translation;	70706	172507	104084	196865	179021	165098	54177	106400	186506	150711	103698	188589	115766	180328	115695	147666	0.108455	0.522277	0.28083	0.998905	0.639414	0.352017	-0.288285	-0.000887371	UNCHANGED	UNCHANGED	UNCHANGED	UNCHANGED
A0A444ZQ84	6	2548.25	Uncharacterized protein	outer plastidial membrane protein porin	P:transport;	248866	227083	366327	194953	188587	191470	196889	200038	181775	197853	195675	188585	280759	191670	192901	194038	0.108663	0.865389	0.518542	0.114192	-0.550707	0.00847971	0.0177143	-0.541473	UNCHANGED	UNCHANGED	UNCHANGED	UNCHANGED
A0A445BF06	6	764.561	APH domain-containing protein	methylthioribose kinase	P:biosynthetic process;	131668	159813	97566.3	94949	99713.3	73679.3	124074	123853	133753	100097	101057	126987	129683	89447.2	127227	109380	0.110585	0.13024	0.169253	0.899671	-0.535876	-0.218051	0.290242	-0.0275833	UNCHANGED	UNCHANGED	UNCHANGED	UNCHANGED
A0A445BZN2	3	2729.95	Uncharacterized protein	allene oxide cyclase, chloroplastic	P:response to stress; P:signal transduction; P:circadian rhythm; P:biosynthetic process; P:response to light stimulus; P:response to external stimulus; P:response to biotic stimulus; P:response to endogenous stimulus; P:response to chemical	224221	144407	249900	132606	134785	153545	111010	120666	185945	178494	179854	149414	206176	140312	139207	169254	0.112249	0.30469	0.0725687	0.165497	-0.555234	0.281955	0.270548	-0.566641	UNCHANGED	UNCHANGED	UNCHANGED	UNCHANGED
A0A445DS44	2	1836.1	Uncharacterized protein	protein MET1, chloroplastic		139024	113565	134839	162404	269936	170328	254545	104323	94562.5	133536	129533	160348	129143	200889	151144	141139	0.113259	0.858612	0.171618	0.696018	0.637432	-0.0988005	-0.509281	0.226951	UNCHANGED	UNCHANGED	UNCHANGED	UNCHANGED
A0A445BB34	4	5257	Flavodoxin-like domain-containing protein	probable NAD(P)H dehydrogenase (quinone) FQR1-like 1	P:metabolic process	136770	113908	124895	135437	140629	140907	145689	103883	139712	155573	183383	165757	125191	138991	129761	168238	0.113695	0.0665857	0.0245143	0.770328	0.150859	0.374641	0.27551	0.051728	UNCHANGED	UNCHANGED	UNCHANGED	UNCHANGED
A0A444YF39	7	16536.1	Uncharacterized protein	A0A444YF39_ARAHY Uncharacterized protein OS=Arachis hypogaea OX=3818 GN=Ahy_B07g088669 PE=4 SV=1		54965.7	161744	219860	186360	346603	322117	62329.3	40035	120920	108195	100666	221930	145523	285027	74428.1	143597	0.114754	0.207494	0.0896168	0.258171	0.969847	0.948106	-0.989071	-0.96733	UNCHANGED	UNCHANGED	UNCHANGED	UNCHANGED
A0A445BWQ7	11	2039.46	Uncharacterized protein	L-ascorbate oxidase homolog	P:transport; P:metabolic process;	104435	98447.7	122715	91578.3	76654.6	98657.2	38685.7	91098.3	62736.7	102195	107161	70995.7	108533	88963.4	64173.5	93450.6	0.115542	0.196465	0.748176	0.057688	-0.286844	0.542225	0.0709923	-0.758077	UNCHANGED	UNCHANGED	UNCHANGED	UNCHANGED
A0A444YL53	4	1774.92	Rhodanese domain-containing protein	rhodanese-like domain-containing protein 4, chloroplastic		179494	151132	151683	139194	146794	112708	169377	167983	151141	167324	158514	154803	160770	132899	162834	160214	0.11626	0.724872	0.06762	0.860887	-0.274668	-0.0234018	0.269668	0.0184018	UNCHANGED	UNCHANGED	UNCHANGED	UNCHANGED
A0A445A9A5	34	8728.94	Tr-type G domain-containing protein	elongation factor 2		103120	116574	113127	106291	99302.8	89835.2	80867.1	98362.3	89603	115328	125043	123142	110941	98476.2	89610.8	121171	0.116718	0.00574777	0.0156169	0.0299442	-0.17194	0.435296	0.299194	-0.308043	UNCHANGED	UNCHANGED	UNCHANGED	UNCHANGED
A0A444Y4E5	5	5203.85	Thioredoxin domain-containing protein	thioredoxin M4, chloroplastic	P:metabolic process; P:cellular homeostasis;	104437	144409	160242	107937	106190	89602.3	146879	113269	198142	89432	77416.7	130330	136363	101243	152763	99059.6	0.116758	0.141961	0.904263	0.610701	-0.429625	-0.624931	-0.0314557	0.163851	UNCHANGED	UNCHANGED	UNCHANGED	UNCHANGED
A0A445DA98	34	43216.4	Uncharacterized protein	heat shock cognate 70 kDa protein 2-like		680318	709280	634476	715820	770949	710915	573263	625825	579338	669748	708576	677979	674691	732561	592809	685434	0.117285	0.0104485	0.10519	0.040327	0.118722	0.209452	-0.0959314	-0.186661	UNCHANGED	UNCHANGED	UNCHANGED	UNCHANGED
A0A445A2S0	2	1569.63	40S ribosomal protein S7	40S ribosomal protein S7	P:nucleobase-containing compound metabolic process; P:translation;	4835.34	28003.2	67423.3	88774.7	77317	56658	4507	12024.1	46688.6	63459.9	52212.4	106230	33420.6	74249.9	21073.3	73967.5	0.117808	0.0651453	0.988824	0.611084	1.15165	1.81148	-0.00549723	-0.665325	UNCHANGED	UNCHANGED	UNCHANGED	UNCHANGED
A0A445AZP6	10	5700.63	Eukaryotic translation initiation factor 5A	eukaryotic translation initiation factor 5A-2	P:cellular component organization	142642	120667	101202	97659	103398	70517.7	142020	175312	123422	101225	101822	104933	121504	90525	146918	102660	0.119517	0.0437855	0.300143	0.258908	-0.424613	-0.517134	0.181489	0.27401	UNCHANGED	UNCHANGED	UNCHANGED	UNCHANGED
A0A444ZRY2	5	788.429	Protein transport protein SEC23	protein transport protein SEC23-like	P:transport; P:cellular component organization;	7464.67	11754	18667.8	16743.4	20701.9	21667.4	9652.53	14761.2	10286	15390.4	16713.9	12982.5	12628.8	19704.2	11566.6	15028.9	0.120384	0.14945	0.0658709	0.784815	0.641783	0.377781	-0.390762	-0.12676	UNCHANGED	UNCHANGED	UNCHANGED	UNCHANGED
A0A445E9A2	8	4859.93	Proteasome subunit beta	proteasome subunit beta type-1	P:catabolic process; P:cellular process; P:protein metabolic process;	134565	133548	120561	118424	119085	123172	129462	98150	105828	101812	115836	110330	129558	120227	111147	109326	0.120732	0.867864	0.0659844	0.152737	-0.107835	-0.0238288	-0.137124	-0.221131	UNCHANGED	UNCHANGED	UNCHANGED	UNCHANGED
A0A445AA79	3	1262.95	Carboxypeptidase	serine carboxypeptidase-like 51	P:catabolic process; P:cellular process; P:protein metabolic process	154465	153430	201370	130866	150494	123170	178736	59175.7	158195	95946.3	81057.7	120468	169755	134844	132035	99157.4	0.121068	0.442952	0.0643256	0.400713	-0.332167	-0.413132	-0.443494	-0.362529	UNCHANGED	UNCHANGED	UNCHANGED	UNCHANGED
A0A445EHK0	14	2560.26	AAA domain-containing protein	26S proteasome regulatory subunit 7	P:nucleobase-containing compound metabolic process; P:catabolic process; P:biosynthetic process; P:cellular component organization; P:protein metabolic process;	165820	176485	146261	152153	139083	115369	119654	131905	134927	104055	112454	105167	162856	135535	128829	107225	0.121501	0.0157382	0.0630193	0.0272637	-0.264931	-0.264813	-0.338023	-0.33814	UNCHANGED	UNCHANGED	UNCHANGED	UNCHANGED
A0A445E5X8	6	1509.01	NAD(P)-bd_dom domain-containing protein	UDP-glucuronic acid decarboxylase 2	P:carbohydrate metabolic process;	68524.7	68120.7	61538.3	64824.7	52102.7	44838	60872.5	58195.7	68743	67699.3	73316.3	56435.3	66061.2	53921.8	62603.7	65817	0.12469	0.61418	0.195629	0.424539	-0.292936	0.0722118	0.287592	-0.0775552	UNCHANGED	UNCHANGED	UNCHANGED	UNCHANGED
A0A445BPQ8	2	7049.33	Iso_dh domain-containing protein	isocitrate dehydrogenase [NAD] catalytic subunit 5, mitochondrial	P:generation of precursor metabolites and energy;	64500.9	76925.8	46391.5	82772.3	89749.1	73534.7	56266.2	67890.9	62243.9	59591.8	60968.8	77096	62606.1	82018.7	62133.7	65885.5	0.125088	0.597182	0.0923384	0.962641	0.38965	0.0845871	-0.31599	-0.0109278	UNCHANGED	UNCHANGED	UNCHANGED	UNCHANGED
A0A445DRV6	14	5702.66	Guanosine nucleotide diphosphate dissociation inhibitor	guanosine nucleotide diphosphate dissociation inhibitor At5g09550	P:transport; P:signal transduction; P:metabolic process;	49334	62438.3	93868.6	43124.9	45314.1	40374	41478	45616.7	46106	46190.5	51094.6	45408.9	68547	42937.7	44400.2	47564.7	0.126276	0.242022	0.112542	0.143509	-0.674849	0.0993226	0.147647	-0.626525	UNCHANGED	UNCHANGED	UNCHANGED	UNCHANGED
A0A445CQ67	28	25678.8	Uncharacterized protein	enolase	P:carbohydrate metabolic process; P:generation of precursor metabolites and energy; P:nucleobase-containing compound metabolic process; P:catabolic process;	397100	420122	581720	386349	324520	335774	423233	382781	377170	480287	564335	380895	466314	348881	394395	475172	0.127062	0.215612	0.0883981	0.295911	-0.418566	0.26881	0.445715	-0.241661	UNCHANGED	UNCHANGED	UNCHANGED	UNCHANGED
A0A444YS73	5	2307.17	Uncharacterized protein	A0A444YS73_ARAHY Uncharacterized protein OS=Arachis hypogaea OX=3818 GN=Ahy_B06g084536 PE=4 SV=1	P:translation;	215207	309543	298785	322149	336876	338771	205224	190270	281472	248480	251431	286730	274512	332599	225655	262214	0.127459	0.300884	0.00622497	0.299952	0.276915	0.216622	-0.343039	-0.282746	UNCHANGED	UNCHANGED	UNCHANGED	UNCHANGED
A0A444ZB52	2	712.178	AMP-binding domain-containing protein	A0A444ZB52_ARAHY AMP-binding domain-containing protein OS=Arachis hypogaea OX=3818 GN=Ahy_B04g068938 PE=4 SV=1		45518	50945	27318.5	54186	52887	59314	60100	51172	55886	44988	37786	44956	41260.5	55462.3	55719.3	42576.7	0.12775	0.0202226	0.0141267	0.129716	0.426747	-0.388115	-0.381445	0.433417	UNCHANGED	UNCHANGED	UNCHANGED	UNCHANGED
A0A445CUR8	6	1975.48	PKS_ER domain-containing protein	2-methylene-furan-3-one reductase	P:metabolic process	204671	146908	154276	162315	64324	64579.3	182325	163167	140404	119214	213098	188195	168618	97072.8	161965	173502	0.127785	0.725148	0.150437	0.775679	-0.796623	0.0992729	0.837817	-0.0580783	UNCHANGED	UNCHANGED	UNCHANGED	UNCHANGED
A0A445CYR7	9	70260.4	Chlorophyll a-b binding protein, chloroplastic	chlorophyll a-b binding protein of LHCII type 1	P:generation of precursor metabolites and energy; P:cellular protein modification process; P:response to light stimulus; P:photosynthesis;	1.1616e+06	1149702	1.00697e+06	993344	1.0311e+06	809689	1.20361e+06	1.1699e+06	1.03081e+06	1.05619e+06	1012481	1.16173e+06	1.10609e+06	944710	1.13478e+06	1.0768e+06	0.128854	0.447968	0.180309	0.712782	-0.227527	-0.0756594	0.188803	0.0369357	UNCHANGED	UNCHANGED	UNCHANGED	UNCHANGED
A0A444YUY3	6	1867.94	Uncharacterized protein	A0A444YUY3_ARAHY Uncharacterized protein OS=Arachis hypogaea OX=3818 GN=Ahy_B06g085559 PE=4 SV=1		69053.2	69303.3	106087	59388.1	53045.8	60394.9	51840	48728.2	60880.6	73634.1	78677.9	68429	81481.3	57609.6	53816.3	73580.4	0.129158	0.0135844	0.0130387	0.0973259	-0.50016	0.451278	0.353012	-0.598426	UNCHANGED	UNCHANGED	UNCHANGED	UNCHANGED
A0A445AAT1	6	698.22	Beta-galactosidase	beta-galactosidase 9	P:carbohydrate metabolic process;	152904	111218	226157	95232.7	111845	86309.7	170579	180647	148204	149164	147581	123210	163427	97795.8	166477	139985	0.129208	0.106222	0.0199384	0.934622	-0.740798	-0.25005	0.517427	0.0266785	UNCHANGED	UNCHANGED	UNCHANGED	UNCHANGED
A0A445E9D3	7	1551.27	3-phosphoshikimate 1-carboxyvinyltransferase	A0A445E9D3_ARAHY 3-phosphoshikimate 1-carboxyvinyltransferase OS=Arachis hypogaea OX=3818 GN=Ahy_A02g006334 PE=3 SV=1	P:biosynthetic process; P:cellular process	93894	115961	149459	84366.7	96911	82250.3	103901	86639.7	94677.7	91527	104875	113770	119771	87842.7	95072.9	103391	0.129963	0.365888	0.121087	0.217812	-0.447289	0.120999	0.235111	-0.333177	UNCHANGED	UNCHANGED	UNCHANGED	UNCHANGED
A0A444XAE3	8	8431.07	NAC-A/B domain-containing protein	nascent polypeptide-associated complex subunit alpha-like protein		375399	287854	235167	254517	196813	185812	335059	371269	284051	289528	287824	272209	299474	212381	330126	283187	0.131953	0.144055	0.0323603	0.55851	-0.495777	-0.221263	0.415101	0.140588	UNCHANGED	UNCHANGED	UNCHANGED	UNCHANGED
A0A445BEC7	10	2069.55	Coatomer subunit delta	coatomer subunit delta	P:transport;	142262	155755	114105	108400	124376	93302.3	105424	138905	132447	131718	128416	111241	137374	108693	125592	123792	0.13221	0.888567	0.24144	0.502122	-0.337851	-0.0208291	0.187658	-0.129363	UNCHANGED	UNCHANGED	UNCHANGED	UNCHANGED
A0A445BPN2	12	4567.31	Isocitrate dehydrogenase [NAD] subunit, mitochondrial	isocitrate dehydrogenase [NAD] catalytic subunit 5, mitochondrial	P:generation of precursor metabolites and energy;	238197	196342	189093	218010	260205	266264	150382	130382	162638	211177	209036	198315	207877	248160	147801	206176	0.13498	0.00462629	0.0554562	0.028702	0.255536	0.480222	-0.267392	-0.492078	UNCHANGED	UNCHANGED	UNCHANGED	UNCHANGED
A0A444WUB1	4	1177.91	Uncharacterized protein	ADP-ribosylation factor-like protein 8a		46285	37984.7	37105	31742.3	37778	23161.7	40258.3	26140	31424.7	33781	36669.3	27661.7	40458.2	30894	32607.7	32704	0.136926	0.985257	0.735839	0.195093	-0.389106	0.00425589	0.0821404	-0.311222	UNCHANGED	UNCHANGED	UNCHANGED	UNCHANGED
A0A445A7V7	4	413.113	Alanine--tRNA ligase	A0A445A7V7_ARAHY Alanine--tRNA ligase OS=Arachis hypogaea OX=3818 GN=Ahy_B03g067845 PE=3 SV=1	P:nucleobase-containing compound metabolic process; P:translation;	39965.7	76526.3	61954.3	84343	73490.7	82666.3	28988.3	63096	73630	74184.3	60031.5	66823.3	59482.1	80166.7	55238.1	67013.1	0.137141	0.450004	0.0680381	0.816825	0.430547	0.278778	-0.25856	-0.106792	UNCHANGED	UNCHANGED	UNCHANGED	UNCHANGED
A0A445AQW6	7	3579.46	Peroxidase	A0A445AQW6_ARAHY Peroxidase OS=Arachis hypogaea OX=3818 GN=Ahy_B01g053028 PE=3 SV=1	P:response to stress; P:catabolic process; P:cellular process	313155	278630	278437	286490	233764	230200	284131	365210	253992	310977	314447	291090	290074	250151	301111	305505	0.13757	0.903411	0.0476218	0.769261	-0.21362	0.0208985	0.288394	0.0538755	UNCHANGED	UNCHANGED	UNCHANGED	UNCHANGED
A0A444X0M6	2	658.228	Uncharacterized protein	A0A444X0M6_ARAHY Uncharacterized protein OS=Arachis hypogaea OX=3818 GN=Ahy_B10g101863 PE=3 SV=1	P:cellular process	40717	53641	80859	38456	31371.5	38439	67585.5	42710.5	80969.5	46286.5	43659.5	43411.5	58405.7	36088.8	63755.2	44452.5	0.13799	0.161254	0.0298321	0.759192	-0.694556	-0.520278	0.300712	0.126434	UNCHANGED	UNCHANGED	UNCHANGED	UNCHANGED
A0A444YAR2	7	8570.32	Uncharacterized protein	hypothetical protein Ahy_B07g086888		29713.6	26395.6	14935.5	18664	13800.3	10561.7	24233.7	22668.4	22741.1	15345.1	17210.4	17703.1	23681.6	14342	23214.4	16752.9	0.138561	0.00183836	0.38285	0.922406	-0.723519	-0.470611	0.224161	-0.0287462	UNCHANGED	UNCHANGED	UNCHANGED	UNCHANGED
A0A445CR31	11	4175.86	S-adenosylmethionine synthase	S-adenosylmethionine synthase 3	P:biosynthetic process; P:cellular process;	220598	210658	242526	222208	159707	176454	259376	288571	250584	235383	214485	218811	224594	186123	266177	222893	0.139727	0.0300218	0.135897	0.0487729	-0.271064	-0.256034	0.260095	0.245066	UNCHANGED	UNCHANGED	UNCHANGED	UNCHANGED
A0A445CA44	8	1189.84	Aminotran_1_2 domain-containing protein	Methionine aminotransferase	P:biosynthetic process; P:cellular process;	217659	184735	247967	181075	185376	183173	186069	161356	159034	192147	197396	199227	216787	183208	168820	196257	0.140441	0.036918	0.00605445	0.0764788	-0.242795	0.21726	0.09926	-0.360795	UNCHANGED	UNCHANGED	UNCHANGED	UNCHANGED
A0A444Y0J8	20	12785.5	Phosphoglycerate kinase	phosphoglycerate kinase, cytosolic	P:carbohydrate metabolic process; P:generation of precursor metabolites and energy; P:nucleobase-containing compound metabolic process; P:catabolic process; P:biosynthetic process;	473523	527166	617078	478500	336598	464196	547023	599529	546766	546304	624467	522136	539256	426431	564440	564302	0.140731	0.997102	0.065208	0.60869	-0.338656	-0.000350865	0.404155	0.0658499	UNCHANGED	UNCHANGED	UNCHANGED	UNCHANGED
A0A444YR98	3	460.497	4-alpha-glucanotransferase	4-alpha-glucanotransferase, chloroplastic/amyloplastic isoform X1	P:carbohydrate metabolic process; P:generation of precursor metabolites and energy	38055	30342	28030.7	28568.7	25732.7	23898	21012.5	23202.3	28539	26719	27915.7	22311	32142.6	26066.4	24251.3	25648.6	0.141309	0.64518	0.857284	0.104171	-0.302291	0.0808168	-0.0233162	-0.406424	UNCHANGED	UNCHANGED	UNCHANGED	UNCHANGED
A0A444XEA4	6	2343.34	PKS_ER domain-containing protein	Alcohol dehydrogenase superfamily	P:metabolic process	101845	91055.8	47020.4	47794.6	57399.8	37985	52766	27534.1	37383.9	36881.2	33365.1	32807.5	79973.7	47726.5	39228	34351.3	0.14223	0.548557	0.080519	0.0900204	-0.744736	-0.191519	-0.474426	-1.02764	UNCHANGED	UNCHANGED	UNCHANGED	UNCHANGED
A0A444X1J3	10	3796.37	Alpha-galactosidase	alpha-galactosidase 1	P:carbohydrate metabolic process	84568.2	86757.3	116888	73016.3	83059	71883.4	70912	68183.5	67035.3	54017.9	60798.2	60497.3	96071.1	75986.2	68710.3	58437.8	0.142332	0.0145992	0.0137584	0.0595387	-0.338364	-0.233624	-0.378837	-0.483577	UNCHANGED	UNCHANGED	UNCHANGED	UNCHANGED
A0A445ACM0	7	767.966	Starch synthase, chloroplastic/amyloplastic	A0A445ACM0_ARAHY Starch synthase, chloroplastic/amyloplastic OS=Arachis hypogaea OX=3818 GN=Ahy_B02g057701 PE=3 SV=1		217670	193723	271044	194141	184347	175775	174818	201851	208920	197754	194308	162310	227479	184754	195196	184791	0.142697	0.534787	0.997801	0.267865	-0.300126	-0.0790324	0.000285424	-0.220808	UNCHANGED	UNCHANGED	UNCHANGED	UNCHANGED
A0A445E3J7	3	8105.92	RRM domain-containing protein	A0A445E3J7_ARAHY RRM domain-containing protein OS=Arachis hypogaea OX=3818 GN=Ahy_A03g016531 PE=4 SV=1		103291	86316.6	72350.1	59928.4	79962.2	63160.7	125182	115232	106394	68612.5	108250	73602.8	87319.1	67683.8	115602	83488.3	0.145714	0.0774682	0.319797	0.0539197	-0.367487	-0.469526	0.302764	0.404803	UNCHANGED	UNCHANGED	UNCHANGED	UNCHANGED
A0A444YMV2	3	626.062	Uncharacterized protein	glutathione S-transferase L3		90563.3	94607.3	23405	123035	107382	106168	117386	64226	93863	135528	102564	127258	69525.2	112195	91825	121783	0.146424	0.1768	0.443693	0.466563	0.6904	0.407358	0.118308	0.401351	UNCHANGED	UNCHANGED	UNCHANGED	UNCHANGED
A0A444X3L0	49	4278.54	Clathrin heavy chain	clathrin heavy chain 1	P:transport;	121980	170073	109045	164201	177353	162723	118372	138385	133803	149445	157301	167666	133699	168092	130187	158137	0.146762	0.0253403	0.229866	0.865997	0.330261	0.280594	-0.0880769	-0.0384101	UNCHANGED	UNCHANGED	UNCHANGED	UNCHANGED
A0A444WSL6	5	825.224	V-type proton ATPase subunit H	A0A444WSL6_ARAHY V-type proton ATPase subunit H OS=Arachis hypogaea OX=3818 GN=Ahy_Scaffold1g106846 PE=3 SV=1	P:transport;	31007.6	31577.5	11188.2	41249.9	41916.9	31228.8	44612.5	28933.7	39044.9	31237.9	27872.2	35303.6	24591.1	38131.9	37530.4	31471.2	0.147039	0.297816	0.177082	0.186431	0.632861	-0.254024	-0.276964	0.609921	UNCHANGED	UNCHANGED	UNCHANGED	UNCHANGED
A0A444WPW6	7	9833.89	Uncharacterized protein	ATP synthase subunit beta, chloroplastic	P:nucleobase-containing compound metabolic process; P:transport; P:biosynthetic process;	16255.8	19863.8	20251.6	15764.8	17292.5	10905.1	18596.2	17243.4	19773.2	15396.2	10686.2	14662.5	18790.4	14654.1	18537.6	13581.6	0.147587	0.0387719	0.680354	0.871579	-0.358686	-0.448801	-0.109655	-0.0195401	UNCHANGED	UNCHANGED	UNCHANGED	UNCHANGED
A0A444XZI8	2	4088.12	Bet_v_1 domain-containing protein	MLP-like protein 34	P:response to stress	10589.8	10393.8	12069.7	13453	12153.7	11564	9757.73	9363.19	11247	10397.3	11160.4	11336.6	11017.8	12390.2	10122.7	10964.8	0.14882	0.25981	0.085757	0.315263	0.169369	0.11529	-0.176327	-0.122248	UNCHANGED	UNCHANGED	UNCHANGED	UNCHANGED
A0A445E4E5	11	11503.4	PEROXIDASE_4 domain-containing protein	L-ascorbate peroxidase, cytosolic	P:response to stress; P:catabolic process; P:cellular process; P:response to chemical;	767783	676379	996201	653862	664860	608354	822799	803503	668712	729669	640495	749249	813454	642359	765005	706471	0.151448	0.37658	0.164013	0.673449	-0.340682	-0.114839	0.137251	-0.0885926	UNCHANGED	UNCHANGED	UNCHANGED	UNCHANGED
A0A444XV97	16	13219.8	Fructose-bisphosphate aldolase	fructose-bisphosphate aldolase 3, chloroplastic	P:carbohydrate metabolic process; P:generation of precursor metabolites and energy; P:nucleobase-containing compound metabolic process; P:catabolic process;	361058	372328	449146	325542	354189	348642	320832	268618	226461	338987	334160	327182	394177	342791	271971	333443	0.151454	0.0891468	0.377085	0.0347167	-0.201515	0.29399	-0.0398891	-0.535394	UNCHANGED	UNCHANGED	UNCHANGED	UNCHANGED
A0A444XCP3	4	298.831	Uncharacterized protein	ABC transporter G family member 36	P:transport; P:metabolic process;	12756.3	28340.4	9401.11	28200.1	33320.8	23329.3	11859.9	16314.3	22678.4	23334.6	27947.5	28554.4	16832.6	28283.4	16950.9	26612.2	0.153352	0.0527198	0.641367	0.986613	0.748697	0.650726	-0.0878696	0.0101014	UNCHANGED	UNCHANGED	UNCHANGED	UNCHANGED
A0A445BPZ0	3	830.273	RuvB-like helicase	ruvB-like protein 1	P:nucleobase-containing compound metabolic process; P:cellular protein modification process; P:response to stress; P:biosynthetic process; P:response to external stimulus; P:response to biotic stimulus; P:cellular component organization; P:anatomical structure development;	32837	39448	42208	36636	29688	23975.7	22677.3	35446	29271.5	24312.7	26184.7	27474	38164.3	30099.9	29131.6	25990.4	0.15422	0.454817	0.337394	0.122087	-0.342467	-0.164604	-0.211777	-0.389639	UNCHANGED	UNCHANGED	UNCHANGED	UNCHANGED
A0A445CLS5	2	753.179	S-formylglutathione hydrolase	S-formylglutathione hydrolase	P:catabolic process; P:cellular process; P:response to chemical;	96952.5	69165.5	71772	60788	69928	34127	82407	68067	20980	80262	85990.5	83544	79296.7	54947.7	57151.3	83265.5	0.155215	0.23357	0.0596787	0.342065	-0.529202	0.542932	0.599661	-0.472473	UNCHANGED	UNCHANGED	UNCHANGED	UNCHANGED
A0A445EN18	13	5015.58	CYTOSOL_AP domain-containing protein	leucine aminopeptidase 1-like	P:protein metabolic process;	282447	332847	251075	261554	233635	239028	234343	255985	217220	252635	259440	262574	288790	244739	235849	258216	0.156702	0.125909	0.210239	0.114675	-0.238776	0.130715	0.0773356	-0.292156	UNCHANGED	UNCHANGED	UNCHANGED	UNCHANGED
A0A444WRT6	3	4476.07	NmrA domain-containing protein	isoflavone reductase-like protein	P:metabolic process;	159412	137203	101002	103357	103695	102152	135502	81131.5	89231.4	132747	137998	143058	132539	103068	101955	137934	0.158552	0.104548	0.000318639	0.271747	-0.362822	0.436049	0.420387	-0.378484	UNCHANGED	UNCHANGED	UNCHANGED	UNCHANGED
A0A445CLY7	15	1743.42	Glutamine amidotransferase type-2 domain-containing protein	ferredoxin-dependent glutamate synthase, chloroplastic	P:biosynthetic process; P:cellular process	157034	154200	102614	206984	179933	150976	89389.3	123459	160650	151038	152417	119786	137949	179297	124499	141080	0.159546	0.513821	0.119694	0.646113	0.378218	0.180378	-0.34584	-0.148001	UNCHANGED	UNCHANGED	UNCHANGED	UNCHANGED
A0A445B027	8	465.39	Plasma membrane ATPase	ATPase 11, plasma membrane-type	P:transport; P:cellular homeostasis;	16414.3	19550.5	20411.1	23014.6	27452.1	19440.4	17519.2	33982.7	38870.2	43670.1	26981.3	26942.9	18792	23302.4	30124	32531.5	0.159802	0.791721	0.200766	0.159727	0.31036	0.110922	0.481359	0.680797	UNCHANGED	UNCHANGED	UNCHANGED	UNCHANGED
A0A444Y8S7	7	3441.25	Peroxiredoxin	peroxiredoxin-2E, chloroplastic	P:response to stress; P:catabolic process; P:cellular homeostasis; P:response to chemical;	335686	264117	238839	226858	230780	231009	282797	272256	281357	274734	322447	235158	279547	229549	278803	277446	0.160159	0.960046	0.130933	0.980878	-0.28429	-0.00703677	0.273407	-0.0038465	UNCHANGED	UNCHANGED	UNCHANGED	UNCHANGED
A0A445BHY6	4	399.859	Uncharacterized protein	ureidoglycolate hydrolase		57904.3	58969	76197	57232	53378.3	50117.7	59335	60525.3	55777.7	45858	53579.3	55192.3	64356.8	53576	58546	51543.2	0.160892	0.0948841	0.596464	0.394547	-0.264505	-0.183788	-0.0558041	-0.136521	UNCHANGED	UNCHANGED	UNCHANGED	UNCHANGED
A0A444Z9I3	8	5012.23	Uncharacterized protein	isoflavone reductase-like protein	P:metabolic process	450331	421575	399510	394374	389356	407250	317470	327537	302184	433246	477316	478055	423805	396993	315730	462872	0.161796	0.000883687	0.0138689	0.00278111	-0.0942861	0.551922	0.221499	-0.424709	UNCHANGED	UNCHANGED	UNCHANGED	UNCHANGED
A0A445CS26	6	3578	Peroxidase	peroxidase 44	P:response to stress; P:catabolic process; P:cellular process; P:response to chemical;	88755	137462	83832.5	148438	113740	185635	68371.7	43789.2	41843.2	55464.9	67658	175811	103350	149271	51334.7	99644.8	0.16304	0.285147	0.317758	0.0530091	0.530401	0.95686	-0.58307	-1.00953	UNCHANGED	UNCHANGED	UNCHANGED	UNCHANGED
A0A445CGS6	6	20719.8	Uncharacterized protein	photosystem I reaction center subunit II, chloroplastic-like	P:photosynthesis;	201454	222769	257303	273498	266647	239650	195433	135175	164789	214472	213041	270306	227175	259932	165132	232606	0.164468	0.0581748	0.272627	0.0597562	0.194327	0.494269	-0.160243	-0.460184	UNCHANGED	UNCHANGED	UNCHANGED	UNCHANGED
A0A445C3D7	14	24984.3	FCP1 homology domain-containing protein	oxygen-evolving enhancer protein 1, chloroplastic	P:generation of precursor metabolites and energy; P:photosynthesis; P:cellular component organization;	310648	258554	242205	260551	211424	191445	368810	369032	339781	286886	272413	264606	270469	221140	359208	274635	0.165411	0.00194477	0.0679919	0.0176807	-0.290504	-0.387304	0.312557	0.409357	UNCHANGED	UNCHANGED	UNCHANGED	UNCHANGED
A0A444YWV9	18	7602.45	Proteasome endopeptidase complex	proteasome subunit alpha type-1-B-like	P:catabolic process; P:cellular process; P:protein metabolic process;	242977	198411	186326	179375	189805	161678	228539	217417	206419	194609	192693	184176	209238	176953	217459	190492	0.165934	0.0195381	0.199281	0.677709	-0.241781	-0.191007	0.10637	0.0555964	UNCHANGED	UNCHANGED	UNCHANGED	UNCHANGED
A0A445CBX6	9	16047	NmrA domain-containing protein	isoflavone reductase-like protein		370283	345494	244425	270070	260957	218534	350662	308507	323021	293949	259074	357621	320067	249854	327397	303548	0.167028	0.489689	0.178331	0.864952	-0.357291	-0.109115	0.280842	0.0326656	UNCHANGED	UNCHANGED	UNCHANGED	UNCHANGED
A0A444X1R2	3	2274.41	Epimerase domain-containing protein	GDP-mannose 3,5-epimerase 2	P:carbohydrate metabolic process; P:biosynthetic process; P:cellular process	9936.42	9957.65	21576.7	9044.96	4308.21	7378.54	5943.33	11027.2	7751.94	5183.77	4276.72	6257.44	13823.6	6910.57	8240.83	5239.31	0.16845	0.132844	0.327842	0.249967	-1.00026	-0.653413	-0.399428	-0.746272	UNCHANGED	UNCHANGED	UNCHANGED	UNCHANGED
A0A445BME0	24	4045.67	Lipoxygenase	seed linoleate 9S-lipoxygenase	P:lipid metabolic process; P:biosynthetic process; P:cellular process	462993	568594	602805	623807	672648	585154	327649	434002	434566	464124	491070	505438	544797	627203	398739	486877	0.168623	0.0787618	0.00748695	0.056883	0.203213	0.288114	-0.365375	-0.450275	UNCHANGED	UNCHANGED	UNCHANGED	UNCHANGED
A0A445ESM3	11	1940.81	AAA domain-containing protein	26S proteasome regulatory subunit 6B homolog	P:nucleobase-containing compound metabolic process; P:catabolic process; P:biosynthetic process; P:cellular component organization; P:protein metabolic process;	67256.7	94195.7	65555.6	92732.3	85051.6	101975	68073.3	43078.2	68110.3	83732.7	83148.5	94267	75669.3	93252.9	59753.9	87049.4	0.168913	0.0397923	0.365379	0.271006	0.301439	0.5428	-0.0993143	-0.340675	UNCHANGED	UNCHANGED	UNCHANGED	UNCHANGED
A0A445CPR8	3	818.005	Dolichyl-diphosphooligosaccharide--protein glycosyltransferase subunit 2	dolichyl-diphosphooligosaccharide--protein glycosyltransferase subunit 2	P:cellular protein modification process; P:biosynthetic process;	168490	72493	96970	66095.7	61287	68189.7	147030	98823	63540.5	90520.5	75796.7	62057	112651	65190.8	103131	76124.7	0.175561	0.350203	0.266224	0.81268	-0.78912	-0.438043	0.223697	-0.12738	UNCHANGED	UNCHANGED	UNCHANGED	UNCHANGED
A0A444YHD7	2	1333.24	Uncharacterized protein	ATOZI1, putative		100126	191166	188426	206718	207835	212422	81613	96604.5	160476	168723	165097	203686	159906	208992	112898	179169	0.176592	0.0709982	0.0743592	0.288636	0.386218	0.666301	-0.222127	-0.502209	UNCHANGED	UNCHANGED	UNCHANGED	UNCHANGED
A0A445C3V2	3	3347.26	PsbP domain-containing protein	oxygen-evolving enhancer protein 2, chloroplastic	P:photosynthesis;	110224	107681	56122.8	60200.4	67029.6	59439.7	139465	85697	110714	71220	83708.8	71203.3	91342.6	62223.2	111959	75377.4	0.176999	0.0852984	0.0523155	0.429755	-0.553835	-0.57076	0.276679	0.293604	UNCHANGED	UNCHANGED	UNCHANGED	UNCHANGED
A0A444WYL4	3	416.86	Acetolactate synthase	acetolactate synthase 3, chloroplastic	P:biosynthetic process; P:cellular process	34417	45792	28311.7	27837.7	28012.5	27528.5	40236.5	33089.3	35214.7	33793	32319	31070.7	36173.6	27792.9	36180.2	32394.2	0.177266	0.169248	0.00451813	0.999105	-0.38022	-0.159463	0.221021	0.000263644	UNCHANGED	UNCHANGED	UNCHANGED	UNCHANGED
A0A445BIX1	2	359.557	T-complex protein 1 subunit gamma	T-complex protein 1 subunit gamma	P:cellular process;	48527.5	48149	46251	48730.5	38923.5	38797	47166	40293.5	41928.5	44443.5	45819.5	47025.5	47642.5	42150.3	43129.3	45762.8	0.177967	0.297932	0.344586	0.108257	-0.176705	0.085507	0.118632	-0.14358	UNCHANGED	UNCHANGED	UNCHANGED	UNCHANGED
A0A445EAC9	3	1748.21	Uncharacterized protein	beta-glucosidase 11	P:carbohydrate metabolic process	23830.4	15214.4	12422.5	22637.6	30655.8	20663.3	14406.4	20577.9	16451.2	23844	22635.3	15872.2	17155.8	24652.2	17145.2	20783.8	0.178205	0.302026	0.381285	0.997955	0.523022	0.277656	-0.246257	-0.000890773	UNCHANGED	UNCHANGED	UNCHANGED	UNCHANGED
A0A444ZK37	9	8873.46	Proteasome subunit alpha type	proteasome subunit alpha type-4	P:catabolic process; P:cellular process; P:protein metabolic process;	133794	143199	117588	149985	136267	151703	141223	109529	138917	139347	147320	144169	131527	145985	129890	143612	0.180869	0.259859	0.683399	0.903277	0.150464	0.144891	-0.0236426	-0.0180699	UNCHANGED	UNCHANGED	UNCHANGED	UNCHANGED
A0A445A0P3	11	3711.05	Proteasome subunit beta	proteasome subunit beta type-2-A	P:catabolic process; P:cellular process; P:protein metabolic process;	323576	330352	314339	327906	275534	244089	455642	426627	395621	372229	400272	351840	322756	282509	425963	374780	0.181091	0.0834022	0.0306995	0.00452718	-0.192144	-0.184686	0.407745	0.400287	UNCHANGED	UNCHANGED	UNCHANGED	UNCHANGED
A0A444XZW0	4	7531.37	Bet_v_1 domain-containing protein	MLP-like protein 34	P:response to stress	428056	346251	289821	291478	314455	218752	524498	433229	364106	420123	404428	395243	354709	274895	440611	406598	0.181607	0.509429	0.0114421	0.23425	-0.367755	-0.115902	0.56472	0.312867	UNCHANGED	UNCHANGED	UNCHANGED	UNCHANGED
A0A445AVJ3	4	2002.35	Lipocln_cytosolic_FA-bd_dom domain-containing protein	temperature-induced lipocalin-1	P:lipid metabolic process; P:response to stress; P:response to chemical;	201191	123653	138865	193375	197984	187864	156542	180664	163218	193576	195363	153311	154570	193074	166808	180750	0.18246	0.419222	0.429527	0.647365	0.3209	0.115804	-0.0951628	0.109933	UNCHANGED	UNCHANGED	UNCHANGED	UNCHANGED
A0A445BEI9	2	511.94	Uncharacterized protein	Armadillo-like helical	P:metabolic process	69515	62184	50362	54051	49225	51000	67420	65337.5	65125	75716	62493	77026	60687	51425.3	65960.8	71745	0.18281	0.285761	0.0138171	0.401719	-0.238908	0.121269	0.480399	0.120222	UNCHANGED	UNCHANGED	UNCHANGED	UNCHANGED
A0A445BRN9	15	3893.58	Uncharacterized protein	L-ascorbate oxidase homolog	P:transport; P:metabolic process;	322164	253565	175249	223716	141729	143274	272043	323671	329735	197339	224764	228582	250326	169573	308483	216895	0.183964	0.011625	0.175792	0.276737	-0.561903	-0.508196	0.355091	0.301384	UNCHANGED	UNCHANGED	UNCHANGED	UNCHANGED
A0A445BPG2	11	2379.68	Uncharacterized protein	NADP-specific glutamate dehydrogenase isoform X1		371299	263220	248835	215872	250105	225200	452747	272744	273685	244764	260766	262336	294451	230392	333059	255955	0.184316	0.268862	0.0934075	0.616637	-0.353936	-0.379885	0.151799	0.177748	UNCHANGED	UNCHANGED	UNCHANGED	UNCHANGED
A0A445E4L8	8	8434.34	Uncharacterized protein	60S ribosomal protein L12	P:translation; P:cellular component organization;	462769	471585	633302	440181	433539	427197	383054	422921	389430	387588	464560	468566	522552	433639	398468	440238	0.184784	0.224602	0.8164	0.094244	-0.26908	0.143818	0.0217881	-0.39111	UNCHANGED	UNCHANGED	UNCHANGED	UNCHANGED
A0A444XFL4	6	7703.43	Uncharacterized protein	PSII 47kDa protein	P:generation of precursor metabolites and energy; P:cellular protein modification process; P:photosynthesis;	49977	81508	67466.4	42200	45688.1	60344.4	40868.5	83334.4	91490.2	51017.2	41246.7	87593.8	66317.1	49410.8	71897.7	59952.6	0.188619	0.601563	0.525141	0.773832	-0.424555	-0.262124	0.278995	0.116563	UNCHANGED	UNCHANGED	UNCHANGED	UNCHANGED
A0A444YA80	6	2812.62	Ribosomal_L16 domain-containing protein	60S ribosomal protein L10	P:translation; P:cellular component organization;	27576.7	85689.7	138065	141265	129050	133446	28483.3	71615	91433.7	114947	113654	178834	83777	134587	63844	135811	0.188715	0.0645613	0.957919	0.617978	0.683913	1.08898	0.013066	-0.392003	UNCHANGED	UNCHANGED	UNCHANGED	UNCHANGED
A0A444ZC00	10	18328.2	Multifunctional fusion protein	protein transport protein SEC23	P:transport; P:cellular component organization;	25674.6	91016.7	243256	250942	223426	198622	24982.6	64983.2	280546	171015	206469	314201	119983	224330	123504	230562	0.190129	0.301364	0.897961	0.974176	0.902798	0.900598	0.0395318	0.041732	UNCHANGED	UNCHANGED	UNCHANGED	UNCHANGED
A0A445DJL0	12	5324.48	Lactoylglutathione lyase	putative lactoylglutathione lyase	P:carbohydrate metabolic process; P:catabolic process; P:cellular process	209863	221549	210835	211852	199403	170379	219961	190415	206450	180042	181860	187931	214083	193878	205609	183278	0.19082	0.0654532	0.444741	0.414852	-0.143021	-0.165871	-0.0811169	-0.0582667	UNCHANGED	UNCHANGED	UNCHANGED	UNCHANGED
A0A444ZQB2	4	1163.47	V-type proton ATPase subunit	V-type proton ATPase subunit d2	P:transport; P:cellular homeostasis;	47701	59520.7	39914	60800.7	73856	52298.3	34318.7	50835	64774.7	56903.7	40280.3	53108.3	49045.2	62318.3	49976.1	50097.4	0.192287	0.991024	0.203017	0.933532	0.345544	0.00349837	-0.31492	0.027126	UNCHANGED	UNCHANGED	UNCHANGED	UNCHANGED
A0A444WUR2	15	17497.2	Aconitate hydratase	aconitate hydratase 1	P:generation of precursor metabolites and energy;	151717	168083	227547	142238	147373	149414	147349	155494	142855	173103	178969	166937	182449	146342	148566	173003	0.193646	0.00854916	0.00282593	0.220115	-0.318153	0.219693	0.241456	-0.296391	UNCHANGED	UNCHANGED	UNCHANGED	UNCHANGED
A0A445DMY3	5	2812.38	Uncharacterized protein	ras-related protein Rab11A	P:transport; P:signal transduction;	40162	13786.8	22302.8	20539.5	7818.7	5883.24	23510.3	21995.7	23632.7	28008.4	25018.9	21835.4	25417.2	11413.8	23046.2	24954.2	0.195869	0.362604	0.051568	0.776011	-1.15502	0.114753	1.1285	-0.141274	UNCHANGED	UNCHANGED	UNCHANGED	UNCHANGED
A0A444ZV61	8	2107.72	Pyruvate dehydrogenase E1 component subunit alpha	pyruvate dehydrogenase E1 component subunit alpha, mitochondrial	P:nucleobase-containing compound metabolic process; P:biosynthetic process;	20843.4	24874.8	34492.6	35344.1	34699.7	30289.2	15994.4	16943.2	19993.5	22326.7	29876	20829.3	26737	33444.3	17643.7	24344	0.197883	0.092865	0.0474793	0.0977127	0.322927	0.464413	-0.458196	-0.599682	UNCHANGED	UNCHANGED	UNCHANGED	UNCHANGED
A0A445A120	19	2673.98	Sucrose synthase	sucrose synthase	P:carbohydrate metabolic process; P:cellular process	90633.6	161120	196607	104416	104405	95758.8	111302	224471	202355	140755	161097	133605	149454	101527	179376	145152	0.200197	0.390778	0.00749151	0.555548	-0.55784	-0.305419	0.515707	0.263286	UNCHANGED	UNCHANGED	UNCHANGED	UNCHANGED
A0A444XBQ6	4	431.164	Coatomer subunit beta	coatomer subunit beta-1	P:transport;	14110.3	16602.7	25980.7	26445	27356	21493.7	15106.7	35522	30317.7	31825	30343.3	27643.3	18897.9	25098.2	26982.1	29937.2	0.200246	0.660788	0.0921309	0.319108	0.40936	0.149937	0.254355	0.513778	UNCHANGED	UNCHANGED	UNCHANGED	UNCHANGED
A0A445CIL2	25	3735	Phospholipase D	phospholipase D alpha 1	P:lipid metabolic process; P:catabolic process; P:cellular process;	88725.6	343974	390039	432072	431522	393754	60779	144580	320775	374505	359188	431856	274246	419116	175378	388517	0.200286	0.055648	0.29627	0.459897	0.611878	1.14751	-0.109373	-0.645004	UNCHANGED	UNCHANGED	UNCHANGED	UNCHANGED
A0A445A3G6	3	920.714	PPM-type phosphatase domain-containing protein	probable protein phosphatase 2C 39	P:cellular protein modification process	50097	48667.5	94525	50451	43034	13468	52284	35035	39247	26729	34093.5	48125	64429.8	35651	42188.7	36315.8	0.200964	0.510779	0.961435	0.235001	-0.853786	-0.216257	0.0266561	-0.610873	UNCHANGED	UNCHANGED	UNCHANGED	UNCHANGED
A0A445CTD3	4	23383.9	40S ribosomal protein S27	40S ribosomal protein S27-2	P:translation; P:cellular component organization;	239390	203481	181657	192848	178973	169803	177194	158204	148031	95420.5	152395	161409	208176	180541	161143	136408	0.20182	0.330617	0.111936	0.067362	-0.205474	-0.24041	-0.4044	-0.369464	UNCHANGED	UNCHANGED	UNCHANGED	UNCHANGED
A0A445DA80	18	5731.12	Uncharacterized protein	heat shock cognate 70 kDa protein-like	P:response to stress; P:response to abiotic stimulus; P:cellular process; P:response to chemical;	12690.7	19958.3	6902.83	20585.5	25817.6	15311.6	9608.13	21706.7	25661.3	14280.7	15617.7	15517	13184	20571.5	18992	15138.5	0.20191	0.471175	0.150786	0.397073	0.641867	-0.327178	-0.442433	0.526612	UNCHANGED	UNCHANGED	UNCHANGED	UNCHANGED
A0A445E7D6	8	5642.15	PfkB domain-containing protein	adenosine kinase 2	P:nucleobase-containing compound metabolic process; P:biosynthetic process;	178217	191807	205849	165097	186352	178237	201340	118811	154055	161024	123039	125131	191958	176562	158069	136398	0.202058	0.465639	0.0436203	0.249948	-0.120614	-0.212725	-0.372349	-0.280238	UNCHANGED	UNCHANGED	UNCHANGED	UNCHANGED
A0A444Y6B9	17	5448.31	Uncharacterized protein	ADP,ATP carrier protein 3, mitochondrial	P:transport; P:response to chemical;	79316.2	85396.1	113063	118496	136271	95091.5	60728.7	94348.3	90672.8	126903	135651	102191	92591.8	116620	81916.6	121582	0.203257	0.0533645	0.765975	0.512595	0.332855	0.569697	0.060115	-0.176728	UNCHANGED	UNCHANGED	UNCHANGED	UNCHANGED
A0A445DHF2	14	2949.44	Pyruvate kinase	pyruvate kinase, cytosolic isozyme	P:carbohydrate metabolic process; P:generation of precursor metabolites and energy; P:nucleobase-containing compound metabolic process; P:catabolic process;	128093	132124	159987	133548	114002	119878	110715	100645	104225	123963	129131	107612	140068	122476	105195	120235	0.203321	0.102347	0.809312	0.0289255	-0.193621	0.192795	-0.0266421	-0.413058	UNCHANGED	UNCHANGED	UNCHANGED	UNCHANGED
A0A444ZV18	3	507.297	Purple acid phosphatase	probable inactive purple acid phosphatase 1	P:metabolic process; P:cellular process	68417	58181.3	47079.3	74768.5	92454	58789	53452	45232.7	43593	56106.3	54646.5	47634	57892.6	75337.2	47425.9	52795.6	0.204211	0.252323	0.0887257	0.202559	0.379984	0.154743	-0.512944	-0.287703	UNCHANGED	UNCHANGED	UNCHANGED	UNCHANGED
A0A445B5D1	31	51995.3	Uncharacterized protein	actin-7	P:response to stress; P:response to light stimulus; P:response to endogenous stimulus; P:post-embryonic development; P:cell growth; P:cell differentiation; P:response to chemical;	816459	818436	700321	709204	748961	546823	788275	671026	613117	827725	775495	715119	778406	668329	690806	772780	0.206698	0.24974	0.209227	0.246868	-0.219963	0.161777	0.209498	-0.172242	UNCHANGED	UNCHANGED	UNCHANGED	UNCHANGED
A0A444Y4X2	5	10675.2	Uncharacterized protein	photosystem II 32 kDa protein	P:generation of precursor metabolites and energy; P:photosynthesis;	250898	165468	158152	173713	135997	98350.3	213670	242281	196055	176749	156039	160808	191506	136020	217335	164532	0.206822	0.0236952	0.276347	0.473489	-0.493575	-0.401556	0.27455	0.182531	UNCHANGED	UNCHANGED	UNCHANGED	UNCHANGED
A0A445DCA2	2	344.179	Uncharacterized protein	subtilisin-like protease Glyma18g48580	P:protein metabolic process;	176796	100477	38235.4	56278.5	50991	20821.5	180993	114243	79225	136111	113713	29380	105169	42697	124820	93068	0.207236	0.511559	0.216089	0.714163	-1.30051	-0.423496	1.12415	0.247137	UNCHANGED	UNCHANGED	UNCHANGED	UNCHANGED
A0A445DIP1	4	493.575	Uncharacterized protein	peroxisomal fatty acid beta-oxidation multifunctional protein MFP2	P:lipid metabolic process; P:catabolic process; P:cellular process;	49717.3	60892.3	82020.7	77257.7	77654	80641.3	20872	58705	42800.3	86671	83627	51265.7	64210.1	78517.7	40792.4	73854.6	0.207738	0.104027	0.702945	0.181402	0.290217	0.856385	-0.0883304	-0.654499	UNCHANGED	UNCHANGED	UNCHANGED	UNCHANGED
A0A445CRL7	2	496.146	Uncharacterized protein	cytochrome P450 98A2	P:metabolic process;	15463	25362	47572	40225	39984	57576.5	6342	17202	35729	38223	43799.5	37508	29465.7	45928.5	19757.7	39843.5	0.213451	0.0847119	0.378782	0.490278	0.640355	1.01193	-0.205045	-0.576622	UNCHANGED	UNCHANGED	UNCHANGED	UNCHANGED
A0A444YJC8	5	7178.76	Germin-like protein	rhicadhesin receptor	P:transport; P:multicellular organism development; P:cellular process;	468225	372940	645757	374342	374736	383818	359229	279429	304139	346117	389563	341909	495641	377632	314266	359196	0.214205	0.184797	0.301216	0.0951524	-0.392314	0.192785	-0.0722095	-0.657308	UNCHANGED	UNCHANGED	UNCHANGED	UNCHANGED
A0A445EC54	2	1496.17	Uncharacterized protein	alcohol dehydrogenase 1-like	P:catabolic process; P:cellular process; P:response to chemical;	27975	109623	52278	20062	24306	36847	38468	39284	69228	513882	505392	48682	63292	27071.7	48993.3	355985	0.21678	0.116995	0.0991743	0.614703	-1.22524	2.86116	3.71696	-0.369438	UNCHANGED	UNCHANGED	UNCHANGED	UNCHANGED
A0A445BUM7	5	2704.82	Pribosyltran domain-containing protein	adenine phosphoribosyltransferase 1	P:nucleobase-containing compound metabolic process; P:biosynthetic process;	107635	97058.8	62347.5	70120.1	23947.6	77915.2	187094	96428.2	96901.7	80863.4	91327.3	104383	89013.7	57327.6	126808	92191.2	0.217951	0.325331	0.127352	0.317258	-0.634796	-0.459945	0.685397	0.510546	UNCHANGED	UNCHANGED	UNCHANGED	UNCHANGED
A0A444Y6Y4	24	13063.6	Aconitase domain-containing protein	aconitate hydratase, cytoplasmic	P:generation of precursor metabolites and energy;	9407.63	10671.2	10271.1	10248.2	12126.3	10890.6	13850.4	17092.1	14454.6	9206.43	10821.2	10847.5	10116.6	11088.4	15132.4	10291.7	0.217967	0.0129495	0.361225	0.00917675	0.132315	-0.556153	-0.107562	0.580907	UNCHANGED	UNCHANGED	UNCHANGED	UNCHANGED
A0A445BD24	3	1921.11	Carboxypeptidase	serine carboxypeptidase-like 27	P:catabolic process; P:cellular process; P:protein metabolic process;	64876	60408.3	103892	57620.7	56722	54246.7	62831.7	67181.3	57082.7	72290	68942	55318.3	76392.1	56196.4	62365.2	65516.8	0.218463	0.624783	0.152712	0.376637	-0.442945	0.0711227	0.221386	-0.292682	UNCHANGED	UNCHANGED	UNCHANGED	UNCHANGED
A0A445A8F7	10	2731.23	Aldo_ket_red domain-containing protein	NADP-dependent D-sorbitol-6-phosphate dehydrogenase	P:metabolic process;	166499	122056	110752	122522	105666	79027.3	189596	114028	127267	144893	112627	115772	133102	102405	143630	124431	0.221344	0.492779	0.248073	0.733638	-0.378244	-0.207018	0.281053	0.109827	UNCHANGED	UNCHANGED	UNCHANGED	UNCHANGED
A0A445D1S9	3	327.164	Tr-type G domain-containing protein	eukaryotic peptide chain release factor GTP-binding subunit ERF3A	P:cellular component organization;	17351.5	40470	45892.1	46065.8	47176.1	48446.1	16310.6	34993.8	36473	36858.7	34876.6	39996.6	34571.2	47229.3	29259.1	37244	0.222751	0.296557	0.00369148	0.651338	0.450111	0.34812	-0.342676	-0.240685	UNCHANGED	UNCHANGED	UNCHANGED	UNCHANGED
A0A445C2G3	8	2281.55	Iso_dh domain-containing protein	isocitrate dehydrogenase [NAD] regulatory subunit 1, mitochondrial	P:generation of precursor metabolites and energy;	68977.1	67314.3	57588.7	54592.2	64201.4	54263.7	56786.3	51922	49912	57885	58500	58326.3	64626.7	57685.7	52873.4	58237.1	0.22331	0.058931	0.874066	0.0454978	-0.163915	0.139395	0.0137241	-0.289587	UNCHANGED	UNCHANGED	UNCHANGED	UNCHANGED
A0A445CQC8	10	1787.34	Aamy domain-containing protein	1,4-alpha-glucan-branching enzyme 1, chloroplastic/amyloplastic isoform X1	P:carbohydrate metabolic process; P:generation of precursor metabolites and energy; P:biosynthetic process	73328	113238	145682	89867.3	81200	66082	61479.7	98903.7	120551	91341.7	86013.7	82638	110749	79049.8	93644.7	86664.4	0.223878	0.709415	0.361469	0.562476	-0.486465	-0.111757	0.132679	-0.242029	UNCHANGED	UNCHANGED	UNCHANGED	UNCHANGED
A0A445E437	36	10140.9	Tr-type G domain-containing protein	elongation factor 2		339819	424834	425511	458781	460020	411484	268349	326965	290204	372245	376159	380505	396722	443428	295173	376303	0.225572	0.00931956	0.0141966	0.0376936	0.160575	0.350336	-0.236806	-0.426568	UNCHANGED	UNCHANGED	UNCHANGED	UNCHANGED
A0A445A444	3	3072.02	Histone H2A	probable histone H2A.1	P:cellular component organization;	204633	228656	329730	206972	186868	202541	197821	237270	333705	177316	196492	233246	254340	198794	256265	202351	0.225613	0.283587	0.848885	0.974055	-0.355484	-0.340779	0.0255891	0.0108832	UNCHANGED	UNCHANGED	UNCHANGED	UNCHANGED
A0A444ZR08	3	1202.63	4-hydroxy-4-methyl-2-oxoglutarate aldolase	putative 4-hydroxy-4-methyl-2-oxoglutarate aldolase 2	P:nucleobase-containing compound metabolic process	63185.5	96126	136160	83254	51479.5	62066.5	56107	73479	61608	72113.3	78398.7	77877.7	98490.5	65600	63731.3	76129.9	0.227172	0.0875248	0.332331	0.184662	-0.586289	0.25646	0.214767	-0.627982	UNCHANGED	UNCHANGED	UNCHANGED	UNCHANGED
A0A445EDU9	7	23335.5	Histone H4	Histone H4	P:nucleobase-containing compound metabolic process; P:response to stress; P:biosynthetic process; P:response to abiotic stimulus; P:cellular component organization; P:response to chemical;	68295.4	241393	515186	498765	483097	410316	43421.4	116803	337332	386463	406158	666929	274958	464059	165852	486517	0.227899	0.0641518	0.823659	0.525945	0.755098	1.55259	0.0681795	-0.729313	UNCHANGED	UNCHANGED	UNCHANGED	UNCHANGED
Q06H28	4	9099.01	Photosystem I psaH protein	photosystem I reaction center subunit VI-2, chloroplastic	P:photosynthesis;	194395	307137	355222	232061	219586	197239	279304	181034	363978	191725	216511	314227	285584	216295	274772	240821	0.228172	0.627755	0.56122	0.886605	-0.400916	-0.190272	0.15496	-0.0556838	UNCHANGED	UNCHANGED	UNCHANGED	UNCHANGED
A0A444Y0G1	4	1132.64	Sulfurtransferase	thiosulfate/3-mercaptopyruvate sulfurtransferase 1, mitochondrial isoform X2	P:metabolic process; P:cellular process;	65288.3	58280.3	48640.7	82123.3	99583.7	52382.3	58350.7	40385.3	43202.7	59829	61263.3	63507.7	57403.1	78029.8	47312.9	61533.3	0.230571	0.0665189	0.298569	0.243138	0.442896	0.379135	-0.342657	-0.278896	UNCHANGED	UNCHANGED	UNCHANGED	UNCHANGED
A0A445DY01	8	750.143	Uncharacterized protein	mitochondrial-processing peptidase subunit alpha	P:transport; P:cellular component organization; P:protein metabolic process;	79033.3	78229.4	63831.7	68935.3	68345.8	59203	89609.2	67509	67808.1	85229.9	81898.7	73043.5	73698.1	65494.7	74975.4	80057.3	0.233992	0.567682	0.0389042	0.891956	-0.17025	0.0946153	0.289655	0.0247899	UNCHANGED	UNCHANGED	UNCHANGED	UNCHANGED
A0A444XR59	2	456.945	Glutathione reductase	glutathione reductase, cytosolic	P:generation of precursor metabolites and energy; P:cellular homeostasis; P:response to chemical;	140300	151939	239238	124220	137008	137956	131881	114432	126403	113174	149009	139636	177159	133062	124238	133939	0.234536	0.460805	0.943349	0.16976	-0.41295	0.108467	0.00948649	-0.511931	UNCHANGED	UNCHANGED	UNCHANGED	UNCHANGED
A0A444Z7M9	5	1549.38	40S ribosomal protein S3a	40S ribosomal protein S3a	P:translation;	14244	52117.3	260305	212339	220936	213834	7920	37242	93698.5	126213	134273	236236	108889	215703	46286.8	165574	0.235336	0.0515957	0.230856	0.480344	0.986192	1.8388	-0.381568	-1.23418	UNCHANGED	UNCHANGED	UNCHANGED	UNCHANGED
A0A444X3K8	12	25334.7	RuBisCO_large domain-containing protein	ribulose-1,5-bisphosphate carboxylase/oxygenase large subunit	P:carbohydrate metabolic process; P:biosynthetic process; P:photosynthesis;	39407.9	33775	24606.8	29411	27150.5	18557.8	33862.1	39586.3	41066.4	26313.7	38472.5	36488.5	32596.6	25039.8	38171.6	33758.3	0.236734	0.36867	0.15688	0.313564	-0.380498	-0.177259	0.431019	0.227781	UNCHANGED	UNCHANGED	UNCHANGED	UNCHANGED
A0A445A3S6	8	8752.89	Malate dehydrogenase	malate dehydrogenase, mitochondrial	P:carbohydrate metabolic process; P:generation of precursor metabolites and energy;	399211	354202	369420	390113	387694	404159	367288	380431	302038	411603	426490	392350	374278	393988	349919	410148	0.236865	0.0828578	0.22036	0.427456	0.0740436	0.229124	0.057991	-0.0970892	UNCHANGED	UNCHANGED	UNCHANGED	UNCHANGED
A0A445AAF6	9	2906.33	Lactoylglutathione lyase	lactoylglutathione lyase isoform X1		170524	196656	199203	213753	191333	208714	176486	212193	186330	208096	220747	190859	188794	204600	191670	206567	0.238108	0.338801	0.866811	0.847815	0.11599	0.107989	0.0138075	0.0218083	UNCHANGED	UNCHANGED	UNCHANGED	UNCHANGED
A0A445E1T5	4	2346.2	Carboxypeptidase	serine carboxypeptidase-like 40	P:catabolic process; P:cellular process; P:protein metabolic process;	45671	20101.5	16926	14821.5	18974	9465.5	38992.5	92313	27312	22023	28730.5	21322.5	27566.2	14420.3	52872.5	24025.3	0.238875	0.225421	0.057059	0.313699	-0.934794	-1.13796	0.736452	0.939619	UNCHANGED	UNCHANGED	UNCHANGED	UNCHANGED
A0A445B3G3	14	5292.75	Uncharacterized protein	outer plastidial membrane protein porin	P:transport;	370691	340059	531902	337992	298482	351663	331023	311740	273288	396889	368290	372093	414217	329379	305350	379091	0.240497	0.0184276	0.0531223	0.153314	-0.33064	0.312078	0.202795	-0.439923	UNCHANGED	UNCHANGED	UNCHANGED	UNCHANGED
A0A444YQ05	4	4445.35	Complex1_30kDa domain-containing protein	NADH dehydrogenase subunit 9	P:metabolic process;	28909	38128	42724.7	28372.3	77872.3	68064.3	14188.7	22146.7	63532.3	64916.3	78563.3	79868.3	36587.2	58103	33289.2	74449.3	0.241633	0.0620775	0.361207	0.845097	0.667273	1.1612	0.357646	-0.136285	UNCHANGED	UNCHANGED	UNCHANGED	UNCHANGED
A0A444XBH9	4	626.189	U2 snRNP auxiliary factor large subunit	splicing factor U2af large subunit B isoform X6	P:nucleobase-containing compound metabolic process;	12629	15046.7	28936	13071.3	10940.3	11551.3	5357	14483.3	15610	18392.7	41152.3	15084.7	18870.6	11854.3	11816.8	24876.6	0.242467	0.212517	0.188242	0.306992	-0.670722	1.07395	1.06937	-0.6753	UNCHANGED	UNCHANGED	UNCHANGED	UNCHANGED
A0A444X1A7	14	8824.19	Uncharacterized protein	caffeoyl-CoA O-methyltransferase	P:biosynthetic process; P:cellular process; P:secondary metabolic process	299888	301441	287605	352562	299473	307186	283142	279895	271790	327679	294685	318561	296311	319740	278275	313642	0.243199	0.0272644	0.767373	0.0309833	0.109788	0.172603	-0.027784	-0.0905998	UNCHANGED	UNCHANGED	UNCHANGED	UNCHANGED
A0A445B963	6	3492.15	Uncharacterized protein	agmatine deiminase	P:biosynthetic process; P:cellular process	133177	80730	146532	72108.3	111630	81334.3	133172	230562	158267	127106	118917	111084	120146	88357.7	174001	119036	0.245227	0.136472	0.0746511	0.203181	-0.443367	-0.547697	0.429968	0.534298	UNCHANGED	UNCHANGED	UNCHANGED	UNCHANGED
A0A444ZIT0	4	1214.08	GST C-terminal domain-containing protein	glutathionyl-hydroquinone reductase YqjG		55413	54965	48460.5	52022.7	49429	40476.7	53833.3	58295.3	39925.3	61029	56349	51409.7	52946.2	47309.4	50684.7	56262.6	0.246594	0.418461	0.115492	0.724099	-0.162398	0.150626	0.250047	-0.0629769	UNCHANGED	UNCHANGED	UNCHANGED	UNCHANGED
A0A445EW07	3	1709.13	Peptidyl-prolyl cis-trans isomerase	peptidyl-prolyl cis-trans isomerase CYP19-4	P:cellular protein modification process;	136101	142039	169937	178699	150284	174601	99191.5	127307	123501	148700	162496	159484	149359	167861	116666	156893	0.247937	0.0145497	0.326031	0.0747704	0.168484	0.427394	-0.0974859	-0.356396	UNCHANGED	UNCHANGED	UNCHANGED	UNCHANGED
A0A444ZHQ7	2	514.943	Uncharacterized protein	subtilisin-like protease SBT2.5	P:protein metabolic process;	33242	18932	48017	23568.5	21049.5	21433.5	18130.5	15502.5	22915	20222.5	27089	13760	33397	22017.2	18849.3	20357.2	0.248513	0.750051	0.69426	0.168752	-0.60109	0.111023	-0.113092	-0.825205	UNCHANGED	UNCHANGED	UNCHANGED	UNCHANGED
A0A445EEN9	8	2293.16	AAA domain-containing protein	26S proteasome regulatory subunit 4 homolog A	P:catabolic process; P:cellular process; P:protein metabolic process;	44542.7	104291	87556	113738	93451.3	104730	37096.7	64370.3	107549	106812	111085	129779	78796.7	103973	69672.1	115892	0.250232	0.100087	0.263736	0.753734	0.400007	0.734126	0.156566	-0.177553	UNCHANGED	UNCHANGED	UNCHANGED	UNCHANGED
A0A444Y7T3	14	2634.18	Epimerase domain-containing protein	UDP-D-apiose/UDP-D-xylose synthase 2	P:metabolic process;	40435.2	30753.5	30220.8	45487	43190.4	33087.2	33492.4	19580.5	16135.4	38519.5	39998.8	27109.3	33803.1	40588.2	23069.4	35209.2	0.250423	0.143695	0.389329	0.161479	0.263903	0.609971	-0.205108	-0.551176	UNCHANGED	UNCHANGED	UNCHANGED	UNCHANGED
A0A445DA96	26	11084.2	Uncharacterized protein	probable mediator of RNA polymerase II transcription subunit 37c	P:response to stress; P:response to abiotic stimulus; P:cellular process; P:response to chemical;	76064.7	79229.3	65945.3	73874	62371.3	62913	76385	77630.7	60903.3	72277.7	74867.3	67497	73746.4	66386.1	71639.7	71547.3	0.250773	0.988055	0.29863	0.769162	-0.151692	-0.00186063	0.108017	-0.0418149	UNCHANGED	UNCHANGED	UNCHANGED	UNCHANGED
A0A445EPK8	2	1165.75	Uncharacterized protein	thiol protease aleurain-like	P:catabolic process; P:cellular process; P:protein metabolic process;	435391	193750	148995	539818	296115	396367	228546	187346	149649	191311	282220	245045	259379	410767	188514	239525	0.253621	0.21724	0.0858546	0.483312	0.663259	0.345509	-0.778141	-0.460391	UNCHANGED	UNCHANGED	UNCHANGED	UNCHANGED
A0A445DAA8	26	2817.16	Transket_pyr domain-containing protein	2-oxoglutarate dehydrogenase, mitochondrial-like	P:generation of precursor metabolites and energy;	181651	229440	198626	227132	253446	206819	85088.8	127447	170696	192563	180116	178798	203239	229132	127744	183826	0.25364	0.0891738	0.0331373	0.0564746	0.173005	0.525082	-0.317842	-0.669919	UNCHANGED	UNCHANGED	UNCHANGED	UNCHANGED
A0A445A3U6	9	2442.85	Uncharacterized protein	UBP1-associated protein 2C	P:nucleobase-containing compound metabolic process;	190009	185271	208355	177061	189513	93960	160845	126044	137521	154341	164863	172179	194545	153511	141470	163794	0.253697	0.123547	0.752456	0.0129323	-0.341759	0.211388	0.0935393	-0.459608	UNCHANGED	UNCHANGED	UNCHANGED	UNCHANGED
A0A444X8G9	26	3166.22	Alpha-1,4 glucan phosphorylase	alpha-1,4 glucan phosphorylase L isozyme, chloroplastic/amyloplastic	P:carbohydrate metabolic process; P:generation of precursor metabolites and energy; P:catabolic process;	400929	349327	440929	368082	375517	324281	371944	380527	390316	279159	277137	296029	397062	355960	380929	284108	0.255008	0.000267664	0.013593	0.582886	-0.157648	-0.423082	-0.325274	-0.0598404	UNCHANGED	UNCHANGED	UNCHANGED	UNCHANGED
A0A445APA9	13	1344.2	Peptidase_S9 domain-containing protein	dipeptidyl peptidase family member 6	P:protein metabolic process	62759.7	58917.7	56587.3	57803.3	57765	48565.3	67603.7	64873.3	61901	62369.7	75765.7	53495.3	59421.6	54711.2	64792.7	63876.9	0.256482	0.897567	0.270002	0.0924514	-0.11915	-0.0205365	0.223457	0.124844	UNCHANGED	UNCHANGED	UNCHANGED	UNCHANGED
A0A445BKU9	19	9205.76	Uncharacterized protein	calreticulin	P:transport; P:response to stress; P:signal transduction; P:response to chemical;	486113	435573	387568	407873	390807	396326	466551	504952	432556	468823	419468	467585	436418	398335	468020	451959	0.257878	0.576937	0.0344297	0.421379	-0.131727	-0.0503787	0.182207	0.100858	UNCHANGED	UNCHANGED	UNCHANGED	UNCHANGED
A0A445CWP3	2	390.49	Uncharacterized protein	pleiotropic drug resistance protein 1	P:transport;	36347.5	34468.4	46194	38635.7	47662.9	68972	32481.4	38090.7	34042	42745.4	57718.1	44751.5	39003.3	51756.9	34871.4	48405	0.258915	0.0531558	0.757658	0.360174	0.408155	0.473113	-0.0965943	-0.161552	UNCHANGED	UNCHANGED	UNCHANGED	UNCHANGED
A0A445E872	2	541.753	Pectinesterase	pectinesterase-like isoform X1	P:carbohydrate metabolic process; P:catabolic process; P:cellular component organization;	106988	79231.6	32781	105504	100787	98275.4	74188.9	94322.1	69058.4	89593.9	83966.8	72372.4	73000.2	101522	79189.8	81977.7	0.259954	0.777609	0.0236522	0.800978	0.475824	0.0499169	-0.308493	0.117414	UNCHANGED	UNCHANGED	UNCHANGED	UNCHANGED
A0A445DYD3	2	484.07	Uncharacterized protein	glycerophosphodiester phosphodiesterase GDPDL3	P:lipid metabolic process; P:cellular component organization;	106787	86887	58741	115120	94165.5	102917	89463.5	110290	69217.5	146828	142104	87980.5	84138.3	104068	89657	125638	0.260136	0.181823	0.337893	0.777996	0.306684	0.486783	0.271751	0.091653	UNCHANGED	UNCHANGED	UNCHANGED	UNCHANGED
A0A444WUX6	5	1393.7	Iso_dh domain-containing protein	isocitrate dehydrogenase [NAD] regulatory subunit 1, mitochondrial isoform X1	P:generation of precursor metabolites and energy;	148440	99879.1	141436	124708	190589	171538	189091	135692	133040	132898	142433	104224	129918	162278	152608	126518	0.261218	0.293015	0.19019	0.393105	0.320867	-0.270483	-0.359127	0.232223	UNCHANGED	UNCHANGED	UNCHANGED	UNCHANGED
A0A445DUP5	9	2008.47	Xylose isomerase	xylose isomerase	P:carbohydrate metabolic process	34268.7	28362.1	23355.1	33352.2	39903.1	29734.7	57469.5	49840	34129.7	49972.4	39683.1	45161.9	28662	34330	47146.4	44939.1	0.261249	0.78278	0.0651899	0.0708291	0.260332	-0.0691765	0.388503	0.718012	UNCHANGED	UNCHANGED	UNCHANGED	UNCHANGED
A0A445A9G0	3	386.014	Bac_surface_Ag domain-containing protein	protein TOC75, chloroplastic isoform X1	P:nucleobase-containing compound metabolic process; P:transport; P:biosynthetic process; P:cellular component organization;	32463.4	37846.4	46082.8	37300.4	18355.6	33423.5	20894.9	44069.9	42991.2	29238.3	43518.9	26866.7	38797.5	29693.2	35985.4	33208	0.263553	0.777065	0.674614	0.758105	-0.385833	-0.115879	0.161399	-0.108555	UNCHANGED	UNCHANGED	UNCHANGED	UNCHANGED
A0A444YUK8	15	3434.97	Plasma membrane ATPase	plasma membrane ATPase 4	P:transport; P:cellular homeostasis;	30148.5	59074.4	91533.1	37486.6	39289.7	35068.2	9141.2	31039.7	45609.4	54115.7	44309.8	50075.3	60252	37281.5	28596.8	49500.3	0.265792	0.1295	0.0168828	0.200168	-0.692549	0.791585	0.408977	-1.07516	UNCHANGED	UNCHANGED	UNCHANGED	UNCHANGED
A0A445D3E3	17	2468.06	Isocitrate dehydrogenase [NADP]	isocitrate dehydrogenase [NADP]	P:generation of precursor metabolites and energy;	148102	163202	232986	215175	204098	230115	130175	147691	142513	187190	200379	208542	181430	216463	140126	198704	0.267351	0.00194411	0.143353	0.196176	0.254705	0.503891	-0.123501	-0.372687	UNCHANGED	UNCHANGED	UNCHANGED	UNCHANGED
A0A444WYH7	6	712.755	Eukaryotic translation initiation factor 3 subunit D	eukaryotic translation initiation factor 3 subunit D-like	P:cellular component organization;	68555	70194.7	48902	72067.7	66791	77883	49928.3	53145	56329.3	79690	74286	73221.3	62550.6	72247.2	53134.2	75732.4	0.268555	0.00115404	0.408436	0.25462	0.207919	0.51127	0.0679694	-0.235381	UNCHANGED	UNCHANGED	UNCHANGED	UNCHANGED
A0A445DF33	25	2072.82	Uncharacterized protein	argininosuccinate synthase, chloroplastic	P:biosynthetic process; P:cellular process;	188805	174749	174327	165262	180834	122584	177273	179992	155640	167449	159393	147094	179294	156227	170969	157978	0.270382	0.25216	0.928687	0.409901	-0.198685	-0.114004	0.016088	-0.0685926	UNCHANGED	UNCHANGED	UNCHANGED	UNCHANGED
A0A444XYE0	12	11602.6	GTP-binding nuclear protein	GTP-binding nuclear protein Ran-3	P:transport;	509418	455509	623100	498935	440425	446566	440082	335016	300956	430823	480720	423365	529342	461975	358685	444969	0.270801	0.131267	0.546719	0.0578489	-0.196385	0.310989	-0.0541106	-0.561485	UNCHANGED	UNCHANGED	UNCHANGED	UNCHANGED
A0A445CIR4	15	36276.1	Uncharacterized protein	heat shock 70 kDa protein 5	P:response to stress; P:metabolic process; P:response to abiotic stimulus; P:cellular process; P:response to chemical;	30956.7	19511.3	24600.5	34897.6	165520	38816.1	28431.8	41869.5	22253.4	56636.6	55661.9	33205.5	25022.9	79744.6	30851.6	48501.3	0.272388	0.139742	0.513058	0.431525	1.67214	0.65268	-0.717363	0.302098	UNCHANGED	UNCHANGED	UNCHANGED	UNCHANGED
A0A444X199	10	5855.96	Proteasome subunit beta	proteasome subunit beta type-5	P:catabolic process; P:cellular process; P:protein metabolic process;	125245	102011	73751	80842.7	87073.8	74690.9	118118	80036.4	79398.4	86165.4	107790	75232.8	100336	80869.1	92517.6	89729.2	0.272502	0.869962	0.434549	0.71085	-0.311172	-0.0441493	0.149989	-0.117034	UNCHANGED	UNCHANGED	UNCHANGED	UNCHANGED
A0A445BCY2	29	17888.5	Elongation factor 1-alpha	elongation factor 1-alpha	P:reproduction; P:post-embryonic development; P:cellular component organization; P:cell growth; P:cell differentiation;	691916	1.06937e+06	1.39899e+06	843354	787350	750346	582406	822052	839990	709215	779515	832355	1.05343e+06	793683	748149	773695	0.275987	0.791448	0.678261	0.238442	-0.408453	0.0484383	-0.0367988	-0.49369	UNCHANGED	UNCHANGED	UNCHANGED	UNCHANGED
A0A445A9Y6	31	43626.7	Uncharacterized protein	heat shock cognate 70 kDa protein 2	P:response to stress; P:response to abiotic stimulus; P:cellular process; P:response to chemical;	272876	273593	413617	258722	267861	256197	230469	259473	252643	257875	261439	252182	320029	260926	247528	257165	0.276362	0.352126	0.445786	0.202447	-0.294559	0.0551027	-0.0209465	-0.370608	UNCHANGED	UNCHANGED	UNCHANGED	UNCHANGED
A0A444XJC4	9	22858.5	Uncharacterized protein	photosystem II CP47 chlorophyll apoprotein	P:generation of precursor metabolites and energy; P:cellular protein modification process; P:photosynthesis;	259191	359409	487151	258124	324905	260456	314823	523409	527994	290703	305643	295807	368584	281162	455408	297384	0.276869	0.088296	0.507544	0.418722	-0.390591	-0.614832	0.0809269	0.305168	UNCHANGED	UNCHANGED	UNCHANGED	UNCHANGED
A0A444XKT9	5	3692.28	TCTP domain-containing protein	translationally-controlled tumor protein homolog	P:cellular process;	228490	263422	342084	250005	223787	230110	232230	224992	596073	239117	246949	236816	277999	234634	351098	240961	0.27726	0.41959	0.496802	0.595801	-0.244666	-0.543078	0.0383849	0.336796	UNCHANGED	UNCHANGED	UNCHANGED	UNCHANGED
A0A445CG04	25	5055	Uncharacterized protein	probable mitochondrial-processing peptidase subunit beta, mitochondrial	P:generation of precursor metabolites and energy; P:transport; P:cellular component organization; P:protein metabolic process;	278274	281362	240175	286988	272952	295075	205540	212752	206188	290366	322188	296910	266603	285005	208160	303155	0.279881	0.000678033	0.194495	0.0121818	0.0962924	0.54236	0.0890662	-0.357002	UNCHANGED	UNCHANGED	UNCHANGED	UNCHANGED
A0A445CQS8	4	4438.34	Uncharacterized protein	secoisolariciresinol dehydrogenase-like	P:metabolic process	238937	227760	162292	179563	183260	177021	202300	153521	171471	238895	241553	236360	209663	179948	175764	238936	0.282896	0.0115943	1.49874e-05	0.290069	-0.220495	0.442987	0.409047	-0.254434	UNCHANGED	UNCHANGED	UNCHANGED	UNCHANGED
A0A445C618	5	43982	Uncharacterized protein	photosystem II D2-reaction-center protein	P:generation of precursor metabolites and energy; P:photosynthesis;	525891	647431	1.0002e+06	543705	600381	489116	613022	855351	850730	591326	555501	610885	724508	544400	773034	585904	0.28438	0.08367	0.312966	0.781012	-0.412333	-0.399868	0.105996	0.0935312	UNCHANGED	UNCHANGED	UNCHANGED	UNCHANGED
A0A444Z1D2	13	3030.15	Glutamine synthetase	glutamine synthetase nodule isozyme	P:biosynthetic process; P:cellular process;	127183	127387	161262	126393	125000	122515	118109	124478	105898	127878	115833	116036	138611	124636	116162	119916	0.286861	0.607776	0.317809	0.148639	-0.153315	0.0458848	-0.0557046	-0.254904	UNCHANGED	UNCHANGED	UNCHANGED	UNCHANGED
A0A445DCQ0	2	466.748	Uncharacterized protein	zinc finger CCCH domain-containing protein ZFN-like isoform X1		167887	139641	134616	166123	170224	149640	283209	133910	146412	138072	142198	126115	147381	161996	187844	135462	0.294188	0.33702	0.0286302	0.454722	0.136403	-0.471648	-0.258071	0.34998	UNCHANGED	UNCHANGED	UNCHANGED	UNCHANGED
A0A445EH47	11	10936.3	Malate dehydrogenase	malate dehydrogenase, cytoplasmic isoform X2	P:carbohydrate metabolic process; P:generation of precursor metabolites and energy;	27171.5	26781.6	19996.4	27914.2	33467.1	24927.7	39354.9	53258.5	32120.8	32772.2	29699.1	29499	24649.8	28769.6	41578.1	30656.8	0.294562	0.157628	0.525548	0.0629659	0.222969	-0.439616	0.0916597	0.754245	UNCHANGED	UNCHANGED	UNCHANGED	UNCHANGED
A0A444YS80	11	1577.3	Uncharacterized protein	mitochondrial phosphate carrier protein 3, mitochondrial	P:transport;	154986	181271	207704	193792	206719	200037	126393	185287	152749	180192	205814	167608	181320	200183	154810	184538	0.295042	0.218911	0.257062	0.310326	0.142777	0.253423	-0.117398	-0.228044	UNCHANGED	UNCHANGED	UNCHANGED	UNCHANGED
A0A445ARZ8	2	832.968	Glutamate dehydrogenase	Glutamate dehydrogenase 2	P:metabolic process; P:cellular process	36710	59663.5	43084	39819.5	38039	36793	40996	27466.5	23863	26686	35115	26925.5	46485.8	38217.2	30775.2	29575.5	0.296746	0.848938	0.0410117	0.141824	-0.28257	-0.0573641	-0.369818	-0.595024	UNCHANGED	UNCHANGED	UNCHANGED	UNCHANGED
A0A445BPI7	3	497.596	Ubiquitin carboxyl-terminal hydrolase	ubiquitin carboxyl-terminal hydrolase 6	P:cellular protein modification process; P:catabolic process	33860	67101	63102	58340	70465.7	78160	13714.5	60541	56712.7	83097	36231	60057.7	54687.7	68988.6	43656.1	59795.2	0.297871	0.469243	0.56583	0.579266	0.335142	0.453848	-0.206327	-0.325034	UNCHANGED	UNCHANGED	UNCHANGED	UNCHANGED
A0A445AW73	22	4029.6	Uncharacterized protein	dihydrolipoyl dehydrogenase, mitochondrial	P:generation of precursor metabolites and energy; P:cellular homeostasis;	211835	226905	261567	201320	239269	173876	188506	217673	199124	208925	211304	188676	233436	204822	201768	202968	0.29913	0.919385	0.931535	0.136161	-0.188654	0.00855966	-0.0131168	-0.210331	UNCHANGED	UNCHANGED	UNCHANGED	UNCHANGED
A0A445B220	10	2604.18	Matrin-type domain-containing protein	splicing factor 3A subunit 2	P:nucleobase-containing compound metabolic process; P:cellular component organization;	30339.8	25110.1	30662.7	27142	26869.8	25373.6	19527.6	24980.7	28255.3	17029.7	18807.5	21415.6	28704.2	26461.8	24254.5	19084.3	0.29922	0.143471	0.00601307	0.226634	-0.117353	-0.345867	-0.471524	-0.24301	UNCHANGED	UNCHANGED	UNCHANGED	UNCHANGED
A0A444YW80	6	3559.16	Uncharacterized protein	cysteine proteinase RD21A	P:catabolic process; P:cellular process; P:protein metabolic process;	67319	392837	313064	385572	389977	350650	317129	358988	352319	83447	51324.3	313677	257740	375400	342812	149483	0.299293	0.0818854	0.0538727	0.437819	0.542511	-1.19744	-1.32845	0.4115	UNCHANGED	UNCHANGED	UNCHANGED	UNCHANGED
A0A445DJI2	12	5221.75	Uncharacterized protein	ras-related protein RABB1c	P:transport; P:signal transduction;	135056	115165	117572	118428	118455	97582.5	118129	120684	97292.6	111405	131865	118974	122598	111489	112035	120748	0.300989	0.411688	0.369541	0.337581	-0.137036	0.108044	0.115104	-0.129976	UNCHANGED	UNCHANGED	UNCHANGED	UNCHANGED
A0A444ZF59	7	1478.08	Uncharacterized protein	GTP-binding protein SAR1A	P:transport; P:cellular component organization;	77502.7	59810.3	57280.3	66281	54633	34303	72085.3	54556.6	55672.9	66898.7	65047.7	63529.3	64864.4	51739	60771.6	65158.6	0.310148	0.487951	0.226363	0.656002	-0.326176	0.100557	0.332702	-0.09403	UNCHANGED	UNCHANGED	UNCHANGED	UNCHANGED
A0A444XJ98	7	3227.87	Uncharacterized protein	aspartic proteinase	P:lipid metabolic process; P:catabolic process; P:protein metabolic process;	370890	303872	319159	294312	333170	272987	273633	355542	304113	298403	332533	292580	331307	300156	311096	307839	0.31069	0.909638	0.739813	0.55417	-0.142455	-0.0151858	0.0364606	-0.0908084	UNCHANGED	UNCHANGED	UNCHANGED	UNCHANGED
A0A445B5H4	3	595.305	PCI domain-containing protein	26S proteasome non-ATPase regulatory subunit 12 homolog A	P:catabolic process; P:cellular process; P:protein metabolic process;	37249	28153.3	17776	36248.3	39764	29296.3	27449.3	32772	37259.7	37514	38711.7	38663.7	27726.1	35102.9	32493.7	38296.4	0.314004	0.112558	0.361189	0.491298	0.340344	0.237052	0.125621	0.228913	UNCHANGED	UNCHANGED	UNCHANGED	UNCHANGED
A0A444YDJ3	54	2174.96	Clathrin heavy chain	clathrin heavy chain 2	P:transport;	378437	339483	216841	308255	397555	447928	343577	241664	263215	382495	389343	393022	311587	384579	282819	388287	0.314738	0.0276714	0.932222	0.644385	0.303645	0.457244	0.0138415	-0.139758	UNCHANGED	UNCHANGED	UNCHANGED	UNCHANGED
A0A445A368	2	461.722	Phosphotransferase	hexokinase-1	P:carbohydrate metabolic process; P:generation of precursor metabolites and energy; P:nucleobase-containing compound metabolic process; P:catabolic process; P:cellular homeostasis;	30676.8	35898.8	53360.2	37039.4	59553.2	57536.4	22036.8	40421.1	30065	50840.2	47496.3	31690.1	39978.6	51376.3	30841	43342.2	0.315371	0.190909	0.436647	0.351893	0.361875	0.490923	-0.245331	-0.374379	UNCHANGED	UNCHANGED	UNCHANGED	UNCHANGED
A0A444XAW9	15	2859.99	Pyrophosphate--fructose 6-phosphate 1-phosphotransferase subunit alpha	pyrophosphate--fructose 6-phosphate 1-phosphotransferase subunit alpha	P:carbohydrate metabolic process; P:generation of precursor metabolites and energy; P:nucleobase-containing compound metabolic process; P:catabolic process; P:photosynthesis; P:response to chemical;	146853	135855	224570	143730	116226	146363	117647	135531	125010	180452	213206	147062	169093	135439	126063	180240	0.318136	0.0520124	0.104287	0.204284	-0.320169	0.515779	0.412271	-0.423676	UNCHANGED	UNCHANGED	UNCHANGED	UNCHANGED
A0A445BDL3	3	654.214	PPIase cyclophilin-type domain-containing protein	UPF0235 protein At5g63440 isoform X2	P:cellular protein modification process; P:cell cycle	124289	107629	99558.3	90761.3	115823	82928	120922	122606	119109	80404	82957	78454	110492	96504.1	120879	80605	0.319143	1.66789e-05	0.187267	0.230543	-0.195283	-0.584621	-0.259721	0.129617	UNCHANGED	UNCHANGED	UNCHANGED	UNCHANGED
A0A444ZRX9	3	4951.35	Xyloglucan endotransglucosylase/hydrolase	xyloglucan endotransglucosylase/hydrolase 2	P:carbohydrate metabolic process; P:cellular component organization;	117264	114698	107162	78180.8	129790	55467.8	41175.2	76335	105173	76146.1	80065	64964	113041	87812.7	74227.7	73725.1	0.319185	0.980212	0.564353	0.107242	-0.364345	-0.00980335	-0.252275	-0.606816	UNCHANGED	UNCHANGED	UNCHANGED	UNCHANGED
A0A445APT4	4	909.343	V-type proton ATPase subunit H	V-type proton ATPase subunit H	P:transport;	56341.8	48670.8	68731.3	55697.4	51195.1	43607.9	46031	30817.7	37742.1	38256.8	43176.1	45960.7	57914.6	50166.8	38196.9	42464.5	0.319772	0.436442	0.139546	0.0543227	-0.207195	0.152802	-0.240474	-0.600471	UNCHANGED	UNCHANGED	UNCHANGED	UNCHANGED
A0A444ZCQ0	18	5303.32	Aminomethyltransferase	aminomethyltransferase, mitochondrial	P:catabolic process; P:cellular process;	189163	223292	240308	249338	248249	217378	213421	220988	236268	196082	214842	227558	217588	238321	223559	212827	0.321144	0.397779	0.140651	0.735286	0.131312	-0.0709707	-0.163225	0.0390581	UNCHANGED	UNCHANGED	UNCHANGED	UNCHANGED
A0A444X3E3	6	8106.84	Uncharacterized protein	40S ribosomal protein S16	P:nucleobase-containing compound metabolic process; P:translation;	70173.7	146132	178979	160924	168400	174869	42319.3	100642	174276	160590	150016	201300	131762	168064	105746	170635	0.326182	0.19085	0.881196	0.630033	0.351085	0.690315	0.0219009	-0.317329	UNCHANGED	UNCHANGED	UNCHANGED	UNCHANGED
A0A445C9Y8	18	4462.68	Protein disulfide-isomerase	protein disulfide-isomerase	P:response to stress; P:cellular homeostasis;	363121	346311	340786	425299	351968	355760	356449	363861	302689	445336	374915	368794	350073	377676	341000	396348	0.327473	0.150918	0.614342	0.679656	0.109493	0.216999	0.0696207	-0.0378846	UNCHANGED	UNCHANGED	UNCHANGED	UNCHANGED
A0A444YD70	4	1471.2	Uncharacterized protein	hypothetical protein Ahy_B07g087884	P:nucleobase-containing compound metabolic process; P:biosynthetic process	6983	6120	28160	5346.33	6444.33	5472.33	5307	5795	5970	5020.67	4483.5	5478.5	13754.3	5754.33	5690.67	4994.22	0.329719	0.116958	0.166889	0.326017	-1.25717	-0.188338	-0.204389	-1.27322	UNCHANGED	UNCHANGED	UNCHANGED	UNCHANGED
A0A445BQC1	3	6364.73	Uncharacterized protein	Cytochrome c oxidase subunit 5b-2, mitochondrial	P:generation of precursor metabolites and energy; P:nucleobase-containing compound metabolic process; P:transport; P:biosynthetic process;	161538	158635	45903.3	165532	187089	145940	158623	196217	174263	206108	160097	220862	122025	166187	176368	195689	0.330264	0.415679	0.247724	0.241905	0.445625	0.149974	0.235755	0.531406	UNCHANGED	UNCHANGED	UNCHANGED	UNCHANGED
A0A444X8I3	6	11610.8	Uncharacterized protein	40S ribosomal protein S19-1	P:translation; P:cellular component organization;	79448.7	241544	262549	256723	264986	253713	56617.7	114715	261316	226542	245397	268712	194514	258474	144216	246883	0.331642	0.173695	0.41148	0.58158	0.410147	0.775599	-0.0661903	-0.431642	UNCHANGED	UNCHANGED	UNCHANGED	UNCHANGED
A0A445EUW8	16	27887.6	Uncharacterized protein	photosystem I P700 apoprotein A2	P:generation of precursor metabolites and energy; P:cellular protein modification process; P:photosynthesis;	327589	518413	992332	380115	448575	348047	300129	582047	631193	428130	486113	437686	612778	392246	504457	450643	0.331675	0.63434	0.167264	0.652427	-0.643607	-0.162744	0.200228	-0.280634	UNCHANGED	UNCHANGED	UNCHANGED	UNCHANGED
A0A445B683	14	8883.05	Uncharacterized protein	caffeic acid 3-O-methyltransferase	P:biosynthetic process; P:cellular process; P:secondary metabolic process;	330264	229657	229530	239614	215006	221544	345995	263766	256043	362737	357079	280093	263150	225388	288601	333303	0.333396	0.318107	0.0175039	0.595666	-0.223475	0.207756	0.564423	0.133191	UNCHANGED	UNCHANGED	UNCHANGED	UNCHANGED
A0A445DV73	29	26100.4	Uncharacterized protein	luminal-binding protein	P:response to stress; P:signal transduction; P:catabolic process; P:response to abiotic stimulus; P:protein metabolic process; P:response to chemical;	153939	400082	417277	376952	404338	487922	96420.3	390573	480285	385128	357812	549715	323766	423071	322426	430885	0.338226	0.452677	0.914796	0.993012	0.385946	0.418334	0.0264051	-0.00598256	UNCHANGED	UNCHANGED	UNCHANGED	UNCHANGED
A0A445AKS9	9	6757.27	Proteasome endopeptidase complex	proteasome subunit alpha type-4	P:catabolic process; P:cellular process; P:protein metabolic process;	49851.9	50664.4	41083.5	55334.5	26993.1	27052.7	43947	33369.6	40985.5	45163.6	56322.7	50871.5	47200	36460.1	39434	50786	0.340002	0.0654061	0.224182	0.152108	-0.372467	0.364989	0.478112	-0.259345	UNCHANGED	UNCHANGED	UNCHANGED	UNCHANGED
A0A444XI53	13	86527.6	Uncharacterized protein	ADP-ribosylation factor 2 isoform X1	P:cellular protein modification process; P:transport;	475569	445508	370700	414663	413958	322322	444490	529523	474455	550229	463845	417696	430593	383648	482823	477256	0.343487	0.909796	0.131511	0.26068	-0.166542	-0.0167281	0.314983	0.165169	UNCHANGED	UNCHANGED	UNCHANGED	UNCHANGED
A0A445ADV8	6	602.376	Uncharacterized protein	elongation factor 1-gamma		144773	195980	194576	170092	150820	157510	159292	179307	171183	165607	164974	172009	178443	159474	169927	167530	0.345721	0.720001	0.255778	0.657598	-0.16214	-0.0204998	0.0710957	-0.0705441	UNCHANGED	UNCHANGED	UNCHANGED	UNCHANGED
A0A445DWK8	15	3309.34	KH type-2 domain-containing protein	40S ribosomal protein S3-3	P:DNA metabolic process; P:translation; P:response to stress;	109264	187692	191762	167387	203953	214905	47990.7	172076	164715	169294	201275	197364	162906	195415	128261	189311	0.345824	0.214634	0.745444	0.513123	0.262503	0.561679	-0.0457838	-0.34496	UNCHANGED	UNCHANGED	UNCHANGED	UNCHANGED
A0A445D9Y2	10	1419.52	Uncharacterized protein	T-complex protein 1 subunit zeta 1	P:cellular process;	95594.7	86078.3	52026	77062.3	60082.3	44731.3	60392.3	70017	79082.3	88753	88412.3	81222	77899.7	60625.3	69830.6	86129.1	0.346079	0.0514191	0.0574828	0.602309	-0.361696	0.302642	0.50658	-0.157759	UNCHANGED	UNCHANGED	UNCHANGED	UNCHANGED
A0A445E0I3	2	390.604	Pyruvate carboxyltransferase domain-containing protein	probable 2-isopropylmalate synthase isoform X1	P:biosynthetic process; P:cellular process	33916.9	35814.7	26400.3	19803.4	27718.3	33174	25178.5	53465.1	46847.6	23033.8	20539	22805.6	32043.9	26898.6	41830.4	22126.1	0.346772	0.0832388	0.294805	0.338616	-0.252523	-0.918801	-0.281778	0.384501	UNCHANGED	UNCHANGED	UNCHANGED	UNCHANGED
A0A445EWV7	9	2570.53	WD_REPEATS_REGION domain-containing protein	protein transport protein SEC13 homolog B	P:transport; P:cellular component organization;	45103.6	40603	52480.2	45361.9	29113.8	43888.7	34925.6	33979.2	30559	42296.2	45670.4	40091	46062.3	39454.8	33154.6	42685.8	0.349151	0.0104297	0.58423	0.0253134	-0.223385	0.364549	0.113556	-0.474378	UNCHANGED	UNCHANGED	UNCHANGED	UNCHANGED
A0A445AQ01	2	878.706	Uncharacterized protein	L-ascorbate oxidase homolog	P:transport; P:metabolic process;	221897	175220	255375	249095	150624	83057.5	334092	326577	143700	219216	244016	219904	217497	160926	268123	227712	0.350094	0.554828	0.243697	0.488568	-0.434605	-0.235686	0.500817	0.301898	UNCHANGED	UNCHANGED	UNCHANGED	UNCHANGED
A0A445EM30	8	1529.4	Uncharacterized protein	galactokinase	P:carbohydrate metabolic process; P:catabolic process;	100469	90536	31658.3	107668	110271	79549	73304.7	47026	66834.3	77674	67905.7	69664.3	74221.1	99162.7	62388.3	71748	0.350529	0.3305	0.0560643	0.632358	0.417967	0.201662	-0.466858	-0.250553	UNCHANGED	UNCHANGED	UNCHANGED	UNCHANGED
A0A444YK12	2	508.93	Uncharacterized protein	mannosylglycoprotein endo-beta-mannosidase	P:carbohydrate metabolic process	71975.5	79193.5	64049.5	62025.5	70527.5	66836	64042.5	48574	60028.5	64232.5	68100	69130.5	71739.5	66463	57548.3	67154.3	0.352382	0.119732	0.821956	0.0899004	-0.110216	0.222706	0.0149291	-0.317994	UNCHANGED	UNCHANGED	UNCHANGED	UNCHANGED
A0A444ZY94	14	1001.59	UVR domain-containing protein	chaperone protein ClpC, chloroplastic	P:protein metabolic process	26244.6	124593	130310	127430	138217	122991	21955.1	56705.6	102933	84649.2	88612.9	118030	93716.1	129546	60531.2	97097.4	0.352385	0.22801	0.0472544	0.464912	0.467095	0.681753	-0.415959	-0.630617	UNCHANGED	UNCHANGED	UNCHANGED	UNCHANGED
A0A444XW77	34	27404.5	ATP synthase subunit beta	ATP synthase subunit beta, mitochondrial	P:generation of precursor metabolites and energy; P:nucleobase-containing compound metabolic process; P:transport; P:biosynthetic process;	1255629	1079638	1.458e+06	1.23366e+06	994497	1.1557e+06	1.09579e+06	1.1295e+06	758342	1.20395e+06	1271752	1.19124e+06	1.26442e+06	1127953	994544	1.22231e+06	0.353169	0.133169	0.275258	0.169447	-0.164772	0.297509	0.115909	-0.346371	UNCHANGED	UNCHANGED	UNCHANGED	UNCHANGED
A0A445C2K4	9	15376.7	Chlorophyll a-b binding protein, chloroplastic	chlorophyll a-b binding protein 8, chloroplastic	P:generation of precursor metabolites and energy; P:cellular protein modification process; P:response to light stimulus; P:photosynthesis;	97565.7	241636	377382	185047	131084	142382	259458	169820	508875	148108	151622	298889	238861	152838	312718	199540	0.355653	0.373033	0.422603	0.599445	-0.644172	-0.648185	0.384674	0.388687	UNCHANGED	UNCHANGED	UNCHANGED	UNCHANGED
A0A445B7R9	4	2321.54	MPN domain-containing protein	26S proteasome non-ATPase regulatory subunit 7 homolog A	P:catabolic process; P:cellular process; P:protein metabolic process;	95639.3	90918.3	41507	67477.3	55169	49165.3	59743	50789	70543.7	78778.3	53174.7	75543.5	76021.6	57270.6	60358.6	69165.5	0.359461	0.422657	0.286809	0.438649	-0.408615	0.196494	0.272259	-0.33285	UNCHANGED	UNCHANGED	UNCHANGED	UNCHANGED
A0A444X337	8	38892.6	Uncharacterized protein	PsbC	P:generation of precursor metabolites and energy; P:cellular protein modification process; P:photosynthesis;	210217	310447	409437	267982	259682	219329	292703	496346	481742	342276	334446	392516	310034	248998	423597	356413	0.362534	0.379457	0.0103999	0.262854	-0.316293	-0.249143	0.517416	0.450265	UNCHANGED	UNCHANGED	UNCHANGED	UNCHANGED
A0A444WQJ4	8	28213.2	Uncharacterized protein	photosystem II cp47 protein	P:generation of precursor metabolites and energy; P:cellular protein modification process; P:photosynthesis;	121951	196467	237022	213785	259622	199615	142416	265562	312912	278553	233216	279499	185147	224341	240296	263756	0.363484	0.68124	0.171475	0.416869	0.277024	0.134388	0.233513	0.376148	UNCHANGED	UNCHANGED	UNCHANGED	UNCHANGED
A0A445CEU3	12	1726.95	Succinate-semialdehyde dehydrogenase	succinate-semialdehyde dehydrogenase, mitochondrial	P:catabolic process; P:cellular process;	175885	191840	118346	188657	222132	162023	173951	166966	176420	164636	149365	188794	162024	190937	172446	167598	0.364599	0.702788	0.325371	0.667268	0.236894	-0.041135	-0.18809	0.0899392	UNCHANGED	UNCHANGED	UNCHANGED	UNCHANGED
A0A445E1I0	5	842.863	PKS_ER domain-containing protein	chloroplast envelope quinone oxidoreductase homolog	P:metabolic process	85946	74462.7	88568	79381.3	95479	95018.7	115358	96843.7	116712	74271.7	80214.7	81454.7	82992.2	89959.7	109638	78647	0.365832	0.0102617	0.119886	0.0261826	0.116302	-0.479281	-0.193887	0.401697	UNCHANGED	UNCHANGED	UNCHANGED	UNCHANGED
A0A445C6W9	34	3538.68	Clathrin heavy chain	clathrin heavy chain 2	P:transport;	78628.3	98082.3	74403.8	72403.7	75503.9	80102.3	78044.7	82275.2	85833.7	84308.3	83713.7	82248	83704.8	76003.3	82051.2	83423.3	0.369711	0.588037	0.0328976	0.839046	-0.139248	0.0239272	0.134389	-0.0287869	UNCHANGED	UNCHANGED	UNCHANGED	UNCHANGED
A0A445BUE9	5	2538.32	Uncharacterized protein	NADH dehydrogenase [ubiquinone] flavoprotein 2, mitochondrial	P:generation of precursor metabolites and energy; P:response to stress;	47867	42831.7	68039.3	54131.3	46109.3	18555.5	55443.3	36931	24146.3	53379	70479.3	23725.7	52912.7	39598.7	38840.2	49194.7	0.371616	0.562159	0.610566	0.302834	-0.418159	0.34095	0.313048	-0.446062	UNCHANGED	UNCHANGED	UNCHANGED	UNCHANGED
A0A445DEB0	8	3328	Alpha-galactosidase	alpha-galactosidase 1	P:carbohydrate metabolic process	82566.9	124254	210210	98657	130228	61532	100230	56122.1	83999.4	82252.8	66824	160367	139010	96805.6	80117.1	103148	0.376898	0.507621	0.865417	0.212338	-0.522029	0.364534	0.0915532	-0.79501	UNCHANGED	UNCHANGED	UNCHANGED	UNCHANGED
A0A445D5H5	19	10755.8	Uncharacterized protein	probable UDP-arabinopyranose mutase 1	P:nucleobase-containing compound metabolic process;	316247	325772	338561	395043	302561	365753	267934	222362	240696	324080	335552	325701	326860	354452	243664	328444	0.380863	0.00348023	0.398186	0.00484332	0.11692	0.430756	-0.109943	-0.423779	UNCHANGED	UNCHANGED	UNCHANGED	UNCHANGED
A0A445BUL7	9	25257	Uncharacterized protein	photosystem I P700 apoprotein A2	P:generation of precursor metabolites and energy; P:cellular protein modification process; P:photosynthesis;	112748	238319	390669	177783	215929	84902.6	147622	331673	342062	248027	209482	208719	247245	159538	273786	222076	0.38152	0.467472	0.202014	0.807921	-0.63204	-0.301994	0.47715	0.147104	UNCHANGED	UNCHANGED	UNCHANGED	UNCHANGED
A0A445BZ79	3	4819.82	Bet_v_1 domain-containing protein	MLP-like protein 34	P:response to stress	154744	134477	144652	165740	160834	137864	124950	243846	126462	176046	188978	166884	144624	154812	165086	177303	0.38252	0.774745	0.103864	0.634393	0.0982106	0.102996	0.195693	0.190908	UNCHANGED	UNCHANGED	UNCHANGED	UNCHANGED
A0A445DND4	25	3859.11	C2 NT-type domain-containing protein	protein PLASTID MOVEMENT IMPAIRED 1	P:translation	353782	448862	271223	437513	441887	362361	457835	439974	417473	518901	558981	448618	357956	413921	438427	508834	0.385124	0.109381	0.083161	0.201025	0.209572	0.214858	0.29784	0.292555	UNCHANGED	UNCHANGED	UNCHANGED	UNCHANGED
A0A445CCX1	14	9893.28	Catalase	catalase isozyme 1	P:response to stress; P:catabolic process; P:cellular process; P:response to chemical	40684.1	144601	196076	180572	172080	162715	71490.5	169296	423682	169939	138482	221307	127120	171789	221489	176576	0.386427	0.69808	0.855683	0.456078	0.434442	-0.326951	0.03965	0.801043	UNCHANGED	UNCHANGED	UNCHANGED	UNCHANGED
A0A445ARH5	7	26284.5	Histone H2B	probable histone H2B.3	P:cellular component organization;	177651	465946	1.07809e+06	792147	855183	845629	207938	436206	721860	563192	729682	955451	573895	830986	455335	749442	0.388847	0.191142	0.518602	0.716649	0.534038	0.718889	-0.149008	-0.333859	UNCHANGED	UNCHANGED	UNCHANGED	UNCHANGED
A0A445E6Z9	2	504.444	Uncharacterized protein	DEAD-box ATP-dependent RNA helicase 38	P:transport; P:response to stress; P:metabolic process; P:response to abiotic stimulus; P:response to endogenous stimulus; P:response to chemical;	13864	19615.5	24972.5	21151.5	21733	25679.5	17375	21211	24342	31461.5	27214	30470.5	19484	22854.7	20976	29715.3	0.391119	0.0215996	0.0231331	0.713743	0.230199	0.502468	0.378719	0.10645	UNCHANGED	UNCHANGED	UNCHANGED	UNCHANGED
A0A444WNG8	6	2368.2	Aldo_ket_red domain-containing protein	probable aldo-keto reductase 2		48009.4	67335.6	41110.3	59356.6	61373	58238.3	48651.4	55573.2	62423.9	61272	58345.4	56291.1	52151.8	59656	55549.5	58636.1	0.396072	0.506036	0.583386	0.719025	0.19395	0.0780163	-0.0248761	0.091058	UNCHANGED	UNCHANGED	UNCHANGED	UNCHANGED
A0A445B5L1	3	437.781	OBG-type G domain-containing protein	developmentally-regulated G-protein 3	P:translation;	14570.6	18499.8	28338	12545.7	15929.5	19869.5	6436.08	9887	15014.8	15992.8	20999	15259.1	20469.5	16114.9	10446	17417	0.398267	0.0861041	0.663959	0.104697	-0.345078	0.737547	0.112098	-0.970527	UNCHANGED	UNCHANGED	UNCHANGED	UNCHANGED
A0A445A6Q1	5	1943.83	Uncharacterized protein	BAG family molecular chaperone regulator 7		31404	158063	126293	131230	147356	145091	13438	73288.7	114800	120015	123670	138351	105253	141225	67175.4	127345	0.401672	0.114916	0.13932	0.472822	0.424137	0.92274	-0.149254	-0.647857	UNCHANGED	UNCHANGED	UNCHANGED	UNCHANGED
A0A444X619	5	472.096	Eukaryotic translation initiation factor 3 subunit B	eukaryotic translation initiation factor 3 subunit B	P:cellular component organization;	19153	67465.3	84859	69981.7	84456.3	73488.3	9574	32747.7	53164	65118.3	61253	60500.7	57159.1	75975.4	31828.6	62290.7	0.402902	0.0740543	0.0406359	0.338877	0.41055	0.968694	-0.286517	-0.844662	UNCHANGED	UNCHANGED	UNCHANGED	UNCHANGED
A0A445CMI3	2	775.465	Uncharacterized protein	serine/arginine-rich splicing factor SR34B isoform X2	P:nucleobase-containing compound metabolic process;	41951.5	69355	71369	62472	43284	45451.5	28819	68721	80235	80383	65913.5	65042	60891.8	50402.5	59258.3	70446.2	0.404374	0.531472	0.062993	0.932946	-0.272753	0.249503	0.483026	-0.0392307	UNCHANGED	UNCHANGED	UNCHANGED	UNCHANGED
A0A445B4I2	6	794.636	EMC1_C domain-containing protein	ER membrane protein complex subunit 1		16092	54175.7	63879.3	50939	63305.7	62067.7	14081.5	36614.3	52571.3	46298.3	49250.3	50721.3	44715.7	58770.8	34422.4	48756.7	0.404765	0.271256	0.0729272	0.605086	0.394319	0.502252	-0.269499	-0.377433	UNCHANGED	UNCHANGED	UNCHANGED	UNCHANGED
A0A445BG52	4	706.322	Uncharacterized protein	tripeptidyl-peptidase 2 isoform X1	P:protein metabolic process;	30464	47310	67854.7	27312.7	48664.7	34945.5	22645.3	31448.7	63749	30120.3	23286	28853	48542.9	36974.3	39281	27419.8	0.406623	0.402196	0.220698	0.605021	-0.392738	-0.518615	-0.431305	-0.305428	UNCHANGED	UNCHANGED	UNCHANGED	UNCHANGED
A0A445EQU9	3	480.56	Uncharacterized protein	Programmed cell death protein 4	P:nucleobase-containing compound metabolic process	20779.5	35466.5	36566	33970.3	43431.5	32446	14009.7	25129.5	28281.5	34963	29112.3	31536	30937.3	36615.9	22473.6	31870.4	0.407403	0.113361	0.283324	0.273942	0.243123	0.503991	-0.200253	-0.46112	UNCHANGED	UNCHANGED	UNCHANGED	UNCHANGED
A0A444WYK0	10	2689.04	Uncharacterized protein	Polyphenol oxidase A1, chloroplastic	P:reproduction; P:cell cycle; P:metabolic process; P:cellular component organization; P:regulation of molecular function	435168	402427	570694	415844	471457	346872	207848	398171	199205	419439	443976	457690	469430	411391	268408	440368	0.408102	0.0594227	0.485309	0.0723308	-0.1904	0.714283	0.0982007	-0.806482	UNCHANGED	UNCHANGED	UNCHANGED	UNCHANGED
A0A445BPJ4	2	601.232	Uncharacterized protein	vacuolar protein sorting-associated protein 26A	P:transport;	428803	566059	839706	489870	537200	468980	553359	979480	717961	596328	591329	649711	611522	498683	750267	612456	0.408934	0.333706	0.0144115	0.467846	-0.294282	-0.292797	0.296482	0.294998	UNCHANGED	UNCHANGED	UNCHANGED	UNCHANGED
A0A444XNG6	2	389.341	ATP-grasp domain-containing protein	phosphoribosylaminoimidazole carboxylase, chloroplastic	P:nucleobase-containing compound metabolic process; P:biosynthetic process;	16362	32373	37701	15242	23454	27435	13079	17198.5	17210	16519.5	24102.5	17614	28812	22043.7	15829.2	19412	0.409156	0.26065	0.57357	0.118842	-0.386306	0.294363	-0.183415	-0.864085	UNCHANGED	UNCHANGED	UNCHANGED	UNCHANGED
A0A445CG60	6	2704.41	PEROXIDASE_4 domain-containing protein	thylakoid lumenal 29 kDa protein, chloroplastic isoform X1	P:response to stress; P:catabolic process; P:cellular process; P:response to chemical;	128164	107147	115083	167469	93550.3	154512	154640	170152	155625	149379	150007	142810	116798	138510	160139	147399	0.409595	0.0821202	0.717738	0.00542033	0.245981	-0.1196	0.089732	0.455313	UNCHANGED	UNCHANGED	UNCHANGED	UNCHANGED
A0A445D987	5	3085.18	Proteasome subunit beta	proteasome subunit beta type-4	P:catabolic process; P:cellular process; P:protein metabolic process; P:response to chemical;	50902.7	34967.6	35097.7	36881.3	36732.1	32219.1	66330.3	46265.9	46920	52302.3	49674.6	47780	40322.7	35277.5	53172.1	49919	0.411422	0.653218	0.00190474	0.202744	-0.192842	-0.0910796	0.500839	0.399077	UNCHANGED	UNCHANGED	UNCHANGED	UNCHANGED
A0A445AAR7	12	4756.84	Uncharacterized protein	selenium-binding protein 2	P:cellular protein modification process	112860	126881	94813	108079	100637	99500.9	128345	118480	114365	111474	100185	109953	111518	102739	120397	107204	0.415019	0.0727439	0.371841	0.431743	-0.118291	-0.167441	0.0613751	0.110525	UNCHANGED	UNCHANGED	UNCHANGED	UNCHANGED
A0A444X9N8	3	1707.76	Cytochrome c domain-containing protein	cytochrome c1-2, heme protein, mitochondrial	P:generation of precursor metabolites and energy; P:nucleobase-containing compound metabolic process; P:transport; P:biosynthetic process;	24812	28444	16021	30333.1	26952.7	23402.1	15854.8	9213.22	23279.1	29290.5	20571.2	31899.6	23092.3	26895.9	16115.7	27253.8	0.415922	0.104114	0.932463	0.272445	0.219975	0.757985	0.0190665	-0.518944	UNCHANGED	UNCHANGED	UNCHANGED	UNCHANGED
A0A445A8L0	3	2377.52	Uncharacterized protein	U-box domain-containing protein 44		155114	180884	118579	173377	167885	163004	148839	190515	190761	160468	183702	264863	151526	168089	176705	203011	0.417108	0.489146	0.333605	0.331812	0.149662	0.200218	0.272336	0.22178	UNCHANGED	UNCHANGED	UNCHANGED	UNCHANGED
A0A445B5Z3	3	3141	Chalcone-flavonone isomerase family protein	probable chalcone--flavonone isomerase 3		202154	247062	122624	168474	144679	158259	193470	133441	131315	179949	173577	188358	190613	157138	152742	180628	0.417111	0.251452	0.0443197	0.415141	-0.278617	0.241923	0.200993	-0.319547	UNCHANGED	UNCHANGED	UNCHANGED	UNCHANGED
A0A444ZY78	14	1109.84	Ribonuclease	ribonuclease TUDOR 1	P:catabolic process;	68812.7	104816	178176	88112.3	89231.3	87691.7	47096.9	81986.7	61145	112374	81481.2	71079.6	117268	88345.1	63409.5	88311.5	0.419602	0.194945	0.997968	0.185628	-0.408589	0.477901	-0.000549163	-0.887039	UNCHANGED	UNCHANGED	UNCHANGED	UNCHANGED
A0A444Y0B6	9	11314.8	Uncharacterized protein	ubiquitin-NEDD8-like protein RUB2	P:cellular protein modification process; P:catabolic process;	710376	901195	1.50529e+06	930639	902293	568849	574061	724637	762987	924977	917323	875305	1.03895e+06	800593	687229	905868	0.421275	0.0215227	0.419771	0.226664	-0.37599	0.398511	0.178231	-0.59627	UNCHANGED	UNCHANGED	UNCHANGED	UNCHANGED
A0A445C9D4	11	3509.26	14_3_3 domain-containing protein	14-3-3-like protein	P:metabolic process	78155	109771	86727.4	144149	73701.3	117385	104787	80878.8	194441	211183	132934	213679	91551.2	111745	126702	185932	0.422025	0.245514	0.0913644	0.382129	0.287559	0.553333	0.734564	0.46879	UNCHANGED	UNCHANGED	UNCHANGED	UNCHANGED
A0A444ZWU7	5	1234.18	PKS_ER domain-containing protein	probable cinnamyl alcohol dehydrogenase 1	P:metabolic process	56893.3	38124	41496	31295.7	41395.7	45061.3	33912.3	39833.7	39730.3	52982.3	74558.3	48610.3	45504.4	39250.9	37825.4	58717	0.427779	0.0646289	0.096966	0.276505	-0.213282	0.634421	0.581053	-0.26665	UNCHANGED	UNCHANGED	UNCHANGED	UNCHANGED
A0A445ED48	18	17138.2	ATP synthase subunit alpha	ATPase subunit 1	P:nucleobase-containing compound metabolic process; P:transport; P:biosynthetic process;	578857	607065	617580	603240	602579	516801	521526	560661	519188	582722	612077	584352	601167	574207	533792	593050	0.432782	0.022854	0.566995	0.0191266	-0.0661963	0.151878	0.0465847	-0.171489	UNCHANGED	UNCHANGED	UNCHANGED	UNCHANGED
A0A445CP77	5	1702.59	Peptidyl-prolyl cis-trans isomerase	peptidyl-prolyl cis-trans isomerase CYP19-3	P:cellular protein modification process	459890	237122	270667	199979	387943	94090.6	210807	452072	348184	316713	140637	164438	322560	227338	337021	207263	0.437105	0.218666	0.853715	0.890313	-0.504729	-0.701377	-0.133375	0.0632733	UNCHANGED	UNCHANGED	UNCHANGED	UNCHANGED
A0A445DYK2	8	8766.31	Malate dehydrogenase	malate dehydrogenase, mitochondrial	P:carbohydrate metabolic process; P:generation of precursor metabolites and energy;	4245.18	5580.96	4765.84	5298.76	5337.56	4994.03	4679.59	5450.97	3751.45	3809.22	3165.18	3376.77	4863.99	5210.12	4627.34	3450.39	0.43947	0.0891127	0.00128949	0.724801	0.0991747	-0.423422	-0.594556	-0.0719594	UNCHANGED	UNCHANGED	UNCHANGED	UNCHANGED
A0A445BEK8	3	294.568	Uncharacterized protein	glutamine--tRNA ligase	P:nucleobase-containing compound metabolic process; P:translation;	17623	48133.3	52972	45672.3	45244	57933.5	9856	22033	26253.5	19127	51129	48456	39576.1	49616.6	19380.8	39570.7	0.443529	0.150398	0.415203	0.170652	0.326193	1.0298	-0.326392	-1.03	UNCHANGED	UNCHANGED	UNCHANGED	UNCHANGED
A0A444ZV91	8	1308.21	PHB domain-containing protein	hypersensitive-induced response protein 1		279223	219216	198000	197847	245635	169367	215245	304311	349318	287659	290657	223513	232146	204283	289625	267276	0.445569	0.64601	0.113787	0.282247	-0.184464	-0.115854	0.387761	0.319151	UNCHANGED	UNCHANGED	UNCHANGED	UNCHANGED
A0A444XC07	11	1991.08	Phospholipase D	phospholipase D alpha 1	P:lipid metabolic process; P:catabolic process; P:cellular process;	11322.5	21006.3	32519.7	27356.6	25302.6	27848	2527.09	26004.4	26300.8	55279.2	21133.6	22941.7	21616.2	26835.7	18277.4	33118.1	0.44563	0.33663	0.602282	0.754732	0.312045	0.857559	0.303467	-0.242047	UNCHANGED	UNCHANGED	UNCHANGED	UNCHANGED
A0A445EPG6	5	3134.57	Aldedh domain-containing protein	betaine aldehyde dehydrogenase 1, chloroplastic	P:metabolic process	111117	96917.8	269973	114216	123107	99393.8	101234	113964	114912	117342	127201	96212.2	159336	112239	110037	113585	0.446921	0.744236	0.912164	0.425689	-0.505502	0.045791	0.017202	-0.534091	UNCHANGED	UNCHANGED	UNCHANGED	UNCHANGED
A0A445DU44	6	1675.82	Uncharacterized protein	V-type proton ATPase subunit E	P:transport;	47563.3	92872.3	113573	115268	97334	93506	28430.7	21559.5	70608.7	90568.3	78458.3	80203.7	84669.6	102036	40199.6	83076.8	0.446946	0.0532575	0.0695056	0.14741	0.269165	1.04726	-0.296563	-1.07466	UNCHANGED	UNCHANGED	UNCHANGED	UNCHANGED
A0A444ZS36	7	2448.62	Lipoxygenase	lipoxygenase 6, chloroplastic	P:lipid metabolic process; P:biosynthetic process; P:cellular process	18516.9	27386.7	16831.6	29137.7	23794.4	20309.7	20575.3	21222.1	26572.6	20619.7	18530.6	21263.2	20911.7	24413.9	22790	20137.8	0.447286	0.269686	0.187962	0.645796	0.223389	-0.178493	-0.277795	0.124088	UNCHANGED	UNCHANGED	UNCHANGED	UNCHANGED
A0A445D0T6	9	5865.43	Proteasome subunit beta	proteasome subunit beta type-3-A	P:catabolic process; P:cellular process; P:protein metabolic process;	135262	145402	111382	153756	147178	124801	129588	93234.3	126860	142007	147718	149659	130682	141911	116561	146461	0.447924	0.0660684	0.641888	0.412117	0.118931	0.329436	0.04553	-0.164975	UNCHANGED	UNCHANGED	UNCHANGED	UNCHANGED
A0A445D9F8	9	25236.6	Uncharacterized protein	photosystem II protein D2	P:generation of precursor metabolites and energy; P:cellular protein modification process; P:photosynthesis;	445482	460165	443472	417916	472837	404091	497636	524866	562521	453530	467001	465315	449706	431615	528341	461949	0.450246	0.0262185	0.229627	0.0157893	-0.0592378	-0.193736	0.0979884	0.232487	UNCHANGED	UNCHANGED	UNCHANGED	UNCHANGED
A0A445DGI7	3	994.766	NAD(P)-bd_dom domain-containing protein	NAD(P)-binding Rossmann-fold superfamily protein isoform 1		163556	151413	101251	129779	122655	115106	167146	176373	168115	149638	155002	136010	138740	122514	170545	146883	0.452867	0.0205302	0.0260588	0.174594	-0.179444	-0.215481	0.261727	0.297765	UNCHANGED	UNCHANGED	UNCHANGED	UNCHANGED
A0A445CNH5	21	20325.1	Uncharacterized protein	luminal-binding protein 5	P:response to stress; P:signal transduction; P:catabolic process; P:response to abiotic stimulus; P:protein metabolic process; P:response to chemical;	60693.6	108610	177298	68423.5	78784.9	109615	32004.3	100109	103292	114156	93230.4	131419	115534	85607.7	78468.4	112935	0.452891	0.25157	0.174677	0.417686	-0.432501	0.525308	0.39968	-0.558129	UNCHANGED	UNCHANGED	UNCHANGED	UNCHANGED
A0A445A6E4	18	3238.26	Uncharacterized protein	patellin-3		211597	178935	227842	188872	213371	167581	225906	258804	248577	196641	198980	209014	206125	189942	244429	201545	0.454123	0.0147372	0.446645	0.0919625	-0.11796	-0.278316	0.0855447	0.2459	UNCHANGED	UNCHANGED	UNCHANGED	UNCHANGED
A0A445EKG3	10	3259.69	Uncharacterized protein	NAD-dependent malic enzyme 59 kDa isoform, mitochondrial	P:metabolic process; P:cellular process	19731.9	19904.2	14717.4	15293.2	17222.6	17322	36105.3	13239.6	16582.5	17327	21027.3	21407.8	18117.8	16612.6	21975.8	19920.7	0.455759	0.79084	0.086038	0.626513	-0.12513	-0.141645	0.261992	0.278507	UNCHANGED	UNCHANGED	UNCHANGED	UNCHANGED
A0A445CYD6	2	1717.11	Chlorophyll a-b binding protein, chloroplastic	chlorophyll a-b binding protein 6A, chloroplastic	P:generation of precursor metabolites and energy; P:cellular protein modification process; P:response to stress; P:response to light stimulus; P:photosynthesis;	121406	143642	176370	171607	104667	92688	160360	123432	274188	89779	106100	132252	147139	122987	185993	109377	0.455901	0.17858	0.646542	0.464467	-0.258673	-0.76594	-0.1692	0.338067	UNCHANGED	UNCHANGED	UNCHANGED	UNCHANGED
A0A445CRD7	44	26135.8	Uncharacterized protein	cell division cycle protein 48 homolog	P:transport; P:response to stress; P:cell cycle; P:catabolic process; P:cellular component organization; P:protein metabolic process; P:response to chemical;	147474	198496	168238	185590	184484	180892	135795	118973	122313	194340	203515	148428	171403	183656	125694	182095	0.456549	0.0338997	0.931651	0.0434612	0.0996138	0.534774	-0.0123148	-0.447475	UNCHANGED	UNCHANGED	UNCHANGED	UNCHANGED
A0A445B8E4	2	1096.92	Lipoyl-binding domain-containing protein	Biotin carboxyl carrier protein of acetyl-CoA carboxylase		52137	70403	48701	73325	31808	25646.5	70028	34329.5	57003	57758	34815	43386.5	57080.3	43593.2	53786.8	45319.8	0.457484	0.531993	0.921218	0.803907	-0.388892	-0.24711	0.0560405	-0.0857407	UNCHANGED	UNCHANGED	UNCHANGED	UNCHANGED
A0A445A8G9	4	349.879	Coatomer subunit alpha	coatomer subunit alpha-2	P:transport;	6213.73	30322.6	18902.6	26695.7	19203.3	27932.1	6095.64	16859.9	25792.8	18635.6	27880.5	23699.7	18479.6	24610.4	16249.5	23405.3	0.458338	0.318812	0.768086	0.816387	0.413331	0.526443	-0.0724329	-0.185545	UNCHANGED	UNCHANGED	UNCHANGED	UNCHANGED
A0A444WNH7	2	376.586	Eukaryotic translation initiation factor 3 subunit H	eukaryotic translation initiation factor 3 subunit H	P:response to endogenous stimulus; P:cellular component organization; P:response to chemical;	22025	13860	9652	11003.5	14624.5	10415	14975	10944	10150	13248	8590	13145.5	15179	12014.3	12023	11661.2	0.458687	0.87408	0.869869	0.466664	-0.33732	-0.0440848	-0.0430445	-0.33628	UNCHANGED	UNCHANGED	UNCHANGED	UNCHANGED
A0A445CNY6	17	4489.94	Epimerase domain-containing protein	GDP-mannose 3,5-epimerase 2		191572	148059	95445	147962	95214.3	114681	163735	225361	105686	159732	185809	177252	145025	119286	164928	174264	0.463316	0.804972	0.0330518	0.676794	-0.281881	0.0794449	0.546853	0.185526	UNCHANGED	UNCHANGED	UNCHANGED	UNCHANGED
A0A445CJK2	15	11513.8	Uncharacterized protein	L-ascorbate oxidase homolog	P:transport; P:metabolic process;	340861	287746	214217	275216	252892	216891	216112	308384	263665	195060	192885	250730	280942	248333	262720	212892	0.465434	0.202022	0.235953	0.708461	-0.177994	-0.303407	-0.222155	-0.0967425	UNCHANGED	UNCHANGED	UNCHANGED	UNCHANGED
A0A445A4L0	4	1674.32	Uncharacterized protein	60S ribosomal protein L17-2	P:translation;	52135	112482	174224	112823	144119	178068	27394	42292.5	67695.3	186785	58918.7	177345	112947	145003	45793.9	141016	0.467434	0.0900674	0.934024	0.145002	0.360436	1.62263	-0.0402216	-1.30242	UNCHANGED	UNCHANGED	UNCHANGED	UNCHANGED
A0A445CIH8	23	2063.26	Uncharacterized protein	heat shock 70 kDa protein 15	P:metabolic process;	240995	244005	227620	258345	264704	222265	194487	239831	229782	249712	242111	234724	237540	248438	221367	242182	0.483908	0.222207	0.676097	0.331336	0.0647156	0.129654	-0.0367915	-0.10173	UNCHANGED	UNCHANGED	UNCHANGED	UNCHANGED
A0A445DCC8	2	921.956	Uncharacterized protein	subtilisin-like protease Glyma18g48580	P:protein metabolic process;	178485	133881	100322	125547	138881	83158	138626	155890	142213	235456	173107	122787	137563	115862	145577	177117	0.48437	0.39342	0.170078	0.747609	-0.247682	0.282924	0.612295	0.0816892	UNCHANGED	UNCHANGED	UNCHANGED	UNCHANGED
A0A444WPH6	6	1395.17	Ferredoxin--NADP reductase, chloroplastic	ferredoxin--NADP reductase, root isozyme, chloroplastic isoform X2	P:metabolic process;	96830.3	83919.3	69034.7	83048	70610.7	75926	77085.7	65597	71391.3	95675	104039	85275.7	83261.4	76528.2	71358	94996.4	0.486925	0.0205349	0.0471008	0.242546	-0.121657	0.412798	0.311882	-0.222573	UNCHANGED	UNCHANGED	UNCHANGED	UNCHANGED
A0A445A5F9	6	4199.09	Uncharacterized protein	sulfite reductase [ferredoxin], chloroplastic	P:nucleobase-containing compound metabolic process; P:biosynthetic process; P:cellular component organization;	53366	98333.7	84097.7	91834	81648.7	93865.7	38685	69186.7	88883.3	99170.3	103103	125569	78599.1	89116.1	65585	109281	0.488365	0.0595845	0.0897938	0.54556	0.181173	0.736599	0.294279	-0.261147	UNCHANGED	UNCHANGED	UNCHANGED	UNCHANGED
A0A445BVT7	4	611.077	Bac_surface_Ag domain-containing protein	protein TOC75-3, chloroplastic	P:nucleobase-containing compound metabolic process; P:transport; P:biosynthetic process; P:embryo development; P:cellular component organization;	25997.6	20009.6	36452.8	31586.8	31536.5	30244.5	9644.08	28725.1	29859.5	18575.4	28778.1	15789.9	27486.7	31122.6	22742.9	21047.8	0.493024	0.835581	0.0642332	0.590854	0.17923	-0.111747	-0.564294	-0.273317	UNCHANGED	UNCHANGED	UNCHANGED	UNCHANGED
A0A445CE47	11	3937.33	Epimerase domain-containing protein	GDP-mannose 3,5-epimerase 2		242527	286898	95637.7	260374	288803	214945	194654	249700	197107	178297	188751	218751	208354	254707	213820	195266	0.494064	0.440033	0.0737551	0.932374	0.289803	-0.130956	-0.383397	0.0373613	UNCHANGED	UNCHANGED	UNCHANGED	UNCHANGED
A0A445B7Y7	2	591.813	Phosphoinositide phospholipase C	phosphoinositide phospholipase C 2 isoform X2	P:lipid metabolic process; P:signal transduction; P:catabolic process	36802	41009	18581	42412	42812	29520.5	36924	53055	53237	68227	41405	52978	32130.7	38248.2	47738.7	54203.3	0.49465	0.532073	0.14782	0.149135	0.25144	0.183223	0.502991	0.571207	UNCHANGED	UNCHANGED	UNCHANGED	UNCHANGED
A0A445BDU9	10	466.096	CPSF_A domain-containing protein	spliceosome-associated protein 130 A	P:nucleobase-containing compound metabolic process;	13474.3	49683.3	63019.7	51761.3	57139	50753	15467.7	38191	46328.3	47628.7	50961.7	59634.3	42059.1	53217.8	33329	52741.6	0.496472	0.121529	0.912929	0.64307	0.33949	0.662162	-0.0129681	-0.33564	UNCHANGED	UNCHANGED	UNCHANGED	UNCHANGED
A0A444WXE2	11	2658.42	NADH-cytochrome b5 reductase	NADH-cytochrome b5 reductase-like protein	P:metabolic process;	273395	290522	377064	291220	295160	282231	255209	214398	234153	282664	295852	298007	313660	289537	234587	292174	0.496812	0.0106043	0.689416	0.0817239	-0.115456	0.316709	0.0130823	-0.419082	UNCHANGED	UNCHANGED	UNCHANGED	UNCHANGED
A0A445B3Q5	2	2261.14	RRM domain-containing protein	Glycine-rich RNA-binding protein 3, mitochondrial		154692	114762	109382	142419	132600	136452	120939	116427	98805.5	157872	160645	152930	126279	137157	112057	157149	0.496912	0.00318161	0.00535545	0.419116	0.119212	0.487898	0.196305	-0.172382	UNCHANGED	UNCHANGED	UNCHANGED	UNCHANGED
A0A445EUJ0	14	1646.51	Glucose-6-phosphate 1-dehydrogenase	glucose-6-phosphate 1-dehydrogenase, cytoplasmic	P:carbohydrate metabolic process; P:generation of precursor metabolites and energy; P:catabolic process; P:protein metabolic process	257784	260056	159846	258850	245717	247451	188435	169071	178758	170236	195643	218539	225895	250673	178755	194806	0.498009	0.345667	0.0184468	0.232133	0.150152	0.124056	-0.363767	-0.337671	UNCHANGED	UNCHANGED	UNCHANGED	UNCHANGED
A0A444ZEL1	2	1305.04	Uncharacterized protein	desiccation-related protein PCC13-62		43156	105690	110462	72830.5	71914	67175.5	51054	29649	133334	62535	48150	140276	86436.2	70640	71345.7	83653.7	0.507982	0.787157	0.673406	0.713871	-0.29115	0.229603	0.243943	-0.276809	UNCHANGED	UNCHANGED	UNCHANGED	UNCHANGED
A0A444XXG6	5	1448.31	ADK_lid domain-containing protein	adenylate kinase 4	P:nucleobase-containing compound metabolic process; P:biosynthetic process	37579.3	70855.3	34278	67851.3	51715.3	51175.3	21329.7	20197.7	59378.3	44655.7	43477.3	67938	47570.9	56914	33635.2	52023.7	0.508957	0.291326	0.639394	0.467701	0.258705	0.629195	-0.129615	-0.500106	UNCHANGED	UNCHANGED	UNCHANGED	UNCHANGED
A0A444XVM3	14	9069.44	Uncharacterized protein	40S ribosomal protein S15a-1	P:translation;	222697	383693	479141	422026	409282	416757	139293	350006	423070	429044	438864	450611	361844	416022	304123	439506	0.509627	0.187668	0.0316672	0.637253	0.201291	0.531229	0.0792253	-0.250712	UNCHANGED	UNCHANGED	UNCHANGED	UNCHANGED
A0A444WUN5	9	1717.77	DHQ_synthase domain-containing protein	3-dehydroquinate synthase, chloroplastic	P:biosynthetic process; P:cellular process;	80243.7	78876.3	61088	63202	68826	73644.3	88292.7	56558.7	74813.3	63818.7	71481	76573.3	73402.7	68557.4	73221.6	70624.3	0.519446	0.806285	0.687719	0.987734	-0.0985191	-0.0521031	0.042852	-0.00356405	UNCHANGED	UNCHANGED	UNCHANGED	UNCHANGED
A0A444XH79	8	1038.45	Acetyltransferase component of pyruvate dehydrogenase complex	dihydrolipoyllysine-residue acetyltransferase component 2 of pyruvate dehydrogenase complex, mitochondrial isoform X2	P:metabolic process; P:cellular process;	197944	208697	196001	203067	223450	195474	171466	141550	84685.3	206769	227839	186433	200881	207330	132567	207014	0.523595	0.0571238	0.983727	0.0568382	0.0455886	0.643002	-0.00220364	-0.599617	UNCHANGED	UNCHANGED	UNCHANGED	UNCHANGED
A0A445DQB8	17	1679.75	Uncharacterized protein	NADH dehydrogenase [ubiquinone] iron-sulfur protein 1, mitochondrial	P:generation of precursor metabolites and energy;	186059	171235	144811	146406	179527	141182	102331	131532	127335	145500	132116	172216	167368	155705	120399	149944	0.53082	0.118423	0.749273	0.0359954	-0.10421	0.316593	-0.0543936	-0.475197	UNCHANGED	UNCHANGED	UNCHANGED	UNCHANGED
A0A444Y8T0	26	2828.89	RECA_2 domain-containing protein	mitochondrial-processing peptidase subunit alpha	P:DNA metabolic process; P:transport; P:response to stress; P:cellular component organization; P:protein metabolic process;	169270	154594	115109	163548	174871	139906	140281	116870	114757	150073	138835	148287	146324	159442	123969	145731	0.531477	0.0706233	0.275917	0.284917	0.12386	0.233328	-0.129716	-0.239184	UNCHANGED	UNCHANGED	UNCHANGED	UNCHANGED
A0A444ZB47	39	13338	Uncharacterized protein	V-type proton ATPase catalytic subunit A	P:transport; P:multicellular organism development; P:metabolic process; P:cellular component organization;	543626	512344	511102	548703	544454	507957	455604	437018	434792	495894	526530	454133	522357	533705	442471	492186	0.535206	0.0866495	0.167355	0.00309549	0.0310046	0.153618	-0.116839	-0.239453	UNCHANGED	UNCHANGED	UNCHANGED	UNCHANGED
A0A445E446	3	1311.7	Uncharacterized protein	cyanogenic beta-glucosidase isoform X1	P:carbohydrate metabolic process; P:response to stress; P:catabolic process; P:response to abiotic stimulus; P:cellular process; P:secondary metabolic process	140039	126437	168673	137223	122566	146613	148917	172209	175032	159072	162404	156115	145050	135467	165386	159197	0.538929	0.505537	0.030428	0.24527	-0.0986035	-0.0550262	0.232866	0.189289	UNCHANGED	UNCHANGED	UNCHANGED	UNCHANGED
A0A445BCL3	8	15186.2	Peptidyl-prolyl cis-trans isomerase	peptidyl-prolyl cis-trans isomerase	P:cellular protein modification process;	530816	522625	485607	529525	511645	528128	555405	586856	540418	472497	458524	469596	513016	523099	560893	466872	0.539448	0.00279168	0.00141137	0.0701433	0.0280804	-0.264698	-0.164056	0.128722	UNCHANGED	UNCHANGED	UNCHANGED	UNCHANGED
A0A445B669	2	1250.83	NAC-A/B domain-containing protein	nascent polypeptide-associated complex subunit alpha-like protein 2		104320	80548	14883	107562	52602	103934	208045	117662	93150.5	122614	116368	125682	66583.7	88032.7	139619	121555	0.540563	0.633401	0.135326	0.172266	0.402871	-0.199892	0.465494	1.06826	UNCHANGED	UNCHANGED	UNCHANGED	UNCHANGED
A0A445AV59	2	543.032	Uncharacterized protein	ADP-ribosylation factor 1	P:transport;	29010	42774.5	33377	35436	31852.5	28907.5	31043.5	32304.5	45745	38804	38953	42943	35053.8	32065.3	36364.3	40233.3	0.541082	0.473587	0.0245656	0.843296	-0.128558	0.145867	0.327377	0.0529519	UNCHANGED	UNCHANGED	UNCHANGED	UNCHANGED
A0A445C2U4	16	2556.41	HATPase_c domain-containing protein	heat shock protein 90-6, mitochondrial	P:cellular process;	57649.2	73009.8	92668.9	81472.6	80982.3	81122.1	66759.7	70115.7	56498.3	76482.8	81739.3	69693.8	74442.6	81192.3	64457.9	75972	0.541893	0.0990255	0.208998	0.412695	0.125214	0.23711	-0.095876	-0.207772	UNCHANGED	UNCHANGED	UNCHANGED	UNCHANGED
A0A444XPX7	21	38141.2	Uncharacterized protein	malate dehydrogenase	P:carbohydrate metabolic process; P:generation of precursor metabolites and energy	254975	246515	245932	266136	236991	263674	214729	205974	191730	256110	272980	270694	249141	255600	204144	266595	0.544968	0.00185555	0.363219	0.00353675	0.0369305	0.385059	0.0607572	-0.287371	UNCHANGED	UNCHANGED	UNCHANGED	UNCHANGED
A0A445BKG6	8	928.754	Mitochondrial Rho GTPase	mitochondrial Rho GTPase 1	P:signal transduction; P:cellular component organization;	35008	46803.7	60433.7	50392.3	55252	51279	30059.7	44053.7	41365	47400	45475	44247	47415.1	52307.8	38492.8	45707.3	0.549586	0.175217	0.0197019	0.353384	0.141679	0.247838	-0.1946	-0.300759	UNCHANGED	UNCHANGED	UNCHANGED	UNCHANGED
A0A445A2Y9	2	1217.78	Uncharacterized protein	3-hydroxyisobutyryl-CoA hydrolase-like protein 3, mitochondrial isoform X1		52755.5	21410	53262.5	27619	48507	26359	53699	49913.5	43815	47459	44711.5	47283.5	42476	34161.7	49142.5	46484.7	0.549887	0.427536	0.163802	0.574538	-0.31427	-0.0802163	0.444377	0.210323	UNCHANGED	UNCHANGED	UNCHANGED	UNCHANGED
A0A445BK83	10	21453.8	Uncharacterized protein	60S ribosomal protein L11 isoform X2	P:translation; P:cellular component organization;	242113	474440	587524	506461	491157	505095	115266	289653	426596	496217	517509	526573	434693	500904	277172	513433	0.55086	0.0594493	0.288281	0.310725	0.20454	0.889396	0.0356412	-0.649215	UNCHANGED	UNCHANGED	UNCHANGED	UNCHANGED
A0A444XVQ8	8	6076.63	Proteasome endopeptidase complex	proteasome subunit alpha type-5	P:catabolic process; P:cellular process; P:protein metabolic process;	128051	201429	159873	186427	163264	183028	126343	78738	154470	151435	126575	173745	163118	177573	119850	150585	0.554505	0.302038	0.154964	0.230977	0.1225	0.329346	-0.237831	-0.444677	UNCHANGED	UNCHANGED	UNCHANGED	UNCHANGED
A0A445CNV7	25	10537	Uncharacterized protein	putative aldo-keto reductase 1	P:metabolic process	338549	212049	239860	256069	237435	220877	369997	318225	245638	262589	262314	229537	263486	238127	311287	251480	0.557756	0.187822	0.422437	0.415422	-0.145994	-0.307802	0.0787114	0.24052	UNCHANGED	UNCHANGED	UNCHANGED	UNCHANGED
A0A445CCH7	27	4981.47	HATPase_c domain-containing protein	endoplasmin homolog	P:cellular process;	66241.3	226590	382578	291312	290378	268521	46070	130332	250516	270523	293591	364087	225137	283404	142306	309400	0.559385	0.0636484	0.422322	0.489245	0.332058	1.12048	0.126615	-0.661807	UNCHANGED	UNCHANGED	UNCHANGED	UNCHANGED
A0A444ZVW6	4	1104.62	Uncharacterized protein	glutathione S-transferase DHAR3, chloroplastic	P:cellular protein modification process; P:response to chemical;	87544	75178.3	60874	95214.7	71154.7	77339	78076.7	52182	81398	39136.7	81782	105408	74532.1	81236.1	70552.2	75442.3	0.55986	0.831064	0.793342	0.757331	0.124259	0.0966828	-0.106747	-0.0791706	UNCHANGED	UNCHANGED	UNCHANGED	UNCHANGED
A0A444ZAX5	30	5204.38	Sucrose synthase	sucrose synthase	P:carbohydrate metabolic process; P:cellular process	112823	276060	423178	213865	234446	191462	113639	245573	299274	241576	248603	259464	270687	213258	219495	249881	0.560131	0.612518	0.052923	0.652112	-0.344029	0.187051	0.228642	-0.302438	UNCHANGED	UNCHANGED	UNCHANGED	UNCHANGED
A0A445DJV5	6	3191.71	PAP_fibrillin domain-containing protein	plastid-lipid-associated protein, chloroplastic		129308	223885	211790	193391	256734	185630	161246	101437	163220	152841	149900	133200	188328	211918	141968	145314	0.561286	0.882122	0.0461967	0.266969	0.170262	0.0336029	-0.544338	-0.407679	UNCHANGED	UNCHANGED	UNCHANGED	UNCHANGED
A0A445BMH5	13	2789.79	Lipoxygenase	linoleate 9S-lipoxygenase 1	P:lipid metabolic process; P:biosynthetic process; P:cellular process	150790	249765	348951	296605	324211	245532	150567	198261	201945	250688	229970	269519	249835	288782	183591	250059	0.561995	0.0297655	0.206657	0.328301	0.209005	0.445771	-0.207715	-0.444481	UNCHANGED	UNCHANGED	UNCHANGED	UNCHANGED
A0A445BB06	4	3563.8	Uncharacterized protein	multiple organellar RNA editing factor 9, chloroplastic	P:nucleobase-containing compound metabolic process;	15612	20969.5	14549	14623.7	21287	6088.5	26702.7	24220.5	4720	13112.7	14774	8908	17043.5	13999.7	18547.7	12264.9	0.562507	0.430163	0.732487	0.845336	-0.283823	-0.596708	-0.190864	0.12202	UNCHANGED	UNCHANGED	UNCHANGED	UNCHANGED
A0A444YUK5	5	2737.16	Peroxidase	peroxidase 16	P:response to stress; P:catabolic process; P:cellular process; P:response to chemical;	390031	370951	174640	415494	315547	345944	272545	310938	302198	391110	419847	372556	311874	358995	295227	394504	0.563531	0.00528145	0.337582	0.823246	0.203002	0.418216	0.136076	-0.0791381	UNCHANGED	UNCHANGED	UNCHANGED	UNCHANGED
A0A445CWF5	25	6235.12	Aspartate aminotransferase	aspartate aminotransferase P2, mitochondrial	P:biosynthetic process; P:cellular process;	227386	242123	266158	257324	262654	240414	208656	155592	207601	176505	198085	197452	245222	253464	190616	190681	0.564498	0.997446	0.00300098	0.0588105	0.0476899	0.000486977	-0.410622	-0.363419	UNCHANGED	UNCHANGED	UNCHANGED	UNCHANGED
A0A445B155	16	2598.05	Uncharacterized protein	T-complex protein 1 subunit theta	P:cellular process;	88204	93937.7	64634	80571	77957.3	70528.7	98318.7	106380	79846.7	86798.3	80844	102463	82258.6	76352.3	94848.6	90035	0.566151	0.660393	0.126797	0.350426	-0.107493	-0.0751399	0.237814	0.20546	UNCHANGED	UNCHANGED	UNCHANGED	UNCHANGED
A0A445AA42	28	9873.17	Uncharacterized protein	ruBisCO large subunit-binding protein subunit alpha	P:transport; P:cellular component organization;	132738	166283	199786	193038	132344	117638	173135	128382	142637	128084	162549	169639	166269	147673	148051	153424	0.570371	0.78493	0.838251	0.48022	-0.171112	0.0514266	0.0551161	-0.167422	UNCHANGED	UNCHANGED	UNCHANGED	UNCHANGED
A0A445DMI3	11	2480.54	PKS_KS domain-containing protein	3-oxoacyl-[acyl-carrier-protein] synthase I, chloroplastic	P:reproduction; P:lipid metabolic process; P:biosynthetic process; P:embryo development; P:post-embryonic development; P:cellular component organization;	133025	99085.7	77136.3	99719	92023	86753.7	150636	172841	128863	132220	127803	112491	103082	92831.9	150780	124171	0.572256	0.130803	0.0113671	0.081813	-0.151103	-0.280116	0.419637	0.54865	UNCHANGED	UNCHANGED	UNCHANGED	UNCHANGED
A0A445E4Q7	4	2123.94	Uncharacterized protein	isovaleryl-CoA dehydrogenase, mitochondrial	P:catabolic process; P:cellular process;	59829.3	61669	53096.7	67231	75297	47829	62691	45842.7	55183.7	48246	75946.7	61820.3	58198.3	63452.3	54572.4	62004.3	0.572443	0.471854	0.905214	0.547561	0.124695	0.184196	-0.0333042	-0.0928052	UNCHANGED	UNCHANGED	UNCHANGED	UNCHANGED
A0A444XS90	9	14530	Peptidyl-prolyl cis-trans isomerase	peptidyl-prolyl cis-trans isomerase	P:cellular protein modification process;	705894	699995	627672	701068	535803	689951	469414	562864	558082	731888	725811	750392	677854	642274	530120	736030	0.578778	0.00275423	0.156595	0.0200234	-0.0777855	0.473447	0.196577	-0.354656	UNCHANGED	UNCHANGED	UNCHANGED	UNCHANGED
A0A444Y8N8	7	1288.92	PALP domain-containing protein	threonine synthase, chloroplastic-like	P:metabolic process; P:cellular process;	65144.3	78863.7	53402	71403.3	57268.7	51713.3	63844.3	57172.7	58743.7	52405	74899	50876.7	65803.3	60128.4	59920.2	59393.6	0.578859	0.950805	0.943415	0.483596	-0.130113	-0.0127366	-0.0177412	-0.135118	UNCHANGED	UNCHANGED	UNCHANGED	UNCHANGED
A0A444XW20	12	3183.9	Aldo_ket_red domain-containing protein	perakine reductase-like	P:metabolic process	219063	208740	86831.4	205086	237334	159279	246717	191528	212372	136342	141699	168738	171545	200566	216872	148926	0.578984	0.0230838	0.105408	0.374659	0.225494	-0.542245	-0.429478	0.338261	UNCHANGED	UNCHANGED	UNCHANGED	UNCHANGED
A0A444YYZ7	23	3542.78	Uncharacterized protein	nuclear pore complex protein GP210 isoform X2		83409.5	111050	83548	99807.3	99948.3	94805.3	110787	109126	98571.7	91434.9	71216.3	98027.2	92669.3	98187	106161	86892.8	0.586638	0.0970539	0.242427	0.246791	0.0834403	-0.288952	-0.176296	0.196096	UNCHANGED	UNCHANGED	UNCHANGED	UNCHANGED
A0A444ZFB8	3	1318.39	Uncharacterized protein	beta-D-xylosidase 1	P:carbohydrate metabolic process; P:catabolic process; P:cellular process;	7181.5	5936	23682	22611	21168	6493	27803.3	17783.5	29067	22420	14669	15211	12266.5	16757.3	24884.6	17433.3	0.590832	0.162382	0.911668	0.134563	0.450069	-0.513405	0.0570559	1.02053	UNCHANGED	UNCHANGED	UNCHANGED	UNCHANGED
A0A444YRQ2	5	1334.82	eRF1_1 domain-containing protein	eukaryotic peptide chain release factor subunit 1-3	P:cellular component organization;	112475	102605	70615.3	106062	75181.7	76153	134562	112085	101524	105764	101913	92247.3	95231.7	85798.9	116057	99975	0.591555	0.201716	0.263417	0.261784	-0.150482	-0.215193	0.220608	0.285319	UNCHANGED	UNCHANGED	UNCHANGED	UNCHANGED
A0A444ZDI4	8	3943.15	Uncharacterized protein	60S ribosomal protein L9	P:translation;	97123.3	219686	218365	228996	201748	179590	91239.3	172613	224011	244221	214106	255094	178392	203445	162621	237807	0.592026	0.137325	0.142009	0.792502	0.189587	0.548277	0.225156	-0.133534	UNCHANGED	UNCHANGED	UNCHANGED	UNCHANGED
A0A444YX51	10	2037.4	FBPase domain-containing protein	fructose-1,6-bisphosphatase, cytosolic	P:carbohydrate metabolic process; P:biosynthetic process; P:cellular process;	82189	88428.3	104940	104596	104284	83597.3	89773	109184	131091	126139	121283	120215	91852.4	97492.4	110016	122545	0.592608	0.357976	0.0251757	0.256411	0.0859723	0.155603	0.329955	0.260323	UNCHANGED	UNCHANGED	UNCHANGED	UNCHANGED
A0A445E3M6	13	5200.59	Uncharacterized protein	ras-related protein Rab7	P:transport; P:signal transduction;	249774	266622	175120	256942	191360	178613	214842	232883	231707	242505	227631	238560	230505	208972	226478	236232	0.593141	0.254154	0.331158	0.895231	-0.141492	0.0608356	0.176897	-0.0254305	UNCHANGED	UNCHANGED	UNCHANGED	UNCHANGED
A0A444ZYZ5	11	1043.79	HATPase_c domain-containing protein	heat shock protein 83	P:response to stress; P:response to abiotic stimulus; P:cellular process;	132018	136602	41821.6	104360	85155.7	63483	58329.7	55892.6	95006.3	86617.7	85749	89003	103480	84333	69742.9	87123.2	0.593306	0.242621	0.825377	0.368948	-0.295189	0.321011	0.04696	-0.56924	UNCHANGED	UNCHANGED	UNCHANGED	UNCHANGED
A0A444ZKY1	26	6932.52	Proteasome endopeptidase complex	receptor-like protein kinase FERONIA	P:cellular protein modification process; P:catabolic process;	187712	211749	119530	188729	235600	156801	228813	142962	200384	168037	176804	222485	172997	193710	190720	189109	0.594561	0.960239	0.879302	0.660475	0.163149	-0.012239	-0.0346802	0.140708	UNCHANGED	UNCHANGED	UNCHANGED	UNCHANGED
A0A445E2F5	12	3027.14	Uncharacterized protein	cinnamoyl-CoA reductase		276468	279491	249100	308228	223901	329881	216047	293104	245229	379337	361603	286299	268353	287336	251460	342413	0.603743	0.0663846	0.270512	0.527659	0.0986078	0.445409	0.252996	-0.093805	UNCHANGED	UNCHANGED	UNCHANGED	UNCHANGED
A0A444XWG6	14	23390	Glyceraldehyde-3-phosphate dehydrogenase	glyceraldehyde-3-phosphate dehydrogenase, cytosolic	P:carbohydrate metabolic process; P:generation of precursor metabolites and energy; P:nucleobase-containing compound metabolic process; P:catabolic process;	904930	1.1653e+06	810041	915963	899022	886165	1.26848e+06	1.1261e+06	1.21349e+06	1.00844e+06	1.16739e+06	981985	960089	900384	1.20269e+06	1.0526e+06	0.605129	0.102761	0.0600278	0.100429	-0.0926289	-0.192303	0.225351	0.325026	UNCHANGED	UNCHANGED	UNCHANGED	UNCHANGED
A0A444ZB77	12	3154.98	D-3-phosphoglycerate dehydrogenase	D-3-phosphoglycerate dehydrogenase 2, chloroplastic	P:biosynthetic process; P:cellular process;	92757.5	111213	103944	101998	91500.6	103423	73051.9	78092.5	85246.3	75798.5	83334.6	82844.1	102638	98973.9	78796.9	80659.1	0.605847	0.686922	0.0149826	0.0206783	-0.0524512	0.033698	-0.295211	-0.38136	UNCHANGED	UNCHANGED	UNCHANGED	UNCHANGED
A0A445DKC9	2	733.44	X8 domain-containing protein	glucan endo-1,3-beta-glucosidase 4	P:carbohydrate metabolic process; P:cellular protein modification process;	66070.5	42454.5	32374	40417	46864.5	36258	42915	37247	37839	49511.5	53287	43217.5	46966.3	41179.8	39333.7	48672	0.609301	0.0534575	0.153432	0.493737	-0.189689	0.307327	0.241154	-0.255862	UNCHANGED	UNCHANGED	UNCHANGED	UNCHANGED
A0A445EGC3	7	6549.78	40S ribosomal protein SA	40S ribosomal protein SA isoform X1	P:translation; P:cellular component organization;	56790.2	73283.3	69619.1	66034	39365.6	74811	71936	46675.2	74870.4	79332.3	78476	92410.4	66564.2	60070.2	64493.9	83406.2	0.610572	0.132171	0.113947	0.849811	-0.148097	0.370993	0.473505	-0.045584	UNCHANGED	UNCHANGED	UNCHANGED	UNCHANGED
A0A444ZC22	5	1620.54	Uncharacterized protein	ATP phosphoribosyltransferase 2, chloroplastic	P:biosynthetic process; P:cellular process;	30139.7	67305	2155	30291	47566	54813	38249	26503.3	36163.5	25431.7	39302	79420	33199.9	44223.3	33638.6	48051.2	0.614652	0.43392	0.839775	0.982876	0.413629	0.514455	0.119765	0.0189397	UNCHANGED	UNCHANGED	UNCHANGED	UNCHANGED
A0A444YKF2	12	6033.49	Cupin_2 domain-containing protein	DNA damage-repair/toleration protein DRT102	P:carbohydrate metabolic process; P:response to stress; P:response to abiotic stimulus;	339426	301840	248432	342089	283963	314475	244374	293205	288640	251412	287392	336771	296566	313509	275406	291858	0.616867	0.603643	0.509068	0.527933	0.0801536	0.0837065	-0.10324	-0.106793	UNCHANGED	UNCHANGED	UNCHANGED	UNCHANGED
A0A444ZH12	12	2224.14	Uncharacterized protein	eukaryotic initiation factor 4A-3		61734.3	52459.3	29406.3	44143.7	49485	32562.5	50041.7	54944.3	57729	48295.7	48205.7	37294.3	47866.7	42063.7	54238.3	44598.6	0.62052	0.0878366	0.703035	0.553725	-0.186445	-0.282316	0.0844205	0.180291	UNCHANGED	UNCHANGED	UNCHANGED	UNCHANGED
A0A444YRS0	3	2943.99	Xyloglucan endotransglucosylase/hydrolase	probable xyloglucan endotransglucosylase/hydrolase protein B	P:carbohydrate metabolic process; P:cellular component organization;	95572	175124	151917	153062	195808	124299	81453	89694.3	98915	98405	105816	106130	140871	157723	90020.8	103450	0.62054	0.0758961	0.0604622	0.10302	0.163018	0.200604	-0.608462	-0.646048	UNCHANGED	UNCHANGED	UNCHANGED	UNCHANGED
A0A444YDF4	18	7381.42	Uncharacterized protein	receptor kinase-like protein Xa21		44820.1	41437.8	16170.2	26146.9	29277.7	32208	47303.2	44209	43869	38760.1	29240.2	50536.5	34142.7	29210.8	45127.1	39512.3	0.620587	0.420142	0.182932	0.294126	-0.225073	-0.191692	0.435797	0.402415	UNCHANGED	UNCHANGED	UNCHANGED	UNCHANGED
A0A444YJ95	3	881.654	Uncharacterized protein	aspartic proteinase	P:lipid metabolic process; P:catabolic process; P:protein metabolic process;	70398.5	74751.5	85610.4	73322.9	67748.7	80400.5	49563.7	65768.3	63760.9	68892.6	73872.7	58421.6	76920.1	73824	59697.6	67062.3	0.622862	0.342019	0.311532	0.0649083	-0.0592704	0.167828	-0.138589	-0.365687	UNCHANGED	UNCHANGED	UNCHANGED	UNCHANGED
A0A444Y0K0	16	5175.93	Glyceraldehyde-3-phosphate dehydrogenase	glyceraldehyde-3-phosphate dehydrogenase GAPCP1, chloroplastic-like	P:carbohydrate metabolic process; P:generation of precursor metabolites and energy; P:nucleobase-containing compound metabolic process; P:catabolic process;	965455	1.03688e+06	486400	806520	704794	695823	698112	511688	641430	551739	495563	435649	829577	735713	617077	494317	0.62289	0.130012	0.00779231	0.306476	-0.173234	-0.320014	-0.573706	-0.426927	UNCHANGED	UNCHANGED	UNCHANGED	UNCHANGED
A0A444YNX7	16	27214.7	Pyruvate kinase	pyruvate kinase 1, cytosolic isoform X1	P:carbohydrate metabolic process; P:generation of precursor metabolites and energy; P:nucleobase-containing compound metabolic process; P:catabolic process;	194298	217163	173681	179867	179549	202479	187860	166140	183933	213349	216742	214331	195047	187298	179311	214807	0.625382	0.00628626	0.0229122	0.330665	-0.0584858	0.260582	0.197705	-0.121363	UNCHANGED	UNCHANGED	UNCHANGED	UNCHANGED
A0A444WPT5	12	7389.59	Uncharacterized protein	GTP-binding protein SAR1A	P:transport; P:cellular component organization;	347798	212584	135497	235485	191475	166679	354438	333983	348662	238700	268481	268655	231960	197880	345694	258612	0.628935	0.00172373	0.0537871	0.142168	-0.229252	-0.418708	0.386167	0.575623	UNCHANGED	UNCHANGED	UNCHANGED	UNCHANGED
A0A445ETG3	2	461.227	Uncharacterized protein	subtilisin-like protease SBT1.7	P:protein metabolic process	106889	98570	114835	95918.5	76976.5	124741	76938	80867	67497	62531.5	76781.5	59888	106765	99212	75100.7	66400.3	0.633559	0.256482	0.0915884	0.0067406	-0.105848	-0.177635	-0.579324	-0.507537	UNCHANGED	UNCHANGED	UNCHANGED	UNCHANGED
A0A445A3E8	2	5715.06	Profilin	profilin-1	P:cellular component organization;	219961	218204	251816	230293	182668	244200	246084	261484	236555	262463	264466	335026	229994	219054	248041	287318	0.639104	0.190432	0.0871623	0.240874	-0.0703098	0.212071	0.391366	0.108984	UNCHANGED	UNCHANGED	UNCHANGED	UNCHANGED
A0A445CZE9	4	830.325	PKS_ER domain-containing protein	sorbitol dehydrogenase	P:metabolic process	73530.3	60736.7	14350	55541.7	57305.7	63064.3	84874.3	70475.3	63859	57278.3	64400.3	43990.7	49539	58637.2	73069.6	55223.1	0.641987	0.107104	0.621851	0.283658	0.243252	-0.403998	-0.0865446	0.560706	UNCHANGED	UNCHANGED	UNCHANGED	UNCHANGED
A0A445AJ02	3	615.124	Peptidase_S9 domain-containing protein	acylamino-acid-releasing enzyme isoform X1	P:protein metabolic process	57440	87281.7	77066.3	67538.3	75615	64536.3	85598.7	79881.3	70891.7	66662.7	73828.7	62189.7	73929.3	69229.9	78790.6	67560.3	0.642	0.108848	0.742258	0.644123	-0.0947519	-0.221846	-0.0352186	0.0918758	UNCHANGED	UNCHANGED	UNCHANGED	UNCHANGED
A0A445BDU0	3	1998.12	Chalcone-flavonone isomerase family protein	chalcone--flavonone isomerase 2	P:biosynthetic process	96361	74492	103281	56178.7	56010	125484	86680	114321	95281.5	59042.7	72642.5	75841.5	91378	79224.2	98760.8	69175.6	0.648509	0.0375015	0.693334	0.569059	-0.205905	-0.513677	-0.195679	0.112092	UNCHANGED	UNCHANGED	UNCHANGED	UNCHANGED
A0A445DCU5	3	652.878	Uncharacterized protein	probable UDP-arabinopyranose mutase 5	P:nucleobase-containing compound metabolic process;	37795	28202.5	43744.5	29620.3	26935.3	43291.3	26307.5	26228.5	23857.5	34384	31656.7	28923	36580.7	33282.3	25464.5	31654.6	0.65268	0.0249396	0.77423	0.0729635	-0.136325	0.313926	-0.0723434	-0.522594	UNCHANGED	UNCHANGED	UNCHANGED	UNCHANGED
A0A444YCA5	20	6722.92	Isocitrate dehydrogenase [NADP]	isocitrate dehydrogenase [NADP]	P:carbohydrate metabolic process; P:generation of precursor metabolites and energy;	138317	207357	179495	165748	213642	181065	126371	193917	120781	146853	191104	186472	175056	186818	147023	174810	0.656588	0.367538	0.579038	0.415529	0.093816	0.249742	-0.0958503	-0.251776	UNCHANGED	UNCHANGED	UNCHANGED	UNCHANGED
A0A445DGQ0	5	7109.2	Peptidylprolyl isomerase	FK506-binding protein 2	P:cellular protein modification process;	104382	84232	76264	92756.3	97979.3	87013.3	130446	108107	106566	112196	99372.3	146155	88292.8	92583	115040	119241	0.65659	0.805224	0.135979	0.0785167	0.0684519	0.0517489	0.365063	0.381765	UNCHANGED	UNCHANGED	UNCHANGED	UNCHANGED
A0A444XWD3	2	574.235	Uncharacterized protein	cyclase-like protein 2	P:catabolic process; P:cellular process	53100.5	69562.5	82196	65383	62523	64785.5	73619.5	22500	82417.5	81667.5	65285.5	98514.5	68286.3	64230.5	59512.3	81822.5	0.656984	0.347919	0.141822	0.690563	-0.0883383	0.459309	0.349239	-0.198408	UNCHANGED	UNCHANGED	UNCHANGED	UNCHANGED
A0A445EV37	5	2731.11	Uncharacterized protein	CBS domain-containing protein CBSX3, mitochondrial		21207.2	15522.2	13473.7	18444	14876.2	12839.9	21063.5	19444.8	16974.6	16434.8	14670.1	20103.4	16734.4	15386.7	19161	17069.4	0.659237	0.353304	0.50316	0.403643	-0.121135	-0.166758	0.149734	0.195356	UNCHANGED	UNCHANGED	UNCHANGED	UNCHANGED
A0A445AAB1	7	896.767	Uncharacterized protein	4-hydroxy-3-methylbut-2-en-1-yl diphosphate synthase (ferredoxin), chloroplastic	P:lipid metabolic process; P:biosynthetic process; P:cellular process;	28403.3	25650.3	20970.9	24053	28121.7	17445.7	25321.5	15929.1	21096.1	30496.7	33503.5	28604.3	25008.2	23206.8	20782.2	30868.2	0.659574	0.0302783	0.088749	0.290923	-0.107853	0.570769	0.411573	-0.267048	UNCHANGED	UNCHANGED	UNCHANGED	UNCHANGED
A0A444ZZ22	20	2249.78	Uncharacterized protein	puromycin-sensitive aminopeptidase isoform X2	P:catabolic process; P:cellular process; P:protein metabolic process;	144974	174179	231202	217162	170940	202175	166135	204111	280559	237639	237410	261241	183452	196759	216935	245430	0.667505	0.456029	0.0365244	0.471053	0.10103	0.17805	0.318882	0.241863	UNCHANGED	UNCHANGED	UNCHANGED	UNCHANGED
A0A445BKU1	6	1076.57	IBB domain-containing protein	importin subunit alpha-2	P:transport;	80790.4	67194.3	65033.6	62480.4	68311.2	73989	64869.6	56087.3	55913.4	78799.4	73141	80111.2	71006.1	68260.2	58956.8	77350.5	0.668241	0.00727943	0.0828763	0.104187	-0.0568983	0.391754	0.180366	-0.268286	UNCHANGED	UNCHANGED	UNCHANGED	UNCHANGED
A0A445E3G2	15	1733.33	Glucose-1-phosphate adenylyltransferase	glucose-1-phosphate adenylyltransferase large subunit 1	P:carbohydrate metabolic process; P:generation of precursor metabolites and energy; P:biosynthetic process;	96989.3	73591	98796.7	85338.9	100806	65484.6	62815	71147.4	69772.1	84550.6	73665.4	63038.2	89792.3	83876.4	67911.5	73751.4	0.673895	0.434146	0.444947	0.0620453	-0.0983274	0.119015	-0.185595	-0.402937	UNCHANGED	UNCHANGED	UNCHANGED	UNCHANGED
A0A444YMB1	9	2209.99	S-(hydroxymethyl)glutathione dehydrogenase	alcohol dehydrogenase class-3	P:generation of precursor metabolites and energy; P:catabolic process; P:response to chemical;	197252	201467	102183	157628	150860	148198	165083	160663	157195	173968	155421	171654	166968	152229	160980	167014	0.67404	0.390052	0.0844589	0.862781	-0.133326	0.0530873	0.133729	-0.0526842	UNCHANGED	UNCHANGED	UNCHANGED	UNCHANGED
A0A444ZBM0	5	736.482	Protein transport protein SEC23	protein transport protein SEC23	P:transport; P:cellular component organization;	52222.2	71374.6	66084.7	60614.2	82653.7	59300.3	63613.5	75271.4	112224	77691.5	72623.1	94036.7	63227.2	67522.8	83703	81450.4	0.674154	0.894933	0.234404	0.262812	0.0948287	-0.0393568	0.270549	0.404734	UNCHANGED	UNCHANGED	UNCHANGED	UNCHANGED
A0A445DGU8	2	397.169	Peptidylprolyl isomerase	peptidyl-prolyl cis-trans isomerase FKBP62	P:cellular protein modification process;	67226	241911	197350	121813	180034	129274	53729	106188	137518	129790	114410	146395	168829	143707	99145.2	130198	0.674294	0.300401	0.545732	0.294589	-0.232432	0.393095	-0.142421	-0.767948	UNCHANGED	UNCHANGED	UNCHANGED	UNCHANGED
A0A444XDH8	15	3022.25	Lipoxygenase	seed linoleate 9S-lipoxygenase-3	P:lipid metabolic process; P:biosynthetic process; P:cellular process;	190937	278413	402305	379219	305012	279120	170072	247056	256763	303505	299641	308869	290552	321117	224630	304005	0.677505	0.0449763	0.600278	0.381957	0.144303	0.436544	-0.0790041	-0.371245	UNCHANGED	UNCHANGED	UNCHANGED	UNCHANGED
A0A444WZY3	3	782.336	Uncharacterized protein	mediator of RNA polymerase II transcription subunit 36a	P:nucleobase-containing compound metabolic process; P:cellular protein modification process; P:cellular component organization;	115627	108622	90772	118479	163376	70261.3	94787	3957	140075	179771	122354	108523	105007	117372	79606.3	136883	0.680388	0.27726	0.603156	0.566378	0.160602	0.781986	0.221851	-0.399533	UNCHANGED	UNCHANGED	UNCHANGED	UNCHANGED
A0A444YWV3	2	615.237	Uncharacterized protein	gamma carbonic anhydrase 1, mitochondrial	P:metabolic process	133132	116427	76569.5	104111	116412	79122.5	134494	111002	105358	160478	130918	143692	108709	99881.7	116951	145029	0.682419	0.0856263	0.0315329	0.686847	-0.122184	0.310436	0.538053	0.105433	UNCHANGED	UNCHANGED	UNCHANGED	UNCHANGED
A0A444ZDX5	3	528.21	Obg-like ATPase 1	obg-like ATPase 1	P:response to stress; P:response to external stimulus; P:response to biotic stimulus; P:response to abiotic stimulus;	51778.3	90169.7	123930	87581.7	76981	73318	38608.3	80221.7	82322	83206.3	85142	83399.7	88625.8	79293.6	67050.7	83916	0.683592	0.302053	0.344975	0.440825	-0.160524	0.323694	0.0817423	-0.402476	UNCHANGED	UNCHANGED	UNCHANGED	UNCHANGED
A0A445A0X3	2	1662.57	Uncharacterized protein	ATP synthase CF1 alpha subunit	P:nucleobase-containing compound metabolic process; P:transport; P:biosynthetic process;	270016	576068	242779	372607	340984	222385	683206	345007	334050	200853	424114	412397	362954	311992	454088	345788	0.683666	0.469322	0.71361	0.592014	-0.218278	-0.393083	0.148379	0.323183	UNCHANGED	UNCHANGED	UNCHANGED	UNCHANGED
A0A445BP87	2	1005.43	Ribosomal_L18_c domain-containing protein	60S ribosomal protein L5	P:translation; P:cellular component organization;	41213	81993.5	213854	136158	135472	133483	15693	77033	101738	82915	86957.5	129684	112354	135038	64821.2	99852	0.685762	0.302612	0.0786536	0.458783	0.265315	0.623326	-0.435497	-0.793508	UNCHANGED	UNCHANGED	UNCHANGED	UNCHANGED
A0A445CNY2	7	3879.53	Aldo_ket_red domain-containing protein	probable aldo-keto reductase 1	P:metabolic process	45112.8	32399.5	31807.8	29495.1	36478.9	36897.2	27448.9	40456.7	25389.7	47707.2	39615.9	41538.9	36440	34290.4	31098.4	42954	0.687048	0.0893751	0.0646157	0.451497	-0.08772	0.465951	0.324989	-0.228682	UNCHANGED	UNCHANGED	UNCHANGED	UNCHANGED
A0A445CA43	3	684.814	Uncharacterized protein	TolB protein		184793	249414	161723	214026	208120	207746	162756	154421	166857	167345	175720	178667	198643	209964	161345	173911	0.689299	0.0654285	0.000802923	0.232011	0.0799629	0.108201	-0.271793	-0.300031	UNCHANGED	UNCHANGED	UNCHANGED	UNCHANGED
A0A445AMC5	6	443.484	Uncharacterized protein	trans-cinnamate 4-monooxygenase	P:cellular process; P:secondary metabolic process;	37762.5	55584.5	119799	71041	49894	59258.7	17456	50663	42022	51362.3	40896	51796	71048.6	60064.6	36713.7	48018.1	0.690563	0.344921	0.164068	0.269742	-0.242291	0.387261	-0.322935	-0.952488	UNCHANGED	UNCHANGED	UNCHANGED	UNCHANGED
A0A445AF75	3	6549.68	Ribosomal_S10 domain-containing protein	40S ribosomal protein S20-2	P:translation;	150179	267826	371976	278204	287992	306091	104853	231840	275330	256138	275805	302790	263327	290762	204008	278244	0.692848	0.233178	0.472491	0.509352	0.142982	0.447729	-0.0634876	-0.368234	UNCHANGED	UNCHANGED	UNCHANGED	UNCHANGED
A0A444YCM7	8	1931.16	PfkB domain-containing protein	probable fructokinase-6, chloroplastic	P:carbohydrate metabolic process;	121923	153861	89818.4	149734	125488	116792	132280	154171	127592	230486	169112	193500	121867	130671	138014	197699	0.69591	0.0383927	0.0302586	0.469282	0.100632	0.518488	0.597363	0.179507	UNCHANGED	UNCHANGED	UNCHANGED	UNCHANGED
A0A444WS55	23	4886.28	Succinate dehydrogenase [ubiquinone] flavoprotein subunit, mitochondrial	succinate dehydrogenase [ubiquinone] flavoprotein subunit 1, mitochondrial	P:generation of precursor metabolites and energy;	201283	240914	263230	228882	251036	249779	207202	225359	243228	216900	242487	228949	235142	243232	225263	229445	0.699333	0.759499	0.252009	0.660879	0.0488001	0.0265401	-0.0841839	-0.061924	UNCHANGED	UNCHANGED	UNCHANGED	UNCHANGED
A0A445DA81	7	6400.76	Uncharacterized protein	probable mediator of RNA polymerase II transcription subunit 37c	P:response to stress; P:response to abiotic stimulus; P:cellular process; P:response to chemical;	4948.97	13607	18789	10698.7	11811	9776.33	12398.3	4641.83	12314.3	11068.3	11796.7	9978.33	12448.3	10762	9784.83	10947.8	0.700551	0.680689	0.825775	0.607561	-0.210005	0.162019	0.0246918	-0.347332	UNCHANGED	UNCHANGED	UNCHANGED	UNCHANGED
A0A445ANY1	14	13387.2	Proteasome subunit alpha type	proteasome subunit alpha type-6	P:catabolic process; P:cellular process; P:protein metabolic process;	358422	287155	287262	311164	279236	310829	329627	298443	255402	361704	411021	343738	310946	300410	294490	372154	0.705937	0.0577772	0.0343021	0.634585	-0.0497354	0.337679	0.308969	-0.0784453	UNCHANGED	UNCHANGED	UNCHANGED	UNCHANGED
A0A445D2M1	7	25208.8	Peroxiredoxin	peroxiredoxin-2B	P:response to stress; P:catabolic process; P:cellular homeostasis; P:response to chemical;	623307	537256	466822	577470	515896	466620	529221	518410	545497	513047	507733	534263	542462	519995	531043	518347	0.706127	0.32404	0.962653	0.815893	-0.0610231	-0.0349086	-0.00457892	-0.0306934	UNCHANGED	UNCHANGED	UNCHANGED	UNCHANGED
A0A444ZRW6	16	11237.6	Serine hydroxymethyltransferase	serine hydroxylmethyltransferase	P:biosynthetic process; P:cellular process;	567363	492291	573934	515535	527131	556145	450895	523474	477668	549618	550760	532999	544529	532937	484012	544459	0.708266	0.0511982	0.437462	0.146849	-0.0310439	0.16978	0.0308584	-0.169965	UNCHANGED	UNCHANGED	UNCHANGED	UNCHANGED
A0A445EMG5	3	1330.24	Peroxidase	peroxidase 40	P:response to stress; P:catabolic process; P:cellular process; P:response to chemical;	62033.2	98808.6	117455	80394.2	80250.9	97325.4	66298.9	106681	70507.5	80792.7	111077	85664.2	92765.6	85990.2	81162.6	92511.2	0.714361	0.514516	0.5841	0.605386	-0.109418	0.188813	0.105457	-0.192774	UNCHANGED	UNCHANGED	UNCHANGED	UNCHANGED
A0A445BZY4	13	3834.2	Uncharacterized protein	ADP,ATP carrier protein 1, mitochondrial	P:transport; P:response to chemical;	133585	193505	255743	216721	226771	183592	130167	194538	153275	213620	206824	197956	194278	209028	159327	206133	0.714853	0.0729995	0.844217	0.431316	0.105576	0.371589	-0.020119	-0.286132	UNCHANGED	UNCHANGED	UNCHANGED	UNCHANGED
A0A445EC07	4	1712.15	NAD(P)-bd_dom domain-containing protein	NADH dehydrogenase		133440	73131.7	40657	76913.7	97699	33789.5	100367	59261	107702	11683	38750	118606	82409.7	69467.4	89109.9	56346.3	0.715425	0.407788	0.742147	0.839877	-0.246479	-0.661264	-0.302014	0.112771	UNCHANGED	UNCHANGED	UNCHANGED	UNCHANGED
A0A444ZWW0	6	950.528	FBPase domain-containing protein	fructose-1,6-bisphosphatase, chloroplastic	P:carbohydrate metabolic process; P:biosynthetic process; P:cellular process;	35324.7	39498	40618	29935.7	39683.3	41288	42747.7	22719.7	35434.3	30821.7	38928	44556.3	38480.2	36969	33633.9	38102	0.717825	0.562251	0.842228	0.469274	-0.0578011	0.179951	0.0435507	-0.194202	UNCHANGED	UNCHANGED	UNCHANGED	UNCHANGED
A0A445DKT8	3	359.829	Uncharacterized protein	heat shock 70 kDa protein 17	P:response to stress; P:signal transduction; P:cell death; P:response to abiotic stimulus; P:response to chemical;	29182.3	35328.7	38992	36507	22233.5	38129	38766.5	54241.7	51970.3	52240.5	53099	37286.3	34501	32289.8	48326.2	47541.9	0.722615	0.916728	0.101572	0.0693496	-0.0955582	-0.0236037	0.558121	0.486166	UNCHANGED	UNCHANGED	UNCHANGED	UNCHANGED
A0A444XBV8	4	1286.35	Uncharacterized protein	pyrophosphate-energized vacuolar membrane proton pump	P:transport;	15792.4	29093.1	111430	38521.9	46839.7	37757.8	8917.06	29293.3	17752.1	27333	28675	26948	52105.2	41039.8	18654.1	27652	0.731367	0.203322	0.0105737	0.334149	-0.344405	0.567889	-0.569638	-1.48193	UNCHANGED	UNCHANGED	UNCHANGED	UNCHANGED
A0A445BE69	27	30922.1	Vacuolar proton pump subunit B	V-type proton ATPase subunit B2	P:transport; P:metabolic process;	629341	647302	786488	669047	677156	661928	533314	522910	526365	569396	605403	539231	687710	669377	527530	571343	0.731704	0.0864959	0.00751691	0.0322982	-0.0389818	0.115105	-0.228461	-0.382548	UNCHANGED	UNCHANGED	UNCHANGED	UNCHANGED
A0A445AWL1	11	3150.76	Ligase_CoA domain-containing protein	ATP-citrate synthase beta chain protein 1	P:nucleobase-containing compound metabolic process; P:lipid metabolic process; P:biosynthetic process;	81532.3	105697	188443	111876	114426	114143	86218.7	111113	98062	106618	108872	104048	125224	113482	98464.6	106513	0.735222	0.333466	0.0123754	0.464909	-0.142052	0.113349	-0.0914342	-0.346835	UNCHANGED	UNCHANGED	UNCHANGED	UNCHANGED
A0A445BI73	18	41955.6	Malate dehydrogenase	malate dehydrogenase	P:carbohydrate metabolic process; P:generation of precursor metabolites and energy	983925	831825	774881	843573	840685	838488	905962	832178	729933	750589	815889	778110	863544	840915	822691	781529	0.735277	0.491627	0.0352529	0.638957	-0.0383087	-0.0740509	-0.10566	-0.0699183	UNCHANGED	UNCHANGED	UNCHANGED	UNCHANGED
A0A444WXU4	5	904.101	Proline iminopeptidase	proline iminopeptidase	P:protein metabolic process;	94838.7	68092.3	60517.3	77342.3	73460	59999.3	77099.3	45174.7	48972	65129.3	44417.7	70523	74482.8	70267.2	57082	60023.3	0.736012	0.829954	0.34317	0.295833	-0.084055	0.0724876	-0.227328	-0.383871	UNCHANGED	UNCHANGED	UNCHANGED	UNCHANGED
A0A445D2N7	7	2395.52	Lactoylglutathione lyase	probable lactoylglutathione lyase, chloroplastic	P:catabolic process; P:cellular process	21420.5	73635.8	30325.4	32365.1	96537.7	26219.6	38024.9	37543.7	96733	30235.3	32759.1	100748	41793.9	51707.5	57433.9	54580.7	0.73825	0.929561	0.933256	0.571671	0.30708	-0.073511	0.078018	0.458609	UNCHANGED	UNCHANGED	UNCHANGED	UNCHANGED
A0A445CWK1	7	651.931	Aldedh domain-containing protein	NADP-dependent glyceraldehyde-3-phosphate dehydrogenase	P:metabolic process	251703	302609	142978	219002	239057	186398	328343	81210.2	74999.9	253489	228666	304727	232430	214819	161518	262294	0.740056	0.308183	0.155228	0.500255	-0.113675	0.699492	0.288063	-0.525104	UNCHANGED	UNCHANGED	UNCHANGED	UNCHANGED
A0A445A4W1	14	2991.95	Uncharacterized protein	ketol-acid reductoisomerase, chloroplastic	P:biosynthetic process; P:cellular process;	209140	232084	259106	247292	239098	230098	185234	211345	199967	290127	277449	292873	233443	238829	198849	286816	0.742088	0.000594891	0.00221203	0.10105	0.0329092	0.528455	0.264146	-0.2314	UNCHANGED	UNCHANGED	UNCHANGED	UNCHANGED
A0A445DUQ9	8	1657.34	Xylose isomerase	xylose isomerase	P:carbohydrate metabolic process	14251.9	19964.2	16355.7	16884.9	16940.9	18570.1	17113.7	14420	18474.8	15301.2	13851.4	21458.1	16857.3	17465.3	16669.5	16870.2	0.746766	0.942575	0.816122	0.931407	0.0511176	0.0172698	-0.0500102	-0.0161623	UNCHANGED	UNCHANGED	UNCHANGED	UNCHANGED
A0A445DA87	10	5763.51	Uncharacterized protein	heat shock cognate 70 kDa protein-like	P:response to stress; P:response to abiotic stimulus; P:cellular process; P:response to chemical;	54631.6	53104.8	26495.8	50903.2	43767.6	27853.3	87317	96592.6	55496	51891.8	49959.9	41707	44744.1	40841.4	79801.9	47852.9	0.749234	0.0674762	0.402476	0.0856333	-0.131665	-0.737817	0.228574	0.834726	UNCHANGED	UNCHANGED	UNCHANGED	UNCHANGED
A0A444X2Q0	8	4261.31	Eukaryotic translation initiation factor 3 subunit F	eukaryotic translation initiation factor 3 subunit F	P:cellular component organization;	76985.7	84435.3	55803.3	73578.7	63010	71428.7	79631	71533.7	70131	79585.3	78903.3	68955	72408.1	69339.1	73765.2	75814.6	0.754493	0.674779	0.241327	0.888338	-0.062482	0.0395341	0.128806	0.0267895	UNCHANGED	UNCHANGED	UNCHANGED	UNCHANGED
A0A445AA86	2	1472.65	Nascent polypeptide-associated complex subunit beta	basic transcription factor 3		13235.5	9674	33277	18521	17477	12600	8716.5	29073.5	21304	23193	11119	10974.5	18728.8	16199.3	19698	15095.5	0.755041	0.556469	0.81595	0.923184	-0.209327	-0.383931	-0.101816	0.0727881	UNCHANGED	UNCHANGED	UNCHANGED	UNCHANGED
A0A445DN91	16	6802.79	Guanosine nucleotide diphosphate dissociation inhibitor	guanosine nucleotide diphosphate dissociation inhibitor 1	P:transport; P:signal transduction;	446212	379709	282967	317918	362792	378254	346649	282596	261431	365142	407012	367368	369629	352988	296892	379841	0.759336	0.0459343	0.301148	0.248312	-0.0664603	0.355456	0.105777	-0.31614	UNCHANGED	UNCHANGED	UNCHANGED	UNCHANGED
A0A445DQH7	10	444.07	PDZ domain-containing protein	protease Do-like 7	P:protein metabolic process	112178	136681	73578.3	45714.3	108457	136303	80611	96873	104642	135277	121634	89157	107479	96824.9	94042	115356	0.75935	0.238627	0.571186	0.532322	-0.150609	0.294713	0.25264	-0.192682	UNCHANGED	UNCHANGED	UNCHANGED	UNCHANGED
A0A445DAK6	13	4778	Uncharacterized protein	F-box protein CPR1-like isoform X2		51635.8	83230.1	119211	75155	82472.7	77145.3	36714.2	47125.4	87499.9	68425	64763.7	62823.1	84692.4	78257.7	57113.2	65337.3	0.759652	0.625406	0.00911996	0.330472	-0.114001	0.194082	-0.260326	-0.568409	UNCHANGED	UNCHANGED	UNCHANGED	UNCHANGED
A0A445CBG9	3	600.856	SERPIN domain-containing protein	serpin-ZX	P:cellular protein modification process;	58821.7	35771.7	34052	49877	47253	39840	37471.7	62224.7	38548.3	51256.7	48737.3	41123.7	42881.8	45656.7	46081.6	47039.2	0.761311	0.917012	0.762801	0.792139	0.0904608	0.0296748	0.0430387	0.103825	UNCHANGED	UNCHANGED	UNCHANGED	UNCHANGED
A0A445CXE9	6	945.229	AA_TRNA_LIGASE_II domain-containing protein	aspartate--tRNA ligase 2, cytoplasmic	P:nucleobase-containing compound metabolic process; P:translation;	80286.1	81953.9	80380.4	83787.5	67003.7	86244.3	58492.1	79166.5	74580.5	87955.1	102354	104442	80873.5	79011.8	70746.3	98250.5	0.774378	0.0277464	0.073085	0.182777	-0.0335976	0.47381	0.314397	-0.193011	UNCHANGED	UNCHANGED	UNCHANGED	UNCHANGED
A0A445DMN9	8	3487.82	FabA domain-containing protein	beta-hydroxyacyl-ACP dehydrase 1	P:lipid metabolic process; P:biosynthetic process; P:cellular process;	134311	92546.1	146209	118336	103429	134383	155538	191650	109692	164822	231122	146382	124355	118716	152293	180775	0.776446	0.461347	0.0849361	0.386351	-0.066955	0.247343	0.606682	0.292384	UNCHANGED	UNCHANGED	UNCHANGED	UNCHANGED
A0A445BC65	5	1097.9	SOR_SNZ domain-containing protein	pyridoxal 5'-phosphate synthase subunit PDX1.3	P:biosynthetic process; P:cellular process	66820	73292.3	56673	67635.3	39508	108156	80207	95034.7	100233	84166.7	108387	88426.3	65595.1	71766.4	91824.8	93660	0.778414	0.857375	0.36164	0.0271852	0.129721	0.0285495	0.384124	0.485295	UNCHANGED	UNCHANGED	UNCHANGED	UNCHANGED
A0A445CB29	7	1376.2	Importin N-terminal domain-containing protein	importin subunit beta-1	P:transport;	24824.6	24615.7	27667.8	26215.3	25944.5	25837.9	20489.4	24749.7	28917.3	24309.8	23742.4	23378.7	25702.7	25999.2	24718.8	23810.3	0.77962	0.729369	0.00172258	0.726793	0.0165495	-0.0540235	-0.126882	-0.0563086	UNCHANGED	UNCHANGED	UNCHANGED	UNCHANGED
A0A445BQI5	2	1487.53	Aconitase_C domain-containing protein	3-isopropylmalate dehydratase small subunit 3-like		202580	212444	122655	187454	189941	129318	166643	84103	129410	112440	132278	143019	179226	168904	126719	129246	0.780603	0.925801	0.142139	0.230089	-0.0855763	0.0284869	-0.38609	-0.500154	UNCHANGED	UNCHANGED	UNCHANGED	UNCHANGED
A0A445B1A4	7	1398.16	MGS domain-containing protein	Bifunctional purine biosynthesis protein PurH	P:nucleobase-containing compound metabolic process; P:biosynthetic process;	112303	115715	91662.7	102723	115074	93150	108277	89713	96795.7	91618	112213	92156.7	106560	103649	98261.9	98662.6	0.781936	0.965359	0.619704	0.420738	-0.0399659	0.00587068	-0.0711285	-0.116965	UNCHANGED	UNCHANGED	UNCHANGED	UNCHANGED
A0A444ZJQ9	7	1003.46	Peptidase_M24 domain-containing protein	ERBB-3 BINDING PROTEIN 1	P:protein metabolic process;	27816.3	75874.7	106529	81993.3	68999.7	79640	14851	67972.3	71143	80900	141390	103089	70073.4	76877.7	51322.1	108460	0.784366	0.0877512	0.156192	0.556919	0.133697	1.07951	0.496524	-0.449287	UNCHANGED	UNCHANGED	UNCHANGED	UNCHANGED
A0A444ZMU5	5	1305.72	AB hydrolase-1 domain-containing protein	proline iminopeptidase-like protein	P:protein metabolic process;	65496.7	65536.7	52560	67408	57283.3	53743.7	65530.7	30389	33601.3	57538.7	62435	59598	61197.8	59478.3	43173.7	59857.2	0.786995	0.214087	0.934529	0.208109	-0.041115	0.471374	0.00916111	-0.503328	UNCHANGED	UNCHANGED	UNCHANGED	UNCHANGED
A0A445EIW8	13	3517.89	Uncharacterized protein	DEAD-box ATP-dependent RNA helicase 56 isoform X1	P:carbohydrate metabolic process; P:nucleobase-containing compound metabolic process;	140152	150189	178923	161279	145143	152117	110287	157613	144160	160876	165447	151832	156422	152846	137353	159385	0.789421	0.206709	0.347698	0.355162	-0.0333588	0.214626	0.0604346	-0.187551	UNCHANGED	UNCHANGED	UNCHANGED	UNCHANGED
A0A445DQ58	23	12648.3	UTP--glucose-1-phosphate uridylyltransferase	UTP--glucose-1-phosphate uridylyltransferase	P:carbohydrate metabolic process; P:generation of precursor metabolites and energy; P:nucleobase-containing compound metabolic process;	584861	510004	403787	507734	477845	467521	532426	457769	451477	609645	546797	559247	499551	484367	480557	571896	0.792134	0.0475638	0.0181673	0.762138	-0.0445317	0.251045	0.239654	-0.0559231	UNCHANGED	UNCHANGED	UNCHANGED	UNCHANGED
A0A445D2Y2	14	38294.7	Photosystem II CP47 reaction center protein	photosystem II CP47 chlorophyll apoprotein	P:generation of precursor metabolites and energy; P:cellular protein modification process; P:photosynthesis;	163060	234964	315939	210068	257824	206854	135851	296592	310479	264091	277801	269041	237988	224915	247641	270311	0.795255	0.707212	0.0554326	0.898913	-0.0815057	0.126369	0.265236	0.0573607	UNCHANGED	UNCHANGED	UNCHANGED	UNCHANGED
A0A444X4N2	4	3613.05	SAM domain-containing protein	chloroplastic import inner membrane translocase subunit HP30-2	P:transport; P:cellular component organization;	57425.7	56637.7	85663.5	66947.7	63178	61608	59898.7	41723.3	53691	51015.7	55071.7	49006.7	66575.6	63911.2	51771	51698	0.796704	0.990266	0.00689053	0.247241	-0.0589245	-0.00203572	-0.305961	-0.36285	UNCHANGED	UNCHANGED	UNCHANGED	UNCHANGED
A0A444XPN3	3	3954.26	Eukaryotic translation initiation factor 6	eukaryotic translation initiation factor 6-2	P:transport; P:cellular component organization;	36966.6	41928.3	30222.1	32743.9	32563.5	40330.4	40873.2	52926.3	65162.7	46616.5	39067.7	40076.5	36372.3	35212.6	52987.4	41920.2	0.798431	0.209109	0.126627	0.0998645	-0.0467503	-0.338002	0.251556	0.542807	UNCHANGED	UNCHANGED	UNCHANGED	UNCHANGED
A0A445BF14	3	1085.44	PKS_ER domain-containing protein	probable cinnamyl alcohol dehydrogenase	P:biosynthetic process; P:cellular process; P:secondary metabolic process	105393	80911	172462	93134.7	136945	104104	165301	130096	130206	110508	128704	121518	119588	111395	141868	120243	0.800633	0.167852	0.56659	0.495802	-0.102399	-0.238593	0.110275	0.24647	UNCHANGED	UNCHANGED	UNCHANGED	UNCHANGED
A0A445BGN3	12	848.187	Coatomer subunit alpha	coatomer subunit alpha-2-like	P:transport;	15344	38321.8	25009.6	23965.9	26909.7	22362.2	19968.3	63882	70186.7	36562.8	32151.2	32923.7	26225.1	24412.6	51345.7	33879.2	0.80279	0.332379	0.00763363	0.21665	-0.103323	-0.599842	0.472774	0.969293	UNCHANGED	UNCHANGED	UNCHANGED	UNCHANGED
A0A444WXJ6	6	679.921	WD_REPEATS_REGION domain-containing protein	serine-threonine kinase receptor-associated protein		33852	33488.3	18483	28128.7	33588.3	28396.3	36293.7	30864.7	27680	33772.3	32282.7	26612.3	28607.8	30037.8	31612.8	30889.1	0.803042	0.838536	0.777278	0.623197	0.0703706	-0.0334095	0.0403203	0.1441	UNCHANGED	UNCHANGED	UNCHANGED	UNCHANGED
A0A445BXJ4	3	1943.36	FAS1 domain-containing protein	fasciclin-like arabinogalactan protein 13	P:cellular process;	152432	145680	47270.7	148838	111388	113273	126426	124544	94558	169664	164282	139664	115128	124500	115176	157870	0.807977	0.0368447	0.094421	0.998977	0.112913	0.454901	0.342596	0.000606943	UNCHANGED	UNCHANGED	UNCHANGED	UNCHANGED
A0A445DNF3	7	1800.01	T-complex protein 1 subunit delta	T-complex protein 1 subunit delta	P:cellular process; P:response to chemical;	63088.7	120404	83054.3	98964.7	96021.3	84994	97484.7	140653	61077.7	125350	112505	110027	88848.9	93326.7	99738.3	115961	0.80883	0.527702	0.0237835	0.721644	0.0709356	0.217414	0.313273	0.166794	UNCHANGED	UNCHANGED	UNCHANGED	UNCHANGED
A0A445E7N6	18	7485.11	Pyr_redox_2 domain-containing protein	monodehydroascorbate reductase	P:metabolic process	386573	459684	728839	552582	531385	572097	331625	421527	431472	552604	561060	530646	525032	552021	394875	548104	0.809347	0.00973343	0.804888	0.297653	0.0723187	0.473054	-0.0102748	-0.41101	UNCHANGED	UNCHANGED	UNCHANGED	UNCHANGED
A0A444YBV0	9	4414.83	Uncharacterized protein	CBS domain-containing protein CBSX3, mitochondrial		274085	242973	216257	247948	267059	233252	214878	200700	162236	260700	261720	273648	244439	249420	192605	265356	0.809689	0.0110528	0.208307	0.0867805	0.0291042	0.462287	0.0893535	-0.343829	UNCHANGED	UNCHANGED	UNCHANGED	UNCHANGED
A0A445D9W9	7	1977	Uncharacterized protein	glycine--tRNA ligase, mitochondrial 1-like	P:nucleobase-containing compound metabolic process; P:translation;	41071.7	50662.7	57733.7	42637.2	47902.3	65385	41238.8	55720.8	48027.2	205527	107359	81520.2	49822.7	51974.9	48328.9	131469	0.81045	0.093936	0.107169	0.826606	0.0610115	1.44376	1.33884	-0.0439147	UNCHANGED	UNCHANGED	UNCHANGED	UNCHANGED
A0A445ETR1	12	1820.34	Methylenetetrahydrofolate reductase	methylenetetrahydrofolate reductase 2	P:biosynthetic process; P:cellular process;	50494.3	83701	109737	75662.3	65706.3	88494	72093	112718	87377	77035	106209	60661.7	81310.7	76620.9	90729.3	81301.8	0.81107	0.624888	0.768567	0.674705	-0.0857069	-0.158282	0.0855491	0.158124	UNCHANGED	UNCHANGED	UNCHANGED	UNCHANGED
A0A445E165	4	1683.94	Uncharacterized protein	dnaJ protein homolog	P:response to stress; P:response to abiotic stimulus; P:cellular process;	58359.3	87215.3	53707.5	71587.3	74657.3	61568.3	54555	82931.3	64901	79104.7	61318	79928	66427.4	69271	67462.4	73450.2	0.812106	0.591366	0.594895	0.941981	0.0604733	0.122682	0.0845154	0.0223064	UNCHANGED	UNCHANGED	UNCHANGED	UNCHANGED
A0A444XDL1	6	19085.2	Nucleoside diphosphate kinase	nucleoside diphosphate kinase 1	P:nucleobase-containing compound metabolic process; P:signal transduction; P:biosynthetic process; P:response to light stimulus; P:response to external stimulus	490284	535348	502713	486716	572263	492232	541524	483761	567290	502375	579999	545572	509448	517070	530859	542648	0.81636	0.741753	0.512343	0.488766	0.0214241	0.0316903	0.0696576	0.0593914	UNCHANGED	UNCHANGED	UNCHANGED	UNCHANGED
A0A445AXY9	3	546.139	PFK domain-containing protein	Pyrophosphate--fructose 6-phosphate 1-phosphotransferase subunit beta	P:carbohydrate metabolic process; P:generation of precursor metabolites and energy; P:nucleobase-containing compound metabolic process; P:catabolic process;	144126	136990	123910	130465	107966	155557	87714.3	98161	119178	133746	140668	142710	135009	131329	101685	139041	0.817879	0.0179249	0.61131	0.0386293	-0.0398664	0.451411	0.0823229	-0.408954	UNCHANGED	UNCHANGED	UNCHANGED	UNCHANGED
A0A445CTA4	15	1694.11	Alpha-mannosidase	probable alpha-mannosidase At5g13980	P:carbohydrate metabolic process;	212200	214939	164288	198625	192928	212750	164805	231461	194704	213501	220069	239924	197142	201434	196990	224498	0.818014	0.257471	0.0800659	0.995489	0.0310729	0.188581	0.156393	-0.00111568	UNCHANGED	UNCHANGED	UNCHANGED	UNCHANGED
A0A445AUI1	18	5846.39	Aldedh domain-containing protein	aldehyde dehydrogenase family 2 member B4, mitochondrial	P:metabolic process	376748	399504	481419	404818	451808	372951	376165	315257	345107	341517	326542	370858	419224	409859	345510	346306	0.822824	0.972718	0.0733526	0.112293	-0.0325923	0.00331984	-0.243081	-0.278993	UNCHANGED	UNCHANGED	UNCHANGED	UNCHANGED
A0A445AHX0	2	474.086	LRRNT_2 domain-containing protein	polygalacturonase inhibitor-like		176562	160875	74090	144952	124834	118528	184438	147488	112134	174550	181324	122526	137176	129438	148020	159467	0.825343	0.703029	0.21152	0.790023	-0.0837616	0.107466	0.300997	0.109769	UNCHANGED	UNCHANGED	UNCHANGED	UNCHANGED
A0A445DTY1	14	3528.26	Pyr_redox_2 domain-containing protein	monodehydroascorbate reductase 5, mitochondrial	P:response to stress; P:metabolic process; P:response to abiotic stimulus; P:response to chemical;	227468	337889	294833	333654	241087	256351	195951	216437	229285	232761	255733	294848	286730	277031	213891	261114	0.832796	0.0832208	0.663179	0.0958095	-0.0496461	0.287804	-0.0853665	-0.422817	UNCHANGED	UNCHANGED	UNCHANGED	UNCHANGED
A0A444YCC5	21	6025.24	Glutamate decarboxylase	Glutamate decarboxylase 1	P:catabolic process; P:cellular process;	152524	184933	193520	196950	193397	153165	239702	196856	235231	213379	181414	210689	176992	181171	223929	201827	0.834887	0.263896	0.300252	0.0637914	0.0336636	-0.149922	0.155773	0.339359	UNCHANGED	UNCHANGED	UNCHANGED	UNCHANGED
A0A445B1X8	14	11004.3	Proteasome subunit alpha type	proteasome subunit alpha type-3	P:catabolic process; P:cellular process; P:protein metabolic process;	271637	250875	188654	239247	247017	241268	282378	269144	263568	248772	257534	266633	237055	242511	271697	257647	0.838192	0.138054	0.0554895	0.246616	0.0328257	-0.0766036	0.0873458	0.196775	UNCHANGED	UNCHANGED	UNCHANGED	UNCHANGED
A0A445DTV1	7	653.259	Uncharacterized protein	puromycin-sensitive aminopeptidase isoform X3	P:protein metabolic process	16193.7	22907.2	38861.5	21790.6	23275.1	38392.7	11067	40653.3	24347.3	46243.4	60899.4	37099.7	25987.4	27819.5	25355.9	48080.8	0.841049	0.107986	0.0810107	0.956498	0.0982809	0.923142	0.789367	-0.0354938	UNCHANGED	UNCHANGED	UNCHANGED	UNCHANGED
A0A444X5B5	4	6442.33	Histone H3	histone H3.2		18799	140642	477089	214974	174351	158615	33551.5	111834	291461	225727	218391	357649	212177	182647	145615	267256	0.841104	0.242356	0.154445	0.693178	-0.216211	0.876058	0.549165	-0.543103	UNCHANGED	UNCHANGED	UNCHANGED	UNCHANGED
A0A444XBQ4	9	4778.78	Uncharacterized protein	mitochondrial dicarboxylate/tricarboxylate transporter DTC	P:transport;	253775	269197	206916	251012	267941	224140	232021	211937	174539	170833	223680	216862	243296	247698	206166	203792	0.855426	0.924859	0.103916	0.214441	0.0258677	-0.016709	-0.281485	-0.238908	UNCHANGED	UNCHANGED	UNCHANGED	UNCHANGED
A0A445C227	23	5616.26	Myb-like domain-containing protein	ribonuclease J isoform X1	P:catabolic process; P:cellular process; P:protein metabolic process;	59427.1	51309.7	41327.7	39035.7	47952.3	71356.7	64619.9	73940	63193	78570.3	98254.3	69615.7	50688.2	52781.6	67251	82146.8	0.857918	0.177179	0.0838537	0.0563508	0.0583851	0.288649	0.63817	0.407906	UNCHANGED	UNCHANGED	UNCHANGED	UNCHANGED
A0A444X977	4	1774.16	CN hydrolase domain-containing protein	omega-amidase, chloroplastic	P:metabolic process; P:cellular process;	106318	75904	92265	96116.3	103551	81107.3	100894	111078	98258.3	101749	86497	82609.3	91495.7	93591.6	103410	90285.1	0.858055	0.13522	0.7266	0.28317	0.0326749	-0.195817	-0.0518903	0.176602	UNCHANGED	UNCHANGED	UNCHANGED	UNCHANGED
A0A444WPE0	2	982.259	Uncharacterized protein	glucan endo-1,3-beta-glucosidase, basic isoform	P:carbohydrate metabolic process;	23464	85115.5	95204	52493	76166.5	61871	71960.5	25814	57303	53055.5	53496.5	75200	67927.8	63510.2	51692.5	60584	0.859772	0.595814	0.785192	0.569467	-0.0970153	0.228982	-0.0680507	-0.394048	UNCHANGED	UNCHANGED	UNCHANGED	UNCHANGED
A0A444YZE6	4	2753.38	Uncharacterized protein	probable caffeoyl-CoA O-methyltransferase At4g26220	P:metabolic process	137913	178871	59945.8	143013	118320	94716.6	124156	115843	149814	142587	127910	152759	125577	118683	129938	141085	0.863326	0.423308	0.226739	0.910283	-0.0814507	0.118745	0.249448	0.0492523	UNCHANGED	UNCHANGED	UNCHANGED	UNCHANGED
A0A444WW48	14	14183.7	Pectin acetylesterase	pectin acetylesterase 8	P:cellular component organization;	461402	529414	555764	529698	625693	426395	364208	369125	382384	462318	465434	457580	515527	527262	371906	461777	0.863525	0.000107504	0.319	0.0074042	0.0324729	0.312258	-0.191324	-0.471109	UNCHANGED	UNCHANGED	UNCHANGED	UNCHANGED
A0A445BYZ0	17	3341.85	Uncharacterized protein	ADP,ATP carrier protein 1, mitochondrial	P:transport; P:response to chemical;	125946	146760	173746	149611	172484	112163	106686	148626	127019	179343	193459	157270	148817	144753	127444	176691	0.864675	0.0373348	0.194141	0.309693	-0.0399527	0.471364	0.287636	-0.223681	UNCHANGED	UNCHANGED	UNCHANGED	UNCHANGED
A0A445AND8	34	21468.7	HATPase_c domain-containing protein	heat shock cognate protein 80	P:response to stress; P:response to abiotic stimulus; P:cellular process;	257608	565476	1.03624e+06	658940	686538	635600	204189	456228	499151	593338	592286	627321	619776	660359	386522	604315	0.866733	0.0786116	0.0399673	0.393907	0.0915045	0.644748	-0.127951	-0.681195	UNCHANGED	UNCHANGED	UNCHANGED	UNCHANGED
A0A445EKD7	8	3077.65	Uncharacterized protein	3-ketoacyl-CoA synthase 11	P:lipid metabolic process; P:biosynthetic process; P:cellular process;	5323.18	8459.81	3101.05	7172.59	3989.06	4752.07	7945.12	9224.07	9264.64	6608.8	5715.94	5771.48	5628.02	5304.58	8811.28	6032.07	0.86807	0.00593453	0.508073	0.119802	-0.0853888	-0.546697	0.185417	0.646725	UNCHANGED	UNCHANGED	UNCHANGED	UNCHANGED
A0A445BG04	5	2550.9	ADF-H domain-containing protein	zinc finger CCHC domain-containing protein 9	P:transport; P:cellular component organization;	70791.7	64522.5	39842	70605	55790	54475	61161	69159.3	53083.3	56802.7	39209.3	39732.3	58385.4	60290	61134.6	45248.1	0.868219	0.0987137	0.124438	0.806833	0.0463114	-0.434131	-0.414061	0.0663807	UNCHANGED	UNCHANGED	UNCHANGED	UNCHANGED
A0A445CM38	24	6145.77	Uncharacterized protein	rhomboid-like protein 15 isoform X1	P:translation; P:response to stress; P:signal transduction; P:catabolic process; P:response to chemical;	328491	277731	250677	335870	258384	243281	216522	310742	185302	377105	283038	261038	285633	279178	237522	307061	0.868735	0.25096	0.574826	0.336264	-0.0329753	0.370462	0.137336	-0.266102	UNCHANGED	UNCHANGED	UNCHANGED	UNCHANGED
A0A444XT34	2	1462.75	ATP synthase subunit d, mitochondrial	ATP synthase subunit d, mitochondrial	P:nucleobase-containing compound metabolic process; P:transport; P:biosynthetic process;	39986	59504	62348	67108.5	53701.5	34940	26705.5	24110	63055	43896	37229	88351	53946	51916.7	37956.8	56492	0.870506	0.414619	0.81742	0.32917	-0.0553182	0.573687	0.121849	-0.507156	UNCHANGED	UNCHANGED	UNCHANGED	UNCHANGED
A0A445ACL3	9	2998.32	Cation_ATPase_N domain-containing protein	calcium-transporting ATPase, endoplasmic reticulum-type	P:transport; P:cellular homeostasis;	42079.5	19326.3	5953.56	19640.9	24985.3	17374.7	25470.9	23607.8	19663.3	21659.7	20919.2	19045.3	22453.1	20667	22914	20541.4	0.876482	0.275623	0.960557	0.967658	-0.119588	-0.157694	-0.00879305	0.0293125	UNCHANGED	UNCHANGED	UNCHANGED	UNCHANGED
A0A444ZW17	11	796.703	Peptidase_M3 domain-containing protein	probable cytosolic oligopeptidase A	P:cellular process; P:protein metabolic process;	55991.5	46838.4	62633.6	48863.5	51023.6	62497.9	36960.1	53405.3	60505.5	67881.1	62874.2	67609.5	55154.5	54128.3	50290.3	66121.6	0.877244	0.0915197	0.0572181	0.591124	-0.0270945	0.394842	0.288738	-0.133199	UNCHANGED	UNCHANGED	UNCHANGED	UNCHANGED
A0A445BMR3	4	665.139	Peroxidase	peroxidase A2	P:response to stress; P:catabolic process; P:cellular process; P:response to chemical;	246831	195138	172544	219725	184900	198010	312616	282020	277999	266642	253474	224071	204838	200878	290878	248063	0.878056	0.0620648	0.0433288	0.0248027	-0.0281611	-0.229711	0.304384	0.505934	UNCHANGED	UNCHANGED	UNCHANGED	UNCHANGED
A0A445A5Z7	3	1815.03	DLH domain-containing protein	Protein usf		464366	461472	442158	520170	479164	387704	445760	375728	398492	381440	257025	395212	455999	462346	406660	344559	0.880924	0.269984	0.115958	0.0860821	0.0199438	-0.239074	-0.424224	-0.165206	UNCHANGED	UNCHANGED	UNCHANGED	UNCHANGED
A0A444Y8X9	24	8230.35	Lipoxygenase	linoleate 9S-lipoxygenase	P:lipid metabolic process; P:biosynthetic process; P:cellular process;	326140	382801	711164	468014	539325	470360	217999	399703	418490	579004	543865	454474	473369	492566	345397	525781	0.882847	0.0711359	0.490763	0.399945	0.0573542	0.606205	0.0941444	-0.454706	UNCHANGED	UNCHANGED	UNCHANGED	UNCHANGED
A0A444YR78	29	12648.3	Uncharacterized protein	5-methyltetrahydropteroyltriglutamate--homocysteine methyltransferase 1	P:biosynthetic process; P:cellular process;	685036	723547	971843	765398	747761	824642	574572	659145	556132	724977	745540	720945	793475	779267	596616	730487	0.885767	0.0147989	0.116956	0.107771	-0.0260678	0.292055	-0.0932591	-0.411382	UNCHANGED	UNCHANGED	UNCHANGED	UNCHANGED
A0A444YIK7	3	769.679	Pectinesterase	pectinesterase-like isoform X1	P:carbohydrate metabolic process; P:catabolic process; P:cellular component organization;	10262.5	22443.9	11280	17787	16078	11984.1	23885.4	30718.9	21739.4	18297.4	18273.5	14299.1	14662.1	15283.1	25447.9	16956.7	0.89129	0.0480451	0.484501	0.0856272	0.059837	-0.585695	0.149919	0.795451	UNCHANGED	UNCHANGED	UNCHANGED	UNCHANGED
A0A444YVU0	3	992.791	Uncharacterized protein	far upstream element-binding protein 2	P:transport;	88314	99452.7	113980	97500.3	92739.3	107985	99302.7	119928	115863	101952	111832	112328	100582	99408.1	111698	108704	0.899035	0.69715	0.174043	0.31775	-0.0169399	-0.0391969	0.128971	0.151228	UNCHANGED	UNCHANGED	UNCHANGED	UNCHANGED
A0A445CFS4	7	11980.9	RRM domain-containing protein	glycine-rich RNA-binding protein	P:nucleobase-containing compound metabolic process;	1983.11	2780.49	1459.34	2210.83	2933.1	1322.26	1779.44	2440.18	2325.36	1439.61	2264.17	1358.04	2074.31	2155.4	2181.66	1687.27	0.899654	0.235025	0.441432	0.817157	0.0553203	-0.370734	-0.35326	0.0727942	UNCHANGED	UNCHANGED	UNCHANGED	UNCHANGED
A0A444YMM7	7	2907.67	Uncharacterized protein	ras-related protein RABE1a	P:transport; P:signal transduction;	78097.8	96098.3	49056.3	73670.3	56725.1	86391.4	92033.1	85315.6	80511.8	64560.8	81804.1	77432.5	74417.4	72262.3	85953.5	74599.1	0.900438	0.139083	0.827227	0.459362	-0.0423984	-0.204398	0.0459158	0.207916	UNCHANGED	UNCHANGED	UNCHANGED	UNCHANGED
A0A444ZCV0	2	393.44	Uncharacterized protein	tropinone reductase-like 3	P:metabolic process	59437.5	55616	52496.5	53963	74094	43111.5	46518.5	42761	48703	46409.5	51386.5	55217.5	55850	57056.2	45994.2	51004.5	0.903025	0.179595	0.555884	0.0205696	0.0308255	0.149174	-0.161758	-0.280106	UNCHANGED	UNCHANGED	UNCHANGED	UNCHANGED
A0A445AHR4	7	1898.55	Pyruvate kinase	pyruvate kinase 1, cytosolic-like	P:carbohydrate metabolic process; P:generation of precursor metabolites and energy; P:nucleobase-containing compound metabolic process; P:catabolic process	111986	139795	174789	140766	123537	171152	107478	109286	119591	166208	157582	145812	142190	145152	112118	156534	0.903283	0.0031808	0.493527	0.180432	0.0297428	0.481457	0.10891	-0.342804	UNCHANGED	UNCHANGED	UNCHANGED	UNCHANGED
A0A444Y8V2	25	1957.64	Uncharacterized protein	ABC transporter G family member 36	P:transport; P:metabolic process;	133104	123990	81139.5	115685	140455	89952.8	94890	116793	114464	139395	113837	112142	112744	115364	108716	121791	0.909561	0.308722	0.72517	0.828843	0.033142	0.163852	0.0782133	-0.0524963	UNCHANGED	UNCHANGED	UNCHANGED	UNCHANGED
A0A444YFL6	32	19945.8	HATPase_c domain-containing protein	heat shock cognate protein 80	P:response to stress; P:response to abiotic stimulus; P:cellular process;	211872	462506	671527	456327	486550	451315	174097	469111	458889	507375	474379	515641	448635	464731	367366	499132	0.90973	0.247918	0.108956	0.646835	0.0508537	0.442203	0.103025	-0.288324	UNCHANGED	UNCHANGED	UNCHANGED	UNCHANGED
A0A444ZU48	4	1188.34	Uncharacterized protein	mitochondrial import receptor subunit TOM40-1	P:nucleobase-containing compound metabolic process; P:cellular protein modification process; P:transport; P:signal transduction; P:cellular component organization; P:cellular homeostasis;	40488.4	36686.8	20173	28980.8	48940.7	22953.1	44704.4	36415.2	34517.4	24945.5	21415.8	36784.6	32449.4	33624.9	38545.7	27715.3	0.912334	0.125345	0.552541	0.431505	0.0513366	-0.475885	-0.278844	0.248377	UNCHANGED	UNCHANGED	UNCHANGED	UNCHANGED
A0A445CWY8	2	589.833	AAA domain-containing protein	ATP-dependent zinc metalloprotease FTSH 4, mitochondrial	P:protein metabolic process;	105754	96210.4	39470.5	105374	109874	15179.9	101073	57332.6	111583	102921	93542	90009.7	80478.3	76809.3	89996.2	95490.9	0.926055	0.763413	0.580209	0.737927	-0.0673185	0.0855001	0.314082	0.161263	UNCHANGED	UNCHANGED	UNCHANGED	UNCHANGED
A0A445E8C3	3	1789.66	Uncharacterized protein	hydroxyisourate hydrolase	P:carbohydrate metabolic process; P:nucleobase-containing compound metabolic process; P:catabolic process;	4786.71	11336.4	11770.9	9975.61	9918.81	7286.76	6378.24	20970.9	18920	14815.5	10524.3	25986.4	9298	9060.39	15423.1	17108.7	0.92672	0.807713	0.1615	0.295175	-0.0373471	0.149644	0.917087	0.730096	UNCHANGED	UNCHANGED	UNCHANGED	UNCHANGED
A0A445EEJ7	9	13256.2	C2 domain-containing protein	cyclin D1/2/4	P:generation of precursor metabolites and energy; P:photosynthesis;	116827	121434	124334	103740	139276	122444	112652	104407	148359	91777	94102	92107.2	120865	121820	121806	92662.1	0.931868	0.0971537	0.0471566	0.948404	0.011353	-0.394534	-0.394699	0.0111881	UNCHANGED	UNCHANGED	UNCHANGED	UNCHANGED
A0A445C262	3	742.526	Aconitase domain-containing protein	3-isopropylmalate dehydratase large subunit, chloroplastic	P:translation;	78213.3	61157	71733.3	70572.7	65034	73996	94584	103774	85959.5	107018	108299	76622.7	70367.9	69867.6	94772.3	97313.4	0.933279	0.836768	0.0619292	0.0269813	-0.0102946	0.0381724	0.478016	0.429549	UNCHANGED	UNCHANGED	UNCHANGED	UNCHANGED
A0A445CS98	6	25428.6	Ribosomal_L7Ae domain-containing protein	60S ribosomal protein L30		74327.9	108678	108616	105446	97856.9	91520.9	72260.6	107172	113214	95415.3	91535	100979	97207.2	98274.6	97548.9	95976.3	0.934095	0.909928	0.661546	0.985051	0.015755	-0.0234468	-0.0341399	0.0050619	UNCHANGED	UNCHANGED	UNCHANGED	UNCHANGED
A0A445D9V9	20	12626.8	Uncharacterized protein	transaldolase	P:carbohydrate metabolic process; P:generation of precursor metabolites and energy;	247806	304721	214408	282392	258010	218377	223269	115987	221339	249270	274891	306651	255645	252926	186865	276937	0.936958	0.0828037	0.390667	0.194452	-0.0154246	0.567564	0.130843	-0.452145	UNCHANGED	UNCHANGED	UNCHANGED	UNCHANGED
A0A444YJU5	5	3539.99	Uncharacterized protein	60S ribosomal protein L22-2	P:translation;	85387.5	136945	49764	104766	85657.7	88218	64039.5	86886	122787	116349	76449.7	127100	90698.8	92880.5	91237.6	106633	0.937174	0.540186	0.45222	0.986771	0.0342912	0.224951	0.199204	0.00854406	UNCHANGED	UNCHANGED	UNCHANGED	UNCHANGED
A0A444WNW6	2	1882.87	WPP domain-containing protein	MFP1 attachment factor 1		46227.5	110422	138994	101122	94796	106186	85511.5	26394	75995.5	76806	56687	102559	98547.8	100701	62633.7	78684	0.941621	0.517319	0.182758	0.337496	0.031182	0.329132	-0.355936	-0.653886	UNCHANGED	UNCHANGED	UNCHANGED	UNCHANGED
A0A445A908	9	1837.76	Uncharacterized protein	allene oxide synthase 3	P:lipid metabolic process	193186	174377	64963.7	125409	177185	119911	187461	204197	231047	191077	203144	218947	144176	140835	207569	204389	0.943059	0.842945	0.0333498	0.205221	-0.0338173	-0.022268	0.537311	0.525761	UNCHANGED	UNCHANGED	UNCHANGED	UNCHANGED
A0A445BTV1	9	1940.21	14_3_3 domain-containing protein	14-3-3-like protein B	P:reproduction; P:post-embryonic development; P:cellular component organization; P:cell growth; P:cell differentiation	55063.6	67947.1	66974	71814.9	61157.6	55622.1	45953.7	32084.6	50333.5	46129.3	46297.9	58668.7	63328.2	62864.8	42790.6	50365.3	0.944926	0.333414	0.118685	0.0406264	-0.0105956	0.235137	-0.319823	-0.565556	UNCHANGED	UNCHANGED	UNCHANGED	UNCHANGED
Q45W77	7	5447.57	Ubiquitin-conjugating enzyme 1	ubiquitin-conjugating enzyme E2 36	P:DNA metabolic process; P:cellular protein modification process; P:response to stress; P:multicellular organism development; P:catabolic process; P:cell differentiation; P:response to chemical;	97379.3	116696	71699.7	93627.7	94052	95315.7	94437.3	40840.7	98013	80692.7	87728.7	108566	95258.3	94331.8	77763.7	92329	0.946775	0.512654	0.822936	0.482472	-0.0141015	0.247688	-0.03096	-0.292749	UNCHANGED	UNCHANGED	UNCHANGED	UNCHANGED
A0A445A3P9	16	1526.66	Uncharacterized protein	phosphoenolpyruvate carboxylase, housekeeping isozyme	P:generation of precursor metabolites and energy; P:multicellular organism development; P:photosynthesis;	68329.6	88543.1	75558.3	86243.4	72144.7	75235	65419.1	77374.6	77778	85964.6	80601.6	75962	77477	77874.3	73523.9	80842.7	0.959195	0.215502	0.596137	0.610738	0.00738025	0.136905	0.05397	-0.0755543	UNCHANGED	UNCHANGED	UNCHANGED	UNCHANGED
A0A445AIA4	5	2996.21	Uncharacterized protein	homoserine kinase	P:response to external stimulus; P:response to biotic stimulus;	51803	48970.7	70240	62629	51266	55955	44540.3	61194	55126.3	74518.7	71527	72790	57004.6	56616.7	53620.2	72945.2	0.960913	0.0173975	0.0087124	0.702826	-0.00985041	0.444036	0.365587	-0.0883	UNCHANGED	UNCHANGED	UNCHANGED	UNCHANGED
A0A444XM91	2	615.659	Serine/threonine-protein phosphatase	serine/threonine-protein phosphatase PP1	P:cellular protein modification process;	22022.5	29086	14336	22729.5	22093	19963.5	28607.5	9918.33	28189.5	17836	22826	23297.5	21814.8	21595.3	22238.4	21319.8	0.962093	0.892879	0.893779	0.957611	-0.0145899	-0.0608597	-0.0185234	0.0277464	UNCHANGED	UNCHANGED	UNCHANGED	UNCHANGED
A0A445AYN0	3	403.13	TIP120 domain-containing protein	cullin-associated NEDD8-dissociated protein 1	P:cellular protein modification process; P:cellular component organization;	23203.5	52571.7	48842	48413	33764.5	43538.7	18166.5	35356.7	62354	46868	53464	45342	41539.1	41905.4	38625.7	48558	0.973034	0.490535	0.252205	0.862937	0.0126674	0.330147	0.212573	-0.104907	UNCHANGED	UNCHANGED	UNCHANGED	UNCHANGED
A0A444YFW7	7	1576.03	Uncharacterized protein	oxygen-dependent coproporphyrinogen-III oxidase, chloroplastic	P:biosynthetic process; P:cellular process;	138036	178992	162812	166088	152530	159886	116224	156670	130687	159360	179838	158991	159947	159501	134527	166063	0.973367	0.0826366	0.454218	0.204558	-0.00402245	0.303835	0.0581632	-0.249694	UNCHANGED	UNCHANGED	UNCHANGED	UNCHANGED
A0A445DY80	6	1788.75	Uncharacterized protein	probable 3-hydroxyisobutyrate dehydrogenase-like 1, mitochondrial	P:metabolic process	129122	118470	136267	138379	116781	129545	97128	88583	79447.7	94177.7	91030.7	102261	127953	128235	88386.2	95823.1	0.97396	0.28996	0.0103265	0.00552333	0.00317861	0.116552	-0.420347	-0.533721	UNCHANGED	UNCHANGED	UNCHANGED	UNCHANGED
A0A445BQ62	32	4487.68	Uncharacterized protein	heat shock 70 kDa protein 15-like	P:metabolic process;	116939	131407	124252	132935	122045	118218	92098.6	128457	107697	139816	136608	172230	124199	124399	109418	149551	0.975323	0.0607635	0.108285	0.26197	0.0023197	0.450793	0.265659	-0.182815	UNCHANGED	UNCHANGED	UNCHANGED	UNCHANGED
A0A445EBY1	3	4628.44	Small nuclear ribonucleoprotein Sm D3	small nuclear ribonucleoprotein SmD3b	P:nucleobase-containing compound metabolic process; P:cellular component organization;	86800.5	130826	180197	122656	145372	127500	49024.5	61190.5	174335	160666	204243	168664	132608	131843	94850	177858	0.97939	0.119844	0.0378966	0.476869	-0.00835049	0.907005	0.431907	-0.483448	UNCHANGED	UNCHANGED	UNCHANGED	UNCHANGED
A0A445D768	3	3729.29	Cytochrome b559 subunit alpha	photosystem II cytochrome b559 alpha subunit	P:generation of precursor metabolites and energy; P:photosynthesis; P:protein metabolic process;	132056	381898	169151	281205	214369	180837	149027	195428	196852	142536	153001	377276	227702	225470	180436	224271	0.979896	0.604823	0.989038	0.583727	-0.014209	0.313758	-0.00769454	-0.335661	UNCHANGED	UNCHANGED	UNCHANGED	UNCHANGED
A0A444ZFB4	5	1118.45	Importin subunit alpha	importin subunit alpha-2	P:transport;	120771	99981.1	24942.4	93444.6	75834.2	74376.4	76689.7	78382.7	81816.2	92937.1	88181.9	13429.4	81898	81218.4	78962.9	64849.5	0.982864	0.613322	0.56973	0.924621	-0.012022	-0.28408	-0.324712	-0.0526543	UNCHANGED	UNCHANGED	UNCHANGED	UNCHANGED
A0A444YIZ9	11	2612.26	AA_TRNA_LIGASE_II domain-containing protein	proline--tRNA ligase, cytoplasmic	P:nucleobase-containing compound metabolic process; P:translation;	60131.7	66405.3	80893.3	67066.3	64593	75363.7	63311.7	83734	70700.7	64186	71705.7	83657	69143.4	69007.7	72582.1	73182.9	0.985364	0.945331	0.557822	0.708734	-0.00283582	0.0118923	0.0847497	0.0700215	UNCHANGED	UNCHANGED	UNCHANGED	UNCHANGED
A0A444Z225	16	8096.85	Formate dehydrogenase, mitochondrial	formate dehydrogenase, mitochondrial isoform X1	P:catabolic process; P:cellular process;	445791	495785	814636	534377	633601	593385	389737	410353	399052	567100	516341	527297	585404	587121	399714	536912	0.989183	0.00115154	0.199271	0.183704	0.0042258	0.425719	-0.128971	-0.550464	UNCHANGED	UNCHANGED	UNCHANGED	UNCHANGED
A0A445CRE7	3	961.588	Phos_pyr_kin domain-containing protein	pyridoxal kinase isoform X1	P:biosynthetic process;	13344	14226.7	17945.7	16248.5	13654.7	15545	15651.3	6914	17776	11209.7	12857	16623.7	15172.1	15149.4	13447.1	13563.4	0.989407	0.976358	0.423208	0.657736	-0.00216224	0.0124273	-0.159536	-0.174126	UNCHANGED	UNCHANGED	UNCHANGED	UNCHANGED
A0A445D336	2	385.019	Uncharacterized protein	proteasome subunit beta type-7-B	P:catabolic process; P:cellular process; P:protein metabolic process;	114512	57633.5	18503	57880	59633.5	72110.5	90648	84844.5	45187	86354	116439	78375.5	63549.5	63208	73559.8	93722.8	0.990928	0.33459	0.0699977	0.765259	-0.00777361	0.349482	0.568293	0.211037	UNCHANGED	UNCHANGED	UNCHANGED	UNCHANGED
A0A445BDW2	11	1206.99	Uncharacterized protein	formate--tetrahydrofolate ligase	P:nucleobase-containing compound metabolic process; P:biosynthetic process;	233429	175048	81175	164838	187751	135679	155574	355749	115645	244596	187280	195737	163217	162756	208989	209204	0.992619	0.997886	0.11778	0.624744	-0.00408034	0.00148544	0.362202	0.356636	UNCHANGED	UNCHANGED	UNCHANGED	UNCHANGED
A0A444ZPW4	2	667.477	Uncharacterized protein	chaperone protein ClpB3, chloroplastic	P:response to stress; P:response to abiotic stimulus; P:cellular process; P:protein metabolic process;	8032	26345	31526	19602	28223	17872.5	10978	15426.5	48705	24808	28473	43422	21967.7	21899.2	25036.5	32234.3	0.993424	0.614406	0.188719	0.835774	-0.00450567	0.364565	0.557722	0.188651	UNCHANGED	UNCHANGED	UNCHANGED	UNCHANGED
A0A445E5C3	8	8361.59	Uncharacterized protein	40S ribosomal protein S28	P:translation;	118682	165522	170483	167304	139373	148315	107022	135432	149450	165801	138161	197695	151563	151664	130635	167219	0.995873	0.160263	0.460467	0.368997	0.000965794	0.356205	0.140862	-0.214376	UNCHANGED	UNCHANGED	UNCHANGED	UNCHANGED
A0A445DAI2	27	3669.79	SWIM-type domain-containing protein	Aldo/keto reductase	P:metabolic process;	121762	100762	158191	188906	176394	195288	109356	97766.9	85816.7	124308	120815	119157	126905	186863	97646.6	121427	0.0274512	0.026899	0.000340757	0.181309	0.558231	0.314445	-0.621891	-0.378105	UNCHANGED	UNCHANGED	DOWN	UNCHANGED
A0A444Y659	14	5682.02	Uncharacterized protein	heat shock cognate 70 kDa protein-like	P:response to stress; P:response to abiotic stimulus; P:cellular process; P:response to chemical;	24317.1	23517.4	16611.4	31776.6	35877.9	24800.5	29303.3	17878.3	24937.4	20338.3	19520.7	18592.6	21482	30818.4	24039.7	19483.9	0.0826924	0.247391	0.0257353	0.56932	0.520662	-0.303136	-0.66151	0.162288	UNCHANGED	UNCHANGED	DOWN	UNCHANGED
A0A445DW87	3	1832.37	Uncharacterized protein	thiol protease aleurain-like	P:catabolic process; P:cellular process; P:protein metabolic process;	433177	412239	907507	409553	377515	344255	196464	194524	207199	232382	207130	244499	584308	377108	199396	228004	0.272078	0.0706863	0.0024028	0.0760292	-0.631753	0.193422	-0.72592	-1.55109	UNCHANGED	UNCHANGED	DOWN	UNCHANGED
A0A445BWT0	41	16296.1	Uncharacterized protein	aconitate hydratase, cytoplasmic	P:generation of precursor metabolites and energy;	215749	431713	438820	423413	475173	473941	140522	148980	184652	220199	230245	211301	362094	457509	158051	220581	0.273106	0.0127825	0.000188606	0.0518503	0.337436	0.480918	-1.05249	-1.19597	UNCHANGED	UNCHANGED	DOWN	UNCHANGED
A0A445CNU0	7	5774.87	Proteasome subunit beta	proteasome subunit beta type-4	P:catabolic process; P:cellular process; P:protein metabolic process; P:response to chemical;	178456	149063	118462	134582	126314	116509	157861	74718.8	109310	69243.7	80353.4	86142.7	148661	125802	113963	78579.9	0.275006	0.224002	0.00279828	0.307428	-0.240871	-0.536337	-0.678919	-0.383453	UNCHANGED	UNCHANGED	DOWN	UNCHANGED
A0A444Z767	15	13175.5	Aminotran_1_2 domain-containing protein	glutamate--glyoxylate aminotransferase 2	P:biosynthetic process	482444	119414	127228	464920	392001	341424	284807	275695	478610	188742	179608	292326	243029	399448	346371	220226	0.278926	0.169645	0.0244352	0.492033	0.716882	-0.653335	-0.859027	0.511191	UNCHANGED	UNCHANGED	DOWN	UNCHANGED
A0A444XGU2	25	3858.86	Lipoxygenase	linoleate 9S-lipoxygenase	P:lipid metabolic process; P:biosynthetic process; P:cellular process	21538.7	48038.8	56393.9	55759.6	49334.3	62016.1	20849	31102.8	25226.9	19000	26734.2	23140.7	41990.5	55703.3	25726.2	22958.3	0.285251	0.497857	0.00158096	0.210566	0.407702	-0.164226	-1.27875	-0.706821	UNCHANGED	UNCHANGED	DOWN	UNCHANGED
A0A444XDE6	10	3773.97	Lipoxygenase	seed linoleate 9S-lipoxygenase-3	P:lipid metabolic process; P:biosynthetic process; P:cellular process;	50682.9	72654.7	113550	108059	108556	81925.6	28247.8	41641.2	38337.6	53025.8	52456.4	53841.7	78962.6	99513.4	36075.5	53108	0.370996	0.0136165	0.00620875	0.0853026	0.333721	0.557907	-0.905963	-1.13015	UNCHANGED	UNCHANGED	DOWN	UNCHANGED
A0A445AFM7	7	1782.24	S-(hydroxymethyl)glutathione dehydrogenase	alcohol dehydrogenase class-3	P:generation of precursor metabolites and energy; P:catabolic process; P:response to chemical;	96300.9	155670	182095	134746	125794	119991	106605	177764	106507	61973.3	66759.8	112379	144688	126844	130292	80370.8	0.526109	0.15651	0.0490621	0.699842	-0.1899	-0.697004	-0.658306	-0.151202	UNCHANGED	UNCHANGED	DOWN	UNCHANGED
A0A445E9E3	2	790.658	PPC domain-containing protein	AT-hook motif nuclear-localized protein 7-like		51266.5	84695	22234	65679	64722	55498	7635	11418	14065	14170	18338	11185	52731.8	61966.3	11039.3	14564.3	0.640985	0.275048	0.000250542	0.0831109	0.23281	0.399787	-2.08904	-2.25602	UNCHANGED	UNCHANGED	DOWN	UNCHANGED
A0A445C6F7	5	6037.67	DUF1082 domain-containing protein	ATPase subunit 8		129947	122614	232894	148225	158879	128475	96085.7	72657	178128	80702	117852	78909.7	161818	145193	115624	92487.9	0.674013	0.538118	0.0273014	0.389033	-0.156403	-0.322099	-0.650636	-0.48494	UNCHANGED	UNCHANGED	DOWN	UNCHANGED
A0A445DEQ9	12	5568.41	Peroxidase	cationic peroxidase 1	P:response to stress; P:catabolic process; P:cellular process; P:response to chemical;	195017	77562.4	53223.3	96331.6	98055.6	77757.6	53790.8	31416.9	20892.2	39492.5	43692.5	43979.9	108601	90714.9	35366.6	42388.3	0.706773	0.513614	0.00191265	0.177738	-0.259626	0.261278	-1.09767	-1.61858	UNCHANGED	UNCHANGED	DOWN	UNCHANGED
A0A445DYX7	3	780.65	Protein kinase domain-containing protein	receptor-like protein kinase THESEUS 1	P:cellular protein modification process;	167425	214707	734328	202841	417957	306198	179503	139745	218404	128179	133436	120215	372154	308999	179217	127276	0.758624	0.0871306	0.0432425	0.351253	-0.268297	-0.493745	-1.27964	-1.05419	UNCHANGED	UNCHANGED	DOWN	UNCHANGED
A0A445EHF2	6	1536.4	Pectinesterase	pectinesterase	P:carbohydrate metabolic process; P:catabolic process; P:cellular component organization;	29537.5	27705.7	17648.7	28472.2	27004.4	20760.5	19193.3	19853	18701.5	18632.4	13335.2	13610.9	24964	25412.4	19249.3	15192.8	0.923518	0.0817481	0.0250255	0.198385	0.0256814	-0.341412	-0.742138	-0.375045	UNCHANGED	UNCHANGED	DOWN	UNCHANGED
A0A445E8M7	9	8212.22	Ribosomal_S7 domain-containing protein	40S ribosomal protein S5	P:translation;	36818.3	36866.3	36638.6	22777.4	26535.5	25514.3	18012.9	21899.5	23133.3	19451.7	23501.6	21727.3	36774.4	24942.4	21015.2	21560.2	0.00046071	0.792449	0.10548	0.000519711	-0.560101	0.0369371	-0.21023	-0.807268	UNCHANGED	UNCHANGED	UNCHANGED	DOWN
A0A444ZP19	7	1573.77	Serine hydroxymethyltransferase	serine hydroxymethyltransferase 3, chloroplastic	P:biosynthetic process; P:cellular process	150288	142449	132082	108477	107222	101572	83642.6	93301.2	95113.7	100973	94845.3	95449.4	141606	105757	90685.9	97089.3	0.00323171	0.189814	0.0396825	0.00132157	-0.421132	0.0984338	-0.123371	-0.642937	UNCHANGED	UNCHANGED	UNCHANGED	DOWN
A0A445EU47	2	604.747	Chitin-binding type-1 domain-containing protein	endochitinase	P:carbohydrate metabolic process; P:catabolic process; P:cellular process	160385	186090	189390	127305	123098	116116	32190	53077.5	40418.5	73034.5	86245.5	152200	178622	122173	41895.3	103827	0.00439272	0.0700759	0.498899	0.000240705	-0.547979	1.30932	-0.234752	-2.09205	UNCHANGED	UNCHANGED	UNCHANGED	DOWN
A0A445BXR7	19	5771.06	Uncharacterized protein	heat shock cognate 70 kDa protein-like	P:response to stress; P:response to abiotic stimulus; P:cellular process; P:response to chemical;	44134.2	42682.9	38536	33320.4	32335.7	27903.3	28660.3	26477.5	26753.3	27655.3	29167	24943.8	41784.4	31186.4	27297	27255.4	0.0109662	0.977909	0.130945	0.00132777	-0.422044	-0.00220211	-0.194378	-0.614221	UNCHANGED	UNCHANGED	UNCHANGED	DOWN
A0A445B037	16	4493.1	Aldedh domain-containing protein	probable aldehyde dehydrogenase isoform X1	P:response to stress; P:catabolic process; P:response to abiotic stimulus; P:cellular process;	219727	232601	253271	271181	276504	269706	181598	124657	147604	211533	235558	230410	235200	272464	151287	225834	0.0202665	0.0145767	0.00355852	0.0119852	0.212178	0.577976	-0.270805	-0.636602	UNCHANGED	UNCHANGED	UNCHANGED	DOWN
A0A445DB36	5	2770.73	Uncharacterized protein	UDP-arabinopyranose mutase 1	P:nucleobase-containing compound metabolic process;	99871	101802	63239	63443.4	51372.2	55873.8	47106.2	28842.8	46965	48556.1	38799.1	41747.2	88304	56896.5	40971.3	43034.1	0.073521	0.774107	0.0382868	0.0273536	-0.634139	0.070866	-0.402858	-1.10786	UNCHANGED	UNCHANGED	UNCHANGED	DOWN
A0A445BDT8	2	975.29	Beta-hexosaminidase	beta-hexosaminidase 1	P:carbohydrate metabolic process	109928	101828	148111	99082	79645.5	60855	75393	72976.5	73592.5	73814.5	57704	96618	119955	79860.8	73987.3	76045.5	0.0903568	0.864474	0.820913	0.0323728	-0.586937	0.0395846	-0.0706252	-0.697147	UNCHANGED	UNCHANGED	UNCHANGED	DOWN
A0A444XRR8	27	6528.38	Uncharacterized protein	chaperonin CPN60-2, mitochondrial	P:transport; P:cellular component organization;	209088	241663	190476	190230	184592	175447	117711	117871	114344	134641	137437	125143	213742	183423	116642	132407	0.123282	0.0154969	0.000857383	0.00293642	-0.220696	0.182894	-0.470194	-0.873785	UNCHANGED	UNCHANGED	UNCHANGED	DOWN
A0A444XQF7	6	6226.56	PAP_fibrillin domain-containing protein	plastid-lipid-associated protein 6, chloroplastic		105005	77706.7	80384.7	81475.7	57599.9	39639.2	45752.2	34733	56688.6	55400.2	69773.4	52200.8	87698.9	59571.6	45724.6	59124.8	0.132286	0.18293	0.974751	0.0174946	-0.557935	0.370793	-0.0108604	-0.939588	UNCHANGED	UNCHANGED	UNCHANGED	DOWN
A0A445D7V0	2	367.928	Pectinesterase	pectinesterase	P:carbohydrate metabolic process; P:catabolic process; P:cellular component organization;	76283.8	64017	77834.6	65715.9	57341.3	67569.1	59581	37559.4	35290.2	48235.8	51201.6	64108.6	72711.8	63542.1	44143.5	54515.3	0.163817	0.320388	0.194609	0.0325277	-0.194476	0.304461	-0.22105	-0.719988	UNCHANGED	UNCHANGED	UNCHANGED	DOWN
A0A445DW96	12	8088.54	Aldedh domain-containing protein	aldehyde dehydrogenase family 7 member A1	P:metabolic process	111143	158546	126062	238613	131577	193996	92748.3	49677.7	69581	113103	116604	73010.7	131917	188062	70669	100906	0.174503	0.181568	0.0626372	0.0307732	0.51158	0.513861	-0.8982	-0.900481	UNCHANGED	UNCHANGED	UNCHANGED	DOWN
A0A445BZV8	2	425.033	Uncharacterized protein	benzyl alcohol O-benzoyltransferase		829298	700359	1.07682e+06	646128	600752	826033	413362	216120	387213	371162	654362	669175	868827	690971	338898	564900	0.243474	0.120853	0.348731	0.0138515	-0.330444	0.737142	-0.29063	-1.35822	UNCHANGED	UNCHANGED	UNCHANGED	DOWN
A0A445CZ04	9	5633.53	HATPase_c domain-containing protein	Heat shock protein Hsp90	P:cellular process	63403.9	65900.1	78295.2	69279.6	97917.7	78646	44302	39091.3	47205.9	69599.6	72933.1	50039.5	69199.7	81947.8	43533.1	64190.7	0.255153	0.051628	0.183277	0.00773573	0.243939	0.560253	-0.352341	-0.668655	UNCHANGED	UNCHANGED	UNCHANGED	DOWN
A0A444XU44	2	2419.81	Glyco_hydro_18 domain-containing protein	hevamine-A	P:carbohydrate metabolic process;	220129	188784	167525	167371	227080	82026	29803	60433	108331	46668	31121	54417	192146	158826	66189	44068.7	0.498139	0.406274	0.0546007	0.0101662	-0.274759	-0.586838	-1.84962	-1.53754	UNCHANGED	UNCHANGED	UNCHANGED	DOWN
A0A445BZL2	3	4819.82	Uncharacterized protein	MLP-like protein 34	P:response to stress	241334	231624	359537	234390	238681	270503	151393	152586	147313	150554	236710	204510	277498	247858	150431	197258	0.525462	0.1365	0.14062	0.0366373	-0.162963	0.390987	-0.329432	-0.883382	UNCHANGED	UNCHANGED	UNCHANGED	DOWN
A0A445DWR8	24	8259.3	Uncharacterized protein	cell division cycle protein 48 homolog	P:transport; P:response to stress; P:cell cycle; P:catabolic process; P:cellular component organization; P:protein metabolic process; P:response to chemical;	15348.5	18336.7	16218.8	11913.6	11721.1	20554.1	7039.66	8705.63	9817.01	8900.09	7061.61	7439.81	16634.7	14729.6	8520.77	7800.5	0.565468	0.504196	0.0797274	0.00249104	-0.175476	-0.127416	-0.917079	-0.965138	UNCHANGED	UNCHANGED	UNCHANGED	DOWN
A0A444Y8L6	2	837.093	Uncharacterized protein	alcohol dehydrogenase 1	P:catabolic process; P:cellular process; P:response to chemical;	405352	387788	337859	241992	484742	251122	261801	137853	121218	202827	221754	248080	377000	325952	173624	224220	0.567191	0.335421	0.275031	0.0140007	-0.209904	0.368952	-0.539741	-1.1186	UNCHANGED	UNCHANGED	UNCHANGED	DOWN
A0A445BR12	2	385.656	Uncharacterized protein	glucose-1-phosphate adenylyltransferase large subunit 1 isoform X1	P:carbohydrate metabolic process; P:generation of precursor metabolites and energy; P:biosynthetic process;	155264	146950	257472	278093	245445	127594	95205	59328.7	76543.4	116217	112860	91403.3	186562	217044	77025.7	106827	0.62639	0.0828413	0.0762173	0.0415868	0.218332	0.47186	-1.02272	-1.27624	UNCHANGED	UNCHANGED	UNCHANGED	DOWN
A0A445AYA2	2	548.715	ATP-dependent 6-phosphofructokinase	ATP-dependent 6-phosphofructokinase 2	P:carbohydrate metabolic process; P:generation of precursor metabolites and energy; P:nucleobase-containing compound metabolic process; P:catabolic process;	69238.1	73820	93178.4	73151.4	67321.3	87119.1	48119.2	44864.8	52021	67815.8	68301.5	80060.3	78745.5	75863.9	48335	72059.2	0.774438	0.00623278	0.620846	0.0162722	-0.0537844	0.576115	-0.0742308	-0.70413	UNCHANGED	UNCHANGED	UNCHANGED	DOWN
A0A444YYV3	8	1134.05	Uncharacterized protein	2-hydroxyacyl-CoA lyase	P:lipid metabolic process; P:catabolic process; P:cellular process;	129234	113994	159029	121591	128227	146040	70124.7	68206.7	100605	87153.3	135325	117242	134086	131953	79645.4	113240	0.894523	0.127896	0.302694	0.0321406	-0.0231369	0.507718	-0.220637	-0.751492	UNCHANGED	UNCHANGED	UNCHANGED	DOWN
A0A444ZZV5	11	1380.23	Biotin carboxylase	biotin carboxylase 2, chloroplastic	P:nucleobase-containing compound metabolic process; P:lipid metabolic process; P:biosynthetic process	42959.3	50847.1	44039.4	66780.8	61098.1	68608.3	23933.2	25882.2	23794.8	29064.9	33470.8	33004.3	45948.6	65495.7	24536.7	31846.7	0.00429002	0.00922693	0.000224247	0.00111623	0.51138	0.3762	-1.04026	-0.905077	UNCHANGED	UNCHANGED	DOWN	DOWN
A0A444ZCE6	16	3323.21	Elongation factor Tu	elongation factor Tu, mitochondrial		42026.1	42289.2	37553.3	47497	52589.9	50745.9	18454.9	14502	25071.7	13268	14199.3	13096.4	40622.9	50277.6	19342.9	13521.2	0.0107194	0.133816	1.76979e-05	0.0034893	0.307622	-0.516578	-1.89469	-1.07049	UNCHANGED	UNCHANGED	DOWN	DOWN
A0A444YFQ5	25	8353.29	Glucose-1-phosphate adenylyltransferase	glucose-1-phosphate adenylyltransferase small subunit 2, chloroplastic	P:carbohydrate metabolic process; P:generation of precursor metabolites and energy; P:biosynthetic process;	197718	223110	286681	360849	373346	275990	130256	147326	154974	221992	233907	198353	235836	336728	144185	218084	0.0671303	0.00440451	0.0213692	0.0288611	0.513799	0.596958	-0.626702	-0.709861	UNCHANGED	UNCHANGED	DOWN	DOWN
A0A444Y023	3	2839.44	Uncharacterized protein	protein FAR1-RELATED SEQUENCE 5-like	P:nucleobase-containing compound metabolic process; P:biosynthetic process;	45262.9	70231.8	59777.5	46374.5	38431.7	38327.5	18306	24932.8	36526.3	20168.6	14343	20383.2	58424.1	41044.5	26588.4	18298.3	0.0873726	0.218208	0.00237379	0.0239593	-0.509373	-0.539087	-1.16548	-1.13577	UNCHANGED	UNCHANGED	DOWN	DOWN
A0A444ZBQ0	10	3761.39	Uncharacterized protein	selenium-binding protein 1	P:cellular protein modification process	101869	113460	91131.7	123728	115659	108164	65537.3	47820.3	56388	76243.7	81215.6	70582	102153	115850	56581.9	76013.8	0.156312	0.0311791	0.00185479	0.00519975	0.181523	0.425921	-0.607928	-0.852326	UNCHANGED	UNCHANGED	DOWN	DOWN
A0A445D3G8	3	1988.74	Malic_M domain-containing protein	NADP-dependent malic enzyme	P:metabolic process; P:cellular process;	285209	365774	323927	355660	291514	253376	70303.1	85454.4	181355	102886	187752	132914	324970	300183	112371	141184	0.548192	0.537099	0.0149196	0.00707033	-0.114463	0.329314	-1.08826	-1.53204	UNCHANGED	UNCHANGED	DOWN	DOWN
A0A444ZSR4	10	1664.85	Eukaryotic translation initiation factor 3 subunit I	eukaryotic translation initiation factor 3 subunit I-like	P:cellular component organization;	643292	469191	417820	629885	343289	627880	68434.7	87478	92018.7	113515	85309.3	94027	510101	533684	82643.8	97617.1	0.850245	0.24624	0.0103147	0.00338021	0.065204	0.240228	-2.45078	-2.6258	UNCHANGED	UNCHANGED	DOWN	DOWN
A0A445C543	9	8901.27	Peroxidase	peroxidase P7-like	P:response to stress; P:catabolic process; P:cellular process; P:response to chemical;	132235	134853	125753	41107	33129.6	32648.8	256385	138237	117856	53035.9	91381.6	99021.3	130947	35628.5	170826	81146.3	1.58309e-05	0.119829	0.0347967	0.408844	-1.87788	-1.07393	1.1875	0.383547	DOWN	UNCHANGED	UP	UNCHANGED
A0A445DT01	3	792.638	Uncharacterized protein	patellin-3		85338.6	77160	91164.5	33039.6	27183	28748.4	68879.7	96093.1	87129.2	104234	101788	98640.4	84554.4	29657	84034	101554	0.000242226	0.0985594	7.20566e-06	0.956562	-1.51151	0.273205	1.77581	-0.0089058	DOWN	UNCHANGED	UP	UNCHANGED
A0A445CE34	7	1299.1	Glucose-1-phosphate adenylyltransferase	glucose-1-phosphate adenylyltransferase large subunit 1	P:carbohydrate metabolic process; P:generation of precursor metabolites and energy; P:biosynthetic process;	36816	32662	40750.1	8142.43	8338.85	5785.42	29228.3	39076	31598	26530.6	27193.6	25840.1	36742.7	7422.23	33300.7	26521.5	0.000290696	0.0862085	3.02823e-05	0.413593	-2.30753	-0.328394	1.83724	-0.141903	DOWN	UNCHANGED	UP	UNCHANGED
A0A445CR15	12	4302.37	Uncharacterized protein	triosephosphate isomerase, chloroplastic	P:carbohydrate metabolic process; P:generation of precursor metabolites and energy; P:nucleobase-containing compound metabolic process; P:catabolic process; P:biosynthetic process;	198123	174562	193967	101422	103644	80619.2	214147	243061	181757	157685	144735	157462	188884	95228.2	212988	153294	0.000817012	0.0305885	0.00239139	0.27632	-0.98804	-0.47447	0.686842	0.173273	DOWN	UNCHANGED	UP	UNCHANGED
A0A445B5D2	2	951.861	Glutamine amidotransferase type-1 domain-containing protein	carbamoyl-phosphate synthase small chain, chloroplastic	P:nucleobase-containing compound metabolic process; P:biosynthetic process;	59385.5	67584.5	64712	10281	25877.5	19143	64708.5	68891	56270.5	49457.5	48504.5	39172.5	63894	18433.8	63290	45711.5	0.00088573	0.0238329	0.00812268	0.897931	-1.79332	-0.46942	1.3102	-0.0137029	DOWN	UNCHANGED	UP	UNCHANGED
A0A445ENA2	17	25970	Uncharacterized protein	heat shock 70 kDa protein	P:response to stress; P:response to abiotic stimulus; P:cellular process; P:response to chemical;	87167.9	98689.9	122372	28673.4	23880.3	20563.9	92952.7	51405	97538.6	101752	141173	94254.9	102743	24372.6	80632.1	112393	0.00180172	0.199125	0.00395162	0.285795	-2.07572	0.479129	2.20523	-0.349618	DOWN	UNCHANGED	UP	UNCHANGED
A0A444YGN2	3	419.641	Glutathione reductase	glutathione reductase, chloroplastic	P:generation of precursor metabolites and energy; P:photosynthesis; P:cellular homeostasis; P:response to chemical;	53404.3	65154.7	65783.5	29946.5	34869	29724.5	53810.3	61181.7	62088.3	51422.5	59266	57418	61447.5	31513.3	59026.8	56035.5	0.00236071	0.444757	0.00107503	0.640814	-0.963392	-0.0750285	0.830379	-0.0579847	DOWN	UNCHANGED	UP	UNCHANGED
A0A444ZDX1	33	30878.6	Tubulin beta chain	tubulin beta chain	P:cell cycle; P:cellular component organization;	404862	352686	410505	257477	235590	212600	371138	324775	286612	396310	380530	360515	389351	235222	327508	379118	0.00238012	0.12375	0.000971657	0.113318	-0.727047	0.211117	0.688625	-0.249539	DOWN	UNCHANGED	UP	UNCHANGED
A0A445D168	16	5833.59	Glutamate decarboxylase	glutamate decarboxylase-like	P:catabolic process; P:cellular process;	199115	178144	214738	129274	130023	110838	176662	183846	199314	201673	183675	245028	197332	123379	186607	210126	0.00387448	0.292028	0.0107873	0.440342	-0.677537	0.171246	0.768161	-0.0806222	DOWN	UNCHANGED	UP	UNCHANGED
A0A445BU13	22	21902.2	Tubulin alpha chain	tubulin alpha chain	P:reproduction; P:cell cycle; P:post-embryonic development; P:cellular component organization; P:cell growth; P:cell differentiation;	297469	254077	312294	181800	131127	141260	355250	327573	303748	331826	309829	295495	287947	151396	328857	312383	0.00425807	0.417759	0.00100935	0.149192	-0.927475	-0.0741416	1.04499	0.191658	DOWN	UNCHANGED	UP	UNCHANGED
A0A444Y8R8	15	7214.17	PfkB domain-containing protein	probable fructokinase-4	P:carbohydrate metabolic process;	402277	328120	410629	231811	177120	208155	426141	396301	385329	394480	375559	388602	380342	205696	402590	386214	0.00467799	0.289186	0.000424633	0.484601	-0.886786	-0.0599141	0.908887	0.0820158	DOWN	UNCHANGED	UP	UNCHANGED
A0A445E3R9	12	3298.28	Uncharacterized protein	glutamate-1-semialdehyde 2,1-aminomutase, chloroplastic	P:nucleobase-containing compound metabolic process; P:biosynthetic process;	193795	154086	169988	89210	91269.7	50637.7	149881	184116	198289	144774	140814	119323	172623	77039.1	177429	134970	0.00551158	0.0607554	0.0197404	0.807124	-1.16396	-0.394598	0.808978	0.0396172	DOWN	UNCHANGED	UP	UNCHANGED
A0A445DCB5	2	922.734	DAHP_synth_1 domain-containing protein	2-dehydro-3-deoxyphosphooctonate aldolase	P:biosynthetic process;	25606	20710	20844	13028	12133.5	8798	39508	22323	22609	19494	20970	17333	22386.7	11319.8	28146.7	19265.7	0.00581212	0.199135	0.00882375	0.384575	-0.983787	-0.546932	0.767179	0.330324	DOWN	UNCHANGED	UP	UNCHANGED
A0A445EAT1	8	9351.67	Chlorophyll a-b binding protein, chloroplastic	chlorophyll a-b binding protein CP29.2, chloroplastic	P:generation of precursor metabolites and energy; P:cellular protein modification process; P:response to light stimulus; P:photosynthesis;	507303	539000	494367	329069	300895	187875	642239	625910	678382	455575	455776	448949	513557	272613	648844	453433	0.00593156	0.00023748	0.0138558	0.002682	-0.913669	-0.516981	0.734036	0.337347	DOWN	UNCHANGED	UP	UNCHANGED
A0A445BBW8	7	2678.66	14_3_3 domain-containing protein	14-3-3-like protein C	P:metabolic process	129338	138243	153145	97975.6	69070	67590.9	106731	60030.5	140647	128052	112150	156218	140242	78212.2	102469	132140	0.00682639	0.328525	0.0293782	0.196222	-0.84245	0.366872	0.756599	-0.452723	DOWN	UNCHANGED	UP	UNCHANGED
A0A445D9Q8	3	2059.44	Uncharacterized protein	hsp70-Hsp90 organizing protein 3-like		314448	276261	383596	170274	165237	172332	291734	336346	307613	252396	248726	283653	324768	169281	311898	261592	0.00782322	0.0424858	0.00121445	0.72439	-0.939992	-0.253758	0.627897	-0.0583374	DOWN	UNCHANGED	UP	UNCHANGED
A0A444ZW26	4	1454.59	Glutamine synthetase	glutamine synthetase nodule isozyme	P:biosynthetic process; P:cellular process;	122440	95805.6	118066	73890.4	71050.3	67350.6	99215.2	124836	95640.3	116953	121367	94185.8	112104	70763.8	106564	110835	0.00812524	0.749156	0.00971734	0.676968	-0.663752	0.0566985	0.647332	-0.0731182	DOWN	UNCHANGED	UP	UNCHANGED
A0A444ZB98	5	500.356	Uncharacterized protein	protein argonaute 4	P:metabolic process; P:cellular process	36948	54090.3	53972.2	23411.5	20052.4	19802.4	29091.3	45600.4	46631.4	34900.4	40986.7	38594.2	48336.8	21088.7	40441	38160.4	0.00939099	0.721087	0.00128776	0.381932	-1.19665	-0.0837438	0.855604	-0.257303	DOWN	UNCHANGED	UP	UNCHANGED
A0A445D4N7	8	12014.3	Chlorophyll a-b binding protein, chloroplastic	chlorophyll a-b binding protein CP26, chloroplastic	P:generation of precursor metabolites and energy; P:cellular protein modification process; P:response to light stimulus; P:photosynthesis;	294355	339819	281671	209101	182393	132824	382714	402056	465303	318472	295237	308611	305282	174772	416691	307440	0.0101614	0.0133774	0.00472843	0.0218433	-0.804664	-0.438671	0.814828	0.448835	DOWN	UNCHANGED	UP	UNCHANGED
I6XQQ7	6	3922.84	S-adenosylmethionine synthase	S-adenosylmethionine synthase 1	P:biosynthetic process; P:cellular process;	111401	105382	141383	69825.4	38839.1	58262.8	129306	148708	117830	99268.4	90082.5	78340.5	119388	55642.4	131948	89230.5	0.0112921	0.0170389	0.0366923	0.43006	-1.1014	-0.564363	0.681351	0.144309	DOWN	UNCHANGED	UP	UNCHANGED
A0A445BEL0	2	617.774	Dihydrolipoamide acetyltransferase component of pyruvate dehydrogenase complex	dihydrolipoyllysine-residue acetyltransferase component 4 of pyruvate dehydrogenase complex, chloroplastic		48188	45751.5	53603	15237	9307	31742	56107.5	44382	47355	46449	50133.5	45463.5	49180.8	18762	49281.5	47348.7	0.0128139	0.637378	0.0140689	0.982091	-1.39028	-0.0577224	1.33551	0.00294999	DOWN	UNCHANGED	UP	UNCHANGED
A0A445E858	5	2450.42	Endoglucanase	endoglucanase 17	P:carbohydrate metabolic process; P:catabolic process; P:cellular process	22316.3	42988	40124.5	10453	5403	5591	35955.7	70615	68753	30643.3	31508.7	33166.7	35142.9	7149	58441.2	31772.9	0.0137587	0.0773058	0.000169433	0.147123	-2.29742	-0.87919	2.15198	0.733751	DOWN	UNCHANGED	UP	UNCHANGED
A0A444WYJ8	2	643.68	Amidohydro-rel domain-containing protein	allantoinase	P:nucleobase-containing compound metabolic process; P:catabolic process;	71065	61066	78789	44602.5	42976.5	26134	70193	76065.5	63439	78240	81144.5	60781.5	70306.7	37904.3	69899.2	73388.7	0.0143442	0.658917	0.0149827	0.951492	-0.891299	0.070282	0.953194	-0.00838624	DOWN	UNCHANGED	UP	UNCHANGED
A0A444Y536	2	2302.18	Flavodoxin-like domain-containing protein	probable NAD(P)H dehydrogenase (quinone) FQR1-like 1	P:metabolic process;	72332.5	62283.5	102331	23499	25527	36965.5	94277	60525.5	58030.5	59388	61624	60327	78982.3	28663.8	70944.3	60446.3	0.0168178	0.420537	0.00169702	0.656799	-1.4623	-0.231033	1.07642	-0.154843	DOWN	UNCHANGED	UP	UNCHANGED
A0A445CFC7	2	1616.95	Uncharacterized protein	vicianin hydrolase	P:carbohydrate metabolic process; P:catabolic process	32412.8	44025.5	34589.5	21899.3	21499.8	12499.8	43332.5	60836.5	46696.2	32281.6	36816.2	32810.6	37009.3	18633	50288.4	33969.5	0.0174337	0.0423852	0.0105849	0.108169	-0.99003	-0.565988	0.866382	0.442339	DOWN	UNCHANGED	UP	UNCHANGED
A0A445BFK3	15	21571.5	Uncharacterized protein	photosystem I reaction center subunit II, chloroplastic	P:photosynthesis;	244767	289697	380252	159390	151494	142938	527519	352079	536224	270268	260341	375659	304905	151274	471941	302089	0.0186381	0.0734046	0.015424	0.0811724	-1.0112	-0.643631	0.99781	0.630244	DOWN	UNCHANGED	UP	UNCHANGED
A0A444Y823	9	587.681	Uncharacterized protein	carbamoyl-phosphate synthase large chain, chloroplastic	P:metabolic process; P:cellular process;	57710.3	97884.3	94451.3	38779	36444	29606	66130.7	91845	89573.3	54760.3	58591.7	60566.3	83348.7	34943	82516.3	57972.8	0.0211779	0.043072	0.00206336	0.959118	-1.25416	-0.509304	0.730372	-0.0144794	DOWN	UNCHANGED	UP	UNCHANGED
A0A444X279	9	2410.4	Chlorophyll a-b binding protein, chloroplastic	chlorophyll a-b binding protein CP29.3, chloroplastic	P:generation of precursor metabolites and energy; P:cellular protein modification process; P:response to light stimulus; P:photosynthesis;	197726	176206	146603	114607	115679	73302.3	246827	178752	236668	172902	159982	165833	173512	101196	220749	166239	0.0237303	0.0645307	0.0107907	0.141871	-0.777883	-0.409149	0.716105	0.347372	DOWN	UNCHANGED	UP	UNCHANGED
A0A444XQQ0	12	7629.9	PAP_fibrillin domain-containing protein	plastid-lipid-associated protein 6, chloroplastic		176468	105172	139674	84124.6	70196.5	80629.7	142169	120396	115833	137898	178984	114252	140438	78316.9	126132	143711	0.0416643	0.441212	0.0278799	0.553225	-0.842539	0.188233	0.875775	-0.154996	DOWN	UNCHANGED	UP	UNCHANGED
A0A445BDM9	5	1113.68	Pyruvate carboxyltransferase domain-containing protein	2-isopropylmalate synthase 2, chloroplastic	P:biosynthetic process; P:cellular process;	18364.3	24293.7	15875.2	12982.3	11225.8	6471.5	24820	31790	28233	22896.5	17022.7	24094.9	19511.1	10226.6	28281	21338	0.042663	0.0796162	0.0191301	0.0521851	-0.931972	-0.406406	1.06111	0.535542	DOWN	UNCHANGED	UP	UNCHANGED
A0A445DLK1	7	1339.81	Uncharacterized protein	3-oxoacyl-[acyl-carrier-protein] reductase 4 isoform X1	P:lipid metabolic process; P:biosynthetic process; P:cellular process	91463.7	79746	133060	57855.3	56769	48984	23477.6	89649.1	15503.2	82090.3	100170	73022.7	101423	54536.1	42876.6	85094.3	0.0461026	0.164132	0.0224665	0.109415	-0.895104	0.988872	0.641851	-1.24212	DOWN	UNCHANGED	UP	UNCHANGED
A0A445E7W0	17	3514.53	Aminotran_1_2 domain-containing protein	LL-diaminopimelate aminotransferase, chloroplastic	P:biosynthetic process	123899	119936	115680	83469.3	76396.8	75267.1	89156	110437	107038	96050.7	105802	100995	119838	78377.8	102211	100949	0.000289342	0.86901	0.00406551	0.0658384	-0.612573	-0.0179146	0.365114	-0.229544	DOWN	UNCHANGED	UNCHANGED	UNCHANGED
A0A445DQ85	21	6651.97	Glutamate decarboxylase	glutamate decarboxylase	P:catabolic process; P:cellular process;	72158.7	77206.1	69514	45337.3	50557.6	42677.2	52720.8	58290.7	58135	46172.9	57815.7	73281.9	72959.6	46190.7	56382.1	59090.2	0.00116046	0.753837	0.190183	0.00466782	-0.659496	0.0676797	0.355316	-0.371859	DOWN	UNCHANGED	UNCHANGED	UNCHANGED
A0A445A3J6	7	3067.48	ANK_REP_REGION domain-containing protein	ankyrin repeat and zinc finger domain-containing protein 1	P:transport; P:response to stress; P:catabolic process; P:cellular process; P:protein metabolic process; P:response to chemical;	176579	173404	190233	115314	107533	89471.5	166652	188138	177830	131271	199571	138092	180072	104106	177540	156311	0.00118951	0.400515	0.0860166	0.769433	-0.790517	-0.183725	0.586364	-0.0204284	DOWN	UNCHANGED	UNCHANGED	UNCHANGED
A0A445DA67	28	48230.8	Uncharacterized protein	actin-11		297390	258595	280665	189934	185975	175207	281717	266126	228478	266161	274011	256796	278883	183705	258774	265656	0.00139651	0.699151	0.00024799	0.358233	-0.602268	0.0378681	0.532166	-0.107971	DOWN	UNCHANGED	UNCHANGED	UNCHANGED
A0A445CII9	8	718.958	Coatomer subunit beta'	coatomer subunit beta'-2 isoform X1	P:transport;	80594.5	93622.8	93658.7	55569.7	53331.4	56592.6	94800	90457.3	105958	64161.7	65836.2	88675.3	89292	55164.6	97071.9	72891.1	0.00155956	0.057522	0.0900646	0.287221	-0.694789	-0.413311	0.401999	0.120522	DOWN	UNCHANGED	UNCHANGED	UNCHANGED
A0A445BYE8	4	4511.38	Chlorophyll a-b binding protein, chloroplastic	chlorophyll a-b binding protein 13, chloroplastic	P:generation of precursor metabolites and energy; P:cellular protein modification process; P:response to light stimulus; P:photosynthesis;	390339	378302	339719	257454	246053	222394	231154	306071	375124	201626	226407	274387	369453	241967	304116	234140	0.00229245	0.208684	0.758006	0.214157	-0.610582	-0.377249	-0.0474368	-0.28077	DOWN	UNCHANGED	UNCHANGED	UNCHANGED
A0A445CLH1	2	1293.2	Proliferating cell nuclear antigen	proliferating cell nuclear antigen	P:DNA metabolic process; P:response to stress; P:biosynthetic process;	47605.5	42418	53888	25457	19596.5	21512	44380	42844.5	32970	32400.5	33254	31577.5	47970.5	22188.5	40064.8	32410.7	0.00231708	0.101152	0.00466756	0.180276	-1.11234	-0.305868	0.546657	-0.259811	DOWN	UNCHANGED	UNCHANGED	UNCHANGED
A0A445A9Q0	5	2719.42	Uncharacterized protein	ras-related protein Rab11C	P:transport; P:signal transduction;	25290.3	25378.8	21489.5	12713.3	8249.94	12508.1	16653.5	11133.4	31080.7	9303.51	8774.27	9358.05	24052.9	11157.1	19622.5	9145.28	0.00265393	0.153032	0.242061	0.506779	-1.10825	-1.10141	-0.286862	-0.293699	DOWN	UNCHANGED	UNCHANGED	UNCHANGED
A0A445A495	7	4547.01	Thiamine thiazole synthase, chloroplastic	thiamine thiazole synthase, chloroplastic	P:biosynthetic process; P:cellular process;	63751.6	53092.7	66029.8	36417.3	31380.5	28570.3	99528.5	55693.6	61252.8	34579	39126.9	38694.3	60958	32122.7	72158.3	37466.8	0.00330714	0.0664873	0.120365	0.478532	-0.924222	-0.945555	0.222017	0.24335	DOWN	UNCHANGED	UNCHANGED	UNCHANGED
A0A445BK32	11	8667.51	Cysteine synthase	cysteine synthase	P:biosynthetic process; P:cellular process;	242597	201135	224201	147496	126049	142772	291580	123957	155433	234598	225114	119303	222644	138772	190323	193005	0.00355296	0.968256	0.22187	0.573649	-0.682021	0.0201855	0.475917	-0.226289	DOWN	UNCHANGED	UNCHANGED	UNCHANGED
A0A445DVJ9	29	48791.8	Uncharacterized protein	hypothetical chloroplast RF21	P:transport; P:metabolic process;	363538	394872	410667	253988	275405	201251	317416	273734	323113	298921	289127	321311	389692	243548	304754	303120	0.00494208	0.933026	0.0680862	0.0151967	-0.67813	-0.0077595	0.315681	-0.354689	DOWN	UNCHANGED	UNCHANGED	UNCHANGED
A0A445E0E4	13	10740.6	Rieske domain-containing protein	equilibrative nucleotide transporter 3	P:transport; P:metabolic process;	49737.8	38048.1	49276.7	25111.7	24825.8	24566.4	43321.7	28539.4	59339.7	20179.7	25733	25568	45687.5	24834.6	43733.6	23826.9	0.00550168	0.0934157	0.611358	0.849883	-0.879447	-0.876149	-0.0597613	-0.0630591	DOWN	UNCHANGED	UNCHANGED	UNCHANGED
D8KXZ7	13	4910.11	Enoyl-ACP reductase 1-2	enoyl-[acyl-carrier-protein] reductase [NADH], chloroplastic-like	P:lipid metabolic process; P:biosynthetic process; P:cellular process	245276	210253	210087	146982	156301	124101	242549	241721	214353	171789	169962	146045	221872	142461	232874	162599	0.0062805	0.00482777	0.18692	0.501916	-0.639156	-0.518233	0.190747	0.0698241	DOWN	UNCHANGED	UNCHANGED	UNCHANGED
A0A445B9I7	4	2181.45	Lipase_GDSL domain-containing protein	GDSL esterase/lipase At5g14450	P:metabolic process	81535.3	86705	90926.7	49386.3	63255	37651.7	70549	66390.7	51343.7	38378.7	51857	29293.3	86389	50097.7	62761.1	39843	0.00999902	0.0593029	0.358152	0.0213544	-0.786104	-0.655545	-0.330417	-0.460977	DOWN	UNCHANGED	UNCHANGED	UNCHANGED
A0A445E514	26	7289.27	Uncharacterized protein	ruBisCO large subunit-binding protein subunit alpha	P:cellular process	206223	208196	247020	153728	108470	91059	230653	201501	168701	148685	187258	131695	220480	117753	200285	155880	0.0109701	0.141641	0.200188	0.416085	-0.904887	-0.361622	0.404674	-0.138591	DOWN	UNCHANGED	UNCHANGED	UNCHANGED
A0A445ERM0	11	1024	Elongation factor G, chloroplastic	elongation factor G-2, chloroplastic	P:cellular component organization;	36820.3	40271	52036.7	24284.3	22766.2	20320.2	52175.7	55910.8	47729.3	45553.7	44336.3	26271.3	43042.7	22456.9	51938.6	38720.4	0.0122995	0.118481	0.0623059	0.160896	-0.938608	-0.423711	0.785936	0.271039	DOWN	UNCHANGED	UNCHANGED	UNCHANGED
L7PCI4	2	1670.83	Small GTP binding protein	ras-related protein Rab7	P:transport; P:signal transduction;	92623.4	75861.2	82435.1	57183	47977.5	31976.5	79877.6	92017.4	76999	60394.8	59373.2	54403.2	83639.9	45712.3	82964.7	58057.1	0.0127032	0.0073773	0.17932	0.924627	-0.871609	-0.515025	0.344889	-0.0116946	DOWN	UNCHANGED	UNCHANGED	UNCHANGED
A0A445E7A3	3	800.282	Phenylalanine ammonia-lyase	phenylalanine ammonia-lyase	P:catabolic process; P:biosynthetic process; P:cellular process; P:secondary metabolic process;	37748	36477	51267.4	19027.6	23961.1	20574.5	31767.9	36577.2	28583.7	36561.1	40110.9	20796.8	41830.8	21187.7	32309.6	32489.6	0.0140438	0.978821	0.138114	0.145228	-0.981337	0.00801613	0.61675	-0.372603	DOWN	UNCHANGED	UNCHANGED	UNCHANGED
A0A445C8X3	5	605.184	Uncharacterized protein	phosphoenolpyruvate carboxykinase (ATP)	P:carbohydrate metabolic process; P:biosynthetic process;	26938.7	37725.9	32390.1	17799.4	20786.5	15728.7	16894.5	18090.1	28658.7	16103.1	17910.3	18614.1	32351.5	18104.9	21214.4	17542.5	0.0143978	0.389987	0.750035	0.0839393	-0.837458	-0.274191	-0.0455214	-0.608789	DOWN	UNCHANGED	UNCHANGED	UNCHANGED
A0A444YZP0	16	13834.2	Malic enzyme	NADP-dependent malic enzyme	P:metabolic process; P:cellular process;	171841	189510	224891	132659	133773	115426	183267	166914	148223	110991	111621	139162	195414	127286	166135	120591	0.0150701	0.0295142	0.576458	0.190448	-0.618463	-0.462224	-0.0779429	-0.234181	DOWN	UNCHANGED	UNCHANGED	UNCHANGED
A0A445DSZ0	2	953.789	PKS_ER domain-containing protein	Succinate-semialdehyde dehydrogenase (acetylating)	P:metabolic process	117392	93487	128834	75110	68303	66319	142012	94373	109422	112748	88029	92854.5	113238	69910.7	115269	97877.2	0.0157181	0.337235	0.0251841	0.913173	-0.695772	-0.23596	0.48546	0.0256485	DOWN	UNCHANGED	UNCHANGED	UNCHANGED
A0A444ZHU9	3	1033.5	Uncharacterized protein	transcription factor Pur-alpha 1	P:nucleobase-containing compound metabolic process; P:biosynthetic process;	31669.7	27256.7	37325.3	20702	20564	20089	39909.3	41455	35250.7	24661.5	27891.5	28393	32083.9	20451.7	38871.7	26982	0.0163487	0.00568431	0.00527264	0.121266	-0.649631	-0.526722	0.399779	0.27687	DOWN	UNCHANGED	UNCHANGED	UNCHANGED
A0A445DC80	7	1958.47	Uncharacterized protein	subtilisin-like protease Glyma18g48580	P:protein metabolic process;	223746	145452	207374	91095.7	107659	102295	198478	160076	177086	86130	89104.3	169277	192191	100350	178547	114837	0.0195403	0.0962312	0.62821	0.63134	-0.937499	-0.636713	0.19455	-0.106236	DOWN	UNCHANGED	UNCHANGED	UNCHANGED
A0A445E4X9	17	6570.36	Epimerase domain-containing protein	UDP-D-apiose/UDP-D-xylose synthase 2		266462	210434	144100	92689	63872.1	43781.3	310370	253204	181187	193615	189174	97160.1	206999	66780.8	248254	159983	0.0212109	0.14498	0.0539791	0.467602	-1.63212	-0.633897	1.26041	0.262193	DOWN	UNCHANGED	UNCHANGED	UNCHANGED
A0A444Y924	5	940.853	Phospho-2-dehydro-3-deoxyheptonate aldolase	phospho-2-dehydro-3-deoxyheptonate aldolase 1, chloroplastic-like	P:biosynthetic process; P:cellular process;	65460.7	78126.3	74616	37164.3	46663.3	57863.5	62911.7	75436.3	76883	62362	69444.5	65070.5	72734.3	47230.4	71743.7	65625.7	0.0226487	0.279247	0.0438089	0.873206	-0.622921	-0.128591	0.474545	-0.0197851	DOWN	UNCHANGED	UNCHANGED	UNCHANGED
A0A445CS70	4	1140.49	ATP-dependent Clp protease proteolytic subunit	ATP-dependent Clp protease proteolytic subunit 5, chloroplastic	P:catabolic process; P:cellular process; P:protein metabolic process;	109400	62746	96157.3	41229.7	41978.3	40138	97312	57822	92292	58751.7	51235.3	68943	89434.3	41115.3	82475.3	59643.3	0.025389	0.16435	0.0229321	0.727575	-1.12115	-0.467602	0.536684	-0.116865	DOWN	UNCHANGED	UNCHANGED	UNCHANGED
A0A444Z364	19	1487.2	Uncharacterized protein	alpha-xylosidase 1	P:carbohydrate metabolic process; P:cellular process	99442.2	58797.7	98310.9	43302.2	36883	34973.1	87438	89446.8	50776.6	82059.4	135138	63162.3	85517	38386.1	75887.2	93453.4	0.0256826	0.52011	0.064071	0.627392	-1.15563	0.300391	1.28366	-0.172355	DOWN	UNCHANGED	UNCHANGED	UNCHANGED
A0A445BYQ2	4	853.605	Aldolase_II domain-containing protein	probable bifunctional methylthioribulose-1-phosphate dehydratase/enolase-phosphatase E1	P:biosynthetic process; P:cellular process;	31134.7	34595.3	45064.7	19148.3	24876.3	17745.7	27346.3	24654.7	25976.7	20993	21994.7	27537.3	36931.6	20590.1	25992.6	23508.3	0.0257911	0.317779	0.383336	0.0620792	-0.842902	-0.144926	0.191221	-0.506756	DOWN	UNCHANGED	UNCHANGED	UNCHANGED
A0A444ZJY2	3	1010.38	Adenylosuccinate synthetase, chloroplastic	adenylosuccinate synthetase 2, chloroplastic	P:nucleobase-containing compound metabolic process; P:biosynthetic process;	53249	74588	59049	43255	36195.3	39242.7	68880	78504	68889	53206	57412	55406	62295.3	39564.3	72091	55341.3	0.0273373	0.00813158	0.00267765	0.241543	-0.654924	-0.381462	0.484157	0.210695	DOWN	UNCHANGED	UNCHANGED	UNCHANGED
A0A444XBV0	2	5193.86	40S ribosomal protein S12	40S ribosomal protein S12	P:translation;	217646	175090	189474	153880	117466	90956.5	183819	121307	109729	146688	108807	146286	194070	120767	138285	133927	0.0295078	0.876036	0.584337	0.100171	-0.684346	-0.0461978	0.149217	-0.488931	DOWN	UNCHANGED	UNCHANGED	UNCHANGED
A0A444X596	2	2222.84	Uncharacterized protein	photosystem I reaction center subunit N, chloroplastic	P:photosynthesis;	52230.5	64992.5	95891	35717	27483.5	12822	90410.5	67831.5	173602	45024.5	40193	89652	71038	25340.8	110614	58289.8	0.0351024	0.217739	0.126398	0.317404	-1.48713	-0.924224	1.20178	0.638878	DOWN	UNCHANGED	UNCHANGED	UNCHANGED
A0A445D2F3	2	436.132	Aldedh domain-containing protein	aldehyde dehydrogenase family 2 member C4 isoform X1	P:metabolic process	104693	84233.3	125304	59790.9	74797.4	55520	90494.4	63305.7	82543.8	82148	92260.8	96664	104744	63369.4	78781.3	90357.6	0.0351872	0.27421	0.0204755	0.144521	-0.725002	0.197792	0.511859	-0.410936	DOWN	UNCHANGED	UNCHANGED	UNCHANGED
A0A445BWX1	16	14722	Peroxidase	peroxidase 3	P:response to stress; P:catabolic process; P:cellular process; P:response to chemical;	690585	552153	857334	467224	411939	335768	557706	483184	484550	455623	458074	421183	700024	404977	508480	444960	0.0372886	0.0808856	0.373282	0.104686	-0.789564	-0.192515	0.135835	-0.461213	DOWN	UNCHANGED	UNCHANGED	UNCHANGED
A0A445AD29	5	3482.23	Uncharacterized protein	oxygen-evolving enhancer protein 3-2, chloroplastic	P:generation of precursor metabolites and energy; P:photosynthesis;	295637	389844	433672	250375	257272	182267	366170	272723	521120	248786	210710	525189	373051	229971	386671	328228	0.0388158	0.658819	0.389699	0.877758	-0.697921	-0.236406	0.513247	0.0517324	DOWN	UNCHANGED	UNCHANGED	UNCHANGED
A0A445B636	3	2331.13	PHB domain-containing protein	stomatin-like protein 2, mitochondrial		7846.68	5420.61	7152.95	4925.84	3187.42	4459.93	5365.58	3050.13	2157.6	9496.56	14302.2	5256.65	6806.75	4191.06	3524.44	9685.15	0.0422962	0.0911948	0.108173	0.051868	-0.699649	1.45838	1.20846	-0.949572	DOWN	UNCHANGED	UNCHANGED	UNCHANGED
A0A445DIV1	23	11272.5	Peroxidase	Peroxidase 15	P:response to stress; P:catabolic process; P:cellular process; P:response to chemical;	611251	483965	612696	359267	422376	169868	357769	471440	459764	602584	548048	458313	569304	317170	429658	536315	0.0442723	0.12665	0.0649259	0.0668811	-0.843942	0.319894	0.757824	-0.406012	DOWN	UNCHANGED	UNCHANGED	UNCHANGED
A0A444XB67	20	20562.2	Tubulin alpha chain	tubulin alpha-3 chain	P:cell cycle; P:cellular component organization;	618251	573906	855632	472014	395273	401946	576329	621672	513177	476873	459803	472872	682596	423078	570393	469849	0.0460718	0.0343869	0.135623	0.293859	-0.69011	-0.279758	0.151275	-0.259077	DOWN	UNCHANGED	UNCHANGED	UNCHANGED
A0A445ETS2	7	48206	Uncharacterized protein	ADP-ribosylation factor 1-like isoform X1	P:transport;	87734.2	86472	83258.1	54347.8	48770.5	43162.7	48847.3	53202.5	52917.8	90597.1	75594.4	65449.3	85821.4	48760.3	51655.9	77213.6	0.000446656	0.0263961	0.0235282	6.07539e-05	-0.81563	0.579923	0.663148	-0.732405	DOWN	UNCHANGED	UP	DOWN
A0A445DYP5	22	19769.9	Uncharacterized protein	dolichol kinase EVAN isoform X1	P:lipid metabolic process; P:biosynthetic process;	166959	194080	221821	120739	104403	103167	108764	100266	100421	70830.8	78494.3	81741.5	194287	109436	103150	77022.2	0.00725736	0.00365269	0.00764866	0.00478397	-0.828098	-0.421398	-0.506744	-0.913444	DOWN	UNCHANGED	UNCHANGED	DOWN
A0A444Y732	7	770.65	Uncharacterized protein	fatty acid hydroperoxide lyase, chloroplastic	P:lipid metabolic process; P:response to stress; P:cellular process;	523171	452596	437668	342370	280469	218064	241285	190879	329030	141813	118954	252624	471145	280301	253731	171131	0.0127892	0.225743	0.116648	0.0107443	-0.749195	-0.568203	-0.711879	-0.892871	DOWN	UNCHANGED	UNCHANGED	DOWN
A0A444X9W6	22	3761.95	Uncharacterized protein	Lysosomal beta glucosidase	P:carbohydrate metabolic process	88766.4	84613.6	124983	49079.2	46887.1	46413.9	55429.3	42855.4	44333.8	50880.5	59642.9	50409.3	99454.3	47460.1	47539.5	53644.2	0.0155106	0.287145	0.117883	0.0180191	-1.06732	0.174296	0.176708	-1.06491	DOWN	UNCHANGED	UNCHANGED	DOWN
A0A445BJM5	8	6949.25	Aldo_ket_red domain-containing protein	probable aldo-keto reductase 1	P:metabolic process	87034.8	68184.3	92121.1	45125.1	47826.3	59255.6	52618.9	35607.8	34787.3	65181.2	63941.2	50538.3	82446.7	50735.7	41004.7	59886.9	0.0200638	0.0647494	0.224912	0.0112601	-0.700462	0.546453	0.23924	-1.00767	DOWN	UNCHANGED	UNCHANGED	DOWN
A0A445ELZ8	2	428.151	Uncharacterized protein	dihydrolipoyl dehydrogenase 2, chloroplastic	P:generation of precursor metabolites and energy; P:cellular homeostasis	52921.5	47113	43058.5	14836	33925	11175	37094.5	27429.5	24513	24995	33749	16817	47697.7	19978.7	29679	25187	0.0219306	0.508424	0.576664	0.0193319	-1.25546	-0.236763	0.334219	-0.684476	DOWN	UNCHANGED	UNCHANGED	DOWN
A0A444XWM2	4	578.385	Ribonuclease	ribonuclease TUDOR 1	P:catabolic process;	0	0	0	0	0	0	30312.6	90336.8	49991.1	120588	71042.4	93627.6	-	-	56880.2	95086.1	-	0.168262	-	-	-	0.741309	-	-	-	UNCHANGED	Unique BA2.5_Cotyledonary	Unique BA0_Cotyledonary
A0A445AUL4	6	13777.5	Helicase C-terminal domain-containing protein	eukaryotic initiation factor 4A-6		0	0	0	0	0	0	11355.8	12730	12611.1	13246.6	13689.7	13246.4	-	-	12232.3	13394.3	-	0.0663746	-	-	-	0.130918	-	-	-	UNCHANGED	Unique BA2.5_Cotyledonary	Unique BA0_Cotyledonary
A0A445BVW9	7	1279.59	Protein disulfide-isomerase	protein disulfide isomerase-like 1-4	P:response to stress; P:cellular homeostasis;	0	0	0	0	0	0	45844.7	49202	51409.6	44391.6	55124.8	52406.8	-	-	48818.8	50641	-	0.639819	-	-	-	0.0528702	-	-	-	UNCHANGED	Unique BA2.5_Cotyledonary	Unique BA0_Cotyledonary
A0A445DAH2	9	3484.02	Uncharacterized protein	probable aldo-keto reductase 2 isoform X1	P:metabolic process	0	0	0	0	0	0	1621.59	3064.8	2093.51	3034.55	2739.99	3177.18	-	-	2259.97	2983.91	-	0.178272	-	-	-	0.400902	-	-	-	UNCHANGED	Unique BA2.5_Cotyledonary	Unique BA0_Cotyledonary
[truncated: 222 more rows]

## Sheet: config
ISOQuant Configuration
time	parameter	value
2019-10-10 10:48:58	isoquant.pluginQueue.name	design project and run ISOQuant analysis
[truncated: 57 more rows]

## Sheet: protein homology
reported protein	unique peptides	razor peptides	shared peptides	proteins sharing peptides
[truncated: 1,311 more rows]
